# Supplementary material
Source: PubMed Central journal article supplement (PMC3424834)
Supplement: es2043257_si_001.pdf [file es2043257_si_001.pdf]

# Supporting Information

Journal: *Environmental Science & Technology*

Manuscript Number: es-2011-043257

## **Estimates of embodied global energy and air-emission intensities of Japanese products for building a Japanese Input-Output Life Cycle Assessment database with a global system boundary**

\*Keisuke Nansai<sup>1,2</sup>, Yasushi Kondo<sup>3</sup>, Shigemi Kagawa<sup>4</sup>, Sangwon Suh<sup>5</sup>, Kenichi Nakajima<sup>1</sup>, Rokuta Inaba<sup>1</sup> and Susumu Tohno<sup>6</sup>

1. Center for Material Cycles and Waste Management Research, National Institute for Environmental Studies, 16-2 Onogawa, Tsukuba, 305-8506, Japan
2. Integrated Sustainability Analysis, School of Physics, The University of Sydney, NSW, 2006, Australia
3. Faculty of Political Science and Economics, Waseda University, 1-6-1 Nishi-waseda, Shinjuku-ku, Tokyo, 169-8050, Japan
4. Faculty of Economics, Kyushu University, 6-19-1 Hakozaki, Higashi-ku, Fukuoka, 812-8581, Japan
5. Bren School of Environmental Science and Management, University of California Santa Barbara, 3422 Bren Hall, CA, USA
6. Graduate School of Energy Science, Kyoto University, Yoshida Honmachi, Sakyo-ku, Kyoto 606-8501, Japan

\*Corresponding author

Center for Material Cycles and Waste Management Research, National Institute for Environmental Studies, 16-2 Onogawa, Tsukuba, Ibaraki 305-8506, Japan

Tel.: +81 29-850-2889

Fax: +81 29-850-2917

E-mail: nansai.keisuke@nies.go.jp

## Methods and data

### Intensities of embodied global environmental burden with a global link input–output model

The global link input-output (GLIO) model accounting framework specifically addressing the Japanese economy, as summarized in Table S2, allows us to define a detailed sectoral classification of Japanese commodities and describe the global supply chain associated with the Japanese economy. This framework is a partial simplification of the multiregional input-output model (MRIO) structure and is designed to reduce the time and labor costs of data compilation. Addressing the supply-demand equilibrium of Japanese commodities  $i_1$  and  $i_2$  and the supply-demand equilibrium in overseas country  $p$  and expressing each in algebraic terms using the matrices and vectors in Table S2 yields Eq. (S1).

$$\begin{pmatrix} \mathbf{x}^{JD} \\ \mathbf{x}^{JI} \\ \mathbf{x}^G \end{pmatrix} = \begin{pmatrix} \mathbf{X}^I & 0 & \mathbf{X}^{III} \\ 0 & 0 & 0 \\ \sum_{k=1}^l \mathbf{Y}^{I(k)} & \sum_{k=1}^l \mathbf{Y}^{II(k)} & \sum_{k=1}^l \mathbf{Y}^{III(k)} \end{pmatrix} \begin{pmatrix} \mathbf{i}^{JD} \\ \mathbf{i}^{JI} \\ \mathbf{i}^G \end{pmatrix} + \begin{pmatrix} \mathbf{f}^{JD} \\ \mathbf{f}^{JI} \\ \mathbf{f}^G \end{pmatrix} \quad (\text{S1})$$

Here,  $\mathbf{i}^{JD} = [n^{JD} \times 1]$ ,  $\mathbf{i}^{JI} = [n^{JI} \times 1]$  and  $\mathbf{i}^G = [n^G \times 1]$  are vectors of which all elements are unity.  $n^{JD}$ ,  $n^{JI}$  and  $n^G$  respectively represent the total number of Japanese domestic commodities, imported commodities serving Japanese final demand, and foreign countries and regions defined in the model.  $k$  denotes the foreign commodity types traded ( $k = 1 \dots l$ )

From here we can, for instance, estimate the embodied global GHG intensity of a given Japanese domestic commodity by converting Eq. (S1) as follows. To obtain the domestic and overseas GHG emissions induced by the domestic production of a Japanese commodity, we first convert exports from overseas sectors to Japan ( $\mathbf{Y}^{I(k)}$  and  $\mathbf{Y}^{II(k)}$ ) and trade among overseas sectors ( $\mathbf{Y}^{III(k)}$ ) to the amounts of GHG emissions embedded in the export or trade of commodity  $k$  ( $\tilde{\mathbf{Y}}^{I(k)}$ ,  $\tilde{\mathbf{Y}}^{II(k)}$  and  $\tilde{\mathbf{Y}}^{III(k)}$ ). These embedded emissions signify the amount of GHG emissions generated domestically within the exporting country for the production of foreign commodities. Similarly, the final demand  $\mathbf{f}^G$  in the overseas sectors is expressed as

the amount of embodied domestic emissions,  $\tilde{\mathbf{f}}^G$ , generated directly and indirectly within country  $p$  by  $\mathbf{f}^G$ . In other words, the conversion procedures presented above consider all GHG emissions within country  $p$  as being attributable to final demand for exports and domestic products in the country. Consequently, the diagonal element of  $\tilde{\mathbf{Y}}^{\text{III}(k)}$  that denotes the embedded emissions attributed to intermediate input of domestic commodities in foreign countries can be defined as zero.

Next, using the converted matrices and vectors we can formulate Eq. (S2), which expresses the material balance of GHG emissions for each foreign country. Here,  $\tilde{\mathbf{x}}^G$  represents the total emissions arising in country  $p$  as a result of all production and consumption.

$$\begin{pmatrix} \mathbf{x}^{JD} \\ \mathbf{x}^{JI} \\ \tilde{\mathbf{x}}^G \end{pmatrix} = \begin{pmatrix} \mathbf{X}^I & 0 & \mathbf{X}^{\text{III}} \\ 0 & 0 & 0 \\ \sum_{k=1}^l \tilde{\mathbf{Y}}^{\text{I}(k)} & \sum_{k=1}^l \tilde{\mathbf{Y}}^{\text{II}(k)} & \sum_{k=1}^l \tilde{\mathbf{Y}}^{\text{III}(k)} \end{pmatrix} \begin{pmatrix} \mathbf{i}^{JD} \\ \mathbf{i}^{JI} \\ \mathbf{i}^G \end{pmatrix} + \begin{pmatrix} \mathbf{f}^{JD} \\ \mathbf{f}^{JI} \\ \tilde{\mathbf{f}}^G \end{pmatrix} \quad (\text{S2})$$

Assuming that intermediate input and total output are directly proportional, regardless of whether one or both are converted to embedded emissions, the input coefficient matrices can be established as follows:

$$\mathbf{A}_{11} = \mathbf{X}^I (\hat{\mathbf{x}}^{JD})^{-1}, \tilde{\mathbf{A}}_{13} = \mathbf{X}^{\text{III}} (\hat{\mathbf{x}}^G)^{-1}, \tilde{\mathbf{A}}_{31}^{(k)} = \tilde{\mathbf{Y}}^{\text{I}(k)} (\hat{\mathbf{x}}^{JD})^{-1}, \tilde{\mathbf{A}}_{32}^{(k)} = \tilde{\mathbf{Y}}^{\text{II}(k)} (\hat{\mathbf{x}}^{JI})^{-1} \text{ and}$$

$$\tilde{\mathbf{A}}_{33}^{(k)} = \tilde{\mathbf{Y}}^{\text{III}(k)} (\hat{\mathbf{x}}^G)^{-1}. \text{ Here, a vector with the symbol } \hat{\ } \text{ indicates the diagonal matrix of the vector. We can}$$

then reformulate Eq. (S2) using these matrices to yield a final demand vector  $\mathbf{i}^{JD(i=\alpha)}$  with an element of unity solely for Japanese commodity  $i_1 = \alpha$  and an element of zero for other commodities. Using the

column vector  $\mathbf{d}^{JD}$ , the elements of which indicate the direct GHG emissions per unit production of the

Japanese commodities, we can obtain vectors  $\mathbf{e}^{JD(i=\alpha)} = \left( e_{j_1}^{JD(i=\alpha)} \right)$  and  $\mathbf{e}^{G(i=\alpha)} = \left( e_p^{G(i=\alpha)} \right)$  using Eq.

(S3). Elements  $e_{j_1}^{JD(i=\alpha)}$  and  $e_p^{G(i=\alpha)}$  represent the emission of sector  $j_1$  in Japan and that induced in

foreign country  $p$  by Japanese commodity  $i_1 = \alpha$ . Hence, Eq. (S4), summing these elements, yields the

embodied global GHG intensity of commodity  $e^{(i=\alpha)}$ , indicating the global GHG emissions induced by

unit production (M-JPY) of commodity  $\alpha$  in Japan. Here,  $\mathbf{I}$  is the identity matrix.

$$\begin{pmatrix} \mathbf{e}^{JD(i=\alpha)} \\ 0 \\ \mathbf{e}^{G(i=\alpha)} \end{pmatrix} = \begin{pmatrix} \mathbf{d}^{JD} \\ 0 \\ \mathbf{i}^G \end{pmatrix} \left\{ \mathbf{I} - \begin{pmatrix} \mathbf{A}_{11} & 0 & \tilde{\mathbf{A}}_{13} \\ 0 & 0 & 0 \\ \sum_{k=1}^l \tilde{\mathbf{A}}_{31}^{(k)} & \sum_{k=1}^l \tilde{\mathbf{A}}_{32}^{(k)} & \sum_{k=1}^l \tilde{\mathbf{A}}_{33}^{(k)} \end{pmatrix} \right\}^{-1} \begin{pmatrix} \mathbf{i}^{JD(i=\alpha)} \\ 0 \\ 0 \end{pmatrix} \quad (\text{S3})$$

$$e^{(i=\alpha)} = \sum_{j_1=1}^{n^{JD}} e_{j_1}^{JD(i=\alpha)} + \sum_{p=1}^{n^G} e_p^{G(i=\alpha)} \quad (\text{S4})$$

## Uncertainties in intensities of embodied global environmental burden attributable to the model structure

### *Factors giving rise to uncertainty*

The GLIO is designed to reduce the time and labor burdens of LCI data compilation with a global system boundary by using aggregated multiregional input-output structures for countries other than Japan, the economy of which is the specific focus here. However, this aggregated description affects the robustness of the embodied environmental burden intensities derived using GLIO. By means of Monte Carlo simulation we therefore estimated the uncertainties in the embodied environmental intensities resulting from that description. Taking the case of total GHG emissions as an example, we proceeded as follows.

In the above simplified multiregional input–output structure, each column of the matrices  $\tilde{\mathbf{A}}_{13}$  and

$\sum_{k=1}^l \tilde{\mathbf{A}}_{33}^{(k)}$  in Eq. (S3) represents a country’s overall import structure, which means the matrices do not differentiate among the import structures of the various commodities produced in that country. In concrete terms,  $\tilde{a}_{i_1,q}$ , an element of  $\tilde{\mathbf{A}}_{13}$ , represents the import of Japanese commodity  $i_1$  (on a monetary basis) for unit output of country  $q$ , while  $\tilde{a}_{pq}$ , an element of  $\sum_{k=1}^l \tilde{\mathbf{A}}_{33}^{(k)}$ , denotes the total import of embodied GHG generated in country  $p$  for unit output of country  $q$ . Here, the unit output is expressed as a unit direct GHG emission of the overseas country. Because in reality the import structure of country  $q$  varies among

types of output or commodities, this study assumes that the elements of matrices  $\tilde{\mathbf{A}}_{13}$  and  $\sum_{k=1}^l \tilde{\mathbf{A}}_{33}^{(k)}$  include any uncertainties.

Accordingly, this study defined matrices  $\Phi_{13} = [\phi_{iq}]$  and  $\Phi_{33} = [\phi_{pq}]$  comprising the potential deviation of each element as the uncertainty in  $\tilde{\mathbf{A}}_{13}$  and  $\sum_{k=1}^l \tilde{\mathbf{A}}_{33}^{(k)}$ , respectively, and calculated  $\Delta\tilde{\mathbf{A}}_{13}$  and  $\Delta\sum_{k=1}^l \tilde{\mathbf{A}}_{33}^{(k)}$  according to Eq. (S5) and (S6). Here,  $\Phi_{13}$  and  $\Phi_{33}$  are matrices of the same size as  $\tilde{\mathbf{A}}_{13}$  and  $\sum_{k=1}^l \tilde{\mathbf{A}}_{33}^{(k)}$ , respectively, and  $\otimes$  is the Hadamard product representing the operator of element-wise multiplication. The results,  $\Delta\tilde{\mathbf{A}}_{13}$  and  $\Delta\sum_{k=1}^l \tilde{\mathbf{A}}_{33}^{(k)}$ , were substituted for  $\tilde{\mathbf{A}}_{13}$  and  $\sum_{k=1}^l \tilde{\mathbf{A}}_{33}^{(k)}$ , respectively, in Eq. (S3) to calculate the embodied global GHG intensities in Eq. (S4).

Matrices  $\Phi_{13}$  and  $\Phi_{33}$  were generated through Monte Carlo simulation. The uncertainty in each of the embodied global GHG intensities was estimated using the embodied global GHG intensities obtained in each simulation.

$$\Delta\tilde{\mathbf{A}}_{13} = \tilde{\mathbf{A}}_{13} \otimes \Phi_{13} \quad (\text{S5})$$

$$\Delta\sum_{k=1}^l \tilde{\mathbf{A}}_{33}^{(k)} = \left( \sum_{k=1}^l \tilde{\mathbf{A}}_{33}^{(k)} \right) \otimes \Phi_{33} \quad (\text{S6})$$

### *Specification of matrices $\Phi_{13}$ and $\Phi_{33}$*

Matrices  $\tilde{\mathbf{A}}_{13}$  and  $\sum_{k=1}^l \tilde{\mathbf{A}}_{33}^{(k)}$  combine all the products of country  $q$  into a single metric. The input coefficient of country  $q$  is thus expressed in one column, as a single product type. In more everyday terms, this can be understood as being the average of the input coefficients (defined in multiple columns), which vary according to the type of product. The elements  $\phi_{iq}$  and  $\phi_{pq}$  of matrices  $\Phi_{13}$  and  $\Phi_{33}$ , respectively, are coefficients indicating how uncertain the average input coefficient is, i.e. the potential

deviation from the average. This study specified the values that can be taken by  $\phi_{i_1,q}$  and  $\phi_{pq}$  for each commodity  $i_1$  and country  $p$  and randomly selected  $\phi_{i_1,q}$  and  $\phi_{pq}$  from among such values to develop matrices  $\Phi_{13}$  and  $\Phi_{33}$  and then calculate  $\Delta\tilde{\mathbf{A}}_{13}$  and  $\Delta\sum_{k=1}^l \tilde{\mathbf{A}}_{33}^{(k)}$ .

The issue of concern here is how to specify the values available for each  $\phi_{i_1,q}$  and  $\phi_{pq}$ . It is by no means certain that  $\phi_{i_1,q}$  and  $\phi_{pq}$  conform to a well-known probability distribution like a normal distribution. In this study we therefore made the empirical distribution of  $\phi_{i_1,q}$  and  $\phi_{pq}$  for each commodity  $i_1$  and country  $p$  based on the following assumptions. First, each country in  $\tilde{\mathbf{A}}_{13}$  and  $\sum_{k=1}^l \tilde{\mathbf{A}}_{33}^{(k)}$  was assumed to produce the  $k$  ( $= 1 \dots 111$ ) types of commodities identified in the model employed in this study. Then, under the assumption that country  $p$  produces commodity  $k$  only, we next estimated for each of the input coefficients of commodity  $i_1$  from country  $p$  the relative increase or decrease from the average.

As an example of the results thus estimated, Figure S1 shows the empirical distribution of coefficient  $\phi_{p=97}^{(k)}$ , indicating by how many times the input coefficient from country  $p=97$  (United States: USA) to country  $q$  is multiplied if country  $p$  produces commodity  $k$  only. The horizontal axis depicts the type of commodity  $k$  produced in country  $q$ , while the vertical axis shows the value of  $\phi_{p=97}^{(k)}$ . The simple average of  $\phi_{p=97}^{(k)}$  from  $k=1$  to 111 is 1. The Monte Carlo simulation generates pseudorandom numbers, integers between 1 and 111, which correspond to commodity  $k$  for each country  $q$  and which use the corresponding  $\phi_{p=97}^{(k)}$  from Figure S1 and substitute it for  $\phi_{p=97,q}$  in matrix  $\Phi_{33}$ . Empirical distributions  $\phi_p^{(k)}$  and  $\phi_{i_1}^{(k)}$  equivalent to Figure S1 are made for other countries  $p$  and commodities  $i_1$ , respectively. Values corresponding to countries  $q$ , for which pseudorandom number  $k$  was selected, are taken from the empirical distributions and substituted for  $\phi_{i_1,q} = \phi_{i_1}^{(k)}$  and  $\phi_{pq} = \phi_p^{(k)}$  to define matrices  $\Phi_{13}$  and  $\Phi_{33}$ . In other words, specifying commodity  $k$  produced based on the pseudorandom number for country  $q$  determines all

values of  $\phi_{i,q}$  and  $\phi_{pq}$ .

*Estimate of empirical distributions of elements  $\phi_i^{(k)}$  and  $\phi_p^{(k)}$*

This study estimated the empirical distributions of  $\phi_i^{(k)}$  and  $\phi_p^{(k)}$ , as defined above, by referring to the input structure of Japan's domestic product sectors  $j_1$ . First, the domestic product sectors ( $j_1 = 1 \dots 406$ ) and the commodity categories  $k$  ( $= 1 \dots 111$ ) of overseas sectors were matched up. Then, the input  $\bar{\phi}_i^{(k)}$  [M-JPY/tCO<sub>2</sub>] of Japanese product sectors  $i_1$  used per unit of direct GHG emissions from production of commodity  $k$  was calculated as indicated in Eq. (S7). In other words,  $\bar{\phi}_i^{(k)}$  is the element of the matrix obtained by dividing the matrix of which the row sectors of  $\mathbf{A}_{11} = [a_{i_1 j_1}]$  are aggregated into sector category  $k$  by the vector of which the elements are the product of the output  $x_{j_1}^{JD}$  aggregated into sector category  $k$  and the direct emissions  $d_{j_1}$  similarly aggregated into sector category  $k$ . Therefore,  $\bar{\phi}_i^{(k)}$  is based conceptually on the same calculation method as the input coefficient of  $\tilde{\mathbf{A}}_{13}$  and has the same unit. Subsequently, the average of  $\phi_i^{(k)}$  was converted to 1 using Eq. (S8), leading to specification of  $\phi_i^{(k)}$  as shown.

$$\bar{\phi}_i^{(k)} = \frac{\sum_{j_1 \in k} a_{i_1 j_1} x_{j_1}^{JD}}{\sum_{j_1 \in k} d_{j_1} x_{j_1}^{JD}} \quad (\text{S7})$$

$$\phi_i^{(k)} = \frac{\bar{\phi}_i^{(k)}}{\sum_{k=1}^l \bar{\phi}_i^{(k)} / l} \quad (\text{S8})$$

Based on the same idea, the input  $\bar{\phi}_p^{(k)}$  [tCO<sub>2</sub>eq/tCO<sub>2</sub>eq] from overseas sector  $p$  required per unit of direct GHG emissions associated with commodity  $k$  was calculated according to Eq. (S9). The input amount from overseas sector  $p$  was set on the basis of the GHG emissions embodied in the input goods to make it conceptually equivalent to the input coefficient of  $\tilde{\mathbf{A}}_{33}$ . This was followed by calculation of  $\phi_p^{(k)}$  by

converting the average of  $\bar{\phi}_p^{(k)}$  to 1 using Eq. (S10). Figure S1 presents the graph produced by plotting

$\phi_{p=97}^{(k)}$  for  $p=97$  (USA) against  $\phi_p^{(k)}$ .

$$\bar{\phi}_p^{(k)} = \frac{\sum_{j_i \in k} \tilde{a}_{p,j_i} x_{j_i}^{JD}}{\sum_{j_i \in k} d_{j_i} x_{j_i}^{JD}} \quad (\text{S9})$$

$$\phi_p^{(k)} = \frac{\bar{\phi}_p^{(k)}}{\sum_{k=1}^l \bar{\phi}_p^{(k)} / l} \quad (\text{S10})$$

### *The coefficient of variation of embodied environmental burden intensity*

Using a Monte Carlo simulation, we prepared  $10^5$  variants of matrices  $\Phi_{13}$  and  $\Phi_{33}$  and inserted these into Eqs. (S3) and (S4) to create a sample of embodied global GHG intensities  $e_{mc}^{(i=\alpha)}$  ( $mc = 1 \dots 10^5$ ) to calculate the uncertainty in each sector. Subsequently, using  $e^{(i=\alpha)}$  obtained from Eqs. (S3) and (S4) with all elements of  $\Phi_{13}$  and  $\Phi_{33}$  set equal to unity, the deviation of each sample (mc) from  $e^{(i=\alpha)}$  was calculated as  $\left| \log \left( e_{mc}^{(i=\alpha)} / e^{(i=\alpha)} \right) \right|$ . The deviation was then calculated for all sectors  $i_1$  in each simulation and the maximum deviation defined as the representative deviation  $\Delta_{mc} = \max \left( \left| \log \left( e_{mc}^{(i_1)} / e^{(i_1)} \right) \right| \right)$  of the simulation (mc). Then, the values of  $\Delta_{mc}$  were ranked in order from the largest down, thereby excluding the sample  $e_{mc}^{(i=\alpha)}$  corresponding to the simulation numbers (mc = *Trimmed*) equivalent to the largest 5% of all  $\Delta_{mc}$  from the calculation of the standard deviation  $\sigma^{(i=\alpha)}$  of  $e^{(i=\alpha)}$ . The coefficient of variation  $\nu\mathcal{C}^{(i=\alpha)}$  (%) was calculated by dividing  $\sigma^{(i=\alpha)}$  by  $e^{(i=\alpha)}$ , as shown in Eq. (S11). This study used  $\nu\mathcal{C}^{(i=\alpha)}$  as an indicator of uncertainty in the embodied global GHG intensities.



$$vc^{(i=\alpha)} = \frac{\sigma^{(i=\alpha)}}{e^{(i=\alpha)}} \times 100 = \frac{\sqrt{\frac{\sum_{mc \notin Trimmed} (e_{mc}^{(i=\alpha)} - e^{(i=\alpha)})^2}{(1-0.05) \times 10^5}}}{e^{(i=\alpha)}} \times 100 \quad (S11)$$

## The sectors with the most characteristic embodied global GHG intensities

This paper identified the sectors with the most characteristic embodied global GHG intensities as follows.

### *Sectors with the highest embodied global GHG intensity*

The sectors with the highest embodied global GHG intensity were identified by comparing  $e^{(i=\alpha)}$ .

### *Sectors with the highest percentage share of induced emissions in foreign countries*

The share of overseas emissions in the embodied global GHG intensity was calculated in the form of

$$\sum_{p=1}^{n^G} e_p^{G(i=\alpha)} / e^{(i=\alpha)}.$$

### *Sectors with the greatest difference from the embodied GHG intensities under the domestic technology assumption (DTA)*

An embodied GHG intensity  $e_{DTA}^{(i=\alpha)}$  based on an input–output analysis under the domestic technology assumption (DTA) means that the GHG emissions associated with imports are assumed to be the same as those of equivalent domestic (Japanese) products. The difference (%) between  $e_{DTA}^{(i=\alpha)}$  and the embodied global GHG intensity  $e^{(i=\alpha)}$  derived in this study was determined as  $(e_{DTA}^{(i=\alpha)} - e^{(i=\alpha)}) / e^{(i=\alpha)} \times 100$ . The embodied GHG intensity  $e_{DTA}^{(i=\alpha)}$  was taken from 3EID [1] for 2005.

### *Sectors with the greatest uncertainty in embodied global GHG intensity*

The embodied global GHG intensities with the greatest uncertainty were identified by comparing the coefficient of variation  $\gamma C^{(i=\alpha)}$  of the embodied global GHG intensities.

## **Overall trends of the structural characteristics of embodied global GHG intensity**

This paper examined overall trends in the characteristic of embodied global GHG intensity as follows.

### *Trend of magnitude of embodied global GHG intensity*

The share (%) of the domestic output (M-JPY/y) of each sector in gross Japanese domestic output (M-JPY/y) was obtained, and the relationship between this share and embodied global GHG intensity was plotted in Figure 2(a) in the main text. The coefficient of correlation between this share and the embodied global GHG intensity was calculated. Spearman's  $\rho$  of the variables was also calculated.

The ratio of value added (M-JPY/M-JPY) in the total output of each sector was obtained, and the relationship between this ratio and embodied global GHG intensity was plotted in Figure 2(b) in the main text. The coefficient of correlation between the value added ratio and the embodied global GHG intensity was determined.

The share (%) of the direct GHG emissions (t-CO<sub>2</sub>eq/y) of each sector in total Japanese GHG emissions (t-CO<sub>2</sub>eq/y) was obtained, and the relationship between this share and embodied global GHG intensity was plotted in Figure 2(c) in the main text. The coefficient of correlation between this share and the embodied global GHG intensity was calculated.

### *Trend of induced foreign GHG emissions in embodied global GHG intensity*

The coefficient of correlation between the direct domestic GHG emissions per unit output of each sector

(t-CO<sub>2</sub>eq/M-JPY),  $d_{i_1}^{JD}$  of vector  $\mathbf{d}^{JD}$  in Eq. (S3), and the embodied global GHG intensity was determined.

The relationship between the direct domestic GHG emission and embodied global GHG intensity was plotted in Figure 2(d) in the main text.

The induced domestic GHG emissions component of the embodied global GHG intensity (t-CO<sub>2</sub>eq/M-JPY)

was calculated as  $\sum_{j_1=1}^{n^{JD}} e_{j_1}^{JD(i_1=\alpha)} - d_{i_1}^{JD}$  and the coefficient of correlation between this value and the induced

foreign GHG emissions component  $\sum_{p=1}^{n^G} e_p^{G(i_1=\alpha)}$  (t-CO<sub>2</sub>eq/M-JPY) was then determined. Spearman's  $\rho$  of

the variables was also calculated. The relationship between the induced domestic GHG emissions and embodied global GHG intensity was plotted in Figure 2(e) in the main text.

### *Trend of difference in embodied global GHG intensity under the domestic technology assumption (DTA)*

Figure 2 (f) in the main text plots the share (%) of foreign emissions in the embodied global GHG intensity,

$\sum_{p=1}^{n^G} e_p^{G(i_1=\alpha)} / e^{(i_1=\alpha)}$ , and the difference between the embodied GHG intensity under the DTA  $e_{DTA}^{(i_1=\alpha)}$  and

the embodied global GHG intensity  $e^{(i_1=\alpha)}$ ,  $(e_{DTA}^{(i_1=\alpha)} - e^{(i_1=\alpha)}) / e^{(i_1=\alpha)}$ . The coefficient of correlation

between the foreign emissions' share  $\sum_{p=1}^{n^G} e_p^{G(i_1=\alpha)} / e^{(i_1=\alpha)}$  and  $\left| (e_{DTA}^{(i_1=\alpha)} - e^{(i_1=\alpha)}) / e^{(i_1=\alpha)} \right|$  was determined.

Spearman's  $\rho$  of the variables was also calculated.

### *Trend of uncertainty in embodied GHG intensity*

The share (%) of induced foreign emissions in the embodied global GHG intensity  $\sum_{p=1}^{n^G} e_p^{G(i_1=\alpha)} / e^{(i_1=\alpha)}$  was

compared with the coefficient of variation  $vc^{(i_1=\alpha)}$ , yielding the coefficient of correlation between the two.

Spearman's  $\rho$  of the variables was also calculated. Figure 2 (g) plots their relationship.

We defined twenty-one broad commodity categories and calculated a weighted average (WA) of the embodied global GHG intensity for each by averaging the embodied global GHG intensities of the constituent sectors using a weighting coefficient based on the total domestic output of each sector. We then assessed the effect of sector aggregation on increase of uncertainties of the embodied global GHG intensities by comparing the weighted average of the category with the maximum and minimum embodied global GHG intensity. Table S1 shows the result.

## **Discussion**

### **Usefulness of the embodied global GHG emission for managing Japanese consumption-based GHG emissions**

The consumption-based GHG emission [2] [3] is a measure of the global emissions caused directly and indirectly by a country's final demand. In our previous paper [4] this emission in 2005 was quantified for Japan in 2005 using the GLIO model, revealing that household consumption is the main component of domestic final demand determining it and citing the importance of managing consumption-based emissions for becoming a “carbon debt-free country”, i.e. attaining at least equality between consumption-based and production-based emissions. At the level of the individual enterprise, in particular, the consumption-based GHG emission is conceptually similar to the notions defined in Scope 3 of the GHG Protocol Initiative [5] and TR 14069 (organizational carbon footprint) [6] as a technical report to complement ISO14064-1. Taking vigorous steps to control consumption-based emissions at the individual level, local government level and corporate level would eventually lead to Japan becoming a “carbon debt-free country”. The embodied global GHG emission intensities provided in the present paper enable these actors to estimate their own consumption-based emissions.

### **Limitations of intensities of embodied global environmental burden based on the GLIO model**

Because the GLIO model is based on the simplified structure of a MRIO model, the consequent uncertainties in the intensities of embodied global environmental burden have been quantitatively analyzed. Additionally, the GLIO model is built on an input–output framework, which in itself has several methodological limitations.

First, the production functions of goods and services are defined as fixed input coefficients. This means emissions grow in proportion to output, so that possible improvements in environmental efficiency will not

be duly reflected, even if these are achieved through mass production. Furthermore, the use of economic and environmental data for 2005 in this study suggests the need, when using goods and services from different years in LCA, to consider whether the production technology, energy consumption and structure of supply chains can be regarded as equivalent to those in 2005.

This model has derived embodied environmental intensities using the detailed sectoral categorization of Japan's input–output table, which is classified into 406 sectors. In reality, each sector comprises multiple products and services. Even if commodities actually use completely different technologies, applying the same embodied environmental burden intensity across the sector results in determination of the environmental burden of each commodity in proportion to its producer price. Particularly when comparing commodities in the same sector, then, it will be necessary to adopt an assessment method that does due justice to significant technological differences, by collecting actual process data and using hybrid LCA.

## **Methodological applicability to other countries**

This study has compiled the intensities of embodied global environmental burden of the goods and services produced in Japan. At present, there is no other LCA database on Japanese commodities that theoretically guarantees a global system boundary for LCI. The embodied global energy and air-emission intensities listed in the SI will therefore be useful for LCA practitioners in many other countries, too, given the fact that in 2007 Japan generated the world's fifth highest GHG emissions and had the largest export value of any country. As an illustration, when a company using Japanese products quantifies the global carbon footprint of its own activities, the embodied global GHG intensities of Japanese export commodities like automobiles, semiconductors and cameras would be very useful for obtaining a rough estimate of the GHG emissions embedded in those products. In addition to including the global GHG emissions associated with upstream economic activities in the carbon footprints of product manufacture, the embodied global GHG intensities could also be used to assess downstream activities like waste treatment [7], recycling [8] and product lifetime extension [9]. For instance, it is possible to estimate the reduction in global GHG emissions due to the recycling of steel, aluminum and copper products in Japan.

This paper has used a GLIO centered on Japan, but the GLIO modeling framework as such can be equally well used in other countries that compile their own input–output table. All this requires, in concrete terms, is replacement of the Japanese input–output table used for this study by the table of the country concerned, simultaneously including Japan in the overseas sector and excluding the country in question from that sector. Therefore, most of the economic and environmental data in this paper can be inserted directly into applications for other countries. Such a GLIO, centered on a different country, permits calculation of the embodied global environmental burden of goods and service produced in that country. As seen in Table S1 in the SI, an embodied global GHG intensity with low sectoral resolution merely captures a single point within the wide range of intensities of the various commodities belonging to the same commodity category. Particularly for countries with an input–output table based on high sectoral resolution, such as the United States or South Korea, the approach presented in the present study can therefore be recommended as a low-cost means of compiling a LCA database with a global system boundary.

**Table S1: Weighted average (WA), minimum (Min.), maximum (Max.) and range (Range) of embodied global GHG emission intensities of sectors included in aggregated sectors, of their share of foreign emissions, and of their coefficient of variation.**

| Category code in Fig.1 | Sector category name                                                  | Embodied global GHG intensities based on producer price |                              |                              |          | Share of foreign emissions in embodied global GHG intensity |      |      |          | Coefficient of variation of the embodied emission intensity |      |      |          |
|------------------------|-----------------------------------------------------------------------|---------------------------------------------------------|------------------------------|------------------------------|----------|-------------------------------------------------------------|------|------|----------|-------------------------------------------------------------|------|------|----------|
|                        |                                                                       | WA                                                      | Min.                         | Max.                         | Range    | WA                                                          | Min. | Max. | Range    | WA                                                          | Min. | Max. | Range    |
|                        |                                                                       | [t-CO <sub>2</sub> eq/M-JPY]                            | [t-CO <sub>2</sub> eq/M-JPY] | [t-CO <sub>2</sub> eq/M-JPY] | [%]      | [%]                                                         | [%]  | [%]  | [%]      | [%]                                                         | [%]  | [%]  | [%]      |
| AG                     | Agriculture, forestry and fisheries                                   | 6.8                                                     | 0.50                         | 15                           | 7 - 221  | 23                                                          | 8.3  | 70   | 36 - 304 | 3.3                                                         | 0.85 | 22   | 26 - 667 |
| MN                     | Mining                                                                | 6.5                                                     | 5.7                          | 9.9                          | 88 - 152 | 15                                                          | 7.6  | 18   | 51 - 120 | 2.4                                                         | 0.79 | 2.9  | 33 - 121 |
| FD                     | Food                                                                  | 4.9                                                     | 0.89                         | 12                           | 18 - 245 | 41                                                          | 13   | 82   | 32 - 200 | 5.0                                                         | 1.4  | 16   | 28 - 320 |
| TX                     | Textiles                                                              | 5.4                                                     | 3.9                          | 9.5                          | 72 - 176 | 34                                                          | 21   | 56   | 62 - 165 | 3.7                                                         | 2.1  | 6.6  | 57 - 178 |
| PL                     | Pulp, paper and wooden products                                       | 7.4                                                     | 2.6                          | 19                           | 35 - 257 | 21                                                          | 13   | 66   | 62 - 314 | 2.7                                                         | 1.4  | 6.6  | 52 - 244 |
| CH                     | Chemical products                                                     | 8.2                                                     | 3.0                          | 21                           | 37 - 256 | 33                                                          | 12   | 59   | 36 - 179 | 4.2                                                         | 1.3  | 10   | 31 - 238 |
| PT                     | Petroleum refinery and coal                                           | 9.2                                                     | 4.2                          | 22                           | 46 - 239 | 66                                                          | 43   | 68   | 65 - 103 | 15                                                          | 8.2  | 16   | 55 - 107 |
| CR                     | Ceramic, stone and clay products                                      | 19                                                      | 5.8                          | 138                          | 32 - 726 | 7.6                                                         | 2.0  | 52   | 26 - 684 | 1.4                                                         | 0.26 | 4.6  | 19 - 329 |
| ST                     | Iron and steel                                                        | 29                                                      | 9.9                          | 73                           | 34 - 252 | 15                                                          | 9.2  | 46   | 61 - 307 | 1.7                                                         | 0.95 | 4.4  | 56 - 259 |
| NF                     | Non-ferrous metals                                                    | 8.5                                                     | 4.0                          | 11                           | 47 - 129 | 70                                                          | 43   | 86   | 61 - 123 | 6.6                                                         | 3.7  | 8.9  | 56 - 135 |
| MT                     | Metal products                                                        | 6.7                                                     | 5.5                          | 8.7                          | 82 - 130 | 32                                                          | 22   | 45   | 69 - 141 | 3.9                                                         | 1.9  | 5.5  | 49 - 141 |
| GM                     | General machinery                                                     | 4.4                                                     | 3.2                          | 7.2                          | 73 - 164 | 30                                                          | 21   | 44   | 70 - 147 | 2.9                                                         | 1.8  | 5.1  | 62 - 176 |
| EM                     | Electrical machinery                                                  | 4.2                                                     | 2.7                          | 5.8                          | 64 - 138 | 44                                                          | 34   | 64   | 77 - 145 | 4.3                                                         | 3.1  | 6.9  | 72 - 160 |
| IT                     | ICT devices                                                           | 3.4                                                     | 2.9                          | 3.8                          | 85 - 112 | 52                                                          | 43   | 60   | 83 - 115 | 6.0                                                         | 4.5  | 7.8  | 75 - 130 |
| ED                     | Electrical devices                                                    | 4.5                                                     | 4.1                          | 8.7                          | 91 - 193 | 38                                                          | 13   | 49   | 34 - 129 | 3.9                                                         | 1.1  | 5.5  | 28 - 141 |
| TM                     | Transport equipment                                                   | 4.8                                                     | 2.9                          | 8.1                          | 60 - 169 | 32                                                          | 20   | 69   | 63 - 216 | 3.1                                                         | 1.7  | 17   | 55 - 535 |
| PM                     | Precision machinery                                                   | 3.1                                                     | 2.8                          | 3.7                          | 90 - 119 | 39                                                          | 27   | 48   | 69 - 123 | 4.1                                                         | 2.4  | 10   | 59 - 249 |
| OT                     | Miscellaneous manufacturing products                                  | 4.2                                                     | 2.6                          | 7.1                          | 62 - 169 | 36                                                          | 12   | 67   | 33 - 186 | 3.6                                                         | 2.0  | 9.3  | 56 - 258 |
| CS                     | Construction                                                          | 4.1                                                     | 3.0                          | 5.2                          | 73 - 127 | 26                                                          | 17   | 38   | 65 - 146 | 2.5                                                         | 1.6  | 3.2  | 64 - 128 |
| EL                     | Electric power, gas supply and steam, water supply and waste disposal | 21                                                      | 1.5                          | 69                           | 10 - 329 | 10                                                          | 3.9  | 71   | 39 - 710 | 2.1                                                         | 0.42 | 10   | 20 - 476 |
| SR                     | Services                                                              | 2.0                                                     | 0.15                         | 27                           | 5 - 1350 | 25                                                          | 8.6  | 48   | 34 - 192 | 3.5                                                         | 1.5  | 17   | 43 - 486 |



**Table S2: Matrices and vectors for the Japanese case study using the global link input-output (GLIO) model. Abbreviations as follows: sc1, sector category (tier 1); sc2, sector category (tier 2); sn, sector number; JP, Japanese sector; OS, overseas sector; FD, final demand of sector; TO, total output of sector; VA, value added of sector; *DC*, domestic commodity; *IC*, imported commodity directly input to Japanese final demand; *FC*, foreign country and region. Superscript *k* denotes the foreign commodity type.**

|     |           | sc1               | JP                               |                                   | OS                                 | FD                | TO                |
|-----|-----------|-------------------|----------------------------------|-----------------------------------|------------------------------------|-------------------|-------------------|
|     |           | sc2               | <i>DC</i>                        | <i>IC</i>                         | <i>FC</i>                          |                   |                   |
| sc1 | sc2       | sn                | $(j_1 = 1...406)$                | $(j_2 = 1...406)$                 | $(q = 1...230)$                    | [1]               | [1]               |
| JP  | <i>DC</i> | $(i_1 = 1...406)$ | $\mathbf{X}^I$                   | $\mathbf{0}$                      | $\mathbf{X}^{III}$                 | $\mathbf{f}^{JD}$ | $\mathbf{x}^{JD}$ |
|     | <i>IC</i> | $(i_2 = 1...406)$ | $\mathbf{0}$                     | $\mathbf{0}$                      | $\mathbf{0}$                       | $\mathbf{f}^{JI}$ | $\mathbf{x}^{JI}$ |
| OS  | <i>FC</i> | $(p = 1...230)$   | $\sum_{k=1}^l \mathbf{Y}^{I(k)}$ | $\sum_{k=1}^l \mathbf{Y}^{II(k)}$ | $\sum_{k=1}^l \mathbf{Y}^{III(k)}$ | $\mathbf{f}^G$    | $\mathbf{x}^G$    |
| VA  | -         | [1]               | $\mathbf{v}^{JD}$                | $\mathbf{0}$                      | $\mathbf{v}^G$                     |                   |                   |
| TO  | -         | [1]               | $\mathbf{x}^{JD}$                | $\mathbf{x}^{JI}$                 | $\mathbf{x}^G$                     |                   |                   |

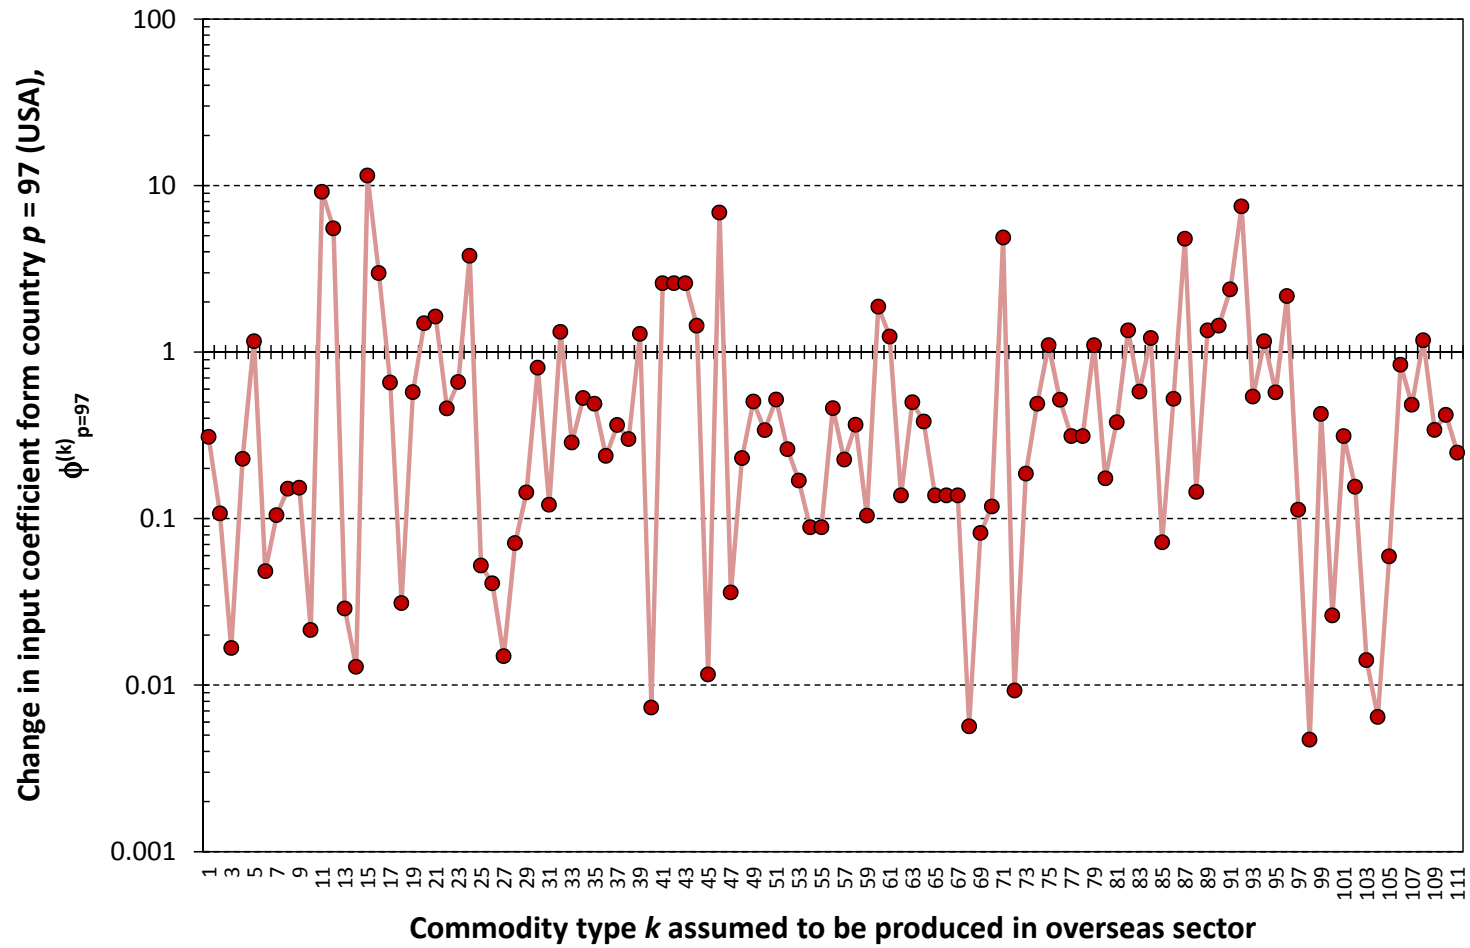

Figure S1: Example of estimated empirical distribution of coefficient  $\phi_{p=97}^{(k)}$  indicating by how many times the input coefficient from country  $p = 97$  (USA) to country  $q$  is multiplied if country  $p$  produces commodity  $k$  only.

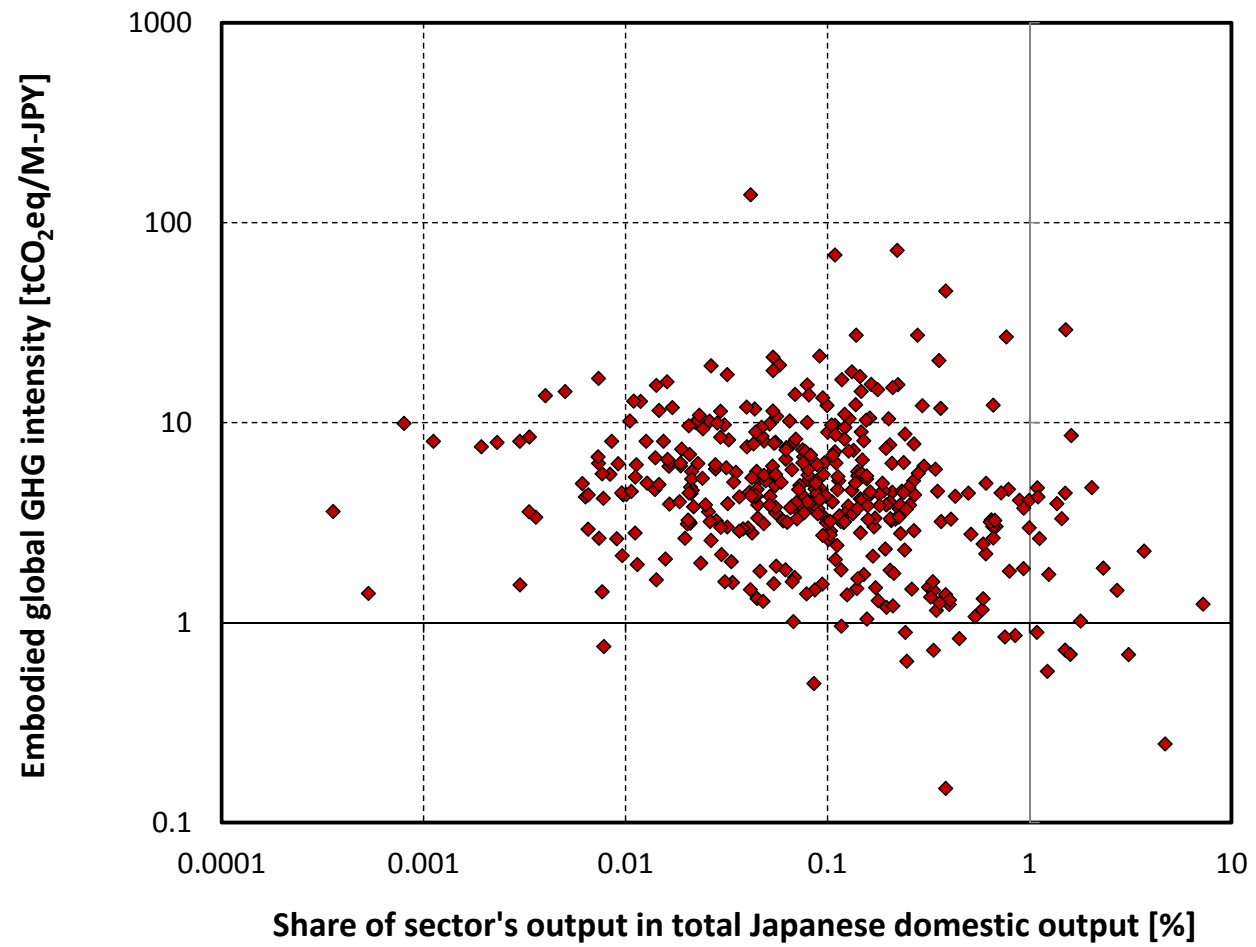

Enlargement of Figure 2 (a) in the main text.  $R^2$  is 0.0069 for  $y = -1.3299x + 6.6876$  and 0.0079 for  $y = 0.203x^2 - 2.2356x + 6.8294$ .

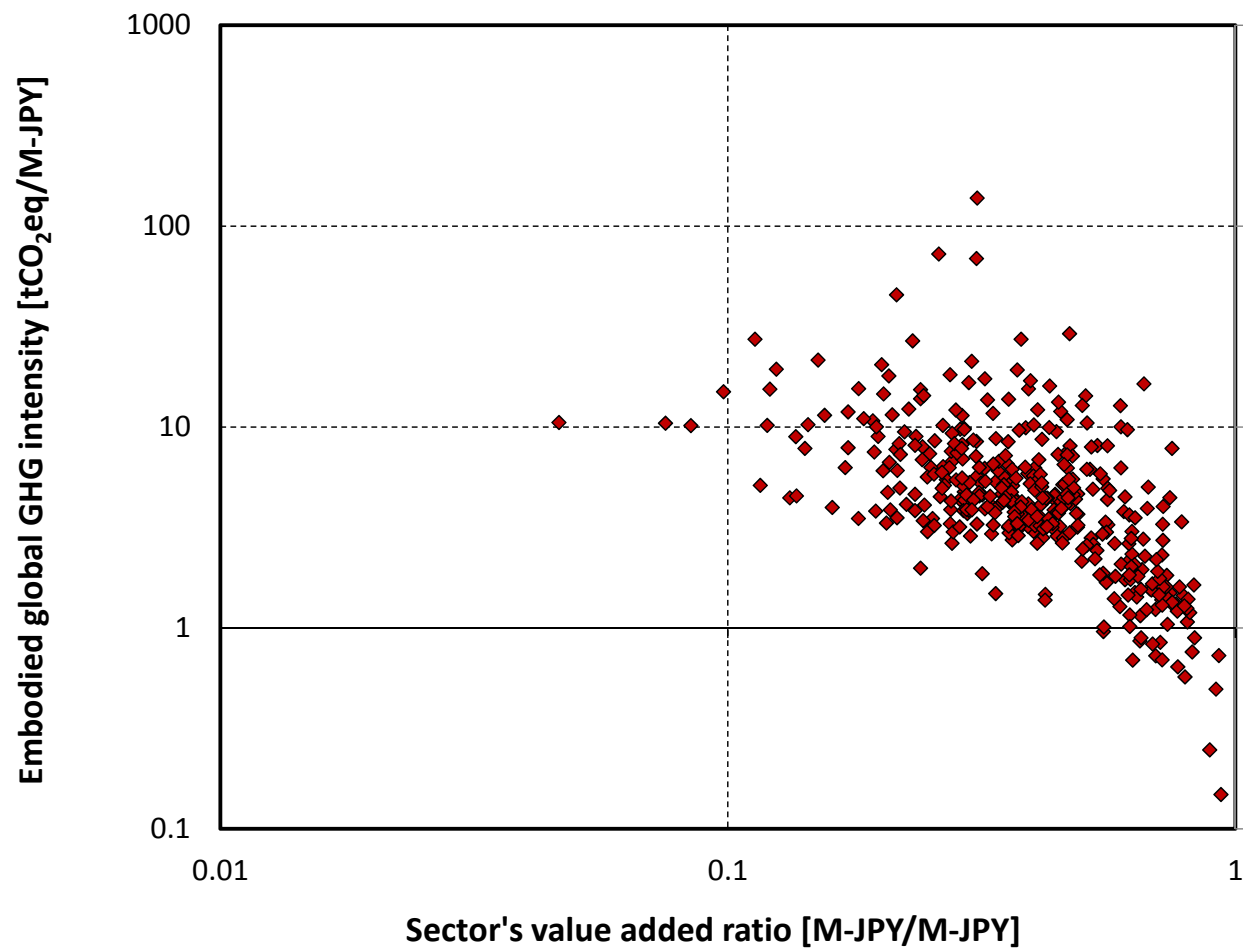

Enlargement of Figure 2 (b) in the main text.  $R^2$  is 0.0857 for  $y = -15.033x + 12.736$  and 0.0861 for  $y = 4.7019x^2 - 19.396x + 13.582$ .

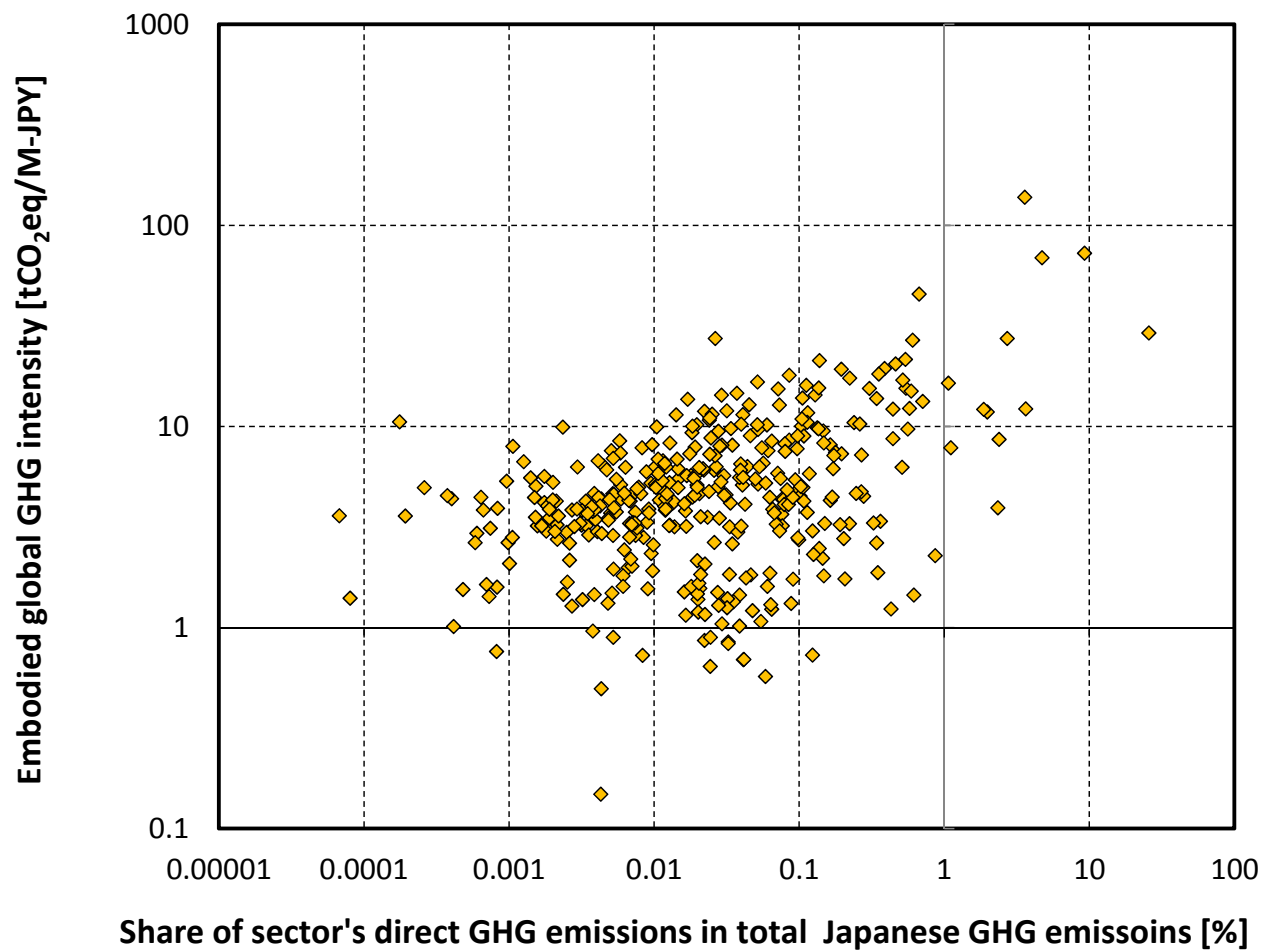

Enlargement of Figure 2 (c) in the main text.  $R^2$  is 0.1621 for  $y = 2.6575x + 5.7742$  and 0.468 for  $y = -0.463x^2 + 12.848x + 4.5346$ .

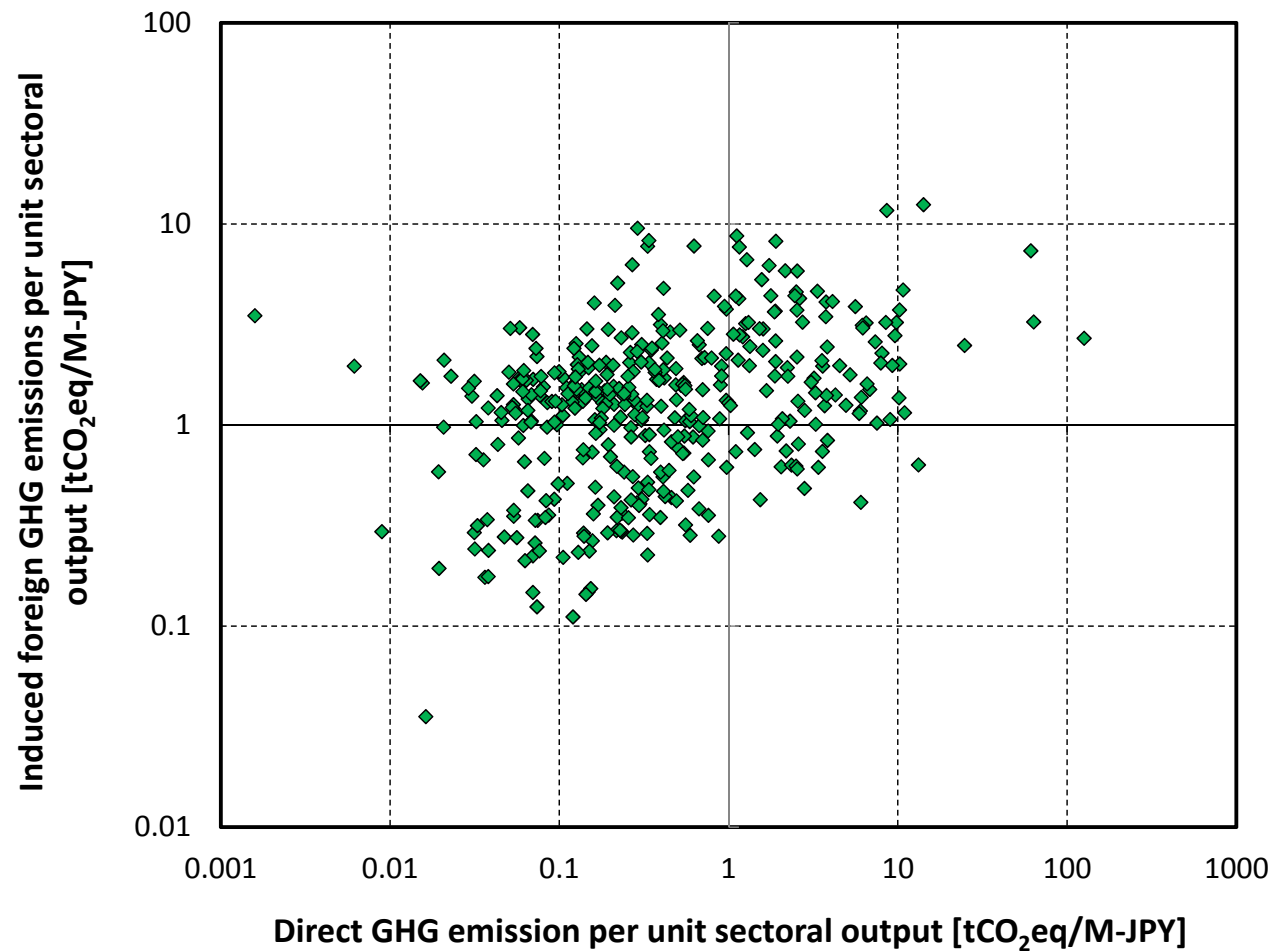

Enlargement of Figure 2 (d) in the main text.  $R^2$  is 0.0369 for  $y = 0.0401x + 1.6452$  and 0.0966 for  $y = -0.0013x^2 + 0.1635x + 1.499$ .

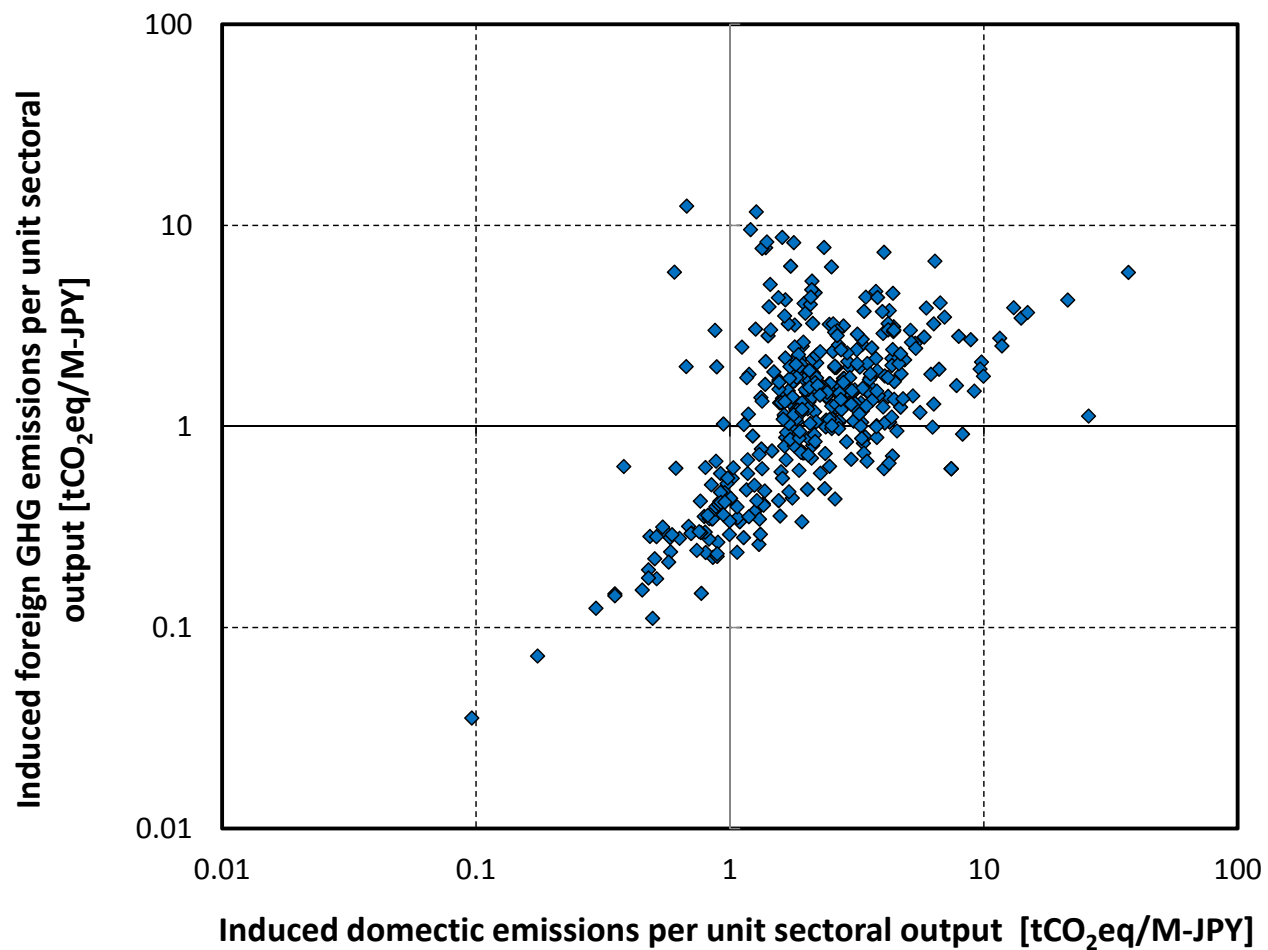

Enlargement of Figure 2 (e) in the main text.  $R^2$  is 0.05 for  $y = 0.1215x + 1.3829$  and 0.0554 for  $y = -0.0031x^2 + 0.1934x + 1.2354$ .

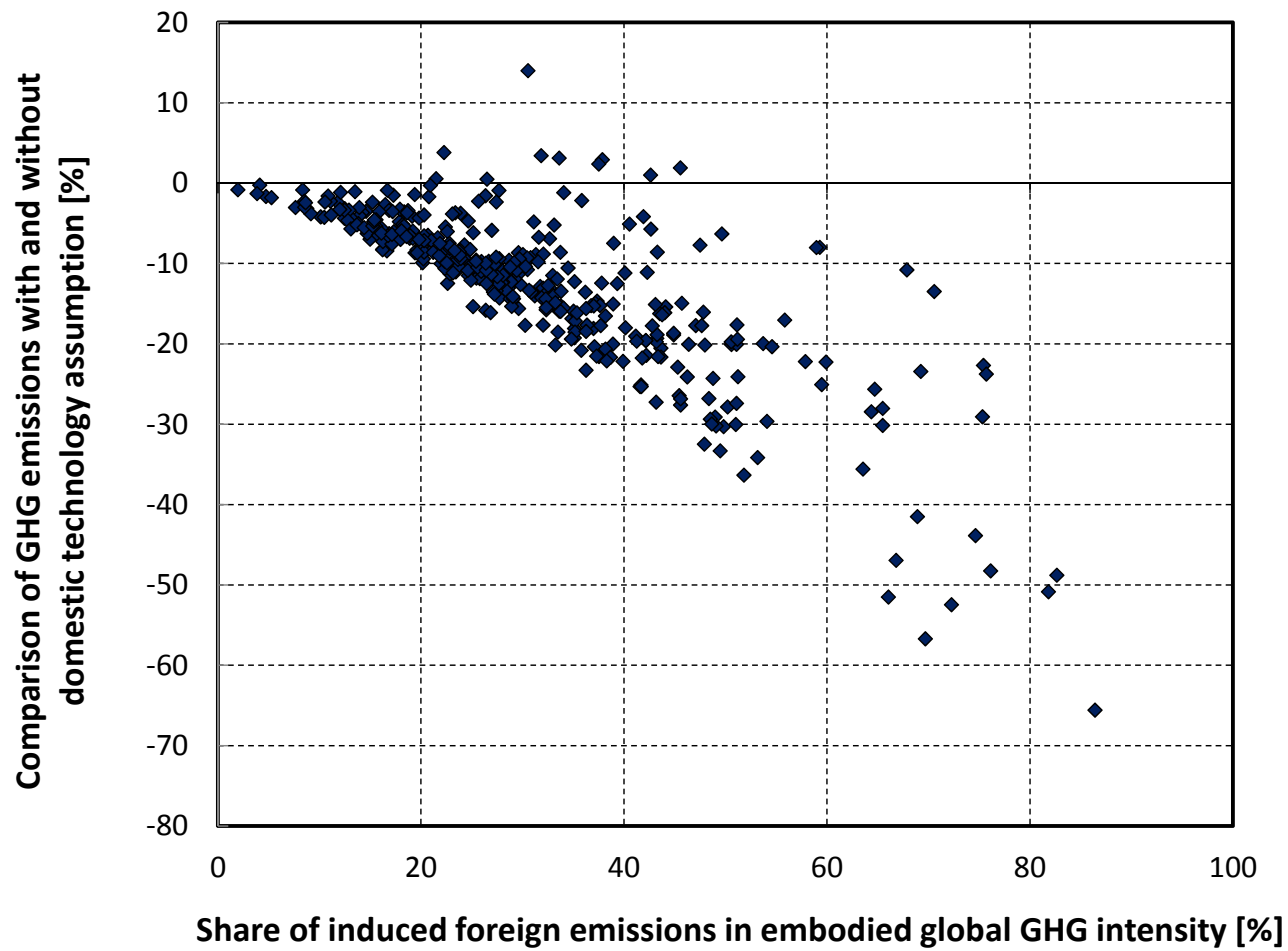

Enlargement of Figure 2 (f) in the main text.  $R^2$  is 0.6532 for  $y = -0.5286x + 3.8819$  and 0.6654 for  $y = -0.0033x^2 - 0.2721x - 0.1341$ .



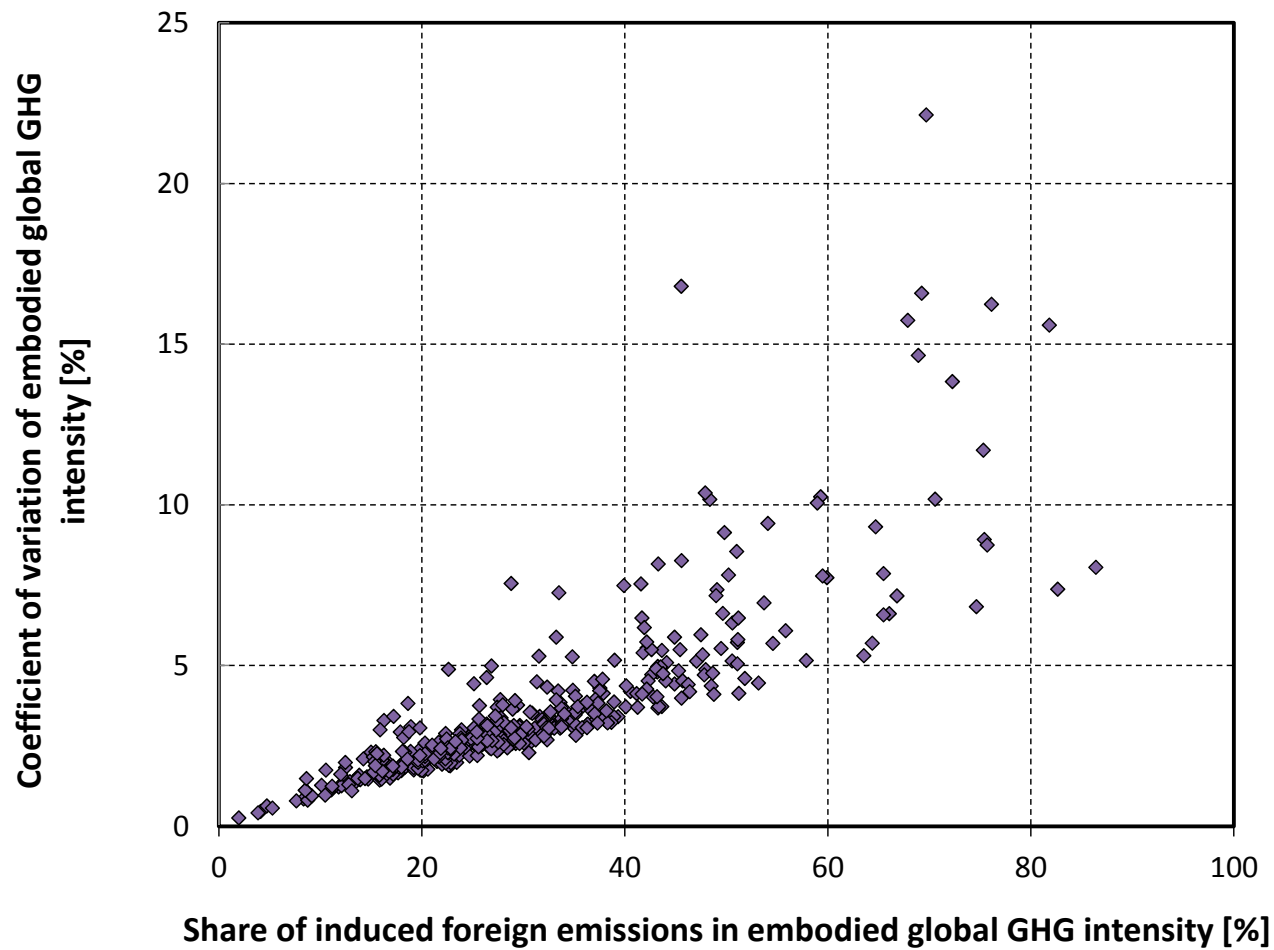

Enlargement of Figure 2 (g) in the main text.  $R^2$  is 0.6748 for  $y = 0.1444x - 0.8171$  and 0.6938 for  $y = 0.0011x^2 + 0.0584x + 0.5297$ .

## References

1. 3EID *Embodied Energy and Emission Intensity Data for Japan Using Input-Output Tables (3EID)*; Center for Global Environmental Research, National Institute for Environmental Studies: Ibaraki, 2002.
2. Lenzen, M.; Murray, J.; Sack, F.; Wiedmann, T., Shared producer and consumer responsibility - Theory and practice. *Ecological Economics* 2007, *61*, (1), 27-42.
3. Peters, G. P., From production-based to consumption-based national emission inventories. *Ecological Economics* 2008, *65*, (1), 13-23.
4. Nansai, K.; Kagawa, S.; Kondo, Y.; Suh, S.; Nakajima, K.; Inaba, R.; Oshita, Y.; Morimoto, T.; Kawashima, K.; Terakawa, T.; Tohno, S., Characterization of economic requirements for a "carbon-debt-free country". *Environmental Science & Technology* 2012, *46*, (1), 155-163.
5. Initiative, T. G. P. Product and Supply Chain. <http://www.ghgprotocol.org/> (04/15),
6. Standardization, I. O. f. GHG -- Quantification and reporting of GHG emissions for organizations (Carbonfootprint of organization) -- Guidance for the application of ISO 14064-1. [http://www.iso.org/iso/iso\\_catalogue/catalogue\\_tc/catalogue\\_detail.htm?csnumber=43280](http://www.iso.org/iso/iso_catalogue/catalogue_tc/catalogue_detail.htm?csnumber=43280)
7. Inaba, R.; Nansai, K.; Fujii, M.; Hashimoto, S., Hybrid life-cycle assessment (LCA) of CO<sub>2</sub> emission with management alternatives for household food wastes in Japan. *Waste Manage Res* 2010, *28*, (6), 496-507.
8. Nakamura, S.; Yamasue, E., Hybrid LCA of a Design for Disassembly Technology: Active Disassembling Fasteners of Hydrogen Storage Alloys for Home Appliances. *Environmental Science & Technology* 2010, *44*, (12), 4402-4408.
9. Kagawa, S.; Nansai, K.; Kondo, Y.; Hubacek, K.; Suh, S.; Minx, J.; Kudoh, Y.; Tasaki, T.; Nakamura, S., Role of Motor Vehicle Lifetime Extension in Climate Change Policy. *Environmental Science & Technology* 2011, *45*, (4), 1184-1191.

# Appendix

**Table A1: Embodied global energy intensities of Japanese goods and services based on producer price in 2005: Unit: gigajoule (net calorific value basis) per one million Yen (M-JPY)**

**Table A2: Embodied global GHG intensities of Japanese goods and services based on producer price in 2005: Unit: tCO<sub>2</sub>eq/M-JPY**

**Table A3: Embodied global CO<sub>2</sub> intensities of Japanese goods and services based on producer price in 2005: Unit: tCO<sub>2</sub>/M-JPY**

**Table A4: Embodied global CH<sub>4</sub> intensities of Japanese goods and services based on producer price in 2005: Unit: tCO<sub>2</sub>eq/M-JPY**

**Table A5: Embodied global N<sub>2</sub>O intensities of Japanese goods and services based on producer price in 2005: Unit: tCO<sub>2</sub>eq/M-JPY**

**Table A6: Embodied global PFC intensities of Japanese goods and services based on producer price in 2005: Unit: tCO<sub>2</sub>eq/M-JPY**

**Table A7: Embodied global HFC intensities of Japanese goods and services based on producer price in 2005: Unit: tCO<sub>2</sub>eq/M-JPY**

**Table A8: Embodied global SF<sub>6</sub> intensities of Japanese goods and services based on producer price in 2005: Unit: tCO<sub>2</sub>eq/M-JPY**

**Table A9: Embodied global NO<sub>x</sub> intensities of Japanese goods and services based on producer price in 2005: Unit: kg/M-JPY**

**Table A10: Embodied global SO<sub>x</sub> intensities of Japanese goods and services based on producer price in 2005: Unit: kg/M-JPY**

**All the above global intensities in Unicode Text (.txt) format are also available in the SI.**

Table A1: Embodied global energy intensities of Japanese goods and services based on producer price in 2005 [1/5]

| Sector no. | Sector code | Sector name<br>[Japanese domestic commodity]                                 | Sector name in Japanese<br>[Japanese domestic commodity] | Embodied global energy intensities based on producer price in 2005 |                                               |                                                        |                                                     |                                             |
|------------|-------------|------------------------------------------------------------------------------|----------------------------------------------------------|--------------------------------------------------------------------|-----------------------------------------------|--------------------------------------------------------|-----------------------------------------------------|---------------------------------------------|
|            |             |                                                                              |                                                          | Total                                                              | (D) Direct<br>consumptions in<br>Japan during | (S) Induced<br>consumptions in<br>Japan through supply | (F) Induced<br>consumptions in<br>foreign country's | Coefficient of variance<br>of the intensity |
|            |             |                                                                              |                                                          |                                                                    |                                               |                                                        |                                                     |                                             |
| JD1        | 011101      | Rice                                                                         | 米                                                        | 3.26E+1                                                            | 3.58E+0                                       | 2.19E+1                                                | 7.17E+0                                             | 1.94E+0                                     |
| JD2        | 011102      | Wheat, barley and the like                                                   | 麦類                                                       | 4.22E+1                                                            | 2.61E+0                                       | 2.90E+1                                                | 1.06E+1                                             | 2.03E+0                                     |
| JD3        | 011201      | Potatoes and sweet potatoes                                                  | いも類                                                      | 3.00E+1                                                            | 2.42E+0                                       | 1.99E+1                                                | 7.64E+0                                             | 2.21E+0                                     |
| JD4        | 011202      | Pulses                                                                       | 豆類                                                       | 3.20E+1                                                            | 1.63E+0                                       | 2.27E+1                                                | 7.64E+0                                             | 2.05E+0                                     |
| JD5        | 011301      | Vegetables                                                                   | 野菜                                                       | 4.45E+1                                                            | 1.62E+1                                       | 2.02E+1                                                | 8.17E+0                                             | 1.82E+0                                     |
| JD6        | 011401      | Fruits                                                                       | 果実                                                       | 3.71E+1                                                            | 1.12E+1                                       | 1.74E+1                                                | 8.53E+0                                             | 1.94E+0                                     |
| JD7        | 011501      | Sugar crops                                                                  | 砂糖原料作物                                                   | 3.56E+1                                                            | 2.38E+0                                       | 2.33E+1                                                | 9.94E+0                                             | 2.24E+0                                     |
| JD8        | 011502      | Crops for beverages                                                          | 飲料用作物                                                    | 4.15E+1                                                            | 4.10E-1                                       | 3.02E+1                                                | 1.09E+1                                             | 1.98E+0                                     |
| JD9        | 011509      | Other edible crops                                                           | その他の食用耕種作物                                               | 3.46E+1                                                            | 4.48E+0                                       | 2.20E+1                                                | 8.17E+0                                             | 2.09E+0                                     |
| JD10       | 011601      | Crops for feed and forage                                                    | 飼料作物                                                     | 2.68E+1                                                            | 1.26E+0                                       | 1.55E+1                                                | 1.00E+1                                             | 3.39E+0                                     |
| JD11       | 011602      | Seeds and seedlings                                                          | 種苗                                                       | 2.93E+1                                                            | 8.36E-1                                       | 1.45E+1                                                | 1.40E+1                                             | 1.10E+1                                     |
| JD12       | 011603      | Flowers and plants                                                           | 花き・花木類                                                   | 1.07E+2                                                            | 6.79E+1                                       | 2.66E+1                                                | 1.21E+1                                             | 1.64E+0                                     |
| JD13       | 011609      | Other inedible crops                                                         | その他の非食用耕種作物                                              | 2.06E+1                                                            | 2.73E+0                                       | 1.27E+1                                                | 5.18E+0                                             | 2.24E+0                                     |
| JD14       | 012101      | Dairy cattle farming                                                         | 酪農                                                       | 3.15E+1                                                            | 1.89E+0                                       | 1.80E+1                                                | 1.16E+1                                             | 3.57E+0                                     |
| JD15       | 012102      | Hen eggs                                                                     | 鶏卵                                                       | 3.81E+1                                                            | 6.51E-1                                       | 2.26E+1                                                | 1.49E+1                                             | 3.65E+0                                     |
| JD16       | 012103      | Fowls and broilers                                                           | 肉鶏                                                       | 4.80E+1                                                            | 1.01E+0                                       | 3.02E+1                                                | 1.67E+1                                             | 3.21E+0                                     |
| JD17       | 012104      | Hogs                                                                         | 豚                                                        | 4.13E+1                                                            | 6.18E-1                                       | 2.62E+1                                                | 1.44E+1                                             | 3.25E+0                                     |
| JD18       | 012105      | Beef cattle                                                                  | 肉用牛                                                      | 3.81E+1                                                            | 2.43E-1                                       | 2.40E+1                                                | 1.38E+1                                             | 3.39E+0                                     |
| JD19       | 012109      | Other livestock                                                              | その他の畜産                                                   | 3.64E+1                                                            | 1.34E+0                                       | 2.13E+1                                                | 1.38E+1                                             | 3.27E+0                                     |
| JD20       | 013101      | Veterinary service                                                           | 獣医薬業                                                     | 1.86E+1                                                            | 6.02E-1                                       | 1.26E+1                                                | 5.42E+0                                             | 2.44E+0                                     |
| JD21       | 013102      | Agricultural services (except veterinary service)                            | 農業サービス (除獣医薬業)                                           | 4.73E+1                                                            | 8.62E+0                                       | 3.06E+1                                                | 8.11E+0                                             | 1.56E+0                                     |
| JD22       | 021101      | Silviculture                                                                 | 育林                                                       | 6.58E+0                                                            | 1.03E+0                                       | 4.04E+0                                                | 1.51E+0                                             | 2.57E+0                                     |
| JD23       | 021201      | Logs                                                                         | 素材                                                       | 2.70E+1                                                            | 5.68E+0                                       | 1.41E+1                                                | 7.16E+0                                             | 2.76E+0                                     |
| JD24       | 021301      | Special forest products (inc. hunting)                                       | 特用林産物(含狩猟業)                                              | 7.68E+1                                                            | 2.88E+1                                       | 3.71E+1                                                | 1.09E+1                                             | 1.78E+0                                     |
| JD25       | 031101      | Marine fisheries                                                             | 海面漁業                                                     | 1.31E+2                                                            | 1.03E+2                                       | 1.60E+1                                                | 1.23E+1                                             | 1.53E+0                                     |
| JD26       | 031104      | Marine culture                                                               | 海面養殖業                                                    | 6.42E+1                                                            | 2.30E+1                                       | 2.83E+1                                                | 1.28E+1                                             | 1.92E+0                                     |
| JD27       | 0312001     | Inland water fisheries and culture                                           | 内水面漁業・養殖業                                                | 7.88E+1                                                            | 2.61E+1                                       | 3.35E+1                                                | 1.92E+1                                             | 4.92E+0                                     |
| JD28       | 061101      | Metallic ores                                                                | 金属鉱物                                                     | 1.07E+2                                                            | 9.01E+0                                       | 8.63E+1                                                | 1.14E+1                                             | 1.14E+0                                     |
| JD29       | 062101      | Materials for ceramics                                                       | 窯業原料鉱物                                                   | 1.06E+2                                                            | 3.81E+1                                       | 5.56E+1                                                | 1.18E+1                                             | 1.62E+0                                     |
| JD30       | 062201      | Gravel and quarrying                                                         | 砂利・採石                                                    | 7.95E+1                                                            | 7.54E+0                                       | 5.95E+1                                                | 1.25E+1                                             | 2.56E+0                                     |
| JD31       | 062202      | Crushed stones                                                               | 砕石                                                       | 7.72E+1                                                            | 7.75E+0                                       | 5.73E+1                                                | 1.22E+1                                             | 2.39E+0                                     |
| JD32       | 062909      | Other non-metallic ores                                                      | その他の非金属鉱物                                                | 1.37E+2                                                            | 5.79E+1                                       | 6.25E+1                                                | 1.70E+1                                             | 1.77E+0                                     |
| JD33       | 071101      | Coal mining, crude petroleum and natural gas                                 | 石炭・原油・天然ガス                                               | 6.28E+1                                                            | 2.30E+0                                       | 5.34E+1                                                | 7.05E+0                                             | 1.01E+0                                     |
| JD34       | 0711011     | Coal mining                                                                  | 石炭                                                       | 6.28E+1                                                            | 0.00E+0                                       | 5.57E+1                                                | 7.05E+0                                             | 1.01E+0                                     |
| JD35       | 0711012     | Crude petroleum                                                              | 原油                                                       | 6.28E+1                                                            | 0.00E+0                                       | 5.57E+1                                                | 7.05E+0                                             | 1.01E+0                                     |
| JD36       | 0711013     | Natural gas                                                                  | 天然ガス                                                     | 6.28E+1                                                            | 0.00E+0                                       | 5.57E+1                                                | 7.05E+0                                             | 1.01E+0                                     |
| JD37       | 111101      | Slaughtering and meat processing                                             | と畜(含肉鶏処理)                                                | 3.77E+1                                                            | 2.40E-2                                       | 2.47E+1                                                | 1.29E+1                                             | 3.15E+0                                     |
| JD38       | 111201      | Processed meat products                                                      | 肉加工品                                                     | 4.65E+1                                                            | 3.32E+0                                       | 1.54E+1                                                | 2.78E+1                                             | 6.66E+0                                     |
| JD39       | 111202      | Bottled or canned meat products                                              | 畜産びん・かん詰                                                 | 4.16E+1                                                            | 6.91E+0                                       | 2.21E+1                                                | 1.27E+1                                             | 2.66E+0                                     |
| JD40       | 111203      | Dairy farm products                                                          | 酪農品                                                      | 4.93E+1                                                            | 9.57E+0                                       | 2.81E+1                                                | 1.17E+1                                             | 2.11E+0                                     |
| JD41       | 111301      | Frozen fish and shellfish                                                    | 冷凍魚介類                                                    | 7.71E+1                                                            | 2.42E+0                                       | 6.36E+1                                                | 1.10E+1                                             | 1.59E+0                                     |
| JD42       | 111302      | Salted, dried or smoked seafood                                              | 塩・干・くん製品                                                 | 6.15E+1                                                            | 4.85E+0                                       | 3.60E+1                                                | 2.07E+1                                             | 2.76E+0                                     |
| JD43       | 111303      | Bottled or canned seafood                                                    | 水産びん・かん詰                                                 | 6.08E+1                                                            | 1.23E+1                                       | 3.43E+1                                                | 1.42E+1                                             | 1.91E+0                                     |
| JD44       | 111304      | Fish paste                                                                   | わり製品                                                     | 5.13E+1                                                            | 6.43E+0                                       | 2.69E+1                                                | 1.80E+1                                             | 2.69E+0                                     |
| JD45       | 111309      | Other processed seafood                                                      | その他の水産食品                                                 | 4.92E+1                                                            | 3.09E+0                                       | 3.15E+1                                                | 1.45E+1                                             | 2.44E+0                                     |
| JD46       | 111401      | Grain milling                                                                | 精穀                                                       | 3.17E+1                                                            | 4.50E-1                                       | 2.48E+1                                                | 6.50E+0                                             | 1.91E+0                                     |
| JD47       | 111402      | Flour and other grain milled products                                        | 製粉                                                       | 5.25E+1                                                            | 8.77E+0                                       | 2.21E+1                                                | 2.16E+1                                             | 5.26E+0                                     |
| JD48       | 111501      | Noodles                                                                      | めん類                                                      | 4.87E+1                                                            | 9.31E+0                                       | 2.54E+1                                                | 1.39E+1                                             | 2.47E+0                                     |
| JD49       | 111502      | Bread                                                                        | パン類                                                      | 3.99E+1                                                            | 5.53E+0                                       | 2.27E+1                                                | 1.16E+1                                             | 2.46E+0                                     |
| JD50       | 111503      | Confectionery                                                                | 菓子類                                                      | 4.21E+1                                                            | 5.53E+0                                       | 2.34E+1                                                | 1.32E+1                                             | 2.61E+0                                     |
| JD51       | 111601      | Bottled or canned vegetables and fruits                                      | 農産びん・かん詰                                                 | 5.46E+1                                                            | 7.48E+0                                       | 3.14E+1                                                | 1.57E+1                                             | 2.17E+0                                     |
| JD52       | 111602      | Preserved agricultural foodstuffs (other than bottled or canned)             | 農産保存食料品(除びん・かん詰)                                         | 3.80E+1                                                            | 4.29E+0                                       | 2.29E+1                                                | 1.08E+1                                             | 2.19E+0                                     |
| JD53       | 111701      | Sugar                                                                        | 砂糖                                                       | 1.09E+2                                                            | 5.30E+1                                       | 2.96E+1                                                | 2.61E+1                                             | 3.61E+0                                     |
| JD54       | 111702      | Starch                                                                       | でん粉                                                      | 6.99E+1                                                            | 2.69E+1                                       | 2.37E+1                                                | 1.93E+1                                             | 3.33E+0                                     |
| JD55       | 111703      | Dextrose, syrup and isomerized sugar                                         | ぶどう糖・水あめ・異性化糖                                            | 1.12E+2                                                            | 3.64E+1                                       | 5.80E+1                                                | 1.75E+1                                             | 1.51E+0                                     |
| JD56       | 111704      | Vegetable oils and meal                                                      | 植物油脂                                                     | 6.56E+1                                                            | 1.73E+1                                       | 2.09E+1                                                | 2.74E+1                                             | 4.40E+0                                     |
| JD57       | 111705      | Animal oils and fats                                                         | 動物油脂                                                     | 8.98E+1                                                            | 3.55E+1                                       | 3.99E+1                                                | 1.43E+1                                             | 1.42E+0                                     |
| JD58       | 111706      | Condiments and seasonings                                                    | 調味料                                                      | 4.50E+1                                                            | 5.99E+0                                       | 2.61E+1                                                | 1.29E+1                                             | 2.24E+0                                     |
| JD59       | 111901      | Prepared frozen foods                                                        | 冷凍調理食品                                                   | 5.30E+1                                                            | 1.09E+1                                       | 2.60E+1                                                | 1.61E+1                                             | 2.43E+0                                     |
| JD60       | 111902      | Retort foods                                                                 | レトルト食品                                                   | 5.21E+1                                                            | 1.11E+1                                       | 2.31E+1                                                | 1.79E+1                                             | 2.55E+0                                     |
| JD61       | 111903      | Dishes, sushi and lunch boxes                                                | そう菜・すし・弁当                                                | 4.40E+1                                                            | 6.57E+0                                       | 2.27E+1                                                | 1.47E+1                                             | 2.62E+0                                     |
| JD62       | 111904      | School lunch (public) **                                                     | 学校給食(国公立)★                                               | 3.47E+1                                                            | 6.75E+0                                       | 1.89E+1                                                | 9.08E+0                                             | 2.10E+0                                     |
| JD63       | 111905      | School lunch (private) *                                                     | 学校給食(私立)★                                                | 3.35E+1                                                            | 4.60E+0                                       | 1.95E+1                                                | 9.42E+0                                             | 2.22E+0                                     |
| JD64       | 111909      | Other foods                                                                  | その他の食料品                                                  | 5.33E+1                                                            | 1.41E+1                                       | 2.69E+1                                                | 1.23E+1                                             | 1.94E+0                                     |
| JD65       | 112101      | Refined sake                                                                 | 清酒                                                       | 3.03E+1                                                            | 4.39E+0                                       | 2.07E+1                                                | 5.24E+0                                             | 1.55E+0                                     |
| JD66       | 112102      | Beer                                                                         | ビール                                                      | 2.44E+1                                                            | 5.46E+0                                       | 1.36E+1                                                | 5.31E+0                                             | 1.72E+0                                     |
| JD67       | 112103      | Whiskey and brandy                                                           | ウイスキー類                                                   | 2.98E+1                                                            | 6.05E+0                                       | 1.74E+1                                                | 6.42E+0                                             | 1.78E+0                                     |
| JD68       | 112109      | Other liquors                                                                | その他の酒類                                                   | 3.21E+1                                                            | 6.94E+0                                       | 1.74E+1                                                | 7.75E+0                                             | 1.96E+0                                     |
| JD69       | 112901      | Tea and roasted coffee                                                       | 茶・コーヒー                                                   | 4.13E+1                                                            | 3.18E+0                                       | 2.29E+1                                                | 1.52E+1                                             | 2.31E+0                                     |
| JD70       | 112902      | Soft drinks                                                                  | 清涼飲料                                                     | 3.91E+1                                                            | 4.48E+0                                       | 2.35E+1                                                | 1.10E+1                                             | 2.09E+0                                     |
| JD71       | 112903      | Manufactured ice                                                             | 製氷                                                       | 7.57E+1                                                            | 8.66E-1                                       | 6.75E+1                                                | 7.41E+0                                             | 8.95E-1                                     |
| JD72       | 113101      | Animal feed                                                                  | 飼料                                                       | 4.64E+1                                                            | 4.71E+0                                       | 1.78E+1                                                | 2.39E+1                                             | 5.15E+0                                     |
| JD73       | 113102      | Organic fertilizers, n.e.c.                                                  | 有機質肥料(除別掲)                                               | 4.44E+1                                                            | 9.53E+0                                       | 2.02E+1                                                | 1.47E+1                                             | 2.63E+0                                     |
| JD74       | 114101      | Tobacco                                                                      | たばこ                                                      | 1.01E+1                                                            | 4.32E-1                                       | 6.38E+0                                                | 3.33E+0                                             | 3.76E+0                                     |
| JD75       | 151101      | Fiber yarns                                                                  | 紡績糸                                                      | 7.84E+1                                                            | 5.51E+0                                       | 3.90E+1                                                | 3.39E+1                                             | 5.76E+0                                     |
| JD76       | 151201      | Cotton and staple fiber fabrics (inc. fabrics of synthetic spun fibers)      | 綿・スフ織物(含合繊短繊維織物)                                         | 9.55E+1                                                            | 6.20E+0                                       | 5.64E+1                                                | 3.29E+1                                             | 2.52E+0                                     |
| JD77       | 151202      | Silk and artificial silk fabrics (inc. fabrics of synthetic filament fibers) | 絹・人絹織物(含合繊長繊維織物)                                         | 8.91E+1                                                            | 5.11E+0                                       | 6.35E+1                                                | 2.05E+1                                             | 2.12E+0                                     |
| JD78       | 151203      | Woolen fabrics, hemp fabrics and other fabrics                               | 毛織物・麻織物・その他の織物                                           | 8.64E+1                                                            | 2.02E+0                                       | 6.01E+1                                                | 2.43E+1                                             | 2.17E+0                                     |
| JD79       | 151301      | Knitting fabrics                                                             | ニット生地                                                    | 6.79E+1                                                            | 1.94E+0                                       | 3.70E+1                                                | 2.90E+1                                             | 4.26E+0                                     |
| JD80       | 151401      | Yarn and fabric dyeing and finishing (processing on commission only)         | 染色整理                                                     | 1.25E+2                                                            | 6.38E+1                                       | 3.99E+1                                                | 2.09E+1                                             | 1.35E+0                                     |
| JD81       | 151901      | Ropes and nets                                                               | 綱・網                                                      | 7.01E+1                                                            | 3.88E+0                                       | 5.03E+1                                                | 1.60E+1                                             | 2.23E+0                                     |
| JD82       | 151902      | Carpets and floor mats                                                       | じゅうたん・床敷物                                                | 7.78E+1                                                            | 5.65E+0                                       | 5.12E+1                                                | 2.09E+1                                             | 2.24E+0                                     |
| JD83       | 151903      | Fabricated textiles for medical use                                          | 繊維製衛生材料                                                  | 5.84E+1                                                            | 5.11E+0                                       | 3.97E+1                                                | 1.35E+1                                             | 2.72E+0                                     |
| JD84       | 151909      | Other fabricated textile products                                            | その他の繊維工業製品                                               | 7.52E+1                                                            | 7.89E+0                                       | 5.01E+1                                                | 1.73E+1                                             | 1.99E+0                                     |
| JD85       | 152101      | Woven fabric apparel                                                         | 織物製衣服                                                    | 5.21E+1                                                            | 7.14E-1                                       | 3.01E+1                                                | 2.12E+1                                             | 3.18E+0                                     |
| JD86       | 152102      | Knitted apparel                                                              | ニット製衣服                                                   | 5.99E+1                                                            | 1.79E+0                                       | 4.13E+1                                                | 1.68E+1                                             | 2.47E+0                                     |
| JD87       | 152209      | Other wearing apparel and clothing accessories                               | その他の衣服・身の回り品                                             | 6.07E+1                                                            | 6.70E+0                                       | 3.58E+1                                                | 1.82E+1                                             | 2.29E+0                                     |
| JD88       | 152901      | Bedding                                                                      | 寝具                                                       | 4.29E+1                                                            | 1.10E+0                                       | 2.37E+1                                                | 1.81E+1                                             | 3.26E+0                                     |
| JD89       | 152909      | Other ready-made textile products                                            | その他の繊維既製品                                                | 5.02E+1                                                            | 1.69E+0                                       | 3.08E+1                                                | 1.77E+1                                             | 2.72E+0                                     |
| JD90       | 161101      | Timber                                                                       | 製材                                                       | 4.85E+1                                                            | 2.15E+0                                       | 1.61E+1                                                | 3.02E+1                                             | 4.83E+0                                     |
| JD91       | 161102      | Plywood                                                                      | 合板                                                       | 5.56E+1                                                            | 3.56E+0                                       | 2.79E+1                                                | 2.41E+1                                             | 3.10E+0                                     |
| JD92       | 161103      | Wooden chips                                                                 | 木材チップ                                                    | 3.67E+1                                                            | 2.69E+0                                       | 2.42E+1                                                | 9.77E+0                                             | 2.13E+0                                     |
| JD93       | 161909      | Other wooden products                                                        | その他の木製品                                                  | 3.80E+1                                                            | 1.47E+0                                       | 2.35E+1                                                | 1.31E+1                                             | 2.48E+0                                     |

Table A1: Embodied global energy intensities of Japanese goods and services based on producer price in 2005 [2/5]

| Sector no. | Sector code | Sector name<br>[Japanese domestic commodity]             | Sector name in Japanese<br>[Japanese domestic commodity] | Embodied global energy intensities based on producer price in 2005 |                                               |                                                        |                                                     |                                             |
|------------|-------------|----------------------------------------------------------|----------------------------------------------------------|--------------------------------------------------------------------|-----------------------------------------------|--------------------------------------------------------|-----------------------------------------------------|---------------------------------------------|
|            |             |                                                          |                                                          | Total                                                              | (D) Direct<br>consumptions in<br>Japan during | (S) Induced<br>consumptions in<br>Japan through supply | (F) Induced<br>consumptions in<br>foreign country's | Coefficient of variance<br>of the intensity |
|            |             |                                                          |                                                          |                                                                    |                                               |                                                        |                                                     |                                             |
| JD94       | 171101      | Wooden furniture and fixtures                            | 木製家具・装備品                                                 | 4.14E+1                                                            | 2.34E+0                                       | 2.32E+1                                                | 1.59E+1                                             | 2.74E+0                                     |
| JD95       | 171102      | Wooden fixtures                                          | 木製建具                                                     | 4.18E+1                                                            | 3.31E+0                                       | 2.59E+1                                                | 1.26E+1                                             | 2.18E+0                                     |
| JD96       | 171103      | Metallic furniture and fixture                           | 金属製家具・装備品                                                | 6.17E+1                                                            | 2.74E+0                                       | 4.27E+1                                                | 1.63E+1                                             | 2.00E+0                                     |
| JD97       | 181101      | Pulp                                                     | パルプ                                                      | 3.55E+2                                                            | 2.37E+2                                       | 7.74E+1                                                | 4.03E+1                                             | 1.30E+0                                     |
| JD98       | 181201      | Paper                                                    | 洋紙・和紙                                                    | 2.56E+2                                                            | 8.39E+1                                       | 1.49E+2                                                | 2.34E+1                                             | 7.59E-1                                     |
| JD99       | 181202      | Paperboard                                               | 板紙                                                       | 2.16E+2                                                            | 3.99E+1                                       | 1.54E+2                                                | 2.25E+1                                             | 9.18E-1                                     |
| JD100      | 181301      | Corrugated cardboard                                     | 段ボール                                                     | 1.18E+2                                                            | 2.58E+0                                       | 1.01E+2                                                | 1.49E+1                                             | 1.07E+0                                     |
| JD101      | 181302      | Coated paper and building (construction) paper           | 塗工紙・建設用加工紙                                               | 9.09E+1                                                            | 8.33E+0                                       | 7.01E+1                                                | 1.24E+1                                             | 1.18E+0                                     |
| JD102      | 182101      | Corrugated card board boxes                              | 段ボール箱                                                    | 5.57E+1                                                            | 1.90E+0                                       | 4.60E+1                                                | 7.84E+0                                             | 1.24E+0                                     |
| JD103      | 182109      | Other paper containers                                   | その他の紙製容器                                                 | 7.37E+1                                                            | 3.50E+0                                       | 5.02E+1                                                | 2.01E+1                                             | 2.92E+0                                     |
| JD104      | 182901      | Paper textile for medical use                            | 紙製衛生材料・用品                                                | 7.48E+1                                                            | 8.16E+0                                       | 5.27E+1                                                | 1.39E+1                                             | 1.60E+0                                     |
| JD105      | 182909      | Other pulp, paper and processed paper products           | その他のパルプ・紙・紙加工品                                           | 7.00E+1                                                            | 4.39E+0                                       | 5.52E+1                                                | 1.03E+1                                             | 1.21E+0                                     |
| JD106      | 191101      | Printing, plate making and book binding                  | 印刷・製版・製本                                                 | 4.95E+1                                                            | 2.38E+0                                       | 3.88E+1                                                | 8.40E+0                                             | 1.33E+0                                     |
| JD107      | 201101      | Chemical fertilizer                                      | 化学肥料                                                     | 1.25E+2                                                            | 4.65E+1                                       | 3.87E+1                                                | 3.96E+1                                             | 2.37E+0                                     |
| JD108      | 202101      | Industrial soda chemicals                                | ソーダ工業製品                                                  | 2.66E+2                                                            | 3.91E+1                                       | 1.81E+2                                                | 4.62E+1                                             | 3.22E+0                                     |
| JD109      | 202901      | Inorganic pigment                                        | 無機顔料                                                     | 1.24E+2                                                            | 2.36E+1                                       | 6.54E+1                                                | 3.47E+1                                             | 2.16E+0                                     |
| JD110      | 202902      | Compressed gas and liquefied gas                         | 圧縮ガス・液化ガス                                                | 1.76E+2                                                            | 1.12E+1                                       | 1.48E+2                                                | 1.67E+1                                             | 7.83E-1                                     |
| JD111      | 202903      | Salt                                                     | 塩                                                        | 1.71E+2                                                            | 9.39E+1                                       | 3.49E+1                                                | 4.21E+1                                             | 4.97E+0                                     |
| JD112      | 202909      | Other industrial inorganic chemicals                     | その他の無機化学工業製品                                             | 1.53E+2                                                            | 6.26E+1                                       | 5.45E+1                                                | 3.60E+1                                             | 1.77E+0                                     |
| JD113      | 203101      | Petrochemical basic products                             | 石油化学基礎製品                                                 | 1.46E+2                                                            | 2.42E+1                                       | 3.51E+1                                                | 8.67E+1                                             | 1.00E+1                                     |
| JD114      | 203102      | Petrochemical aromatic products (except synthetic resin) | 石油化学系芳香族製品                                               | 1.30E+2                                                            | 2.54E+1                                       | 3.04E+1                                                | 7.43E+1                                             | 9.59E+0                                     |
| JD115      | 203201      | Aliphatic intermediates                                  | 脂肪族中間物                                                   | 1.88E+2                                                            | 4.91E+1                                       | 8.59E+1                                                | 5.27E+1                                             | 3.82E+0                                     |
| JD116      | 203202      | Cyclic intermediates                                     | 環式中間物                                                    | 1.37E+2                                                            | 3.58E+1                                       | 4.81E+1                                                | 5.27E+1                                             | 4.91E+0                                     |
| JD117      | 203301      | Synthetic rubber                                         | 合成ゴム                                                     | 2.53E+2                                                            | 1.41E+2                                       | 7.57E+1                                                | 3.58E+1                                             | 2.03E+0                                     |
| JD118      | 203901      | Methane derivatives                                      | メタン誘導品                                                   | 1.93E+2                                                            | 9.66E+1                                       | 6.66E+1                                                | 2.93E+1                                             | 1.19E+0                                     |
| JD119      | 203902      | Oil and fat industrial chemicals                         | 油脂加工製品                                                   | 7.63E+1                                                            | 2.55E+1                                       | 2.96E+1                                                | 2.12E+1                                             | 2.32E+0                                     |
| JD120      | 203903      | Plasticizers                                             | 可塑剤                                                      | 1.19E+2                                                            | 3.34E+1                                       | 5.23E+1                                                | 3.36E+1                                             | 2.16E+0                                     |
| JD121      | 203904      | Synthetic dyes                                           | 合成染料                                                     | 1.79E+2                                                            | 9.53E+1                                       | 5.41E+1                                                | 2.97E+1                                             | 1.26E+0                                     |
| JD122      | 203909      | Other industrial organic chemicals                       | その他の有機化学工業製品                                             | 1.19E+2                                                            | 2.35E+1                                       | 6.60E+1                                                | 2.95E+1                                             | 2.17E+0                                     |
| JD123      | 204101      | Thermo-setting resins                                    | 熱硬化性樹脂                                                   | 9.79E+1                                                            | 9.85E+0                                       | 5.43E+1                                                | 3.37E+1                                             | 3.35E+0                                     |
| JD124      | 204102      | Thermoplastics resins                                    | 熱可塑性樹脂                                                   | 1.21E+2                                                            | 1.25E+1                                       | 5.86E+1                                                | 4.97E+1                                             | 6.12E+0                                     |
| JD125      | 204103      | High function resins                                     | 高機能性樹脂                                                   | 1.01E+2                                                            | 7.37E+0                                       | 5.96E+1                                                | 3.41E+1                                             | 3.51E+0                                     |
| JD126      | 204109      | Other resins                                             | その他の合成樹脂                                                 | 1.00E+2                                                            | 8.52E+0                                       | 5.81E+1                                                | 3.39E+1                                             | 3.48E+0                                     |
| JD127      | 205101      | Rayon and acetate                                        | レーヨン・アセテート                                               | 2.06E+2                                                            | 1.23E+2                                       | 6.03E+1                                                | 2.31E+1                                             | 9.47E-1                                     |
| JD128      | 205102      | Synthetic fibers                                         | 合成繊維                                                     | 1.42E+2                                                            | 4.26E+1                                       | 7.20E+1                                                | 2.73E+1                                             | 1.98E+0                                     |
| JD129      | 206101      | Medicaments                                              | 医薬品                                                      | 3.81E+1                                                            | 3.56E+0                                       | 2.44E+1                                                | 1.01E+1                                             | 2.08E+0                                     |
| JD130      | 207101      | Soap, synthetic detergents and surface active agents     | 石けん・合成洗剤・界面活性剤                                           | 6.99E+1                                                            | 1.41E+1                                       | 3.52E+1                                                | 2.06E+1                                             | 2.27E+0                                     |
| JD131      | 207102      | Cosmetics, toilet preparations and dentifrices           | 化粧品・歯磨                                                   | 4.79E+1                                                            | 1.61E+0                                       | 3.42E+1                                                | 1.22E+1                                             | 2.08E+0                                     |
| JD132      | 207201      | Paint and varnishes                                      | 塗料                                                       | 7.49E+1                                                            | 3.24E+0                                       | 4.30E+1                                                | 2.87E+1                                             | 3.43E+0                                     |
| JD133      | 207202      | Printing ink                                             | 印刷インキ                                                    | 6.86E+1                                                            | 1.15E+0                                       | 4.08E+1                                                | 2.67E+1                                             | 3.66E+0                                     |
| JD134      | 207301      | Photographic sensitive materials                         | 写真感光材料                                                   | 8.50E+1                                                            | 1.99E+1                                       | 4.34E+1                                                | 2.18E+1                                             | 1.86E+0                                     |
| JD135      | 207401      | Agricultural chemicals                                   | 農薬                                                       | 1.01E+2                                                            | 3.42E+1                                       | 4.79E+1                                                | 1.90E+1                                             | 1.39E+0                                     |
| JD136      | 207901      | Gelatin and adhesives                                    | ゼラチン・接着剤                                                 | 7.85E+1                                                            | 1.72E+1                                       | 3.83E+1                                                | 2.30E+1                                             | 2.68E+0                                     |
| JD137      | 207909      | Other final chemical products                            | その他の化学最終製品                                               | 9.35E+1                                                            | 2.01E+1                                       | 4.65E+1                                                | 2.69E+1                                             | 2.34E+0                                     |
| JD138      | 211101      | Petroleum refinery products (inc. greases)               | 石油製品                                                     | 1.13E+2                                                            | 3.41E+1                                       | 7.77E+0                                                | 7.09E+1                                             | 1.45E+1                                     |
| JD139      | 212101      | Coal products                                            | 石炭製品                                                     | 2.30E+2                                                            | 1.21E+2                                       | 1.81E+1                                                | 9.05E+1                                             | 5.03E+0                                     |
| JD140      | 212102      | Paving materials                                         | 舗装材料                                                     | 5.75E+1                                                            | 3.85E+0                                       | 3.12E+1                                                | 2.24E+1                                             | 7.24E+0                                     |
| JD141      | 221101      | Plastic products                                         | プラスチック製品                                                 | 6.11E+1                                                            | 1.31E+0                                       | 3.69E+1                                                | 2.29E+1                                             | 3.47E+0                                     |
| JD142      | 231101      | Tires and inner tubes                                    | タイヤ・チューブ                                                 | 9.33E+1                                                            | 5.17E+0                                       | 6.17E+1                                                | 2.65E+1                                             | 3.25E+0                                     |
| JD143      | 231901      | Rubber footwear                                          | ゴム製履物                                                    | 4.58E+1                                                            | 1.05E+1                                       | 2.51E+1                                                | 1.03E+1                                             | 2.41E+0                                     |
| JD144      | 231902      | Plastic footwear                                         | プラスチック製履物                                                | 5.70E+1                                                            | 1.17E+1                                       | 3.05E+1                                                | 1.48E+1                                             | 2.11E+0                                     |
| JD145      | 231909      | Other rubber products                                    | その他のゴム製品                                                 | 6.06E+1                                                            | 3.54E+0                                       | 4.14E+1                                                | 1.56E+1                                             | 2.32E+0                                     |
| JD146      | 241101      | Leather footwear                                         | 革製履物                                                     | 3.62E+1                                                            | 1.83E+0                                       | 1.67E+1                                                | 1.76E+1                                             | 3.22E+0                                     |
| JD147      | 241201      | Leather and fur skins                                    | 皮革・毛皮                                                    | 5.55E+1                                                            | 1.12E+1                                       | 1.79E+1                                                | 2.63E+1                                             | 4.61E+0                                     |
| JD148      | 241202      | Miscellaneous leather products                           | かばん・袋物・その他の革製品                                           | 3.96E+1                                                            | 1.60E+0                                       | 2.19E+1                                                | 1.61E+1                                             | 3.04E+0                                     |
| JD149      | 251101      | Sheet glass and safety glass                             | 板ガラス・安全ガラス                                               | 7.45E+1                                                            | 3.29E+1                                       | 2.60E+1                                                | 1.56E+1                                             | 1.65E+0                                     |
| JD150      | 251201      | Glass fiber and glass fiber products, n.e.c.             | ガラス繊維・同製品                                                | 1.37E+2                                                            | 5.55E+1                                       | 6.71E+1                                                | 1.49E+1                                             | 1.08E+0                                     |
| JD151      | 251909      | Other glass products                                     | その他のガラス製品                                                | 8.68E+1                                                            | 4.26E+1                                       | 3.02E+1                                                | 1.40E+1                                             | 1.29E+0                                     |
| JD152      | 252101      | Cement                                                   | セメント                                                     | 6.00E+2                                                            | 4.59E+2                                       | 1.16E+2                                                | 2.50E+1                                             | 3.99E-1                                     |
| JD153      | 252201      | Ready mixed concrete                                     | 生コンクリート                                                  | 1.44E+2                                                            | 3.69E+0                                       | 1.28E+2                                                | 1.20E+1                                             | 8.35E-1                                     |
| JD154      | 252301      | Cement products                                          | セメント製品                                                   | 7.81E+1                                                            | 1.52E+1                                       | 5.31E+1                                                | 9.74E+0                                             | 1.07E+0                                     |
| JD155      | 253101      | Pottery, china and earthenware                           | 陶磁器                                                      | 1.05E+2                                                            | 5.78E+1                                       | 3.04E+1                                                | 1.71E+1                                             | 1.35E+0                                     |
| JD156      | 259901      | Clay refractories                                        | 耐火物                                                      | 1.23E+2                                                            | 3.28E+1                                       | 4.88E+1                                                | 4.15E+1                                             | 2.48E+0                                     |
| JD157      | 259902      | Other structural clay products                           | その他の建設用土石製品                                              | 1.43E+2                                                            | 8.49E+1                                       | 4.01E+1                                                | 1.82E+1                                             | 1.19E+0                                     |
| JD158      | 259903      | Carbon and graphite products                             | 炭素・黒鉛製品                                                  | 1.06E+2                                                            | 3.75E+1                                       | 5.03E+1                                                | 1.82E+1                                             | 1.33E+0                                     |
| JD159      | 259904      | Abrasive                                                 | 研磨材                                                      | 7.81E+1                                                            | 1.68E+1                                       | 2.43E+1                                                | 3.70E+1                                             | 3.47E+0                                     |
| JD160      | 259909      | Miscellaneous ceramic, stone and clay products           | その他の窯業・土石製品                                              | 8.59E+1                                                            | 3.84E+1                                       | 3.18E+1                                                | 1.57E+1                                             | 1.36E+0                                     |
| JD161      | 261101      | Pig iron                                                 | 鉄鉄                                                       | 7.29E+2                                                            | 5.99E+2                                       | 5.44E+1                                                | 7.57E+1                                             | 1.01E+0                                     |
| JD162      | 261102      | Ferro alloys                                             | フェロアロイ                                                   | 2.22E+2                                                            | 1.14E+2                                       | 5.55E+1                                                | 5.25E+1                                             | 2.22E+0                                     |
| JD163      | 261103      | Crude steel (converters)                                 | 粗鋼(転炉)                                                   | 4.49E+2                                                            | 1.34E+1                                       | 3.76E+2                                                | 6.03E+1                                             | 1.16E+0                                     |
| JD164      | 261104      | Crude steel (electric furnaces)                          | 粗鋼(電気炉)                                                  | 1.68E+2                                                            | 1.14E+1                                       | 8.60E+1                                                | 7.05E+1                                             | 5.44E+0                                     |
| JD165      | 261201      | Scrap iron                                               | 鉄屑                                                       | 0.00E+0                                                            | 0.00E+0                                       | 0.00E+0                                                | 0.00E+0                                             | 0.00E+0                                     |
| JD166      | 262101      | Hot rolled steel                                         | 熱間圧延鋼材                                                   | 2.78E+2                                                            | 1.83E+1                                       | 2.16E+2                                                | 4.43E+1                                             | 1.41E+0                                     |
| JD167      | 262201      | Steel pipes and tubes                                    | 鋼管                                                       | 1.94E+2                                                            | 1.43E+1                                       | 1.40E+2                                                | 4.02E+1                                             | 2.03E+0                                     |
| JD168      | 262301      | Cold-finished steel                                      | 冷間仕上鋼材                                                   | 2.25E+2                                                            | 2.52E+1                                       | 1.61E+2                                                | 3.87E+1                                             | 1.49E+0                                     |
| JD169      | 262302      | Coated steel                                             | めっき鋼材                                                    | 1.76E+2                                                            | 1.55E+1                                       | 1.32E+2                                                | 2.91E+1                                             | 1.39E+0                                     |
| JD170      | 263101      | Cast and forged steel                                    | 鍛造鋼                                                      | 1.38E+2                                                            | 1.94E+1                                       | 8.84E+1                                                | 2.98E+1                                             | 2.13E+0                                     |
| JD171      | 263102      | Cast iron pipes and tubes                                | 鑄鉄管                                                      | 1.48E+2                                                            | 6.76E+1                                       | 6.71E+1                                                | 1.32E+1                                             | 7.67E-1                                     |
| JD172      | 263103      | Cast and forged materials (iron)                         | 鑄鉄品及び鍛工品(鉄)                                              | 1.94E+2                                                            | 5.58E+1                                       | 1.19E+2                                                | 1.96E+1                                             | 7.69E-1                                     |
| JD173      | 264901      | Iron and steel shearing and slitting                     | 鉄鋼シャースリット業                                               | 1.60E+2                                                            | 3.49E+0                                       | 1.30E+2                                                | 2.65E+1                                             | 1.41E+0                                     |
| JD174      | 264909      | Other iron or steel products                             | その他の鉄鋼製品                                                 | 1.11E+2                                                            | 7.18E+0                                       | 8.73E+1                                                | 1.69E+1                                             | 1.24E+0                                     |
| JD175      | 271101      | Copper                                                   | 銅                                                        | 1.26E+2                                                            | 1.42E+1                                       | 1.97E+1                                                | 9.17E+1                                             | 8.15E+0                                     |
| JD176      | 271102      | Lead and zinc (inc. regenerated lead)                    | 鉛・亜鉛(含再生)                                                | 1.28E+2                                                            | 1.47E+1                                       | 6.19E+1                                                | 5.16E+1                                             | 3.99E+0                                     |
| JD177      | 271103      | Aluminum (inc. regenerated aluminum)                     | アルミニウム(含再生)                                              | 9.42E+1                                                            | 2.41E+1                                       | 2.75E+1                                                | 4.27E+1                                             | 3.80E+0                                     |
| JD178      | 271109      | Other non-ferrous metals                                 | その他の非鉄金属地金                                               | 1.02E+2                                                            | 3.54E+0                                       | 2.40E+1                                                | 7.46E+1                                             | 8.05E+0                                     |
| JD179      | 271201      | Non-ferrous metal scrap                                  | 非鉄金属屑                                                    | 0.00E+0                                                            | 0.00E+0                                       | 0.00E+0                                                | 0.00E+0                                             | 0.00E+0                                     |
| JD180      | 272101      | Electric wires and cables                                | 電線・ケーブル                                                  | 8.08E+1                                                            | 2.56E+0                                       | 2.97E+1                                                | 4.85E+1                                             | 4.90E+0                                     |
| JD181      | 272102      | Optical fiber cables                                     | 光ファイバケーブル                                                | 8.20E+1                                                            | 3.68E+0                                       | 4.76E+1                                                | 3.07E+1                                             | 2.73E+0                                     |
| JD182      | 272201      | Rolled and drawn copper and copper alloys                | 伸銅品                                                      | 9.40E+1                                                            | 6.69E+0                                       | 3.07E+1                                                | 5.66E+1                                             | 5.88E+0                                     |
| JD183      | 272202      | Rolled and drawn aluminum                                | アルミ圧延製品                                                  | 1.40E+2                                                            | 4.21E+0                                       | 1.81E+1                                                | 1.18E+2                                             | 7.34E+0                                     |
| JD184      | 272203      | Non-ferrous metal castings and forgings                  | 非鉄金属成形材                                                  | 8.96E+1                                                            | 7.67E+0                                       | 2.91E+1                                                | 5.28E+1                                             | 5.00E+0                                     |

Table A1: Embodied global energy intensities of Japanese goods and services based on producer price in 2005 [3/5]

| Sector no. | Sector code | Sector name<br>[Japanese domestic commodity]               | Sector name in Japanese<br>[Japanese domestic commodity] | Embodied global energy intensities based on producer price in 2005 |                                               |                                                        |                                                     |                                             |
|------------|-------------|------------------------------------------------------------|----------------------------------------------------------|--------------------------------------------------------------------|-----------------------------------------------|--------------------------------------------------------|-----------------------------------------------------|---------------------------------------------|
|            |             |                                                            |                                                          | Total                                                              | (D) Direct<br>consumptions in<br>Japan during | (S) Induced<br>consumptions in<br>Japan through supply | (F) Induced<br>consumptions in<br>foreign country's | Coefficient of variance<br>of the intensity |
|            |             |                                                            |                                                          |                                                                    |                                               |                                                        |                                                     |                                             |
| JD185      | 272204      | Nuclear fuels                                              | 核燃料                                                      | 4.95E+1                                                            | 2.03E+0                                       | 1.24E+1                                                | 3.50E+1                                             | 9.05E+0                                     |
| JD186      | 272209      | Other non-ferrous metal products                           | その他の非鉄金属製品                                               | 1.22E+2                                                            | 4.58E+0                                       | 2.08E+1                                                | 9.63E+1                                             | 9.56E+0                                     |
| JD187      | 281101      | Metal products for construction                            | 建設用金属製品                                                  | 9.73E+1                                                            | 2.35E+0                                       | 7.48E+1                                                | 2.02E+1                                             | 1.58E+0                                     |
| JD188      | 281201      | Metal products for architecture                            | 建築用金属製品                                                  | 7.64E+1                                                            | 3.88E+0                                       | 3.91E+1                                                | 3.34E+1                                             | 4.11E+0                                     |
| JD189      | 289101      | Gas and oil appliances and heating and cooking apparatus   | ガス・石油機器及び暖房機器                                            | 7.98E+1                                                            | 3.07E+0                                       | 5.41E+1                                                | 2.26E+1                                             | 2.31E+0                                     |
| JD190      | 289901      | Bolts, nuts, rivets and springs                            | ボルト・ナット・リベット及びスプリング                                      | 8.35E+1                                                            | 4.27E+0                                       | 5.49E+1                                                | 2.43E+1                                             | 3.71E+0                                     |
| JD191      | 289902      | Metal containers, fabricated plate and sheet metal         | 金属製容器及び製缶板金製品                                            | 7.71E+1                                                            | 6.29E+0                                       | 5.26E+1                                                | 1.82E+1                                             | 2.39E+0                                     |
| JD192      | 289903      | Plumber's supplies, powder metallurgy products and tools   | 配管工事付属品・粉末や金製品・道具類                                       | 6.69E+1                                                            | 4.46E+0                                       | 3.70E+1                                                | 2.54E+1                                             | 3.32E+0                                     |
| JD193      | 289909      | Other metal products                                       | その他の金属製品                                                 | 6.98E+1                                                            | 4.63E+0                                       | 4.30E+1                                                | 2.22E+1                                             | 2.84E+0                                     |
| JD194      | 301101      | Boilers                                                    | ボイラ                                                      | 3.95E+1                                                            | 2.30E+0                                       | 2.73E+1                                                | 9.92E+0                                             | 1.93E+0                                     |
| JD195      | 301102      | Turbines                                                   | タービン                                                     | 5.09E+1                                                            | 2.69E+0                                       | 3.46E+1                                                | 1.36E+1                                             | 2.02E+0                                     |
| JD196      | 301103      | Engines                                                    | 原動機                                                      | 6.04E+1                                                            | 2.08E+0                                       | 4.20E+1                                                | 1.64E+1                                             | 2.02E+0                                     |
| JD197      | 301201      | Conveyors                                                  | 運搬機械                                                     | 5.35E+1                                                            | 8.92E-1                                       | 3.41E+1                                                | 1.86E+1                                             | 2.54E+0                                     |
| JD198      | 301301      | Refrigerators and air conditioning apparatus               | 冷凍機・温湿調整装置                                               | 4.69E+1                                                            | 1.38E+0                                       | 2.79E+1                                                | 1.76E+1                                             | 2.59E+0                                     |
| JD199      | 301901      | Pumps and compressors                                      | ポンプ及び圧縮機                                                 | 5.76E+1                                                            | 1.20E+0                                       | 3.97E+1                                                | 1.67E+1                                             | 2.08E+0                                     |
| JD200      | 301902      | Machinists' precision tools                                | 機械工具                                                     | 5.55E+1                                                            | 1.52E+0                                       | 3.45E+1                                                | 1.95E+1                                             | 2.91E+0                                     |
| JD201      | 301909      | Other general industrial machinery and equipment           | その他の一般産業機械及び装置                                           | 5.53E+1                                                            | 2.02E+0                                       | 3.91E+1                                                | 1.41E+1                                             | 1.84E+0                                     |
| JD202      | 302101      | Machinery and equipment for construction and mining        | 建設・鉱山機械                                                  | 5.39E+1                                                            | 1.72E+0                                       | 3.82E+1                                                | 1.40E+1                                             | 1.95E+0                                     |
| JD203      | 302201      | Chemical machinery                                         | 化学機械                                                     | 4.19E+1                                                            | 8.52E-1                                       | 3.02E+1                                                | 1.09E+1                                             | 1.92E+0                                     |
| JD204      | 302301      | Industrial robots                                          | 産業用ロボット                                                  | 4.66E+1                                                            | 8.42E-1                                       | 3.22E+1                                                | 1.36E+1                                             | 2.23E+0                                     |
| JD205      | 302401      | Metal machine tools                                        | 金属工作機械                                                   | 4.39E+1                                                            | 4.80E-1                                       | 3.22E+1                                                | 1.13E+1                                             | 1.97E+0                                     |
| JD206      | 302402      | Metal processing machinery                                 | 金属加工機械                                                   | 5.23E+1                                                            | 1.12E+0                                       | 3.98E+1                                                | 1.14E+1                                             | 1.71E+0                                     |
| JD207      | 302901      | Machinery for agricultural use                             | 農業用機械                                                    | 5.12E+1                                                            | 2.52E+0                                       | 3.72E+1                                                | 1.16E+1                                             | 1.69E+0                                     |
| JD208      | 302902      | Textile machinery                                          | 繊維機械                                                     | 5.03E+1                                                            | 1.67E+0                                       | 3.33E+1                                                | 1.53E+1                                             | 2.26E+0                                     |
| JD209      | 302903      | Food processing machinery and equipment                    | 食品機械・同装置                                                 | 5.79E+1                                                            | 9.32E-1                                       | 4.27E+1                                                | 1.42E+1                                             | 1.83E+0                                     |
| JD210      | 302904      | Semiconductor making equipment                             | 半導体製造装置                                                  | 4.07E+1                                                            | 6.77E-1                                       | 2.84E+1                                                | 1.16E+1                                             | 2.16E+0                                     |
| JD211      | 302905      | Vacuum equipment and vacuum component                      | 真空装置・真空機器                                                | 5.21E+1                                                            | 1.51E+0                                       | 3.69E+1                                                | 1.37E+1                                             | 1.89E+0                                     |
| JD212      | 302909      | Other special machinery for industrial use                 | その他の特殊産業用機械                                              | 4.71E+1                                                            | 1.20E+0                                       | 3.21E+1                                                | 1.38E+1                                             | 2.16E+0                                     |
| JD213      | 303101      | Metal molds                                                | 金型                                                       | 5.15E+1                                                            | 1.44E+0                                       | 3.92E+1                                                | 1.09E+1                                             | 1.56E+0                                     |
| JD214      | 303102      | Bearings                                                   | ベアリング                                                    | 7.97E+1                                                            | 2.83E+0                                       | 6.18E+1                                                | 1.51E+1                                             | 1.43E+0                                     |
| JD215      | 303109      | Other general machines and parts                           | その他の一般機械器具及び部品                                           | 5.48E+1                                                            | 2.24E+0                                       | 3.59E+1                                                | 1.67E+1                                             | 2.29E+0                                     |
| JD216      | 311101      | Copy machine                                               | 複写機                                                      | 4.71E+1                                                            | 1.02E+0                                       | 2.83E+1                                                | 1.77E+1                                             | 3.36E+0                                     |
| JD217      | 311109      | Other office machines                                      | その他の事務用機械                                                | 4.02E+1                                                            | 6.65E-1                                       | 2.48E+1                                                | 1.47E+1                                             | 3.25E+0                                     |
| JD218      | 311201      | Machinery for service industry                             | サービス用機器                                                  | 4.46E+1                                                            | 9.07E-1                                       | 2.86E+1                                                | 1.50E+1                                             | 2.78E+0                                     |
| JD219      | 321101      | Rotating electrical equipment                              | 回転電気機械                                                   | 6.47E+1                                                            | 2.36E+0                                       | 4.00E+1                                                | 2.23E+1                                             | 2.46E+0                                     |
| JD220      | 321102      | Transformers and reactors                                  | 変圧器・変成器                                                  | 6.14E+1                                                            | 2.61E-1                                       | 3.50E+1                                                | 2.62E+1                                             | 3.10E+0                                     |
| JD221      | 321103      | Relay switches and switchboards                            | 開閉制御装置及び配電盤                                              | 4.75E+1                                                            | 1.10E+0                                       | 2.95E+1                                                | 1.69E+1                                             | 2.60E+0                                     |
| JD222      | 321104      | Wiring devices and supplies                                | 配線器具                                                     | 4.60E+1                                                            | 1.65E+0                                       | 2.48E+1                                                | 1.96E+1                                             | 2.91E+0                                     |
| JD223      | 321105      | Electrical equipment for internal combustion engines       | 内燃機関電装品                                                  | 4.68E+1                                                            | 1.07E+0                                       | 3.00E+1                                                | 1.57E+1                                             | 2.45E+0                                     |
| JD224      | 321109      | Other electrical devices and parts                         | その他の産業用電気機器                                              | 4.95E+1                                                            | 1.31E+0                                       | 2.90E+1                                                | 1.91E+1                                             | 2.75E+0                                     |
| JD225      | 322101      | Applied electronic equipment                               | 電子応用装置                                                   | 3.54E+1                                                            | 2.45E-1                                       | 1.90E+1                                                | 1.62E+1                                             | 4.46E+0                                     |
| JD226      | 323101      | Electric measuring instruments                             | 電気計測器                                                    | 3.26E+1                                                            | 5.14E-1                                       | 1.82E+1                                                | 1.39E+1                                             | 4.01E+0                                     |
| JD227      | 324101      | Electric bulbs                                             | 電球類                                                      | 4.37E+1                                                            | 5.12E+0                                       | 2.79E+1                                                | 1.13E+1                                             | 1.99E+0                                     |
| JD228      | 324102      | Electric lighting fixtures and apparatus                   | 電気照明器具                                                   | 4.56E+1                                                            | 2.45E+0                                       | 2.75E+1                                                | 1.57E+1                                             | 2.56E+0                                     |
| JD229      | 324103      | Batteries                                                  | 電池                                                       | 7.26E+1                                                            | 3.13E+0                                       | 3.61E+1                                                | 3.33E+1                                             | 3.76E+0                                     |
| JD230      | 324109      | Other electrical devices and parts                         | その他の電気機械器具                                               | 6.90E+1                                                            | 6.25E+0                                       | 2.25E+1                                                | 4.03E+1                                             | 6.10E+0                                     |
| JD231      | 325101      | Household air-conditioners                                 | 民生用エアコンディショナ                                             | 4.63E+1                                                            | 1.04E+0                                       | 2.85E+1                                                | 1.68E+1                                             | 2.89E+0                                     |
| JD232      | 325102      | Household electric appliances (except air-conditioners)    | 民生用電気機器(除エアコン)                                           | 4.59E+1                                                            | 4.46E-1                                       | 2.76E+1                                                | 1.78E+1                                             | 2.93E+0                                     |
| JD233      | 331101      | Video recording and playback equipment                     | ビデオ機器                                                    | 4.54E+1                                                            | 9.28E-2                                       | 2.45E+1                                                | 2.08E+1                                             | 4.02E+0                                     |
| JD234      | 331102      | Electric audio equipment                                   | 電気音響機器                                                   | 4.31E+1                                                            | 9.27E-1                                       | 2.46E+1                                                | 1.75E+1                                             | 3.54E+0                                     |
| JD235      | 331103      | Radio and television sets                                  | ラジオ・テレビ受信機                                               | 4.22E+1                                                            | 4.16E-1                                       | 2.59E+1                                                | 1.60E+1                                             | 3.33E+0                                     |
| JD236      | 332101      | Wired communication equipment                              | 有線電気通信機器                                                 | 4.03E+1                                                            | 8.96E-1                                       | 2.16E+1                                                | 1.78E+1                                             | 3.57E+0                                     |
| JD237      | 332102      | Cellular phones                                            | 携帯電話機                                                    | 3.98E+1                                                            | 9.50E-1                                       | 2.09E+1                                                | 1.80E+1                                             | 3.98E+0                                     |
| JD238      | 332103      | Radio communication equipment (except cellular phones)     | 無線電気通信機器(除携帯電話機)                                         | 4.11E+1                                                            | 1.03E+0                                       | 2.02E+1                                                | 1.98E+1                                             | 3.98E+0                                     |
| JD239      | 332109      | Other communication equipment                              | その他の電気通信機器                                               | 3.70E+1                                                            | 1.50E+0                                       | 2.17E+1                                                | 1.38E+1                                             | 3.01E+0                                     |
| JD240      | 333101      | Personal Computers                                         | パーソナルコンピュータ                                              | 4.04E+1                                                            | 3.06E-1                                       | 1.84E+1                                                | 2.16E+1                                             | 5.30E+0                                     |
| JD241      | 333102      | Electronic computing equipment (except personal computers) | 電子計算機本体(除パソコン)                                           | 3.44E+1                                                            | 3.39E-1                                       | 1.64E+1                                                | 1.76E+1                                             | 5.11E+0                                     |
| JD242      | 333103      | Electronic computing equipment (accessory equipment)       | 電子計算機付属装置                                                | 3.86E+1                                                            | 2.43E-1                                       | 2.12E+1                                                | 1.71E+1                                             | 4.30E+0                                     |
| JD243      | 341101      | Semiconductor devices                                      | 半導体素子                                                    | 4.26E+1                                                            | 6.18E+0                                       | 2.38E+1                                                | 1.27E+1                                             | 2.27E+0                                     |
| JD244      | 341102      | Integrated circuits                                        | 集積回路                                                     | 5.28E+1                                                            | 3.89E+0                                       | 3.27E+1                                                | 1.62E+1                                             | 2.48E+0                                     |
| JD245      | 342101      | Electron tubes                                             | 電子管                                                      | 7.56E+1                                                            | 6.45E+0                                       | 3.68E+1                                                | 3.23E+1                                             | 4.16E+0                                     |
| JD246      | 342102      | Liquid crystal element                                     | 液晶素子                                                     | 4.40E+1                                                            | 1.26E+0                                       | 2.46E+1                                                | 1.81E+1                                             | 4.15E+0                                     |
| JD247      | 342103      | Magnetic tapes and discs                                   | 磁気テープ・磁気ディスク                                             | 7.62E+1                                                            | 1.65E+1                                       | 4.48E+1                                                | 1.49E+1                                             | 1.76E+0                                     |
| JD248      | 342109      | Other electronic components                                | その他の電子部品                                                 | 5.23E+1                                                            | 1.83E+0                                       | 2.99E+1                                                | 2.06E+1                                             | 2.90E+0                                     |
| JD249      | 351101      | Passenger motor cars                                       | 乗用車                                                      | 5.49E+1                                                            | 9.70E-1                                       | 3.78E+1                                                | 1.61E+1                                             | 2.23E+0                                     |
| JD250      | 352101      | Trucks, buses and other cars                               | トラック・バス・その他の自動車                                          | 5.62E+1                                                            | 2.12E+0                                       | 3.76E+1                                                | 1.64E+1                                             | 2.21E+0                                     |
| JD251      | 353101      | Two-wheel motor vehicles                                   | 二輪自動車                                                    | 4.93E+1                                                            | 1.14E+0                                       | 3.20E+1                                                | 1.62E+1                                             | 2.38E+0                                     |
| JD252      | 354101      | Motor vehicle bodies                                       | 自動車車体                                                    | 7.19E+1                                                            | 3.29E+0                                       | 4.94E+1                                                | 1.92E+1                                             | 2.65E+0                                     |
| JD253      | 354102      | Internal combustion engines for motor vehicles and parts   | 自動車用内燃機関・同部品                                             | 6.22E+1                                                            | 4.05E+0                                       | 3.86E+1                                                | 1.96E+1                                             | 2.25E+0                                     |
| JD254      | 354103      | Motor vehicle parts and accessories                        | 自動車部品                                                    | 5.77E+1                                                            | 2.52E+0                                       | 3.86E+1                                                | 1.66E+1                                             | 2.15E+0                                     |
| JD255      | 361101      | Steel ships                                                | 鋼船                                                       | 9.19E+1                                                            | 1.51E+0                                       | 7.11E+1                                                | 1.93E+1                                             | 1.71E+0                                     |
| JD256      | 361102      | Ships (except steel ships)                                 | その他の船舶                                                   | 4.58E+1                                                            | 1.19E+0                                       | 3.38E+1                                                | 1.08E+1                                             | 1.82E+0                                     |
| JD257      | 361103      | Internal combustion engines for vessels                    | 船用内燃機関                                                   | 7.90E+1                                                            | 1.52E+1                                       | 5.00E+1                                                | 1.38E+1                                             | 1.36E+0                                     |
| JD258      | 361110      | Repair of ships                                            | 船舶修理                                                     | 5.18E+1                                                            | 6.28E-1                                       | 3.87E+1                                                | 1.26E+1                                             | 1.93E+0                                     |
| JD259      | 362101      | Rolling stock                                              | 鉄道車両                                                     | 6.43E+1                                                            | 2.34E+0                                       | 4.55E+1                                                | 1.65E+1                                             | 1.87E+0                                     |
| JD260      | 362110      | Repair of rolling stock                                    | 鉄道車両修理                                                   | 9.32E+1                                                            | 2.04E+1                                       | 5.34E+1                                                | 1.93E+1                                             | 1.56E+0                                     |
| JD261      | 362201      | Aircrafts                                                  | 航空機                                                      | 4.11E+1                                                            | 7.21E+0                                       | 1.88E+1                                                | 1.52E+1                                             | 3.73E+0                                     |
| JD262      | 362210      | Repair of aircrafts                                        | 航空機修理                                                    | 3.52E+1                                                            | 3.14E+0                                       | 9.95E+0                                                | 2.21E+1                                             | 1.09E+1                                     |
| JD263      | 362901      | Bicycles                                                   | 自転車                                                      | 8.51E+1                                                            | 1.73E+1                                       | 3.72E+1                                                | 3.06E+1                                             | 2.80E+0                                     |
| JD264      | 362909      | Other transport equipment                                  | その他の輸送機械                                                 | 6.00E+1                                                            | 3.86E+0                                       | 4.24E+1                                                | 1.37E+1                                             | 1.67E+0                                     |
| JD265      | 371101      | Camera                                                     | カメラ                                                      | 3.73E+1                                                            | 1.42E+0                                       | 2.20E+1                                                | 1.39E+1                                             | 3.19E+0                                     |
| JD266      | 371109      | Other photographic and optical instruments                 | その他の光学機械                                                 | 4.96E+1                                                            | 1.96E+0                                       | 3.04E+1                                                | 1.73E+1                                             | 2.93E+0                                     |
| JD267      | 371201      | Watches and clocks                                         | 時計                                                       | 4.74E+1                                                            | 2.09E+0                                       | 2.39E+1                                                | 2.14E+1                                             | 8.24E+0                                     |

Table A1: Embodied global energy intensities of Japanese goods and services based on producer price in 2005 [4/5]

| Sector no. | Sector code | Sector name<br>[Japanese domestic commodity]                   | Sector name in Japanese<br>[Japanese domestic commodity] | Embodied global energy intensities based on producer price in 2005 |                                         |                                                  |                                               |                                          |
|------------|-------------|----------------------------------------------------------------|----------------------------------------------------------|--------------------------------------------------------------------|-----------------------------------------|--------------------------------------------------|-----------------------------------------------|------------------------------------------|
|            |             |                                                                |                                                          | Total                                                              | (D) Direct consumptions in Japan during | (S) Induced consumptions in Japan through supply | (F) Induced consumptions in foreign country's | Coefficient of variance of the intensity |
|            |             |                                                                |                                                          |                                                                    |                                         |                                                  |                                               |                                          |
| JD268      | 371901      | Professional and scientific instruments                        | 理化学機械器具                                                  | 3.56E+1                                                            | 2.27E+0                                 | 2.49E+1                                          | 8.44E+0                                       | 1.77E+0                                  |
| JD269      | 371902      | Analytical instruments, testing machine, measuring instruments | 分析器・試験機・計量器・測定器                                          | 3.46E+1                                                            | 1.11E+0                                 | 2.23E+1                                          | 1.12E+1                                       | 2.54E+0                                  |
| JD270      | 371903      | Medical instruments                                            | 医療用機械器具                                                  | 4.03E+1                                                            | 2.56E+0                                 | 2.44E+1                                          | 1.33E+1                                       | 2.57E+0                                  |
| JD271      | 391101      | Toys and games                                                 | おもちゃ                                                     | 4.93E+1                                                            | 2.41E+0                                 | 2.42E+1                                          | 2.27E+1                                       | 3.62E+0                                  |
| JD272      | 391102      | Sporting and athletic goods                                    | 運動用品                                                     | 5.60E+1                                                            | 2.33E+0                                 | 3.69E+1                                          | 1.68E+1                                       | 2.37E+0                                  |
| JD273      | 391901      | Musical instruments                                            | 楽器                                                       | 4.12E+1                                                            | 7.76E-1                                 | 2.48E+1                                          | 1.56E+1                                       | 3.01E+0                                  |
| JD274      | 391902      | Audio and video records, other information recording media     | 情報記録物                                                    | 3.67E+1                                                            | 6.47E-1                                 | 2.67E+1                                          | 9.27E+0                                       | 2.22E+0                                  |
| JD275      | 391903      | Stationery                                                     | 筆記具・文具                                                   | 4.29E+1                                                            | 1.31E+0                                 | 2.96E+1                                          | 1.20E+1                                       | 2.35E+0                                  |
| JD276      | 391904      | Jewelry and adornments                                         | 身辺細貨品                                                    | 5.54E+1                                                            | 1.04E+0                                 | 2.02E+1                                          | 3.41E+1                                       | 6.22E+0                                  |
| JD277      | 391905      | "Tatami" (straw matting) and straw products                    | 畳・わら加工品                                                  | 3.93E+1                                                            | 7.09E-1                                 | 1.18E+1                                          | 2.68E+1                                       | 6.14E+0                                  |
| JD278      | 391906      | Ordnance                                                       | 武器                                                       | 4.78E+1                                                            | 7.65E-1                                 | 2.86E+1                                          | 1.84E+1                                       | 2.86E+0                                  |
| JD279      | 391909      | Miscellaneous manufacturing products                           | その他の製造工業製品                                               | 4.34E+1                                                            | 7.45E-1                                 | 2.82E+1                                          | 1.44E+1                                       | 2.54E+0                                  |
| JD280      | 392101      | Reuse and recycling                                            | 再生資源回収・加工処理                                              | 4.93E+1                                                            | 6.43E+0                                 | 3.77E+1                                          | 5.19E+0                                       | 1.66E+0                                  |
| JD281      | 411101      | Residential construction (wooden)                              | 住宅建築(木造)                                                 | 3.43E+1                                                            | 7.49E-1                                 | 2.07E+1                                          | 1.29E+1                                       | 2.49E+0                                  |
| JD282      | 411102      | Residential construction (non-wooden)                          | 住宅建築(非木造)                                                | 4.42E+1                                                            | 1.74E+0                                 | 2.89E+1                                          | 1.35E+1                                       | 2.21E+0                                  |
| JD283      | 411201      | Non-residential construction (wooden)                          | 非住宅建築(木造)                                                | 3.58E+1                                                            | 8.62E-1                                 | 2.16E+1                                          | 1.34E+1                                       | 2.53E+0                                  |
| JD284      | 411202      | Non-residential construction (non-wooden)                      | 非住宅建築(非木造)                                               | 4.63E+1                                                            | 1.82E+0                                 | 2.93E+1                                          | 1.51E+1                                       | 2.38E+0                                  |
| JD285      | 412101      | Repair of construction                                         | 建設補修                                                     | 4.19E+1                                                            | 2.50E+0                                 | 2.73E+1                                          | 1.21E+1                                       | 2.21E+0                                  |
| JD286      | 413101      | Public construction of roads                                   | 道路関係公共事業                                                 | 4.72E+1                                                            | 6.23E+0                                 | 3.17E+1                                          | 9.29E+0                                       | 1.93E+0                                  |
| JD287      | 413102      | Public construction of rivers, drainages and others            | 河川・下水道・その他の公共事業                                          | 4.34E+1                                                            | 4.58E+0                                 | 3.06E+1                                          | 8.28E+0                                       | 1.72E+0                                  |
| JD288      | 413103      | Agricultural public construction                               | 農林関係公共事業                                                 | 5.37E+1                                                            | 7.17E+0                                 | 3.66E+1                                          | 9.94E+0                                       | 1.75E+0                                  |
| JD289      | 413201      | Railway construction                                           | 鉄道軌道建設                                                   | 5.18E+1                                                            | 2.93E+0                                 | 3.76E+1                                          | 1.13E+1                                       | 1.67E+0                                  |
| JD290      | 413202      | Electric power facilities construction                         | 電力施設建設                                                   | 5.10E+1                                                            | 2.27E+0                                 | 3.03E+1                                          | 1.84E+1                                       | 2.63E+0                                  |
| JD291      | 413203      | Telecommunication facilities construction                      | 電気通信施設建設                                                 | 4.63E+1                                                            | 3.58E+0                                 | 2.67E+1                                          | 1.60E+1                                       | 2.50E+0                                  |
| JD292      | 413209      | Other civil engineering and construction                       | その他の土木建設                                                 | 4.59E+1                                                            | 3.46E+0                                 | 3.27E+1                                          | 9.77E+0                                       | 1.73E+0                                  |
| JD293      | 5111001     | Electricity                                                    | 事業用電力                                                    | 4.73E+2                                                            | 4.17E+2                                 | 2.72E+1                                          | 2.79E+1                                       | 6.54E-1                                  |
| JD294      | 511104      | On-site power generation                                       | 自家発電                                                     | 8.02E+2                                                            | 7.36E+2                                 | 2.92E+1                                          | 3.63E+1                                       | 5.13E-1                                  |
| JD295      | 512101      | Gas supply                                                     | 都市ガス                                                     | 8.24E+1                                                            | 3.72E+0                                 | 1.92E+1                                          | 5.94E+1                                       | 9.60E+0                                  |
| JD296      | 512201      | Steam and hot water supply                                     | 熱供給業                                                     | 2.51E+2                                                            | 1.62E+2                                 | 7.18E+1                                          | 1.79E+1                                       | 8.56E-1                                  |
| JD297      | 521101      | Water supply                                                   | 上水道・簡易水道                                                 | 2.11E+1                                                            | 1.23E+0                                 | 1.61E+1                                          | 3.80E+0                                       | 1.45E+0                                  |
| JD298      | 521102      | Industrial water supply                                        | 工業用水                                                     | 2.45E+1                                                            | 1.03E+0                                 | 2.05E+1                                          | 3.01E+0                                       | 1.07E+0                                  |
| JD299      | 521103      | Sewage disposal **                                             | 下水道★                                                     | 1.43E+2                                                            | 5.19E+1                                 | 7.52E+1                                          | 1.60E+1                                       | 1.17E+0                                  |
| JD300      | 521201      | Waste management services (public) **                          | 廃棄物処理(公営)★                                               | 5.89E+1                                                            | 1.31E+1                                 | 3.85E+1                                          | 7.28E+0                                       | 1.26E+0                                  |
| JD301      | 521202      | Waste management services (private)                            | 廃棄物処理(産業)                                                | 3.49E+1                                                            | 1.00E+1                                 | 2.02E+1                                          | 4.70E+0                                       | 1.36E+0                                  |
| JD302      | 611101      | Wholesale trade                                                | 卸売                                                       | 1.64E+1                                                            | 1.26E+0                                 | 1.13E+1                                          | 3.85E+0                                       | 4.40E+0                                  |
| JD303      | 611201      | Retail trade                                                   | 小売                                                       | 3.36E+1                                                            | 5.27E+0                                 | 2.41E+1                                          | 4.25E+0                                       | 1.36E+0                                  |
| JD304      | 621101      | Financial service                                              | 金融                                                       | 9.54E+0                                                            | 2.93E-1                                 | 7.12E+0                                          | 2.13E+0                                       | 2.26E+0                                  |
| JD305      | 621201      | Life insurance                                                 | 生命保険                                                     | 1.18E+1                                                            | 5.98E-1                                 | 8.42E+0                                          | 2.83E+0                                       | 2.13E+0                                  |
| JD306      | 621202      | Non-life insurance                                             | 損害保険                                                     | 1.03E+1                                                            | 5.81E-1                                 | 7.72E+0                                          | 1.98E+0                                       | 1.78E+0                                  |
| JD307      | 641101      | Real estate agencies and managers                              | 不動産仲介・管理業                                                | 1.72E+1                                                            | 1.06E+0                                 | 1.34E+1                                          | 2.71E+0                                       | 1.36E+0                                  |
| JD308      | 641102      | Real estate rental service                                     | 不動産賃貸業                                                   | 1.62E+1                                                            | 2.21E+0                                 | 1.23E+1                                          | 1.73E+0                                       | 1.12E+0                                  |
| JD309      | 642101      | House rent                                                     | 住宅賃貸料                                                    | 7.18E+0                                                            | 9.72E-1                                 | 4.49E+0                                          | 1.71E+0                                       | 1.99E+0                                  |
| JD310      | 642201      | House rent (imputed house rent)                                | 住宅賃貸料(帰属家賃)                                              | 2.90E+0                                                            | 0.00E+0                                 | 2.08E+0                                          | 8.21E-1                                       | 2.16E+0                                  |
| JD311      | 711101      | Railway transport (passengers)                                 | 鉄道旅客輸送                                                   | 4.17E+1                                                            | 2.12E+0                                 | 3.39E+1                                          | 5.62E+0                                       | 1.19E+0                                  |
| JD312      | 711201      | Railway transport (freight)                                    | 鉄道貨物輸送                                                   | 6.85E+1                                                            | 9.78E+0                                 | 5.11E+1                                          | 7.62E+0                                       | 1.13E+0                                  |
| JD313      | 712101      | Bus transport service                                          | バス                                                       | 4.44E+1                                                            | 2.81E+1                                 | 8.93E+0                                          | 7.44E+0                                       | 2.66E+0                                  |
| JD314      | 712102      | Hired car and taxi transport                                   | ハイヤー・タクシー                                                | 5.03E+1                                                            | 3.60E+1                                 | 5.58E+0                                          | 8.72E+0                                       | 2.72E+0                                  |
| JD315      | 712201      | Road freight transport(except Self-transport by private cars)  | 道路貨物輸送(除自家輸送)                                            | 5.37E+1                                                            | 3.43E+1                                 | 1.18E+1                                          | 7.52E+0                                       | 2.63E+0                                  |
| JD316      | 713101      | Self-transport by private cars (passengers)                    | 自家輸送(旅客自動車)                                              | 1.65E+2                                                            | 1.11E+2                                 | 2.73E+1                                          | 2.73E+1                                       | 3.38E+0                                  |
| JD317      | 713201      | Self-transport by private cars (freight)                       | 自家輸送(貨物自動車)                                              | 1.58E+2                                                            | 1.07E+2                                 | 2.65E+1                                          | 2.44E+1                                       | 3.06E+0                                  |
| JD318      | 714101      | Ocean transport                                                | 外洋輸送                                                     | 2.99E+2                                                            | 1.92E+2                                 | 8.28E+0                                          | 9.82E+1                                       | 1.14E+1                                  |
| JD319      | 714201      | Coastal and inland water transport                             | 沿海・内水面輸送                                                 | 1.79E+2                                                            | 1.48E+2                                 | 1.66E+1                                          | 1.39E+1                                       | 1.30E+0                                  |
| JD320      | 714301      | Harbor transport service                                       | 港湾輸送                                                     | 2.37E+1                                                            | 1.19E+1                                 | 8.39E+0                                          | 3.37E+0                                       | 1.71E+0                                  |
| JD321      | 715101      | Air transport                                                  | 航空輸送                                                     | 1.67E+2                                                            | 1.30E+2                                 | 1.32E+1                                          | 2.45E+1                                       | 1.72E+0                                  |
| JD322      | 716101      | Consigned freight forwarding                                   | 貨物利用運送                                                   | 2.17E+1                                                            | 7.77E+0                                 | 1.02E+1                                          | 3.75E+0                                       | 2.07E+0                                  |
| JD323      | 717101      | Storage facility service                                       | 倉庫                                                       | 3.55E+1                                                            | 1.01E+0                                 | 3.07E+1                                          | 3.83E+0                                       | 9.74E-1                                  |
| JD324      | 718101      | Packing service                                                | こん包                                                      | 3.31E+1                                                            | 1.17E+0                                 | 2.41E+1                                          | 7.82E+0                                       | 1.76E+0                                  |
| JD325      | 718901      | Facility service for road transport                            | 道路輸送施設提供                                                 | 2.02E+1                                                            | 1.14E+0                                 | 1.63E+1                                          | 2.79E+0                                       | 1.17E+0                                  |
| JD326      | 718902      | Port and water traffic control **                              | 水運施設管理★                                                  | 2.46E+1                                                            | 9.26E+0                                 | 1.09E+1                                          | 4.46E+0                                       | 1.66E+0                                  |
| JD327      | 718903      | Services relating to water transport                           | その他の水運付帯サービス                                             | 9.28E+0                                                            | 2.15E+0                                 | 5.26E+0                                          | 1.88E+0                                       | 1.83E+0                                  |
| JD328      | 718904      | Airport and air traffic control (public) **                    | 航空施設管理(国営)★                                              | 3.03E+1                                                            | 1.39E+0                                 | 2.40E+1                                          | 4.92E+0                                       | 1.38E+0                                  |
| JD329      | 718905      | Airport and air traffic control                                | 航空施設管理(産業)                                               | 3.95E+1                                                            | 6.73E+0                                 | 2.76E+1                                          | 5.21E+0                                       | 1.17E+0                                  |
| JD330      | 718906      | Services relating to air transport                             | その他の航空付帯サービス                                             | 1.87E+1                                                            | 2.37E+0                                 | 1.35E+1                                          | 2.88E+0                                       | 1.36E+0                                  |
| JD331      | 718909      | Travel agency and other services relating to transport         | 旅行・その他の運輸付帯サービス                                          | 1.35E+1                                                            | 7.62E-1                                 | 9.53E+0                                          | 3.22E+0                                       | 2.32E+0                                  |
| JD332      | 731101      | Postal service*                                                | 郵便・信書便                                                   | 1.67E+1                                                            | 2.18E+0                                 | 1.19E+1                                          | 2.61E+0                                       | 2.17E+0                                  |
| JD333      | 731201      | Fixed telecommunication                                        | 固定電気通信                                                   | 1.63E+1                                                            | 8.24E-1                                 | 1.23E+1                                          | 3.20E+0                                       | 1.89E+0                                  |
| JD334      | 731202      | Mobile telecommunication                                       | 移動電気通信                                                   | 1.17E+1                                                            | 8.96E-1                                 | 8.13E+0                                          | 2.63E+0                                       | 1.89E+0                                  |
| JD335      | 731203      | Other telecommunication                                        | その他の電気通信                                                 | 2.12E+1                                                            | 8.67E-1                                 | 1.62E+1                                          | 4.17E+0                                       | 1.71E+0                                  |
| JD336      | 731909      | Other services relating to communication                       | その他の通信サービス                                               | 2.03E+1                                                            | 2.06E+0                                 | 1.49E+1                                          | 3.39E+0                                       | 1.42E+0                                  |
| JD337      | 732101      | Public broadcasting                                            | 公共放送                                                     | 2.20E+1                                                            | 7.98E-1                                 | 1.70E+1                                          | 4.22E+0                                       | 1.87E+0                                  |
| JD338      | 732102      | Private broadcasting                                           | 民間放送                                                     | 1.93E+1                                                            | 1.56E+0                                 | 1.20E+1                                          | 5.82E+0                                       | 3.41E+0                                  |
| JD339      | 732103      | Cable broadcasting                                             | 有線放送                                                     | 1.72E+1                                                            | 1.19E+0                                 | 1.19E+1                                          | 4.06E+0                                       | 2.02E+0                                  |
| JD340      | 733101      | Information services                                           | 情報サービス                                                   | 1.45E+1                                                            | 4.38E-1                                 | 1.13E+1                                          | 2.77E+0                                       | 1.80E+0                                  |
| JD341      | 734101      | Internet based services                                        | インターネット附随サービス                                            | 1.95E+1                                                            | 5.73E-1                                 | 1.49E+1                                          | 4.04E+0                                       | 1.78E+0                                  |
| JD342      | 735101      | Image information production and distribution industry         | 映像情報制作・配給業                                               | 2.67E+1                                                            | 2.48E+0                                 | 1.34E+1                                          | 1.09E+1                                       | 7.04E+0                                  |
| JD343      | 735102      | Newspaper                                                      | 新聞                                                       | 5.62E+1                                                            | 3.16E-1                                 | 4.44E+1                                          | 1.14E+1                                       | 1.66E+0                                  |
| JD344      | 735103      | Publication                                                    | 出版                                                       | 4.38E+1                                                            | 2.96E-1                                 | 3.69E+1                                          | 6.58E+0                                       | 1.28E+0                                  |
| JD345      | 735104      | News syndicates and private detective agencies                 | ニュース供給・興信所                                               | 1.38E+1                                                            | 1.25E-1                                 | 1.03E+1                                          | 3.32E+0                                       | 2.54E+0                                  |
| JD346      | 811101      | Public administration (central) **                             | 公務(中央)★                                                  | 2.32E+1                                                            | 3.40E+0                                 | 1.31E+1                                          | 6.63E+0                                       | 2.84E+0                                  |
| JD347      | 811201      | Public administration (local) **                               | 公務(地方)★                                                  | 1.88E+1                                                            | 4.69E+0                                 | 1.15E+1                                          | 2.63E+0                                       | 1.57E+0                                  |
| JD348      | 821101      | School education (public) **                                   | 学校教育(国公立)★                                               | 1.05E+1                                                            | 1.76E+0                                 | 7.43E+0                                          | 1.28E+0                                       | 1.26E+0                                  |
| JD349      | 821102      | School education (private) *                                   | 学校教育(私立)★                                                | 1.86E+1                                                            | 3.37E+0                                 | 1.16E+1                                          | 3.62E+0                                       | 1.69E+0                                  |
| JD350      | 821301      | Social education (public) **                                   | 社会教育(国公立)★                                               | 2.93E+1                                                            | 3.90E+0                                 | 2.10E+1                                          | 4.40E+0                                       | 1.29E+0                                  |
| JD351      | 821302      | Social education (private, non-profit) *                       | 社会教育(非営利)★                                               | 4.32E+1                                                            | 2.92E+0                                 | 3.27E+1                                          | 7.62E+0                                       | 1.47E+0                                  |
| JD352      | 821303      | Other educational and training institutions (public) **        | その他の教育訓練機関(国公立)★                                         | 6.72E+1                                                            | 3.03E+1                                 | 2.81E+1                                          | 8.77E+0                                       | 1.59E+0                                  |
| JD353      | 821304      | Other educational and training institutions (profit-making)    | その他の教育訓練機関(産業)                                           | 3.74E+1                                                            | 2.13E+1                                 | 1.11E+1                                          | 4.99E+0                                       | 1.92E+0                                  |

Table A1: Embodied global energy intensities of Japanese goods and services based on producer price in 2005 [5/5]

| Sector no. | Sector code | Sector name<br>[Japanese domestic commodity]                                                | Sector name in Japanese<br>[Japanese domestic commodity] | Embodied global energy intensities based on producer price in 2005 |                                               |                                                        |                                                     |                                             |
|------------|-------------|---------------------------------------------------------------------------------------------|----------------------------------------------------------|--------------------------------------------------------------------|-----------------------------------------------|--------------------------------------------------------|-----------------------------------------------------|---------------------------------------------|
|            |             |                                                                                             |                                                          | Total                                                              | (D) Direct<br>consumptions in<br>Japan during | (S) Induced<br>consumptions in<br>Japan through supply | (F) Induced<br>consumptions in<br>foreign country's | Coefficient of variance<br>of the intensity |
|            |             |                                                                                             |                                                          | GJ-NCV/M-JPY                                                       | GJ-NCV/M-JPY                                  | GJ-NCV/M-JPY                                           | GJ-NCV/M-JPY                                        | %                                           |
| JD354      | 822101      | Research institutes for natural science (public) **                                         | 自然科学研究機関(国公立)★★                                          | 5.41E+1                                                            | 1.10E+1                                       | 3.39E+1                                                | 9.25E+0                                             | 1.52E+0                                     |
| JD355      | 822102      | Research institutes for cultural and social science (public) **                             | 人文科学研究機関(国公立)★★                                          | 4.18E+1                                                            | 1.42E+1                                       | 2.03E+1                                                | 7.30E+0                                             | 1.95E+0                                     |
| JD356      | 822103      | Research institutes for natural sciences (private, non-profit) *                            | 自然科学研究機関(非営利)★                                           | 3.38E+1                                                            | 7.95E+0                                       | 1.79E+1                                                | 8.00E+0                                             | 2.39E+0                                     |
| JD357      | 822104      | Research institutes for cultural and social science (private, non-profit) *                 | 人文科学研究機関(非営利)★                                           | 2.14E+1                                                            | 3.75E+0                                       | 1.32E+1                                                | 4.45E+0                                             | 1.93E+0                                     |
| JD358      | 822105      | Research institutes for natural sciences (profit-making)                                    | 自然科学研究機関(産業)                                             | 7.80E+1                                                            | 2.69E+1                                       | 3.95E+1                                                | 1.15E+1                                             | 1.81E+0                                     |
| JD359      | 822106      | Research institutes for cultural and social science (profit-making)                         | 人文科学研究機関(産業)                                             | 2.06E+1                                                            | 3.86E+0                                       | 1.25E+1                                                | 4.23E+0                                             | 1.82E+0                                     |
| JD360      | 822201      | Research and development (intra-enterprise)                                                 | 企業内研究開発                                                  | 3.76E+1                                                            | 6.07E+0                                       | 2.47E+1                                                | 6.86E+0                                             | 1.59E+0                                     |
| JD361      | 831101      | Medical service (public)                                                                    | 医療(国公立)                                                  | 2.82E+1                                                            | 4.99E+0                                       | 1.66E+1                                                | 6.64E+0                                             | 1.91E+0                                     |
| JD362      | 831102      | Medical service (non-profit foundations, etc.)                                              | 医療(公益法人等)                                                | 2.28E+1                                                            | 3.72E+0                                       | 1.38E+1                                                | 5.34E+0                                             | 1.93E+0                                     |
| JD363      | 831103      | Medical service (medical corporations, etc.)                                                | 医療(医療法人等)                                                | 2.35E+1                                                            | 3.00E+0                                       | 1.46E+1                                                | 5.91E+0                                             | 2.03E+0                                     |
| JD364      | 831201      | Health and hygiene (public) **                                                              | 保健衛生(国公立)★★                                              | 2.13E+1                                                            | 5.53E+0                                       | 1.19E+1                                                | 3.88E+0                                             | 1.62E+0                                     |
| JD365      | 831202      | Health and hygiene (profit-making)                                                          | 保健衛生(産業)                                                 | 2.63E+1                                                            | 4.18E+0                                       | 1.74E+1                                                | 4.69E+0                                             | 1.52E+0                                     |
| JD366      | 831301      | Social insurance (public) **                                                                | 社会保険事業(国公立)★★                                            | 2.32E+1                                                            | 2.38E+0                                       | 1.75E+1                                                | 3.32E+0                                             | 1.25E+0                                     |
| JD367      | 831302      | Social insurance (private, non-profit) *                                                    | 社会保険事業(非営利)★                                             | 2.73E+1                                                            | 3.27E+0                                       | 2.05E+1                                                | 3.48E+0                                             | 1.15E+0                                     |
| JD368      | 831303      | Social welfare (public) **                                                                  | 社会福祉(国公立)★★                                              | 1.98E+1                                                            | 3.49E+0                                       | 1.23E+1                                                | 4.02E+0                                             | 1.66E+0                                     |
| JD369      | 831304      | Social welfare (private, non-profit) *                                                      | 社会福祉(非営利)★                                               | 1.88E+1                                                            | 2.63E+0                                       | 1.21E+1                                                | 4.05E+0                                             | 1.74E+0                                     |
| JD370      | 831305      | Social welfare (profit-making)                                                              | 社会福祉(産業)                                                 | 2.11E+1                                                            | 4.29E+0                                       | 1.26E+1                                                | 4.22E+0                                             | 1.72E+0                                     |
| JD371      | 831401      | Nursing care (In-home)                                                                      | 介護(居宅)                                                   | 1.73E+1                                                            | 2.46E+0                                       | 1.12E+1                                                | 3.66E+0                                             | 1.77E+0                                     |
| JD372      | 831402      | Nursing care (In-facility)                                                                  | 介護(施設)                                                   | 2.06E+1                                                            | 4.01E+0                                       | 1.25E+1                                                | 4.13E+0                                             | 1.71E+0                                     |
| JD373      | 841101      | Private non-profit institutions serving enterprises                                         | 対企業民間非営利団体                                               | 2.52E+1                                                            | 5.81E+0                                       | 1.40E+1                                                | 5.42E+0                                             | 2.00E+0                                     |
| JD374      | 841102      | Private non-profit institutions serving households, n.e.c. *                                | 対家計民間非営利団体(除別掲)★                                         | 1.73E+1                                                            | 3.41E+0                                       | 1.05E+1                                                | 3.40E+0                                             | 1.86E+0                                     |
| JD375      | 851101      | Advertising services                                                                        | 広告                                                       | 2.65E+1                                                            | 1.36E+0                                       | 1.93E+1                                                | 5.87E+0                                             | 2.07E+0                                     |
| JD376      | 851201      | Goods rental and leasing (except car rental)                                                | 物品賃貸業(除貸自動車)                                             | 1.17E+1                                                            | 4.45E-1                                       | 7.63E+0                                                | 3.63E+0                                             | 2.57E+0                                     |
| JD377      | 851301      | Car rental and leasing                                                                      | 貸自動車業                                                    | 1.42E+1                                                            | 3.84E+0                                       | 7.04E+0                                                | 3.32E+0                                             | 2.52E+0                                     |
| JD378      | 851410      | Repair of motor vehicles                                                                    | 自動車修理                                                    | 3.38E+1                                                            | 8.45E-1                                       | 2.33E+1                                                | 9.56E+0                                             | 2.24E+0                                     |
| JD379      | 851510      | Repair of machine                                                                           | 機械修理                                                     | 3.95E+1                                                            | 5.33E-1                                       | 2.61E+1                                                | 1.29E+1                                             | 2.45E+0                                     |
| JD380      | 851901      | Building maintenance services                                                               | 建物サービス                                                   | 1.12E+1                                                            | 1.48E+0                                       | 7.15E+0                                                | 2.54E+0                                             | 2.20E+0                                     |
| JD381      | 851902      | Judicial, financial and accounting services                                                 | 法務・財務・会計サービス                                             | 8.87E+0                                                            | 1.99E+0                                       | 5.21E+0                                                | 1.67E+0                                             | 1.96E+0                                     |
| JD382      | 851903      | Civil engineering and construction services                                                 | 土木建築サービス                                                 | 1.88E+1                                                            | 3.27E+0                                       | 1.20E+1                                                | 3.54E+0                                             | 1.65E+0                                     |
| JD383      | 851904      | Worker dispatching services                                                                 | 労働者派遣サービス                                                | 2.13E+0                                                            | 2.47E-1                                       | 1.47E+0                                                | 4.10E-1                                             | 1.77E+0                                     |
| JD384      | 851909      | Other business services                                                                     | その他の対事業所サービス                                             | 9.71E+0                                                            | 5.38E-1                                       | 7.15E+0                                                | 2.03E+0                                             | 1.97E+0                                     |
| JD385      | 861101      | Movie theaters                                                                              | 映画館                                                      | 4.55E+1                                                            | 7.54E+0                                       | 2.84E+1                                                | 9.57E+0                                             | 3.09E+0                                     |
| JD386      | 861102      | Performances (except otherwise classified), theatrical companies                            | 興行場(除別掲)・興行団                                             | 1.80E+1                                                            | 9.41E-1                                       | 1.25E+1                                                | 4.50E+0                                             | 2.71E+0                                     |
| JD387      | 861103      | Amusement and recreation facilities                                                         | 遊戯場                                                      | 3.96E+1                                                            | 8.07E+0                                       | 2.61E+1                                                | 5.47E+0                                             | 1.41E+0                                     |
| JD388      | 861104      | Stadiums and companies of bicycle, horse, motorcar and motorboat races                      | 競輪・競馬等の競走場・競技団                                           | 2.09E+1                                                            | 2.95E+0                                       | 1.45E+1                                                | 3.50E+0                                             | 1.70E+0                                     |
| JD389      | 861105      | Sport facility service, public gardens and amusement parks                                  | スポーツ施設提供業・公園・遊園地                                         | 2.38E+1                                                            | 4.18E+0                                       | 1.51E+1                                                | 4.47E+0                                             | 1.82E+0                                     |
| JD390      | 861109      | Other amusement and recreation services                                                     | その他の娯楽                                                   | 2.61E+1                                                            | 3.76E+0                                       | 1.83E+1                                                | 4.08E+0                                             | 1.92E+0                                     |
| JD391      | 861201      | General eating and drinking places (except coffee shops)                                    | 一般飲食店(除喫茶店)                                              | 3.67E+1                                                            | 5.37E+0                                       | 2.05E+1                                                | 1.08E+1                                             | 2.31E+0                                     |
| JD392      | 861202      | Coffee shops                                                                                | 喫茶店                                                      | 3.86E+1                                                            | 7.97E+0                                       | 2.09E+1                                                | 9.72E+0                                             | 1.95E+0                                     |
| JD393      | 861203      | Eating and drinking places for pleasures                                                    | 遊興飲食店                                                    | 2.91E+1                                                            | 5.54E+0                                       | 1.60E+1                                                | 7.57E+0                                             | 2.05E+0                                     |
| JD394      | 861301      | Hotels                                                                                      | 宿泊業                                                      | 4.02E+1                                                            | 6.77E+0                                       | 2.44E+1                                                | 9.02E+0                                             | 1.92E+0                                     |
| JD395      | 861401      | Cleaning                                                                                    | 洗濯業                                                      | 3.11E+1                                                            | 1.09E+1                                       | 1.61E+1                                                | 4.18E+0                                             | 1.58E+0                                     |
| JD396      | 861402      | Barber shops                                                                                | 理容業                                                      | 1.98E+1                                                            | 8.85E+0                                       | 7.49E+0                                                | 3.46E+0                                             | 1.77E+0                                     |
| JD397      | 861403      | Beauty shops                                                                                | 美容業                                                      | 1.67E+1                                                            | 4.94E+0                                       | 8.41E+0                                                | 3.36E+0                                             | 1.81E+0                                     |
| JD398      | 861404      | Public baths                                                                                | 浴場業                                                      | 7.29E+1                                                            | 3.69E+1                                       | 2.86E+1                                                | 7.34E+0                                             | 1.30E+0                                     |
| JD399      | 861409      | Other cleaning, barber shops, beauty shops and public baths                                 | その他の洗濯・理容・美容・浴場業                                         | 2.46E+1                                                            | 7.24E+0                                       | 1.25E+1                                                | 4.88E+0                                             | 1.83E+0                                     |
| JD400      | 861901      | Photographic studios                                                                        | 写真業                                                      | 1.92E+1                                                            | 1.20E+0                                       | 1.33E+1                                                | 4.63E+0                                             | 2.20E+0                                     |
| JD401      | 861902      | Ceremonial occasions                                                                        | 冠婚葬祭業                                                    | 3.78E+1                                                            | 9.21E+0                                       | 2.24E+1                                                | 6.13E+0                                             | 1.70E+0                                     |
| JD402      | 861903      | Miscellaneous repairs, n.e.c.                                                               | 各種修理業(除別掲)                                               | 2.80E+1                                                            | 4.77E+0                                       | 1.77E+1                                                | 5.49E+0                                             | 1.91E+0                                     |
| JD403      | 861904      | Supplementary tutorial schools, instruction services for arts, culture and technical skills | 個人教授業                                                    | 1.79E+1                                                            | 1.94E+0                                       | 1.33E+1                                                | 2.69E+0                                             | 1.53E+0                                     |
| JD404      | 861909      | Other personal services                                                                     | その他の対個人サービス                                              | 1.67E+1                                                            | 3.25E+0                                       | 9.97E+0                                                | 3.49E+0                                             | 2.14E+0                                     |
| JD405      | 890000      | Office supplies                                                                             | 事務用品                                                     | 7.85E+1                                                            | 0.00E+0                                       | 5.70E+1                                                | 2.15E+1                                             | 2.15E+0                                     |
| JD406      | 900000      | Activities not elsewhere classified                                                         | 分類不明                                                     | 4.22E+1                                                            | 7.07E+0                                       | 2.69E+1                                                | 8.24E+0                                             | 1.97E+0                                     |







Table A2: Embodied global GHG intensities of Japanese goods and services based on producer price in 2005 [3/5]

| Sector no. | Sector code | Sector name<br>[Japanese domestic commodity]               | Sector name in Japanese<br>[Japanese domestic commodity] | Embodied global GHG intensities based on producer price in 2005 |                                                       |                                                     |                                                                |                                             |
|------------|-------------|------------------------------------------------------------|----------------------------------------------------------|-----------------------------------------------------------------|-------------------------------------------------------|-----------------------------------------------------|----------------------------------------------------------------|---------------------------------------------|
|            |             |                                                            |                                                          | Total                                                           | (D) Direct emissions<br>in Japan during<br>production | (S) Induced<br>emissions in Japan<br>through supply | (F) Induced emissions<br>in foreign country's<br>supply chains | Coefficient of variance<br>of the intensity |
|            |             |                                                            |                                                          |                                                                 |                                                       |                                                     |                                                                |                                             |
| JD184      | 272203      | Non-ferrous metal castings and forgings                    | 非鉄金属素形材                                                  | 8.25E+0                                                         | 1.78E+0                                               | 2.08E+0                                             | 4.39E+0                                                        | 4.45E+0                                     |
| JD185      | 272204      | Nuclear fuels                                              | 核燃料                                                      | 4.02E+0                                                         | 1.45E-1                                               | 8.75E-1                                             | 3.00E+0                                                        | 6.83E+0                                     |
| JD186      | 272209      | Other non-ferrous metal products                           | その他の非鉄金属製品                                               | 1.00E+1                                                         | 3.38E-1                                               | 1.40E+0                                             | 8.27E+0                                                        | 7.38E+0                                     |
| JD187      | 281101      | Metal products for construction                            | 建設用金属製品                                                  | 8.74E+0                                                         | 1.49E-1                                               | 6.67E+0                                             | 1.92E+0                                                        | 1.93E+0                                     |
| JD188      | 281201      | Metal products for architecture                            | 建築用金属製品                                                  | 6.32E+0                                                         | 2.69E-1                                               | 3.18E+0                                             | 2.87E+0                                                        | 5.49E+0                                     |
| JD189      | 289101      | Gas and oil appliances and heating and cooking apparatus   | ガス・石油機器及び暖房機器                                            | 6.87E+0                                                         | 1.89E-1                                               | 4.63E+0                                             | 2.05E+0                                                        | 2.87E+0                                     |
| JD190      | 289901      | Bolts, nuts, rivets and springs                            | ボルト・ナット・リベット及びスプリング                                      | 7.26E+0                                                         | 2.63E-1                                               | 4.71E+0                                             | 2.29E+0                                                        | 5.29E+0                                     |
| JD191      | 289902      | Metal containers, fabricated plate and sheet metal         | 金属製容器及び製缶板金製品                                            | 6.50E+0                                                         | 3.88E-1                                               | 4.44E+0                                             | 1.67E+0                                                        | 3.34E+0                                     |
| JD192      | 289903      | Plumber's supplies, powder metallurgy products and tools   | 配管工事付属品・粉末冶金製品・道具類                                       | 5.50E+0                                                         | 2.88E-1                                               | 2.89E+0                                             | 2.32E+0                                                        | 4.27E+0                                     |
| JD193      | 289909      | Other metal products                                       | その他の金属製品                                                 | 5.83E+0                                                         | 3.04E-1                                               | 3.48E+0                                             | 2.05E+0                                                        | 4.05E+0                                     |
| JD194      | 301101      | Boilers                                                    | ボイラ                                                      | 3.22E+0                                                         | 1.64E-1                                               | 2.15E+0                                             | 9.07E-1                                                        | 2.62E+0                                     |
| JD195      | 301102      | Turbines                                                   | タービン                                                     | 4.28E+0                                                         | 1.89E-1                                               | 2.82E+0                                             | 1.27E+0                                                        | 2.85E+0                                     |
| JD196      | 301103      | Engines                                                    | 原動機                                                      | 5.11E+0                                                         | 1.35E-1                                               | 3.48E+0                                             | 1.50E+0                                                        | 2.58E+0                                     |
| JD197      | 301201      | Conveyors                                                  | 運搬機械                                                     | 4.59E+0                                                         | 5.85E-2                                               | 2.80E+0                                             | 1.73E+0                                                        | 3.41E+0                                     |
| JD198      | 301301      | Refrigerators and air conditioning apparatus               | 冷凍機・温湿調整装置                                               | 7.19E+0                                                         | 3.08E+0                                               | 2.48E+0                                             | 1.63E+0                                                        | 1.90E+0                                     |
| JD199      | 301901      | Pumps and compressors                                      | ポンプ及び圧縮機                                                 | 4.96E+0                                                         | 8.05E-2                                               | 3.33E+0                                             | 1.55E+0                                                        | 2.68E+0                                     |
| JD200      | 301902      | Machinists' precision tools                                | 機械工具                                                     | 4.65E+0                                                         | 1.05E-1                                               | 2.82E+0                                             | 1.72E+0                                                        | 3.94E+0                                     |
| JD201      | 301909      | Other general industrial machinery and equipment           | その他の一般産業機械及び装置                                           | 4.73E+0                                                         | 1.38E-1                                               | 3.29E+0                                             | 1.31E+0                                                        | 2.39E+0                                     |
| JD202      | 302101      | Machinery and equipment for construction and mining        | 建設・鉱山機械                                                  | 4.53E+0                                                         | 1.19E-1                                               | 3.11E+0                                             | 1.30E+0                                                        | 2.61E+0                                     |
| JD203      | 302201      | Chemical machinery                                         | 化学機械                                                     | 3.44E+0                                                         | 6.12E-2                                               | 2.38E+0                                             | 9.93E-1                                                        | 2.57E+0                                     |
| JD204      | 302301      | Industrial robots                                          | 産業用ロボット                                                  | 3.84E+0                                                         | 5.37E-2                                               | 2.52E+0                                             | 1.26E+0                                                        | 3.14E+0                                     |
| JD205      | 302401      | Metal machine tools                                        | 金属工作機械                                                   | 3.70E+0                                                         | 3.23E-2                                               | 2.63E+0                                             | 1.04E+0                                                        | 2.66E+0                                     |
| JD206      | 302402      | Metal processing machinery                                 | 金属加工機械                                                   | 4.42E+0                                                         | 6.85E-2                                               | 3.31E+0                                             | 1.05E+0                                                        | 2.21E+0                                     |
| JD207      | 302901      | Machinery for agricultural use                             | 農業用機械                                                    | 4.29E+0                                                         | 1.62E-1                                               | 3.07E+0                                             | 1.06E+0                                                        | 2.19E+0                                     |
| JD208      | 302902      | Textile machinery                                          | 繊維機械                                                     | 4.25E+0                                                         | 1.12E-1                                               | 2.71E+0                                             | 1.43E+0                                                        | 3.05E+0                                     |
| JD209      | 302903      | Food processing machinery and equipment                    | 食品機械・同装置                                                 | 5.04E+0                                                         | 6.53E-2                                               | 3.63E+0                                             | 1.34E+0                                                        | 2.44E+0                                     |
| JD210      | 302904      | Semiconductor making equipment                             | 半導体製造装置                                                  | 3.28E+0                                                         | 4.58E-2                                               | 2.19E+0                                             | 1.05E+0                                                        | 3.18E+0                                     |
| JD211      | 302905      | Vacuum equipment and vacuum component                      | 真空装置・真空機器                                                | 4.43E+0                                                         | 1.04E-1                                               | 3.07E+0                                             | 1.26E+0                                                        | 2.44E+0                                     |
| JD212      | 302909      | Other special machinery for industrial use                 | その他の特殊産業用機械                                              | 3.99E+0                                                         | 8.49E-2                                               | 2.62E+0                                             | 1.29E+0                                                        | 3.00E+0                                     |
| JD213      | 303101      | Metal molds                                                | 金型                                                       | 4.37E+0                                                         | 9.68E-2                                               | 3.28E+0                                             | 1.00E+0                                                        | 1.97E+0                                     |
| JD214      | 303102      | Bearings                                                   | ベアリング                                                    | 6.87E+0                                                         | 1.99E-1                                               | 5.26E+0                                             | 1.42E+0                                                        | 1.77E+0                                     |
| JD215      | 303109      | Other general machines and parts                           | その他の一般機械器具及び部品                                           | 4.61E+0                                                         | 1.60E-1                                               | 2.96E+0                                             | 1.49E+0                                                        | 2.68E+0                                     |
| JD216      | 311101      | Copy machine                                               | 複写機                                                      | 3.82E+0                                                         | 7.00E-2                                               | 2.06E+0                                             | 1.68E+0                                                        | 5.09E+0                                     |
| JD217      | 311109      | Other office machines                                      | その他の事務用機械                                                | 3.20E+0                                                         | 4.30E-2                                               | 1.77E+0                                             | 1.39E+0                                                        | 4.96E+0                                     |
| JD218      | 311201      | Machinery for service industry                             | サービス用機器                                                  | 3.87E+0                                                         | 7.67E-2                                               | 2.39E+0                                             | 1.40E+0                                                        | 3.81E+0                                     |
| JD219      | 321101      | Rotating electrical equipment                              | 回転電気機械                                                   | 5.37E+0                                                         | 1.47E-1                                               | 3.17E+0                                             | 2.05E+0                                                        | 3.26E+0                                     |
| JD220      | 321102      | Transformers and reactors                                  | 変圧器・変成器                                                  | 5.26E+0                                                         | 1.22E-1                                               | 2.74E+0                                             | 2.40E+0                                                        | 3.98E+0                                     |
| JD221      | 321103      | Relay switches and switchboards                            | 開閉制御装置及び配電盤                                              | 4.46E+0                                                         | 5.52E-1                                               | 2.34E+0                                             | 1.57E+0                                                        | 3.14E+0                                     |
| JD222      | 321104      | Wiring devices and supplies                                | 配線器具                                                     | 3.77E+0                                                         | 9.96E-2                                               | 1.83E+0                                             | 1.84E+0                                                        | 4.11E+0                                     |
| JD223      | 321105      | Electrical equipment for internal combustion engines       | 内燃機関電装品                                                  | 3.88E+0                                                         | 6.86E-2                                               | 2.40E+0                                             | 1.41E+0                                                        | 3.18E+0                                     |
| JD224      | 321109      | Other electrical devices and parts                         | その他の産業用電気機器                                              | 4.01E+0                                                         | 7.81E-2                                               | 2.20E+0                                             | 1.74E+0                                                        | 3.73E+0                                     |
| JD225      | 322101      | Applied electronic equipment                               | 電子応用装置                                                   | 3.01E+0                                                         | 1.55E-2                                               | 1.38E+0                                             | 1.62E+0                                                        | 6.95E+0                                     |
| JD226      | 323101      | Electric measuring instruments                             | 電気計測器                                                    | 2.74E+0                                                         | 3.05E-2                                               | 1.33E+0                                             | 1.39E+0                                                        | 6.32E+0                                     |
| JD227      | 324101      | Electric bulbs                                             | 電球類                                                      | 3.22E+0                                                         | 3.10E-1                                               | 1.83E+0                                             | 1.09E+0                                                        | 3.35E+0                                     |
| JD228      | 324102      | Electric lighting fixtures and apparatus                   | 電気照明器具                                                   | 3.71E+0                                                         | 1.51E-1                                               | 2.03E+0                                             | 1.53E+0                                                        | 4.13E+0                                     |
| JD229      | 324103      | Batteries                                                  | 電池                                                       | 5.82E+0                                                         | 1.95E-1                                               | 2.65E+0                                             | 2.98E+0                                                        | 4.13E+0                                     |
| JD230      | 324109      | Other electrical devices and parts                         | その他の電気機械器具                                               | 5.56E+0                                                         | 3.85E-1                                               | 1.64E+0                                             | 3.53E+0                                                        | 5.31E+0                                     |
| JD231      | 325101      | Household air-conditioners                                 | 民生用エアコンディショナ                                             | 4.12E+0                                                         | 2.58E-1                                               | 2.32E+0                                             | 1.54E+0                                                        | 3.83E+0                                     |
| JD232      | 325102      | Household electric appliances (except air-conditioners)    | 民生用電気機器(除エアコン)                                           | 3.85E+0                                                         | 3.15E-2                                               | 2.17E+0                                             | 1.65E+0                                                        | 4.02E+0                                     |
| JD233      | 331101      | Video recording and playback equipment                     | ビデオ機器                                                    | 3.83E+0                                                         | 6.15E-3                                               | 1.87E+0                                             | 1.96E+0                                                        | 5.71E+0                                     |
| JD234      | 331102      | Electric audio equipment                                   | 電気音響機器                                                   | 3.50E+0                                                         | 5.83E-2                                               | 1.78E+0                                             | 1.67E+0                                                        | 5.34E+0                                     |
| JD235      | 331103      | Radio and television sets                                  | ラジオ・テレビ受信機                                               | 3.53E+0                                                         | 2.91E-2                                               | 1.98E+0                                             | 1.52E+0                                                        | 4.90E+0                                     |
| JD236      | 332101      | Wired communication equipment                              | 有線電気通信機器                                                 | 3.29E+0                                                         | 6.39E-2                                               | 1.56E+0                                             | 1.66E+0                                                        | 5.14E+0                                     |
| JD237      | 332102      | Cellular phones                                            | 携帯電話機                                                    | 3.32E+0                                                         | 6.07E-2                                               | 1.56E+0                                             | 1.70E+0                                                        | 5.81E+0                                     |
| JD238      | 332103      | Radio communication equipment (except cellular phones)     | 無線電気通信機器(除携帯電話機)                                         | 3.42E+0                                                         | 6.17E-2                                               | 1.49E+0                                             | 1.87E+0                                                        | 5.69E+0                                     |
| JD239      | 332109      | Other communication equipment                              | その他の電気通信機器                                               | 2.97E+0                                                         | 9.04E-2                                               | 1.57E+0                                             | 1.31E+0                                                        | 4.52E+0                                     |
| JD240      | 333101      | Personal Computers                                         | パーソナルコンピュータ                                              | 3.50E+0                                                         | 2.08E-2                                               | 1.38E+0                                             | 2.10E+0                                                        | 7.74E+0                                     |
| JD241      | 333102      | Electronic computing equipment (except personal computers) | 電子計算機本体(除パソコン)                                           | 2.93E+0                                                         | 2.29E-2                                               | 1.17E+0                                             | 1.74E+0                                                        | 7.78E+0                                     |
| JD242      | 333103      | Electronic computing equipment (accessory equipment)       | 電子計算機付属装置                                                | 3.23E+0                                                         | 1.51E-2                                               | 1.56E+0                                             | 1.66E+0                                                        | 6.48E+0                                     |
| JD243      | 341101      | Semiconductor devices                                      | 半導体素子                                                    | 8.69E+0                                                         | 5.92E+0                                               | 1.63E+0                                             | 1.14E+0                                                        | 1.10E+0                                     |
| JD244      | 341102      | Integrated circuits                                        | 集積回路                                                     | 4.28E+0                                                         | 5.58E-1                                               | 2.21E+0                                             | 1.50E+0                                                        | 3.55E+0                                     |
| JD245      | 342101      | Electron tubes                                             | 電子管                                                      | 5.93E+0                                                         | 4.10E-1                                               | 2.59E+0                                             | 2.94E+0                                                        | 5.53E+0                                     |
| JD246      | 342102      | Liquid crystal element                                     | 液晶素子                                                     | 4.49E+0                                                         | 9.10E-1                                               | 1.83E+0                                             | 1.75E+0                                                        | 5.16E+0                                     |
| JD247      | 342103      | Magnetic tapes and discs                                   | 磁気テープ・磁気ディスク                                             | 5.29E+0                                                         | 1.00E+0                                               | 3.01E+0                                             | 1.28E+0                                                        | 2.46E+0                                     |
| JD248      | 342109      | Other electronic components                                | その他の電子部品                                                 | 4.08E+0                                                         | 1.29E-1                                               | 2.06E+0                                             | 1.89E+0                                                        | 4.19E+0                                     |
| JD249      | 351101      | Passenger motor cars                                       | 乗用車                                                      | 4.44E+0                                                         | 6.09E-2                                               | 2.91E+0                                             | 1.46E+0                                                        | 3.06E+0                                     |
| JD250      | 352101      | Trucks, buses and other cars                               | トラック・バス・その他の自動車                                          | 4.53E+0                                                         | 1.26E-1                                               | 2.91E+0                                             | 1.50E+0                                                        | 3.05E+0                                     |
| JD251      | 353101      | Two-wheel motor vehicles                                   | 二輪自動車                                                    | 3.97E+0                                                         | 7.74E-2                                               | 2.41E+0                                             | 1.48E+0                                                        | 3.32E+0                                     |
| JD252      | 354101      | Motor vehicle bodies                                       | 自動車車体                                                    | 6.05E+0                                                         | 1.92E-1                                               | 4.07E+0                                             | 1.78E+0                                                        | 3.77E+0                                     |
| JD253      | 354102      | Internal combustion engines for motor vehicles and parts   | 自動車用内燃機関・同部分品                                            | 4.96E+0                                                         | 2.54E-1                                               | 2.96E+0                                             | 1.75E+0                                                        | 2.83E+0                                     |
| JD254      | 354103      | Motor vehicle parts and accessories                        | 自動車部品                                                    | 4.72E+0                                                         | 1.92E-1                                               | 3.02E+0                                             | 1.51E+0                                                        | 2.87E+0                                     |
| JD255      | 361101      | Steel ships                                                | 鋼船                                                       | 8.09E+0                                                         | 9.38E-2                                               | 6.19E+0                                             | 1.81E+0                                                        | 2.18E+0                                     |
| JD256      | 361102      | Ships (except steel ships)                                 | その他の船舶                                                   | 3.58E+0                                                         | 8.46E-2                                               | 2.52E+0                                             | 9.75E-1                                                        | 2.48E+0                                     |
| JD257      | 361103      | Internal combustion engines for vessels                    | 船用内燃機関                                                   | 6.29E+0                                                         | 1.03E+0                                               | 4.01E+0                                             | 1.25E+0                                                        | 1.75E+0                                     |
| JD258      | 361110      | Repair of ships                                            | 船舶修理                                                     | 4.43E+0                                                         | 4.53E-2                                               | 3.24E+0                                             | 1.15E+0                                                        | 2.55E+0                                     |
| JD259      | 362101      | Rolling stock                                              | 鉄道車両                                                     | 5.45E+0                                                         | 1.66E-1                                               | 3.79E+0                                             | 1.50E+0                                                        | 2.34E+0                                     |
| JD260      | 362110      | Repair of rolling stock                                    | 鉄道車両修理                                                   | 7.82E+0                                                         | 1.88E+0                                               | 4.19E+0                                             | 1.75E+0                                                        | 1.97E+0                                     |
| JD261      | 362201      | Aircrafts                                                  | 航空機                                                      | 3.16E+0                                                         | 4.92E-1                                               | 1.34E+0                                             | 1.33E+0                                                        | 5.73E+0                                     |
| JD262      | 362210      | Repair of aircrafts                                        | 航空機修理                                                    | 2.86E+0                                                         | 2.08E-1                                               | 6.73E-1                                             | 1.98E+0                                                        | 1.66E+1                                     |
| JD263      | 362901      | Bicycles                                                   | 自転車                                                      | 6.54E+0                                                         | 1.07E+0                                               | 2.65E+0                                             | 2.82E+0                                                        | 4.03E+0                                     |
| JD264      | 362909      | Other transport equipment                                  | その他の輸送機械                                                 | 4.95E+0                                                         | 2.44E-1                                               | 3.44E+0                                             | 1.26E+0                                                        | 2.20E+0                                     |
| JD265      | 371101      | Camera                                                     | カメラ                                                      | 3.00E+0                                                         | 9.50E-2                                               | 1.59E+0                                             | 1.31E+0                                                        | 4.75E+0                                     |
| JD266      | 371109      | Other photographic and optical instruments                 | その他の光学機械                                                 | 3.75E+0                                                         | 1.23E-1                                               | 2.06E+0                                             | 1.56E+0                                                        | 4.11E+0                                     |



Table A2: Embodied global GHG intensities of Japanese goods and services based on producer price in 2005 [5/5]

| Sector no. | Sector code | Sector name<br>[Japanese domestic commodity]                                                | Sector name in Japanese<br>[Japanese domestic commodity] | Embodied global GHG intensities based on producer price in 2005 |                                                       |                                                     |                                                                |                                             |
|------------|-------------|---------------------------------------------------------------------------------------------|----------------------------------------------------------|-----------------------------------------------------------------|-------------------------------------------------------|-----------------------------------------------------|----------------------------------------------------------------|---------------------------------------------|
|            |             |                                                                                             |                                                          | Total                                                           | (D) Direct emissions<br>in Japan during<br>production | (S) Induced<br>emissions in Japan<br>through supply | (F) Induced emissions<br>in foreign country's<br>supply chains | Coefficient of variance<br>of the intensity |
|            |             |                                                                                             |                                                          | tCO <sub>2</sub> eq/M-JPY                                       | tCO <sub>2</sub> eq/M-JPY                             | tCO <sub>2</sub> eq/M-JPY                           | tCO <sub>2</sub> eq/M-JPY                                      | %                                           |
| JD353      | 821304      | Other educational and training institutions (profit-making)                                 | その他の教育訓練機関(産業)                                           | 2.73E+0                                                         | 1.54E+0                                               | 7.64E-1                                             | 4.25E-1                                                        | 2.26E+0                                     |
| JD354      | 822101      | Research institutes for natural science (public) **                                         | 自然科学研究機関(国公立)★★                                          | 3.71E+0                                                         | 7.02E-1                                               | 2.17E+0                                             | 8.39E-1                                                        | 2.37E+0                                     |
| JD355      | 822102      | Research institutes for cultural and social science (public) **                             | 人文科学研究機関(国公立)★★                                          | 2.93E+0                                                         | 9.74E-1                                               | 1.34E+0                                             | 6.16E-1                                                        | 2.52E+0                                     |
| JD356      | 822103      | Research institutes for natural sciences (private, non-profit) *                            | 自然科学研究機関(非営利)★                                           | 2.57E+0                                                         | 5.44E-1                                               | 1.31E+0                                             | 7.23E-1                                                        | 3.22E+0                                     |
| JD357      | 822104      | Research institutes for cultural and social science (private, non-profit) *                 | 人文科学研究機関(非営利)★                                           | 1.54E+0                                                         | 2.35E-1                                               | 9.41E-1                                             | 3.64E-1                                                        | 2.59E+0                                     |
| JD358      | 822105      | Research institutes for natural sciences (profit-making)                                    | 自然科学研究機関(産業)                                             | 5.50E+0                                                         | 1.97E+0                                               | 2.52E+0                                             | 1.01E+0                                                        | 2.30E+0                                     |
| JD359      | 822106      | Research institutes for cultural and social science (profit-making)                         | 人文科学研究機関(産業)                                             | 1.40E+0                                                         | 2.20E-1                                               | 8.30E-1                                             | 3.47E-1                                                        | 2.73E+0                                     |
| JD360      | 822201      | Research and development (intra-enterprise)                                                 | 企業内研究開発                                                  | 2.63E+0                                                         | 4.45E-1                                               | 1.59E+0                                             | 5.93E-1                                                        | 2.29E+0                                     |
| JD361      | 831101      | Medical service (public)                                                                    | 医療(国公立)                                                  | 2.20E+0                                                         | 3.49E-1                                               | 1.18E+0                                             | 6.81E-1                                                        | 3.51E+0                                     |
| JD362      | 831102      | Medical service (non-profit foundations, etc.)                                              | 医療(公益法人等)                                                | 1.80E+0                                                         | 2.72E-1                                               | 9.80E-1                                             | 5.53E-1                                                        | 3.55E+0                                     |
| JD363      | 831103      | Medical service (medical corporations, etc.)                                                | 医療(医療法人等)                                                | 1.87E+0                                                         | 2.19E-1                                               | 1.03E+0                                             | 6.22E-1                                                        | 3.93E+0                                     |
| JD364      | 831201      | Health and hygiene (public) **                                                              | 保健衛生(国公立)★★                                              | 1.60E+0                                                         | 3.95E-1                                               | 8.56E-1                                             | 3.46E-1                                                        | 2.16E+0                                     |
| JD365      | 831202      | Health and hygiene (profit-making)                                                          | 保健衛生(産業)                                                 | 2.01E+0                                                         | 3.08E-1                                               | 1.28E+0                                             | 4.26E-1                                                        | 2.10E+0                                     |
| JD366      | 831301      | Social insurance (public) **                                                                | 社会保険事業(国公立)★★                                            | 1.55E+0                                                         | 1.40E-1                                               | 1.13E+0                                             | 2.80E-1                                                        | 1.84E+0                                     |
| JD367      | 831302      | Social insurance (private, non-profit) *                                                    | 社会保険事業(非営利)★                                             | 1.80E+0                                                         | 1.93E-1                                               | 1.32E+0                                             | 2.90E-1                                                        | 1.72E+0                                     |
| JD368      | 831303      | Social welfare (public) **                                                                  | 社会福祉(国公立)★★                                              | 1.49E+0                                                         | 2.32E-1                                               | 8.74E-1                                             | 3.87E-1                                                        | 2.53E+0                                     |
| JD369      | 831304      | Social welfare (private, non-profit) *                                                      | 社会福祉(非営利)★                                               | 1.45E+0                                                         | 1.69E-1                                               | 8.81E-1                                             | 3.99E-1                                                        | 2.62E+0                                     |
| JD370      | 831305      | Social welfare (profit-making)                                                              | 社会福祉(産業)                                                 | 1.60E+0                                                         | 2.87E-1                                               | 9.03E-1                                             | 4.09E-1                                                        | 2.47E+0                                     |
| JD371      | 831401      | Nursing care (In-home)                                                                      | 介護(居宅)                                                   | 1.34E+0                                                         | 1.59E-1                                               | 8.19E-1                                             | 3.61E-1                                                        | 2.66E+0                                     |
| JD372      | 831402      | Nursing care (In-facility)                                                                  | 介護(施設)                                                   | 1.60E+0                                                         | 2.65E-1                                               | 9.12E-1                                             | 4.23E-1                                                        | 2.65E+0                                     |
| JD373      | 841101      | Private non-profit institutions serving enterprises                                         | 対企業民間非営利団体                                               | 1.84E+0                                                         | 4.13E-1                                               | 9.56E-1                                             | 4.67E-1                                                        | 2.73E+0                                     |
| JD374      | 841102      | Private non-profit institutions serving households, n.e.c. *                                | 対家計民間非営利団体(除別掲)★                                         | 1.23E+0                                                         | 2.36E-1                                               | 7.03E-1                                             | 2.93E-1                                                        | 2.62E+0                                     |
| JD375      | 851101      | Advertising services                                                                        | 広告                                                       | 1.86E+0                                                         | 9.86E-2                                               | 1.25E+0                                             | 5.09E-1                                                        | 3.29E+0                                     |
| JD376      | 851201      | Goods rental and leasing (except car rental)                                                | 物品賃貸業(除貸自動車)                                             | 8.92E-1                                                         | 3.29E-2                                               | 5.43E-1                                             | 3.16E-1                                                        | 3.73E+0                                     |
| JD377      | 851301      | Car rental and leasing                                                                      | 貸自動車業                                                    | 1.04E+0                                                         | 2.73E-1                                               | 4.84E-1                                             | 2.83E-1                                                        | 3.43E+0                                     |
| JD378      | 851410      | Repair of motor vehicles                                                                    | 自動車修理                                                    | 2.65E+0                                                         | 5.73E-2                                               | 1.73E+0                                             | 8.61E-1                                                        | 3.06E+0                                     |
| JD379      | 851510      | Repair of machine                                                                           | 機械修理                                                     | 3.18E+0                                                         | 3.81E-2                                               | 1.93E+0                                             | 1.22E+0                                                        | 3.58E+0                                     |
| JD380      | 851901      | Building maintenance services                                                               | 建物サービス                                                   | 8.31E-1                                                         | 1.06E-1                                               | 5.06E-1                                             | 2.19E-1                                                        | 3.18E+0                                     |
| JD381      | 851902      | Judicial, financial and accounting services                                                 | 法務・財務・会計サービス                                             | 6.40E-1                                                         | 1.44E-1                                               | 3.52E-1                                             | 1.44E-1                                                        | 2.72E+0                                     |
| JD382      | 851903      | Civil engineering and construction services                                                 | 土木建築サービス                                                 | 1.30E+0                                                         | 2.32E-1                                               | 7.68E-1                                             | 2.96E-1                                                        | 2.39E+0                                     |
| JD383      | 851904      | Worker dispatching services                                                                 | 労働者派遣サービス                                                | 1.48E-1                                                         | 1.63E-2                                               | 9.62E-2                                             | 3.54E-2                                                        | 2.68E+0                                     |
| JD384      | 851909      | Other business services                                                                     | その他の対事業所サービス                                             | 6.92E-1                                                         | 3.81E-2                                               | 4.78E-1                                             | 1.76E-1                                                        | 2.93E+0                                     |
| JD385      | 861101      | Movie theaters                                                                              | 映画館                                                      | 3.25E+0                                                         | 5.03E-1                                               | 1.88E+0                                             | 8.73E-1                                                        | 4.98E+0                                     |
| JD386      | 861102      | Performances (except otherwise classified), theatrical companies                            | 興行場(除別掲)・興行団                                             | 1.45E+0                                                         | 6.52E-2                                               | 9.19E-1                                             | 4.70E-1                                                        | 4.33E+0                                     |
| JD387      | 861103      | Amusement and recreation facilities                                                         | 遊戯場                                                      | 2.76E+0                                                         | 5.76E-1                                               | 1.71E+0                                             | 4.73E-1                                                        | 1.87E+0                                     |
| JD388      | 861104      | Stadiums and companies of bicycle, horse, motorcar and motorboat races                      | 競輪・競馬等の競走場・競技団                                           | 1.66E+0                                                         | 2.10E-1                                               | 1.01E+0                                             | 4.38E-1                                                        | 3.13E+0                                     |
| JD389      | 861105      | Sport facility service, public gardens and amusement parks                                  | スポーツ施設提供業・公園・遊園地                                         | 1.76E+0                                                         | 2.96E-1                                               | 1.07E+0                                             | 3.97E-1                                                        | 2.44E+0                                     |
| JD390      | 861109      | Other amusement and recreation services                                                     | その他の娯楽                                                   | 1.91E+0                                                         | 2.56E-1                                               | 1.31E+0                                             | 3.46E-1                                                        | 2.32E+0                                     |
| JD391      | 861201      | General eating and drinking places (except coffee shops)                                    | 一般飲食店(除喫茶店)                                              | 3.30E+0                                                         | 3.30E-1                                               | 1.65E+0                                             | 1.33E+0                                                        | 4.36E+0                                     |
| JD392      | 861202      | Coffee shops                                                                                | 喫茶店                                                      | 3.19E+0                                                         | 4.81E-1                                               | 1.62E+0                                             | 1.09E+0                                                        | 3.49E+0                                     |
| JD393      | 861203      | Eating and drinking places for pleasures                                                    | 遊興飲食店                                                    | 2.47E+0                                                         | 3.41E-1                                               | 1.23E+0                                             | 8.94E-1                                                        | 3.86E+0                                     |
| JD394      | 861301      | Hotels                                                                                      | 宿泊業                                                      | 3.24E+0                                                         | 4.16E-1                                               | 1.88E+0                                             | 9.41E-1                                                        | 3.14E+0                                     |
| JD395      | 861401      | Cleaning                                                                                    | 洗濯業                                                      | 2.30E+0                                                         | 7.60E-1                                               | 1.19E+0                                             | 3.55E-1                                                        | 1.89E+0                                     |
| JD396      | 861402      | Barber shops                                                                                | 理容業                                                      | 1.39E+0                                                         | 5.94E-1                                               | 5.14E-1                                             | 2.82E-1                                                        | 2.25E+0                                     |
| JD397      | 861403      | Beauty shops                                                                                | 美容業                                                      | 1.21E+0                                                         | 3.31E-1                                               | 5.92E-1                                             | 2.89E-1                                                        | 2.44E+0                                     |
| JD398      | 861404      | Public baths                                                                                | 浴場業                                                      | 5.02E+0                                                         | 2.54E+0                                               | 1.87E+0                                             | 6.03E-1                                                        | 1.61E+0                                     |
| JD399      | 861409      | Other cleaning, barber shops, beauty shops and public baths                                 | その他の洗濯・理容・美容・浴場業                                         | 1.83E+0                                                         | 4.93E-1                                               | 9.21E-1                                             | 4.19E-1                                                        | 2.43E+0                                     |
| JD400      | 861901      | Photographic studios                                                                        | 写真業                                                      | 1.46E+0                                                         | 8.35E-2                                               | 9.55E-1                                             | 4.20E-1                                                        | 3.05E+0                                     |
| JD401      | 861902      | Ceremonial occasions                                                                        | 冠婚葬祭業                                                    | 2.78E+0                                                         | 6.22E-1                                               | 1.61E+0                                             | 5.52E-1                                                        | 2.20E+0                                     |
| JD402      | 861903      | Miscellaneous repairs, n.e.c.                                                               | 各種修理業(除別掲)                                               | 2.19E+0                                                         | 3.38E-1                                               | 1.37E+0                                             | 4.77E-1                                                        | 2.28E+0                                     |
| JD403      | 861904      | Supplementary tutorial schools, instruction services for arts, culture and technical skills | 個人教授業                                                    | 1.25E+0                                                         | 1.29E-1                                               | 8.90E-1                                             | 2.33E-1                                                        | 2.08E+0                                     |
| JD404      | 861909      | Other personal services                                                                     | その他の対個人サービス                                              | 1.29E+0                                                         | 2.28E-1                                               | 7.57E-1                                             | 3.00E-1                                                        | 2.63E+0                                     |
| JD405      | 890000      | Office supplies                                                                             | 事務用品                                                     | 5.40E+0                                                         | 0.00E+0                                               | 3.58E+0                                             | 1.82E+0                                                        | 3.09E+0                                     |
| JD406      | 900000      | Activities not elsewhere classified                                                         | 分類不明                                                     | 3.29E+0                                                         | 5.37E-1                                               | 2.03E+0                                             | 7.19E-1                                                        | 2.42E+0                                     |





Table A3: Embodied global CO<sub>2</sub> intensities of Japanese goods and services based on the producer's price in 2005 [3/5]

| Sector no. | Sector code | Sector name<br>[Japanese domestic commodity]               | Sector name in Japanese<br>[Japanese domestic commodity] | Embodied global CO <sub>2</sub> intensities based on producer price in 2005 |                                                       |                                                     |                                                                |                                             |
|------------|-------------|------------------------------------------------------------|----------------------------------------------------------|-----------------------------------------------------------------------------|-------------------------------------------------------|-----------------------------------------------------|----------------------------------------------------------------|---------------------------------------------|
|            |             |                                                            |                                                          | Total                                                                       | (D) Direct emissions<br>in Japan during<br>production | (S) Induced<br>emissions in Japan<br>through supply | (F) Induced emissions<br>in foreign country's<br>supply chains | Coefficient of variance<br>of the intensity |
|            |             |                                                            |                                                          | tCO <sub>2</sub> /M-JPY                                                     | tCO <sub>2</sub> /M-JPY                               | tCO <sub>2</sub> /M-JPY                             | tCO <sub>2</sub> /M-JPY                                        | %                                           |
| JD184      | 272203      | Non-ferrous metal castings and forgings                    | 非鉄金属素形材                                                  | 7.16E+0                                                                     | 8.32E-1                                               | 2.05E+0                                             | 4.28E+0                                                        | 5.79E+0                                     |
| JD185      | 272204      | Nuclear fuels                                              | 核燃料                                                      | 3.92E+0                                                                     | 1.44E-1                                               | 8.62E-1                                             | 2.91E+0                                                        | 8.13E+0                                     |
| JD186      | 272209      | Other non-ferrous metal products                           | その他の非鉄金属製品                                               | 9.80E+0                                                                     | 3.36E-1                                               | 1.40E+0                                             | 8.07E+0                                                        | 8.71E+0                                     |
| JD187      | 281101      | Metal products for construction                            | 建設用金属製品                                                  | 8.55E+0                                                                     | 1.48E-1                                               | 6.62E+0                                             | 1.78E+0                                                        | 1.88E+0                                     |
| JD188      | 281201      | Metal products for architecture                            | 建築用金属製品                                                  | 6.19E+0                                                                     | 2.67E-1                                               | 3.15E+0                                             | 2.77E+0                                                        | 5.49E+0                                     |
| JD189      | 289101      | Gas and oil appliances and heating and cooking apparatus   | ガス・石油機器及び暖房機器                                            | 6.64E+0                                                                     | 1.88E-1                                               | 4.52E+0                                             | 1.93E+0                                                        | 2.88E+0                                     |
| JD190      | 289901      | Bolts, nuts, rivets and springs                            | ボルト・ナット・リベット及びスプリング                                      | 7.12E+0                                                                     | 2.61E-1                                               | 4.68E+0                                             | 2.18E+0                                                        | 4.98E+0                                     |
| JD191      | 289902      | Metal containers, fabricated plate and sheet metal         | 金属製容器及び製缶板金製品                                            | 6.35E+0                                                                     | 3.85E-1                                               | 4.40E+0                                             | 1.56E+0                                                        | 3.18E+0                                     |
| JD192      | 289903      | Plumber's supplies, powder metallurgy products and tools   | 配管工事付属品・粉末冶金製品・道具類                                       | 5.38E+0                                                                     | 2.86E-1                                               | 2.86E+0                                             | 2.23E+0                                                        | 4.28E+0                                     |
| JD193      | 289909      | Other metal products                                       | その他の金属製品                                                 | 5.71E+0                                                                     | 3.02E-1                                               | 3.45E+0                                             | 1.96E+0                                                        | 3.93E+0                                     |
| JD194      | 301101      | Boilers                                                    | ボイラ                                                      | 3.14E+0                                                                     | 1.63E-1                                               | 2.12E+0                                             | 8.50E-1                                                        | 2.59E+0                                     |
| JD195      | 301102      | Turbines                                                   | タービン                                                     | 4.16E+0                                                                     | 1.87E-1                                               | 2.79E+0                                             | 1.18E+0                                                        | 2.69E+0                                     |
| JD196      | 301103      | Engines                                                    | 原動機                                                      | 4.96E+0                                                                     | 1.34E-1                                               | 3.42E+0                                             | 1.41E+0                                                        | 2.58E+0                                     |
| JD197      | 301201      | Conveyors                                                  | 運搬機械                                                     | 4.46E+0                                                                     | 5.80E-2                                               | 2.76E+0                                             | 1.64E+0                                                        | 3.44E+0                                     |
| JD198      | 301301      | Refrigerators and air conditioning apparatus               | 冷凍機・温湿調整装置                                               | 3.71E+0                                                                     | 8.48E-2                                               | 2.09E+0                                             | 1.53E+0                                                        | 3.64E+0                                     |
| JD199      | 301901      | Pumps and compressors                                      | ポンプ及び圧縮機                                                 | 4.81E+0                                                                     | 7.99E-2                                               | 3.27E+0                                             | 1.46E+0                                                        | 2.70E+0                                     |
| JD200      | 301902      | Machinists' precision tools                                | 機械工具                                                     | 4.54E+0                                                                     | 1.04E-1                                               | 2.77E+0                                             | 1.66E+0                                                        | 3.97E+0                                     |
| JD201      | 301909      | Other general industrial machinery and equipment           | その他の一般産業機械及び装置                                           | 4.61E+0                                                                     | 1.37E-1                                               | 3.24E+0                                             | 1.23E+0                                                        | 2.38E+0                                     |
| JD202      | 302101      | Machinery and equipment for construction and mining        | 建設・鉱山機械                                                  | 4.40E+0                                                                     | 1.18E-1                                               | 3.07E+0                                             | 1.21E+0                                                        | 2.56E+0                                     |
| JD203      | 302201      | Chemical machinery                                         | 化学機械                                                     | 3.33E+0                                                                     | 6.08E-2                                               | 2.35E+0                                             | 9.24E-1                                                        | 2.53E+0                                     |
| JD204      | 302301      | Industrial robots                                          | 産業用ロボット                                                  | 3.67E+0                                                                     | 5.33E-2                                               | 2.45E+0                                             | 1.16E+0                                                        | 3.07E+0                                     |
| JD205      | 302401      | Metal machine tools                                        | 金属工作機械                                                   | 3.58E+0                                                                     | 3.20E-2                                               | 2.58E+0                                             | 9.64E-1                                                        | 2.61E+0                                     |
| JD206      | 302402      | Metal processing machinery                                 | 金属加工機械                                                   | 4.30E+0                                                                     | 6.78E-2                                               | 3.26E+0                                             | 9.69E-1                                                        | 2.15E+0                                     |
| JD207      | 302901      | Machinery for agricultural use                             | 農業用機械                                                    | 4.16E+0                                                                     | 1.61E-1                                               | 3.03E+0                                             | 9.77E-1                                                        | 2.14E+0                                     |
| JD208      | 302902      | Textile machinery                                          | 繊維機械                                                     | 4.12E+0                                                                     | 1.12E-1                                               | 2.65E+0                                             | 1.36E+0                                                        | 3.06E+0                                     |
| JD209      | 302903      | Food processing machinery and equipment                    | 食品機械・同装置                                                 | 4.90E+0                                                                     | 6.49E-2                                               | 3.59E+0                                             | 1.25E+0                                                        | 2.36E+0                                     |
| JD210      | 302904      | Semiconductor making equipment                             | 半導体製造装置                                                  | 3.14E+0                                                                     | 4.55E-2                                               | 2.12E+0                                             | 9.72E-1                                                        | 3.07E+0                                     |
| JD211      | 302905      | Vacuum equipment and vacuum component                      | 真空装置・真空機器                                                | 4.29E+0                                                                     | 1.03E-1                                               | 3.01E+0                                             | 1.18E+0                                                        | 2.44E+0                                     |
| JD212      | 302909      | Other special machinery for industrial use                 | その他の特殊産業用機械                                              | 3.87E+0                                                                     | 8.43E-2                                               | 2.57E+0                                             | 1.21E+0                                                        | 2.94E+0                                     |
| JD213      | 303101      | Metal molds                                                | 金型                                                       | 4.26E+0                                                                     | 9.61E-2                                               | 3.24E+0                                             | 9.29E-1                                                        | 1.95E+0                                     |
| JD214      | 303102      | Bearings                                                   | ベアリング                                                    | 6.71E+0                                                                     | 1.97E-1                                               | 5.22E+0                                             | 1.30E+0                                                        | 1.71E+0                                     |
| JD215      | 303109      | Other general machines and parts                           | その他の一般機械器具及び部品                                           | 4.46E+0                                                                     | 1.54E-1                                               | 2.89E+0                                             | 1.42E+0                                                        | 2.81E+0                                     |
| JD216      | 311101      | Copy machine                                               | 複写機                                                      | 3.54E+0                                                                     | 6.95E-2                                               | 1.97E+0                                             | 1.50E+0                                                        | 4.84E+0                                     |
| JD217      | 311109      | Other office machines                                      | その他の事務用機械                                                | 2.97E+0                                                                     | 4.27E-2                                               | 1.68E+0                                             | 1.25E+0                                                        | 4.78E+0                                     |
| JD218      | 311201      | Machinery for service industry                             | サービス用機器                                                  | 3.50E+0                                                                     | 5.76E-2                                               | 2.16E+0                                             | 1.27E+0                                                        | 3.86E+0                                     |
| JD219      | 321101      | Rotating electrical equipment                              | 回転電気機械                                                   | 5.17E+0                                                                     | 1.46E-1                                               | 3.08E+0                                             | 1.94E+0                                                        | 3.37E+0                                     |
| JD220      | 321102      | Transformers and reactors                                  | 変圧器・変成器                                                  | 5.04E+0                                                                     | 1.66E-2                                               | 2.70E+0                                             | 2.32E+0                                                        | 4.25E+0                                     |
| JD221      | 321103      | Relay switches and switchboards                            | 開閉制御装置及び配電盤                                              | 3.77E+0                                                                     | 6.62E-2                                               | 2.25E+0                                             | 1.46E+0                                                        | 3.56E+0                                     |
| JD222      | 321104      | Wiring devices and supplies                                | 配線器具                                                     | 3.59E+0                                                                     | 9.88E-2                                               | 1.81E+0                                             | 1.69E+0                                                        | 4.05E+0                                     |
| JD223      | 321105      | Electrical equipment for internal combustion engines       | 内燃機関電装品                                                  | 3.72E+0                                                                     | 6.81E-2                                               | 2.34E+0                                             | 1.32E+0                                                        | 3.22E+0                                     |
| JD224      | 321109      | Other electrical devices and parts                         | その他の産業用電気機器                                              | 3.81E+0                                                                     | 7.74E-2                                               | 2.11E+0                                             | 1.62E+0                                                        | 3.81E+0                                     |
| JD225      | 322101      | Applied electronic equipment                               | 電子応用装置                                                   | 2.69E+0                                                                     | 1.54E-2                                               | 1.30E+0                                             | 1.38E+0                                                        | 6.43E+0                                     |
| JD226      | 323101      | Electric measuring instruments                             | 電気計測器                                                    | 2.48E+0                                                                     | 3.02E-2                                               | 1.27E+0                                             | 1.18E+0                                                        | 5.79E+0                                     |
| JD227      | 324101      | Electric bulbs                                             | 電球類                                                      | 3.04E+0                                                                     | 3.07E-1                                               | 1.80E+0                                             | 9.32E-1                                                        | 2.99E+0                                     |
| JD228      | 324102      | Electric lighting fixtures and apparatus                   | 電気照明器具                                                   | 3.48E+0                                                                     | 1.49E-1                                               | 1.97E+0                                             | 1.35E+0                                                        | 3.70E+0                                     |
| JD229      | 324103      | Batteries                                                  | 電池                                                       | 5.64E+0                                                                     | 1.93E-1                                               | 2.60E+0                                             | 2.85E+0                                                        | 4.39E+0                                     |
| JD230      | 324109      | Other electrical devices and parts                         | その他の電気機械器具                                               | 5.41E+0                                                                     | 3.82E-1                                               | 1.61E+0                                             | 3.41E+0                                                        | 6.03E+0                                     |
| JD231      | 325101      | Household air-conditioners                                 | 民生用エアコンディショナ                                             | 3.53E+0                                                                     | 6.45E-2                                               | 2.06E+0                                             | 1.40E+0                                                        | 4.09E+0                                     |
| JD232      | 325102      | Household electric appliances (except air-conditioners)    | 民生用電気機器 (除エアコン)                                          | 3.59E+0                                                                     | 3.13E-2                                               | 2.04E+0                                             | 1.51E+0                                                        | 4.06E+0                                     |
| JD233      | 331101      | Video recording and playback equipment                     | ビデオ機器                                                    | 3.53E+0                                                                     | 6.10E-3                                               | 1.76E+0                                             | 1.77E+0                                                        | 5.55E+0                                     |
| JD234      | 331102      | Electric audio equipment                                   | 電気音響機器                                                   | 3.25E+0                                                                     | 5.79E-2                                               | 1.70E+0                                             | 1.50E+0                                                        | 5.12E+0                                     |
| JD235      | 331103      | Radio and television sets                                  | ラジオ・テレビ受信機                                               | 3.13E+0                                                                     | 2.89E-2                                               | 1.75E+0                                             | 1.35E+0                                                        | 4.89E+0                                     |
| JD236      | 332101      | Wired communication equipment                              | 有線電気通信機器                                                 | 3.09E+0                                                                     | 6.34E-2                                               | 1.50E+0                                             | 1.53E+0                                                        | 5.07E+0                                     |
| JD237      | 332102      | Cellular phones                                            | 携帯電話機                                                    | 3.01E+0                                                                     | 6.02E-2                                               | 1.42E+0                                             | 1.53E+0                                                        | 5.71E+0                                     |
| JD238      | 332103      | Radio communication equipment (except cellular phones)     | 無線電気通信機器 (除携帯電話機)                                        | 3.16E+0                                                                     | 6.12E-2                                               | 1.39E+0                                             | 1.71E+0                                                        | 5.68E+0                                     |
| JD239      | 332109      | Other communication equipment                              | その他の電気通信機器                                               | 2.76E+0                                                                     | 8.97E-2                                               | 1.49E+0                                             | 1.18E+0                                                        | 4.42E+0                                     |
| JD240      | 333101      | Personal Computers                                         | パーソナルコンピュータ                                              | 3.15E+0                                                                     | 2.06E-2                                               | 1.27E+0                                             | 1.86E+0                                                        | 7.47E+0                                     |
| JD241      | 333102      | Electronic computing equipment (except personal computers) | 電子計算機本体 (除パソコン)                                          | 2.65E+0                                                                     | 2.27E-2                                               | 1.11E+0                                             | 1.52E+0                                                        | 7.40E+0                                     |
| JD242      | 333103      | Electronic computing equipment (accessory equipment)       | 電子計算機付属装置                                                | 2.91E+0                                                                     | 1.50E-2                                               | 1.44E+0                                             | 1.46E+0                                                        | 6.27E+0                                     |
| JD243      | 341101      | Semiconductor devices                                      | 半導体素子                                                    | 3.03E+0                                                                     | 3.78E-1                                               | 1.61E+0                                             | 1.05E+0                                                        | 3.02E+0                                     |
| JD244      | 341102      | Integrated circuits                                        | 集積回路                                                     | 3.72E+0                                                                     | 2.43E-1                                               | 2.14E+0                                             | 1.34E+0                                                        | 3.64E+0                                     |
| JD245      | 342101      | Electron tubes                                             | 電子管                                                      | 5.86E+0                                                                     | 4.06E-1                                               | 2.56E+0                                             | 2.89E+0                                                        | 6.05E+0                                     |
| JD246      | 342102      | Liquid crystal element                                     | 液晶素子                                                     | 3.29E+0                                                                     | 8.91E-2                                               | 1.69E+0                                             | 1.51E+0                                                        | 5.96E+0                                     |
| JD247      | 342103      | Magnetic tapes and discs                                   | 磁気テープ・磁気ディスク                                             | 5.09E+0                                                                     | 9.92E-1                                               | 2.95E+0                                             | 1.15E+0                                                        | 2.34E+0                                     |
| JD248      | 342109      | Other electronic components                                | その他の電子部品                                                 | 3.88E+0                                                                     | 1.21E-1                                               | 2.00E+0                                             | 1.76E+0                                                        | 4.18E+0                                     |
| JD249      | 351101      | Passenger motor cars                                       | 乗用車                                                      | 4.27E+0                                                                     | 6.03E-2                                               | 2.83E+0                                             | 1.37E+0                                                        | 3.05E+0                                     |
| JD250      | 352101      | Trucks, buses and other cars                               | トラック・バス・その他の自動車                                          | 4.35E+0                                                                     | 1.25E-1                                               | 2.83E+0                                             | 1.40E+0                                                        | 3.03E+0                                     |
| JD251      | 353101      | Two-wheel motor vehicles                                   | 二輪自動車                                                    | 3.81E+0                                                                     | 7.68E-2                                               | 2.35E+0                                             | 1.39E+0                                                        | 3.31E+0                                     |
| JD252      | 354101      | Motor vehicle bodies                                       | 自動車車体                                                    | 5.85E+0                                                                     | 1.90E-1                                               | 3.99E+0                                             | 1.67E+0                                                        | 3.62E+0                                     |
| JD253      | 354102      | Internal combustion engines for motor vehicles and parts   | 自動車用内燃機関・同部分品                                            | 4.80E+0                                                                     | 2.52E-1                                               | 2.89E+0                                             | 1.65E+0                                                        | 2.94E+0                                     |
| JD254      | 354103      | Motor vehicle parts and accessories                        | 自動車部品                                                    | 4.50E+0                                                                     | 1.60E-1                                               | 2.93E+0                                             | 1.41E+0                                                        | 2.90E+0                                     |
| JD255      | 361101      | Steel ships                                                | 鋼船                                                       | 7.88E+0                                                                     | 9.30E-2                                               | 6.12E+0                                             | 1.67E+0                                                        | 2.09E+0                                     |
| JD256      | 361102      | Ships (except steel ships)                                 | その他の船舶                                                   | 3.44E+0                                                                     | 8.40E-2                                               | 2.48E+0                                             | 8.82E-1                                                        | 2.38E+0                                     |
| JD257      | 361103      | Internal combustion engines for vessels                    | 船用内燃機関                                                   | 6.12E+0                                                                     | 1.02E+0                                               | 3.96E+0                                             | 1.14E+0                                                        | 1.69E+0                                     |
| JD258      | 361110      | Repair of ships                                            | 船舶修理                                                     | 4.30E+0                                                                     | 4.50E-2                                               | 3.19E+0                                             | 1.07E+0                                                        | 2.47E+0                                     |
| JD259      | 362101      | Rolling stock                                              | 鉄道車両                                                     | 5.26E+0                                                                     | 1.65E-1                                               | 3.70E+0                                             | 1.40E+0                                                        | 2.36E+0                                     |
| JD260      | 362110      | Repair of rolling stock                                    | 鉄道車両修理                                                   | 7.59E+0                                                                     | 1.87E+0                                               | 4.12E+0                                             | 1.60E+0                                                        | 1.91E+0                                     |
| JD261      | 362201      | Aircrafts                                                  | 航空機                                                      | 3.04E+0                                                                     | 4.88E-1                                               | 1.31E+0                                             | 1.25E+0                                                        | 5.32E+0                                     |
| JD262      | 362210      | Repair of aircrafts                                        | 航空機修理                                                    | 2.70E+0                                                                     | 2.06E-1                                               | 6.62E-1                                             | 1.83E+0                                                        | 1.51E+1                                     |
| JD263      | 362901      | Bicycles                                                   | 自転車                                                      | 6.42E+0                                                                     | 1.06E+0                                               | 2.61E+0                                             | 2.74E+0                                                        | 4.18E+0                                     |
| JD264      | 362909      | Other transport equipment                                  | その他の輸送機械                                                 | 4.81E+0                                                                     | 2.42E-1                                               | 3.40E+0                                             | 1.17E+0                                                        | 2.17E+0                                     |
| JD265      | 371101      | Camera                                                     | カメラ                                                      | 2.72E+0                                                                     | 9.43E-2                                               | 1.45E+0                                             | 1.17E+0                                                        | 4.69E+0                                     |
| JD266      | 371109      | Other photographic and optical instruments                 | その他の光学機械                                                 | 3.64E+0                                                                     | 1.22E-1                                               | 2.02E+0                                             | 1.50E+0                                                        | 4.41E+0                                     |



Table A3: Embodied global CO<sub>2</sub> intensities of Japanese goods and services based on the producer's price in 2005 [4/5]

| Sector no. | Sector code | Sector name<br>[Japanese domestic commodity]                      | Sector name in Japanese<br>[Japanese domestic commodity] | Embodied global CO <sub>2</sub> intensities based on producer price in 2005 |                                                       |                                                     |                                                                |                                             |
|------------|-------------|-------------------------------------------------------------------|----------------------------------------------------------|-----------------------------------------------------------------------------|-------------------------------------------------------|-----------------------------------------------------|----------------------------------------------------------------|---------------------------------------------|
|            |             |                                                                   |                                                          | Total                                                                       | (D) Direct emissions<br>in Japan during<br>production | (S) Induced<br>emissions in Japan<br>through supply | (F) Induced emissions<br>in foreign country's<br>supply chains | Coefficient of variance<br>of the intensity |
|            |             |                                                                   |                                                          |                                                                             |                                                       |                                                     |                                                                |                                             |
| JD267      | 371201      | Watches and clocks                                                | 時計                                                       | 3.43E+0                                                                     | 1.23E-1                                               | 1.64E+0                                             | 1.67E+0                                                        | 1.03E+1                                     |
| JD268      | 371901      | Professional and scientific instruments                           | 理化学機械器具                                                  | 2.70E+0                                                                     | 1.37E-1                                               | 1.87E+0                                             | 6.89E-1                                                        | 2.35E+0                                     |
| JD269      | 371902      | Analytical instruments, testing<br>machine, measuring instruments | 分析器・試験機・計量器・測定器                                          | 2.60E+0                                                                     | 6.75E-2                                               | 1.59E+0                                             | 9.33E-1                                                        | 3.54E+0                                     |
| JD270      | 371903      | Medical instruments                                               | 医療用機械器具                                                  | 2.98E+0                                                                     | 1.79E-1                                               | 1.71E+0                                             | 1.09E+0                                                        | 3.37E+0                                     |
| JD271      | 391101      | Toys and games                                                    | がん具                                                      | 3.65E+0                                                                     | 1.71E-1                                               | 1.61E+0                                             | 1.87E+0                                                        | 5.24E+0                                     |
| JD272      | 391102      | Sporting and athletic goods                                       | 運動用品                                                     | 4.12E+0                                                                     | 1.63E-1                                               | 2.64E+0                                             | 1.32E+0                                                        | 3.10E+0                                     |
| JD273      | 391901      | Musical instruments                                               | 楽器                                                       | 2.94E+0                                                                     | 5.33E-2                                               | 1.76E+0                                             | 1.13E+0                                                        | 3.41E+0                                     |
| JD274      | 391902      | Audio and video records, other<br>information recording media     | 情報記録物                                                    | 2.52E+0                                                                     | 4.31E-2                                               | 1.75E+0                                             | 7.22E-1                                                        | 2.98E+0                                     |
| JD275      | 391903      | Stationery                                                        | 筆記具・文具                                                   | 3.07E+0                                                                     | 9.32E-2                                               | 2.03E+0                                             | 9.48E-1                                                        | 3.27E+0                                     |
| JD276      | 391904      | Jewelry and adornments                                            | 身辺細貨品                                                    | 4.18E+0                                                                     | 6.92E-2                                               | 1.39E+0                                             | 2.72E+0                                                        | 7.97E+0                                     |
| JD277      | 391905      | "Tatami" (straw matting) and straw<br>products                    | 畳・わら加工品                                                  | 3.22E+0                                                                     | 5.11E-2                                               | 8.52E-1                                             | 2.32E+0                                                        | 7.95E+0                                     |
| JD278      | 391906      | Ordnance                                                          | 武器                                                       | 3.70E+0                                                                     | 5.33E-2                                               | 2.14E+0                                             | 1.51E+0                                                        | 3.78E+0                                     |
| JD279      | 391909      | Miscellaneous manufacturing products                              | その他の製造工業製品                                               | 3.18E+0                                                                     | 5.23E-2                                               | 1.98E+0                                             | 1.15E+0                                                        | 3.53E+0                                     |
| JD280      | 392101      | Reuse and recycling                                               | 再生资源回収・加工処理                                              | 3.37E+0                                                                     | 4.57E-1                                               | 2.56E+0                                             | 3.53E-1                                                        | 1.77E+0                                     |
| JD281      | 411101      | Residential construction (wooden)                                 | 住宅建築(木造)                                                 | 2.88E+0                                                                     | 5.47E-2                                               | 1.75E+0                                             | 1.07E+0                                                        | 3.22E+0                                     |
| JD282      | 411102      | Residential construction (non-wooden)                             | 住宅建築(非木造)                                                | 3.97E+0                                                                     | 1.22E-1                                               | 2.71E+0                                             | 1.14E+0                                                        | 2.57E+0                                     |
| JD283      | 411201      | Non-residential construction (wooden)                             | 非住宅建築(木造)                                                | 3.04E+0                                                                     | 6.45E-2                                               | 1.86E+0                                             | 1.11E+0                                                        | 3.24E+0                                     |
| JD284      | 411202      | Non-residential construction (non-<br>wooden)                     | 非住宅建築(非木造)                                               | 4.11E+0                                                                     | 1.41E-1                                               | 2.68E+0                                             | 1.29E+0                                                        | 2.84E+0                                     |
| JD285      | 412101      | Repair of construction                                            | 建設補修                                                     | 3.61E+0                                                                     | 1.75E-1                                               | 2.43E+0                                             | 1.01E+0                                                        | 2.67E+0                                     |
| JD286      | 413101      | Public construction of roads                                      | 道路関係公共事業                                                 | 4.49E+0                                                                     | 4.55E-1                                               | 3.30E+0                                             | 7.31E-1                                                        | 1.71E+0                                     |
| JD287      | 413102      | Public construction of rivers, drainages<br>and others            | 河川・下水道・その他の公共事業                                          | 4.30E+0                                                                     | 3.37E-1                                               | 3.31E+0                                             | 6.57E-1                                                        | 1.54E+0                                     |
| JD288      | 413103      | Agricultural public construction                                  | 農林関係公共事業                                                 | 5.05E+0                                                                     | 5.43E-1                                               | 3.72E+0                                             | 7.83E-1                                                        | 1.62E+0                                     |
| JD289      | 413201      | Railway construction                                              | 鉄道軌道建設                                                   | 4.84E+0                                                                     | 2.08E-1                                               | 3.72E+0                                             | 9.13E-1                                                        | 1.70E+0                                     |
| JD290      | 413202      | Electric power facilities construction                            | 電力施設建設                                                   | 4.51E+0                                                                     | 1.62E-1                                               | 2.75E+0                                             | 1.60E+0                                                        | 3.24E+0                                     |
| JD291      | 413203      | Telecommunication facilities<br>construction                      | 電気通信施設建設                                                 | 3.80E+0                                                                     | 2.38E-1                                               | 2.22E+0                                             | 1.34E+0                                                        | 3.21E+0                                     |
| JD292      | 413209      | Other civil engineering and construction                          | その他の土木建設                                                 | 4.30E+0                                                                     | 2.62E-1                                               | 3.25E+0                                             | 7.91E-1                                                        | 1.73E+0                                     |
| JD293      | 5111001     | Electricity                                                       | 事業用電力                                                    | 2.82E+1                                                                     | 2.46E+1                                               | 1.76E+0                                             | 1.84E+0                                                        | 8.49E-1                                     |
| JD294      | 511104      | On-site power generation                                          | 自家発電                                                     | 6.75E+1                                                                     | 6.30E+1                                               | 2.07E+0                                             | 2.38E+0                                                        | 4.72E-1                                     |
| JD295      | 512101      | Gas supply                                                        | 都市ガス                                                     | 4.82E+0                                                                     | 2.07E-1                                               | 1.40E+0                                             | 3.21E+0                                                        | 1.02E+1                                     |
| JD296      | 512201      | Steam and hot water supply                                        | 熱供給業                                                     | 1.56E+1                                                                     | 1.01E+1                                               | 4.39E+0                                             | 1.09E+0                                                        | 9.55E-1                                     |
| JD297      | 521101      | Water supply                                                      | 上水道・簡易水道                                                 | 1.44E+0                                                                     | 7.44E-2                                               | 1.07E+0                                             | 3.00E-1                                                        | 1.99E+0                                     |
| JD298      | 521102      | Industrial water supply                                           | 工業用水                                                     | 1.58E+0                                                                     | 7.19E-2                                               | 1.29E+0                                             | 2.21E-1                                                        | 1.41E+0                                     |
| JD299      | 521103      | Sewage disposal **                                                | 下水道★★                                                    | 1.01E+1                                                                     | 4.16E+0                                               | 4.75E+0                                             | 1.17E+0                                                        | 1.32E+0                                     |
| JD300      | 521201      | Waste management services (public) **                             | 廃棄物処理(公営)★★                                              | 1.37E+1                                                                     | 1.07E+1                                               | 2.43E+0                                             | 5.17E-1                                                        | 4.89E-1                                     |
| JD301      | 521202      | Waste management services (private)                               | 廃棄物処理(産業)                                                | 5.89E+0                                                                     | 4.23E+0                                               | 1.32E+0                                             | 3.41E-1                                                        | 7.41E-1                                     |
| JD302      | 611101      | Wholesale trade                                                   | 卸売                                                       | 1.19E+0                                                                     | 8.66E-2                                               | 7.75E-1                                             | 3.31E-1                                                        | 8.10E+0                                     |
| JD303      | 611201      | Retail trade                                                      | 小売                                                       | 2.19E+0                                                                     | 3.41E-1                                               | 1.54E+0                                             | 3.02E-1                                                        | 1.67E+0                                     |
| JD304      | 621101      | Financial service                                                 | 金融                                                       | 6.60E-1                                                                     | 1.94E-2                                               | 4.67E-1                                             | 1.74E-1                                                        | 3.65E+0                                     |
| JD305      | 621201      | Life insurance                                                    | 生命保険                                                     | 8.20E-1                                                                     | 3.81E-2                                               | 5.67E-1                                             | 2.16E-1                                                        | 2.98E+0                                     |
| JD306      | 621202      | Non-life insurance                                                | 損害保険                                                     | 6.96E-1                                                                     | 3.63E-2                                               | 5.04E-1                                             | 1.56E-1                                                        | 2.64E+0                                     |
| JD307      | 641101      | Real estate agencies and managers                                 | 不動産仲介・管理業                                                | 1.11E+0                                                                     | 6.96E-2                                               | 8.45E-1                                             | 1.96E-1                                                        | 1.90E+0                                     |
| JD308      | 641102      | Real estate rental service                                        | 不動産賃貸業                                                   | 1.03E+0                                                                     | 1.48E-1                                               | 7.63E-1                                             | 1.22E-1                                                        | 1.39E+0                                     |
| JD309      | 642101      | House rent                                                        | 住宅賃貸料                                                    | 5.50E-1                                                                     | 6.97E-2                                               | 3.46E-1                                             | 1.34E-1                                                        | 2.44E+0                                     |
| JD310      | 642201      | House rent (imputed house rent)                                   | 住宅賃貸料(帰属賃貸)                                              | 2.39E-1                                                                     | 0.00E+0                                               | 1.72E-1                                             | 6.69E-2                                                        | 2.70E+0                                     |
| JD311      | 711101      | Railway transport (passengers)                                    | 鉄道旅客輸送                                                   | 2.90E+0                                                                     | 1.51E-1                                               | 2.32E+0                                             | 4.26E-1                                                        | 1.59E+0                                     |
| JD312      | 711201      | Railway transport (freight)                                       | 鉄道貨物輸送                                                   | 4.66E+0                                                                     | 7.06E-1                                               | 3.39E+0                                             | 5.62E-1                                                        | 1.34E+0                                     |
| JD313      | 712101      | Bus transport service                                             | バス                                                       | 3.14E+0                                                                     | 2.02E+0                                               | 6.00E-1                                             | 5.21E-1                                                        | 2.80E+0                                     |
| JD314      | 712102      | Hired car and taxi transport                                      | ハイヤー・タクシー                                                | 3.22E+0                                                                     | 2.32E+0                                               | 3.74E-1                                             | 5.26E-1                                                        | 2.71E+0                                     |
| JD315      | 712201      | Road freight transport(except Self-<br>transport by private cars) | 道路貨物輸送(除自家輸送)                                            | 3.77E+0                                                                     | 2.47E+0                                               | 7.86E-1                                             | 5.07E-1                                                        | 2.70E+0                                     |
| JD316      | 713101      | Self-transport by private cars<br>(passengers)                    | 自家輸送(旅客自動車)                                              | 1.15E+1                                                                     | 7.84E+0                                               | 1.84E+0                                             | 1.83E+0                                                        | 3.50E+0                                     |
| JD317      | 713201      | Self-transport by private cars (freight)                          | 自家輸送(貨物自動車)                                              | 1.11E+1                                                                     | 7.67E+0                                               | 1.79E+0                                             | 1.64E+0                                                        | 3.13E+0                                     |
| JD318      | 714101      | Ocean transport                                                   | 外洋輸送                                                     | 2.66E+1                                                                     | 1.41E+1                                               | 6.86E-1                                             | 1.18E+1                                                        | 1.64E+1                                     |
| JD319      | 714201      | Coastal and inland water transport                                | 沿海・内水面輸送                                                 | 1.30E+1                                                                     | 1.08E+1                                               | 1.16E+0                                             | 9.56E-1                                                        | 1.32E+0                                     |
| JD320      | 714301      | Harbor transport service                                          | 港湾運送                                                     | 1.68E+0                                                                     | 8.66E-1                                               | 5.72E-1                                             | 2.43E-1                                                        | 1.87E+0                                     |
| JD321      | 715101      | Air transport                                                     | 航空輸送                                                     | 1.18E+1                                                                     | 9.17E+0                                               | 8.71E-1                                             | 1.74E+0                                                        | 2.05E+0                                     |
| JD322      | 716101      | Consigned freight forwarding                                      | 貨物利用運送                                                   | 1.50E+0                                                                     | 5.56E-1                                               | 6.73E-1                                             | 2.75E-1                                                        | 2.39E+0                                     |
| JD323      | 717101      | Storage facility service                                          | 倉庫                                                       | 2.25E+0                                                                     | 7.20E-2                                               | 1.90E+0                                             | 2.82E-1                                                        | 1.31E+0                                     |
| JD324      | 718101      | Packing service                                                   | こん包                                                      | 2.34E+0                                                                     | 8.14E-2                                               | 1.64E+0                                             | 6.19E-1                                                        | 2.46E+0                                     |
| JD325      | 718901      | Facility service for road transport                               | 道路輸送施設提供                                                 | 1.32E+0                                                                     | 7.61E-2                                               | 1.04E+0                                             | 2.05E-1                                                        | 1.59E+0                                     |
| JD326      | 718902      | Port and water traffic control **                                 | 水運施設管理★★                                                 | 1.87E+0                                                                     | 6.68E-1                                               | 8.55E-1                                             | 3.45E-1                                                        | 1.89E+0                                     |
| JD327      | 718903      | Services relating to water transport                              | その他の水運付帯サービス                                             | 7.04E-1                                                                     | 1.53E-1                                               | 4.12E-1                                             | 1.38E-1                                                        | 2.13E+0                                     |
| JD328      | 718904      | Airport and air traffic control (public) **                       | 航空施設管理(国公営)★★                                            | 1.99E+0                                                                     | 9.31E-2                                               | 1.53E+0                                             | 3.73E-1                                                        | 1.90E+0                                     |
| JD329      | 718905      | Airport and air traffic control                                   | 航空施設管理(産業)                                               | 2.53E+0                                                                     | 4.21E-1                                               | 1.73E+0                                             | 3.80E-1                                                        | 1.55E+0                                     |
| JD330      | 718906      | Services relating to air transport                                | その他の航空付帯サービス                                             | 1.23E+0                                                                     | 1.56E-1                                               | 8.62E-1                                             | 2.14E-1                                                        | 1.80E+0                                     |
| JD331      | 718909      | Travel agency and other services<br>relating to transport         | 旅行・その他の運輸付帯サービス                                          | 9.19E-1                                                                     | 4.72E-2                                               | 6.20E-1                                             | 2.52E-1                                                        | 3.45E+0                                     |
| JD332      | 731101      | Postal service*                                                   | 郵便・信書便                                                   | 1.14E+0                                                                     | 1.50E-1                                               | 7.91E-1                                             | 2.02E-1                                                        | 2.92E+0                                     |
| JD333      | 731201      | Fixed telecommunication                                           | 固定電気通信                                                   | 1.11E+0                                                                     | 5.61E-2                                               | 8.08E-1                                             | 2.44E-1                                                        | 2.78E+0                                     |
| JD334      | 731202      | Mobile telecommunication                                          | 移動電気通信                                                   | 8.05E-1                                                                     | 6.26E-2                                               | 5.51E-1                                             | 1.92E-1                                                        | 2.57E+0                                     |
| JD335      | 731203      | Other telecommunication                                           | その他の電気通信                                                 | 1.42E+0                                                                     | 5.36E-2                                               | 1.05E+0                                             | 3.12E-1                                                        | 2.49E+0                                     |
| JD336      | 731909      | Other services relating to<br>communication                       | その他の通信サービス                                               | 1.37E+0                                                                     | 1.39E-1                                               | 9.78E-1                                             | 2.56E-1                                                        | 1.93E+0                                     |
| JD337      | 732101      | Public broadcasting                                               | 公共放送                                                     | 1.57E+0                                                                     | 5.37E-2                                               | 1.19E+0                                             | 3.28E-1                                                        | 2.68E+0                                     |
| JD338      | 732102      | Private broadcasting                                              | 民間放送                                                     | 1.39E+0                                                                     | 1.11E-1                                               | 8.20E-1                                             | 4.63E-1                                                        | 5.14E+0                                     |
| JD339      | 732103      | Cable broadcasting                                                | 有線放送                                                     | 1.23E+0                                                                     | 8.26E-2                                               | 8.31E-1                                             | 3.14E-1                                                        | 2.80E+0                                     |
| JD340      | 733101      | Information services                                              | 情報サービス                                                   | 9.73E-1                                                                     | 3.16E-2                                               | 7.27E-1                                             | 2.14E-1                                                        | 2.56E+0                                     |
| JD341      | 734101      | Internet based services                                           | インターネット附随サービス                                            | 1.32E+0                                                                     | 3.75E-2                                               | 9.78E-1                                             | 3.02E-1                                                        | 2.57E+0                                     |
| JD342      | 735101      | Image information production and<br>distribution industry         | 映像情報制作・配給業                                               | 2.03E+0                                                                     | 1.73E-1                                               | 9.18E-1                                             | 9.41E-1                                                        | 1.04E+1                                     |
| JD343      | 735102      | Newspaper                                                         | 新聞                                                       | 3.57E+0                                                                     | 2.07E-2                                               | 2.65E+0                                             | 9.01E-1                                                        | 2.65E+0                                     |
| JD344      | 735103      | Publication                                                       | 出版                                                       | 2.78E+0                                                                     | 1.93E-2                                               | 2.24E+0                                             | 5.21E-1                                                        | 2.07E+0                                     |
| JD345      | 735104      | News syndicates and private detective<br>agencies                 | ニュース供給・興信所                                               | 9.68E-1                                                                     | 8.92E-3                                               | 6.93E-1                                             | 2.67E-1                                                        | 3.84E+0                                     |
| JD346      | 811101      | Public administration (central) **                                | 公務(中央)★★                                                 | 1.66E+0                                                                     | 2.41E-1                                               | 8.95E-1                                             | 5.20E-1                                                        | 3.83E+0                                     |
| JD347      | 811201      | Public administration (local) **                                  | 公務(地方)★★                                                 | 1.36E+0                                                                     | 3.32E-1                                               | 8.33E-1                                             | 1.93E-1                                                        | 1.74E+0                                     |
| JD348      | 821101      | School education (public) **                                      | 学校教育(国公立)★★                                              | 6.95E-1                                                                     | 1.20E-1                                               | 4.80E-1                                             | 9.44E-2                                                        | 1.54E+0                                     |
| JD349      | 821102      | School education (private) **                                     | 学校教育(私立)★                                                | 1.26E+0                                                                     | 2.17E-1                                               | 7.74E-1                                             | 2.67E-1                                                        | 2.18E+0                                     |
| JD350      | 821301      | Social education (public) **                                      | 社会教育(国公立)★★                                              | 1.95E+0                                                                     | 2.99E-1                                               | 1.33E+0                                             | 3.28E-1                                                        | 1.76E+0                                     |
| JD351      | 821302      | Social education (private, non-profit) *                          | 社会教育(非営利)★                                               | 2.84E+0                                                                     | 2.00E-1                                               | 2.06E+0                                             | 5.78E-1                                                        | 2.01E+0                                     |
| JD352      | 821303      | Other educational and training<br>institutions (public) **        | その他の教育訓練機関(国公立)★                                         | 4.66E+0                                                                     | 2.18E+0                                               | 1.84E+0                                             | 6.34E-1                                                        | 1.85E+0                                     |

Table A3: Embodied global CO<sub>2</sub> intensities of Japanese goods and services based on the produce's price in 2005 [5/5]

| Sector no. | Sector code | Sector name<br>[Japanese domestic commodity]                                                | Sector name in Japanese<br>[Japanese domestic commodity] | Embodied global CO <sub>2</sub> intensities based on producer price in 2005 |                                                       |                                                     |                                                                |                                             |
|------------|-------------|---------------------------------------------------------------------------------------------|----------------------------------------------------------|-----------------------------------------------------------------------------|-------------------------------------------------------|-----------------------------------------------------|----------------------------------------------------------------|---------------------------------------------|
|            |             |                                                                                             |                                                          | Total                                                                       | (D) Direct emissions<br>in Japan during<br>production | (S) Induced<br>emissions in Japan<br>through supply | (F) Induced emissions<br>in foreign country's<br>supply chains | Coefficient of variance<br>of the intensity |
|            |             |                                                                                             |                                                          | tCO <sub>2</sub> /M-JPY                                                     | tCO <sub>2</sub> /M-JPY                               | tCO <sub>2</sub> /M-JPY                             | tCO <sub>2</sub> /M-JPY                                        | %                                           |
| JD353      | 821304      | Other educational and training institutions (profit-making)                                 | その他の教育訓練機関(産業)                                           | 2.64E+0                                                                     | 1.53E+0                                               | 7.50E-1                                             | 3.59E-1                                                        | 2.04E+0                                     |
| JD354      | 822101      | Research institutes for natural science (public) **                                         | 自然科学研究機関(国公立)★★                                          | 3.53E+0                                                                     | 7.01E-1                                               | 2.13E+0                                             | 6.97E-1                                                        | 2.12E+0                                     |
| JD355      | 822102      | Research institutes for cultural and social science (public) **                             | 人文科学研究機関(国公立)★★                                          | 2.83E+0                                                                     | 9.72E-1                                               | 1.31E+0                                             | 5.38E-1                                                        | 2.33E+0                                     |
| JD356      | 822103      | Research institutes for natural sciences (private, non-profit) *                            | 自然科学研究機関(非営利)★                                           | 2.40E+0                                                                     | 5.43E-1                                               | 1.26E+0                                             | 6.05E-1                                                        | 2.99E+0                                     |
| JD357      | 822104      | Research institutes for cultural and social science (private, non-profit) *                 | 人文科学研究機関(非営利)★                                           | 1.47E+0                                                                     | 2.34E-1                                               | 9.06E-1                                             | 3.25E-1                                                        | 2.47E+0                                     |
| JD358      | 822105      | Research institutes for natural sciences (profit-making)                                    | 自然科学研究機関(産業)                                             | 5.27E+0                                                                     | 1.96E+0                                               | 2.48E+0                                             | 8.20E-1                                                        | 2.06E+0                                     |
| JD359      | 822106      | Research institutes for cultural and social science (profit-making)                         | 人文科学研究機関(産業)                                             | 1.34E+0                                                                     | 2.19E-1                                               | 8.15E-1                                             | 3.10E-1                                                        | 2.60E+0                                     |
| JD360      | 822201      | Research and development (intra-enterprise)                                                 | 企業内研究開発                                                  | 2.52E+0                                                                     | 4.44E-1                                               | 1.56E+0                                             | 5.16E-1                                                        | 2.11E+0                                     |
| JD361      | 831101      | Medical service (public)                                                                    | 医療(国公立)                                                  | 2.03E+0                                                                     | 3.36E-1                                               | 1.12E+0                                             | 5.66E-1                                                        | 3.01E+0                                     |
| JD362      | 831102      | Medical service (non-profit foundations, etc.)                                              | 医療(公益法人等)                                                | 1.66E+0                                                                     | 2.59E-1                                               | 9.36E-1                                             | 4.67E-1                                                        | 3.12E+0                                     |
| JD363      | 831103      | Medical service (medical corporations, etc.)                                                | 医療(医療法人等)                                                | 1.72E+0                                                                     | 2.05E-1                                               | 9.87E-1                                             | 5.25E-1                                                        | 3.42E+0                                     |
| JD364      | 831201      | Health and hygiene (public) **                                                              | 保健衛生(国公立)★★                                              | 1.52E+0                                                                     | 3.94E-1                                               | 8.15E-1                                             | 3.10E-1                                                        | 2.09E+0                                     |
| JD365      | 831202      | Health and hygiene (profit-making)                                                          | 保健衛生(産業)                                                 | 1.89E+0                                                                     | 3.07E-1                                               | 1.21E+0                                             | 3.77E-1                                                        | 2.01E+0                                     |
| JD366      | 831301      | Social insurance (public) **                                                                | 社会保険事業(国公立)★★                                            | 1.49E+0                                                                     | 1.40E-1                                               | 1.11E+0                                             | 2.43E-1                                                        | 1.70E+0                                     |
| JD367      | 831302      | Social insurance (private, non-profit) *                                                    | 社会保険事業(非営利)★                                             | 1.73E+0                                                                     | 1.92E-1                                               | 1.29E+0                                             | 2.47E-1                                                        | 1.54E+0                                     |
| JD368      | 831303      | Social welfare (public) **                                                                  | 社会福祉(国公立)★★                                              | 1.35E+0                                                                     | 2.31E-1                                               | 8.15E-1                                             | 3.04E-1                                                        | 2.21E+0                                     |
| JD369      | 831304      | Social welfare (private, non-profit) *                                                      | 社会福祉(非営利)★                                               | 1.30E+0                                                                     | 1.69E-1                                               | 8.19E-1                                             | 3.16E-1                                                        | 2.34E+0                                     |
| JD370      | 831305      | Social welfare (profit-making)                                                              | 社会福祉(産業)                                                 | 1.46E+0                                                                     | 2.87E-1                                               | 8.44E-1                                             | 3.25E-1                                                        | 2.22E+0                                     |
| JD371      | 831401      | Nursing care (In-home)                                                                      | 介護(居宅)                                                   | 1.19E+0                                                                     | 1.59E-1                                               | 7.54E-1                                             | 2.78E-1                                                        | 2.32E+0                                     |
| JD372      | 831402      | Nursing care (In-facility)                                                                  | 介護(施設)                                                   | 1.42E+0                                                                     | 2.65E-1                                               | 8.34E-1                                             | 3.17E-1                                                        | 2.25E+0                                     |
| JD373      | 841101      | Private non-profit institutions serving enterprises                                         | 対企業民間非営利団体                                               | 1.77E+0                                                                     | 4.12E-1                                               | 9.36E-1                                             | 4.22E-1                                                        | 2.62E+0                                     |
| JD374      | 841102      | Private non-profit institutions serving households, n.e.c. *                                | 対家計民間非営利団体(除別掲)★                                         | 1.18E+0                                                                     | 2.35E-1                                               | 6.86E-1                                             | 2.59E-1                                                        | 2.50E+0                                     |
| JD375      | 851101      | Advertising services                                                                        | 広告                                                       | 1.79E+0                                                                     | 9.84E-2                                               | 1.23E+0                                             | 4.61E-1                                                        | 3.17E+0                                     |
| JD376      | 851201      | Goods rental and leasing (except car rental)                                                | 物品賃貸業(除貸自動車)                                             | 8.50E-1                                                                     | 3.28E-2                                               | 5.27E-1                                             | 2.90E-1                                                        | 3.73E+0                                     |
| JD377      | 851301      | Car rental and leasing                                                                      | 貸自動車業                                                    | 9.99E-1                                                                     | 2.73E-1                                               | 4.72E-1                                             | 2.54E-1                                                        | 3.23E+0                                     |
| JD378      | 851410      | Repair of motor vehicles                                                                    | 自動車修理                                                    | 2.52E+0                                                                     | 5.72E-2                                               | 1.68E+0                                             | 7.88E-1                                                        | 3.02E+0                                     |
| JD379      | 851510      | Repair of machine                                                                           | 機械修理                                                     | 3.00E+0                                                                     | 3.80E-2                                               | 1.84E+0                                             | 1.12E+0                                                        | 3.58E+0                                     |
| JD380      | 851901      | Building maintenance services                                                               | 建物サービス                                                   | 7.94E-1                                                                     | 1.05E-1                                               | 4.92E-1                                             | 1.96E-1                                                        | 2.97E+0                                     |
| JD381      | 851902      | Judicial, financial and accounting services                                                 | 法務・財務・会計サービス                                             | 6.15E-1                                                                     | 1.44E-1                                               | 3.45E-1                                             | 1.26E-1                                                        | 2.54E+0                                     |
| JD382      | 851903      | Civil engineering and construction services                                                 | 土木建築サービス                                                 | 1.25E+0                                                                     | 2.31E-1                                               | 7.56E-1                                             | 2.67E-1                                                        | 2.26E+0                                     |
| JD383      | 851904      | Worker dispatching services                                                                 | 労働者派遣サービス                                                | 1.42E-1                                                                     | 1.63E-2                                               | 9.46E-2                                             | 3.13E-2                                                        | 2.54E+0                                     |
| JD384      | 851909      | Other business services                                                                     | その他の対事業所サービス                                             | 6.63E-1                                                                     | 3.80E-2                                               | 4.69E-1                                             | 1.56E-1                                                        | 2.78E+0                                     |
| JD385      | 861101      | Movie theaters                                                                              | 映画館                                                      | 3.11E+0                                                                     | 5.02E-1                                               | 1.83E+0                                             | 7.80E-1                                                        | 4.93E+0                                     |
| JD386      | 861102      | Performances (except otherwise classified), theatrical companies                            | 興行場(除別掲)・興行団                                             | 1.28E+0                                                                     | 6.50E-2                                               | 8.60E-1                                             | 3.53E-1                                                        | 3.80E+0                                     |
| JD387      | 861103      | Amusement and recreation facilities                                                         | 遊戯場                                                      | 2.65E+0                                                                     | 5.75E-1                                               | 1.67E+0                                             | 4.09E-1                                                        | 1.74E+0                                     |
| JD388      | 861104      | Stadiums and companies of bicycle, horse, motorcar and motorboat races                      | 競輪・競馬等の競走場・競技団                                           | 1.43E+0                                                                     | 2.10E-1                                               | 9.45E-1                                             | 2.72E-1                                                        | 2.17E+0                                     |
| JD389      | 861105      | Sport facility service, public gardens and amusement parks                                  | スポーツ施設提供業・公園・遊園地                                         | 1.66E+0                                                                     | 2.95E-1                                               | 1.03E+0                                             | 3.39E-1                                                        | 2.26E+0                                     |
| JD390      | 861109      | Other amusement and recreation services                                                     | その他の娯楽                                                   | 1.80E+0                                                                     | 2.55E-1                                               | 1.25E+0                                             | 2.90E-1                                                        | 2.16E+0                                     |
| JD391      | 861201      | General eating and drinking places (except coffee shops)                                    | 一般飲食店(除喫茶店)                                              | 2.56E+0                                                                     | 3.29E-1                                               | 1.40E+0                                             | 8.30E-1                                                        | 3.19E+0                                     |
| JD392      | 861202      | Coffee shops                                                                                | 喫茶店                                                      | 2.63E+0                                                                     | 4.80E-1                                               | 1.41E+0                                             | 7.41E-1                                                        | 2.71E+0                                     |
| JD393      | 861203      | Eating and drinking places for pleasures                                                    | 遊興飲食店                                                    | 2.02E+0                                                                     | 3.40E-1                                               | 1.09E+0                                             | 5.89E-1                                                        | 2.88E+0                                     |
| JD394      | 861301      | Hotels                                                                                      | 宿泊業                                                      | 2.79E+0                                                                     | 4.15E-1                                               | 1.69E+0                                             | 6.88E-1                                                        | 2.61E+0                                     |
| JD395      | 861401      | Cleaning                                                                                    | 洗濯業                                                      | 2.19E+0                                                                     | 7.58E-1                                               | 1.13E+0                                             | 3.03E-1                                                        | 1.74E+0                                     |
| JD396      | 861402      | Barber shops                                                                                | 理容業                                                      | 1.34E+0                                                                     | 5.92E-1                                               | 4.96E-1                                             | 2.49E-1                                                        | 2.09E+0                                     |
| JD397      | 861403      | Beauty shops                                                                                | 美容業                                                      | 1.15E+0                                                                     | 3.30E-1                                               | 5.66E-1                                             | 2.59E-1                                                        | 2.35E+0                                     |
| JD398      | 861404      | Public baths                                                                                | 浴場業                                                      | 4.84E+0                                                                     | 2.54E+0                                               | 1.81E+0                                             | 4.91E-1                                                        | 1.43E+0                                     |
| JD399      | 861409      | Other cleaning, barber shops, beauty shops and public baths                                 | その他の洗濯・理容・美容・浴場業                                         | 1.72E+0                                                                     | 4.92E-1                                               | 8.48E-1                                             | 3.75E-1                                                        | 2.38E+0                                     |
| JD400      | 861901      | Photographic studios                                                                        | 写真業                                                      | 1.38E+0                                                                     | 8.33E-2                                               | 9.20E-1                                             | 3.74E-1                                                        | 2.88E+0                                     |
| JD401      | 861902      | Ceremonial occasions                                                                        | 冠婚葬祭業                                                    | 2.60E+0                                                                     | 6.21E-1                                               | 1.54E+0                                             | 4.43E-1                                                        | 2.00E+0                                     |
| JD402      | 861903      | Miscellaneous repairs, n.e.c.                                                               | 各種修理業(除別掲)                                               | 2.04E+0                                                                     | 3.38E-1                                               | 1.29E+0                                             | 4.16E-1                                                        | 2.24E+0                                     |
| JD403      | 861904      | Supplementary tutorial schools, instruction services for arts, culture and technical skills | 個人教授業                                                    | 1.20E+0                                                                     | 1.29E-1                                               | 8.66E-1                                             | 2.01E-1                                                        | 1.95E+0                                     |
| JD404      | 861909      | Other personal services                                                                     | その他の対個人サービス                                              | 1.21E+0                                                                     | 2.28E-1                                               | 7.20E-1                                             | 2.66E-1                                                        | 2.52E+0                                     |
| JD405      | 890000      | Office supplies                                                                             | 事務用品                                                     | 5.27E+0                                                                     | 0.00E+0                                               | 3.52E+0                                             | 1.75E+0                                                        | 3.49E+0                                     |
| JD406      | 900000      | Activities not elsewhere classified                                                         | 分類不明                                                     | 3.13E+0                                                                     | 5.36E-1                                               | 1.97E+0                                             | 6.30E-1                                                        | 2.27E+0                                     |





Table A4: Embodied global CH<sub>4</sub> intensities of Japanese goods and services based on producer price in 2005 [3/5]

| Sector no. | Sector code | Sector name<br>[Japanese domestic commodity]               | Sector name in Japanese<br>[Japanese domestic commodity] | Embodied global CH <sub>4</sub> intensities based on producer price in 2005 |                                                       |                                                     |                                                                |                                             |
|------------|-------------|------------------------------------------------------------|----------------------------------------------------------|-----------------------------------------------------------------------------|-------------------------------------------------------|-----------------------------------------------------|----------------------------------------------------------------|---------------------------------------------|
|            |             |                                                            |                                                          | Total                                                                       | (D) Direct emissions<br>in Japan during<br>production | (S) Induced<br>emissions in Japan<br>through supply | (F) Induced emissions<br>in foreign country's<br>supply chains | Coefficient of variance<br>of the intensity |
|            |             |                                                            |                                                          | tCO <sub>2</sub> eq/M-JPY                                                   | tCO <sub>2</sub> eq/M-JPY                             | tCO <sub>2</sub> eq/M-JPY                           | tCO <sub>2</sub> eq/M-JPY                                      | %                                           |
| JD184      | 272203      | Non-ferrous metal castings and forgings                    | 非鉄金属素形材                                                  | 1.63E-1                                                                     | 9.40E-4                                               | 5.99E-3                                             | 1.56E-1                                                        | 7.62E+0                                     |
| JD185      | 272204      | Nuclear fuels                                              | 核燃料                                                      | 9.08E-2                                                                     | 2.45E-4                                               | 1.32E-3                                             | 8.93E-2                                                        | 5.97E+0                                     |
| JD186      | 272209      | Other non-ferrous metal products                           | その他の非鉄金属製品                                               | 2.28E-1                                                                     | 5.58E-4                                               | 2.83E-3                                             | 2.25E-1                                                        | 6.60E+0                                     |
| JD187      | 281101      | Metal products for construction                            | 建設用金属製品                                                  | 1.49E-1                                                                     | 2.91E-4                                               | 1.23E-2                                             | 1.37E-1                                                        | 7.93E+0                                     |
| JD188      | 281201      | Metal products for architecture                            | 建築用金属製品                                                  | 1.25E-1                                                                     | 4.66E-4                                               | 6.58E-3                                             | 1.18E-1                                                        | 7.53E+0                                     |
| JD189      | 289101      | Gas and oil appliances and heating and cooking apparatus   | ガス・石油機器及び暖房機器                                            | 1.19E-1                                                                     | 3.83E-4                                               | 8.67E-3                                             | 1.09E-1                                                        | 7.53E+0                                     |
| JD190      | 289901      | Bolts, nuts, rivets and springs                            | ボルト・ナット・リベット及びスプリング                                      | 1.11E-1                                                                     | 5.31E-4                                               | 8.98E-3                                             | 1.02E-1                                                        | 7.79E+0                                     |
| JD191      | 289902      | Metal containers, fabricated plate and sheet metal         | 金属製容器及び製缶板金製品                                            | 1.11E-1                                                                     | 7.82E-4                                               | 8.85E-3                                             | 1.01E-1                                                        | 7.54E+0                                     |
| JD192      | 289903      | Plumber's supplies, powder metallurgy products and tools   | 配管工事付属品・粉末冶金製品・道具類                                       | 8.95E-2                                                                     | 5.50E-4                                               | 5.47E-3                                             | 8.35E-2                                                        | 7.15E+0                                     |
| JD193      | 289909      | Other metal products                                       | その他の金属製品                                                 | 9.55E-2                                                                     | 5.69E-4                                               | 6.50E-3                                             | 8.84E-2                                                        | 7.45E+0                                     |
| JD194      | 301101      | Boilers                                                    | ボイラ                                                      | 5.63E-2                                                                     | 2.77E-4                                               | 5.05E-3                                             | 5.10E-2                                                        | 7.46E+0                                     |
| JD195      | 301102      | Turbines                                                   | タービン                                                     | 7.84E-2                                                                     | 3.25E-4                                               | 7.47E-3                                             | 7.06E-2                                                        | 8.47E+0                                     |
| JD196      | 301103      | Engines                                                    | 原動機                                                      | 8.60E-2                                                                     | 2.56E-4                                               | 6.47E-3                                             | 7.93E-2                                                        | 7.53E+0                                     |
| JD197      | 301201      | Conveyors                                                  | 運搬機械                                                     | 7.36E-2                                                                     | 1.10E-4                                               | 7.68E-3                                             | 6.58E-2                                                        | 8.14E+0                                     |
| JD198      | 301301      | Refrigerators and air conditioning apparatus               | 冷凍機・温湿調整装置                                               | 6.27E-2                                                                     | 1.72E-4                                               | 6.01E-3                                             | 5.65E-2                                                        | 7.74E+0                                     |
| JD199      | 301901      | Pumps and compressors                                      | ポンプ及び圧縮機                                                 | 8.55E-2                                                                     | 1.48E-4                                               | 1.02E-2                                             | 7.51E-2                                                        | 7.33E+0                                     |
| JD200      | 301902      | Machinists' precision tools                                | 機械工具                                                     | 7.32E-2                                                                     | 1.86E-4                                               | 5.94E-3                                             | 6.70E-2                                                        | 7.77E+0                                     |
| JD201      | 301909      | Other general industrial machinery and equipment           | その他の一般産業機械及び装置                                           | 7.87E-2                                                                     | 2.46E-4                                               | 6.87E-3                                             | 7.15E-2                                                        | 7.64E+0                                     |
| JD202      | 302101      | Machinery and equipment for construction and mining        | 建設・鉱山機械                                                  | 8.56E-2                                                                     | 2.10E-4                                               | 9.13E-3                                             | 7.63E-2                                                        | 7.83E+0                                     |
| JD203      | 302201      | Chemical machinery                                         | 化学機械                                                     | 6.58E-2                                                                     | 1.03E-4                                               | 6.00E-3                                             | 5.97E-2                                                        | 7.65E+0                                     |
| JD204      | 302301      | Industrial robots                                          | 産業用ロボット                                                  | 6.84E-2                                                                     | 1.04E-4                                               | 6.43E-3                                             | 6.18E-2                                                        | 7.71E+0                                     |
| JD205      | 302401      | Metal machine tools                                        | 金属工作機械                                                   | 6.72E-2                                                                     | 2.78E-5                                               | 8.42E-3                                             | 5.87E-2                                                        | 7.31E+0                                     |
| JD206      | 302402      | Metal processing machinery                                 | 金属加工機械                                                   | 8.22E-2                                                                     | 6.63E-5                                               | 1.14E-2                                             | 7.07E-2                                                        | 7.19E+0                                     |
| JD207      | 302901      | Machinery for agricultural use                             | 農業用機械                                                    | 8.05E-2                                                                     | 3.11E-4                                               | 7.72E-3                                             | 7.25E-2                                                        | 7.51E+0                                     |
| JD208      | 302902      | Textile machinery                                          | 繊維機械                                                     | 6.94E-2                                                                     | 2.05E-4                                               | 5.43E-3                                             | 6.38E-2                                                        | 7.82E+0                                     |
| JD209      | 302903      | Food processing machinery and equipment                    | 食品機械・同装置                                                 | 8.72E-2                                                                     | 1.13E-4                                               | 7.11E-3                                             | 7.99E-2                                                        | 8.13E+0                                     |
| JD210      | 302904      | Semiconductor making equipment                             | 半導体製造装置                                                  | 6.67E-2                                                                     | 8.31E-5                                               | 5.78E-3                                             | 6.08E-2                                                        | 8.70E+0                                     |
| JD211      | 302905      | Vacuum equipment and vacuum component                      | 真空装置・真空機器                                                | 7.70E-2                                                                     | 1.84E-4                                               | 8.09E-3                                             | 6.88E-2                                                        | 7.32E+0                                     |
| JD212      | 302909      | Other special machinery for industrial use                 | その他の特殊産業用機械                                              | 6.84E-2                                                                     | 1.47E-4                                               | 6.75E-3                                             | 6.15E-2                                                        | 8.13E+0                                     |
| JD213      | 303101      | Metal molds                                                | 金型                                                       | 7.61E-2                                                                     | 1.77E-4                                               | 8.09E-3                                             | 6.79E-2                                                        | 7.29E+0                                     |
| JD214      | 303102      | Bearings                                                   | ベアリング                                                    | 1.21E-1                                                                     | 3.44E-4                                               | 1.00E-2                                             | 1.10E-1                                                        | 7.84E+0                                     |
| JD215      | 303109      | Other general machines and parts                           | その他の一般機械器具及び部品                                           | 8.20E-2                                                                     | 2.73E-4                                               | 6.20E-3                                             | 7.56E-2                                                        | 7.69E+0                                     |
| JD216      | 311101      | Copy machine                                               | 複写機                                                      | 6.68E-2                                                                     | 1.24E-4                                               | 5.33E-3                                             | 6.13E-2                                                        | 9.24E+0                                     |
| JD217      | 311109      | Other office machines                                      | その他の事務用機械                                                | 5.63E-2                                                                     | 8.21E-5                                               | 4.46E-3                                             | 5.18E-2                                                        | 9.03E+0                                     |
| JD218      | 311201      | Machinery for service industry                             | サービス用機器                                                  | 6.75E-2                                                                     | 1.12E-4                                               | 7.43E-3                                             | 6.00E-2                                                        | 7.87E+0                                     |
| JD219      | 321101      | Rotating electrical equipment                              | 回転電気機械                                                   | 8.38E-2                                                                     | 2.93E-4                                               | 6.02E-3                                             | 7.75E-2                                                        | 7.86E+0                                     |
| JD220      | 321102      | Transformers and reactors                                  | 変圧器・変成器                                                  | 7.52E-2                                                                     | 3.23E-5                                               | 6.00E-3                                             | 6.92E-2                                                        | 7.93E+0                                     |
| JD221      | 321103      | Relay switches and switchboards                            | 開閉制御装置及び配電盤                                              | 6.75E-2                                                                     | 1.37E-4                                               | 5.71E-3                                             | 6.17E-2                                                        | 7.98E+0                                     |
| JD222      | 321104      | Wiring devices and supplies                                | 配線器具                                                     | 6.36E-2                                                                     | 2.07E-4                                               | 5.15E-3                                             | 5.82E-2                                                        | 8.89E+0                                     |
| JD223      | 321105      | Electrical equipment for internal combustion engines       | 内燃機関電装品                                                  | 7.44E-2                                                                     | 1.32E-4                                               | 6.20E-3                                             | 6.80E-2                                                        | 7.64E+0                                     |
| JD224      | 321109      | Other electrical devices and parts                         | その他の産業用電気機器                                              | 7.70E-2                                                                     | 1.65E-4                                               | 7.40E-3                                             | 6.94E-2                                                        | 7.64E+0                                     |
| JD225      | 322101      | Applied electronic equipment                               | 電子応用装置                                                   | 4.80E-2                                                                     | 1.43E-5                                               | 3.79E-3                                             | 4.42E-2                                                        | 1.11E+1                                     |
| JD226      | 323101      | Electric measuring instruments                             | 電気計測器                                                    | 4.54E-2                                                                     | 6.47E-5                                               | 3.24E-3                                             | 4.21E-2                                                        | 1.03E+1                                     |
| JD227      | 324101      | Electric bulbs                                             | 電球類                                                      | 5.95E-2                                                                     | 6.41E-4                                               | 5.25E-3                                             | 5.36E-2                                                        | 8.80E+0                                     |
| JD228      | 324102      | Electric lighting fixtures and apparatus                   | 電気照明器具                                                   | 6.89E-2                                                                     | 3.06E-4                                               | 5.27E-3                                             | 6.34E-2                                                        | 9.10E+0                                     |
| JD229      | 324103      | Batteries                                                  | 電池                                                       | 1.16E-1                                                                     | 3.90E-4                                               | 6.72E-3                                             | 1.09E-1                                                        | 8.10E+0                                     |
| JD230      | 324109      | Other electrical devices and parts                         | その他の電気機械器具                                               | 1.12E-1                                                                     | 7.80E-4                                               | 4.76E-3                                             | 1.07E-1                                                        | 6.96E+0                                     |
| JD231      | 325101      | Household air-conditioners                                 | 民生用エアコンディショナ                                             | 7.00E-2                                                                     | 1.30E-4                                               | 5.27E-3                                             | 6.46E-2                                                        | 8.43E+0                                     |
| JD232      | 325102      | Household electric appliances (except air-conditioners)    | 民生用電気機器(除エアコン)                                           | 6.95E-2                                                                     | 5.41E-5                                               | 5.31E-3                                             | 6.41E-2                                                        | 8.09E+0                                     |
| JD233      | 331101      | Video recording and playback equipment                     | ビデオ機器                                                    | 6.32E-2                                                                     | 1.14E-5                                               | 4.44E-3                                             | 5.87E-2                                                        | 8.98E+0                                     |
| JD234      | 331102      | Electric audio equipment                                   | 電気音響機器                                                   | 5.76E-2                                                                     | 1.15E-4                                               | 4.28E-3                                             | 5.32E-2                                                        | 9.17E+0                                     |
| JD235      | 331103      | Radio and television sets                                  | ラジオ・テレビ受信機                                               | 5.83E-2                                                                     | 5.04E-5                                               | 4.82E-3                                             | 5.34E-2                                                        | 9.12E+0                                     |
| JD236      | 332101      | Wired communication equipment                              | 有線電気通信機器                                                 | 5.60E-2                                                                     | 1.09E-4                                               | 4.10E-3                                             | 5.18E-2                                                        | 9.25E+0                                     |
| JD237      | 332102      | Cellular phones                                            | 携帯電話機                                                    | 5.47E-2                                                                     | 1.18E-4                                               | 4.18E-3                                             | 5.04E-2                                                        | 9.77E+0                                     |
| JD238      | 332103      | Radio communication equipment (except cellular phones)     | 無線電気通信機器(除携帯電話機)                                         | 5.22E-2                                                                     | 1.29E-4                                               | 3.79E-3                                             | 4.83E-2                                                        | 9.84E+0                                     |
| JD239      | 332109      | Other communication equipment                              | その他の電気通信機器                                               | 5.38E-2                                                                     | 1.88E-4                                               | 8.40E-3                                             | 4.53E-2                                                        | 8.23E+0                                     |
| JD240      | 333101      | Personal Computers                                         | パーソナルコンピュータ                                              | 5.04E-2                                                                     | 1.77E-5                                               | 3.61E-3                                             | 4.68E-2                                                        | 1.10E+1                                     |
| JD241      | 333102      | Electronic computing equipment (except personal computers) | 電子計算機本体(除パソコン)                                           | 4.21E-2                                                                     | 1.96E-5                                               | 2.90E-3                                             | 3.92E-2                                                        | 1.14E+1                                     |
| JD242      | 333103      | Electronic computing equipment (accessory equipment)       | 電子計算機付属装置                                                | 5.01E-2                                                                     | 1.43E-5                                               | 3.84E-3                                             | 4.62E-2                                                        | 9.99E+0                                     |
| JD243      | 341101      | Semiconductor devices                                      | 半導体素子                                                    | 6.11E-2                                                                     | 3.64E-4                                               | 4.23E-3                                             | 5.65E-2                                                        | 7.77E+0                                     |
| JD244      | 341102      | Integrated circuits                                        | 集積回路                                                     | 7.34E-2                                                                     | 2.28E-4                                               | 5.13E-3                                             | 6.80E-2                                                        | 8.32E+0                                     |
| JD245      | 342101      | Electron tubes                                             | 電子管                                                      | 7.75E-2                                                                     | 3.78E-4                                               | 8.37E-3                                             | 6.87E-2                                                        | 9.46E+0                                     |
| JD246      | 342102      | Liquid crystal element                                     | 液晶素子                                                     | 6.20E-2                                                                     | 1.54E-4                                               | 5.38E-3                                             | 5.64E-2                                                        | 9.90E+0                                     |
| JD247      | 342103      | Magnetic tapes and discs                                   | 磁気テープ・磁気ディスク                                             | 1.21E-1                                                                     | 2.06E-3                                               | 7.79E-3                                             | 1.11E-1                                                        | 7.75E+0                                     |
| JD248      | 342109      | Other electronic components                                | その他の電子部品                                                 | 7.03E-2                                                                     | 2.24E-4                                               | 6.24E-3                                             | 6.38E-2                                                        | 8.17E+0                                     |
| JD249      | 351101      | Passenger motor cars                                       | 乗用車                                                      | 8.23E-2                                                                     | 5.70E-5                                               | 7.20E-3                                             | 7.51E-2                                                        | 7.95E+0                                     |
| JD250      | 352101      | Trucks, buses and other cars                               | トラック・バス・その他の自動車                                          | 8.52E-2                                                                     | 1.26E-4                                               | 7.14E-3                                             | 7.79E-2                                                        | 8.20E+0                                     |
| JD251      | 353101      | Two-wheel motor vehicles                                   | 二輪自動車                                                    | 7.54E-2                                                                     | 6.64E-5                                               | 6.15E-3                                             | 6.92E-2                                                        | 8.53E+0                                     |
| JD252      | 354101      | Motor vehicle bodies                                       | 自動車車体                                                    | 1.02E-1                                                                     | 1.96E-4                                               | 8.60E-3                                             | 9.34E-2                                                        | 7.73E+0                                     |
| JD253      | 354102      | Internal combustion engines for motor vehicles and parts   | 自動車用内燃機関・同部分品                                            | 8.98E-2                                                                     | 2.38E-4                                               | 6.27E-3                                             | 8.33E-2                                                        | 7.48E+0                                     |
| JD254      | 354103      | Motor vehicle parts and accessories                        | 自動車部品                                                    | 8.57E-2                                                                     | 1.47E-4                                               | 6.54E-3                                             | 7.90E-2                                                        | 7.82E+0                                     |
| JD255      | 361101      | Steel ships                                                | 鋼船                                                       | 1.39E-1                                                                     | 1.87E-4                                               | 1.18E-2                                             | 1.27E-1                                                        | 7.80E+0                                     |
| JD256      | 361102      | Ships (except steel ships)                                 | その他の船舶                                                   | 7.73E-2                                                                     | 1.44E-4                                               | 6.52E-3                                             | 7.06E-2                                                        | 7.29E+0                                     |
| JD257      | 361103      | Internal combustion engines for vessels                    | 船用内燃機関                                                   | 1.04E-1                                                                     | 1.86E-3                                               | 8.02E-3                                             | 9.39E-2                                                        | 7.10E+0                                     |
| JD258      | 361110      | Repair of ships                                            | 船舶修理                                                     | 8.16E-2                                                                     | 7.58E-5                                               | 7.96E-3                                             | 7.35E-2                                                        | 7.51E+0                                     |
| JD259      | 362101      | Rolling stock                                              | 鉄道車両                                                     | 1.10E-1                                                                     | 2.83E-4                                               | 1.84E-2                                             | 9.09E-2                                                        | 6.73E+0                                     |
| JD260      | 362110      | Repair of rolling stock                                    | 鉄道車両修理                                                   | 1.54E-1                                                                     | 2.36E-3                                               | 1.96E-2                                             | 1.32E-1                                                        | 6.78E+0                                     |
| JD261      | 362201      | Aircrafts                                                  | 航空機                                                      | 6.34E-2                                                                     | 8.80E-4                                               | 3.16E-3                                             | 5.94E-2                                                        | 1.38E+1                                     |
| JD262      | 362210      | Repair of aircrafts                                        | 航空機修理                                                    | 7.01E-2                                                                     | 3.86E-4                                               | 1.48E-3                                             | 6.83E-2                                                        | 3.24E+1                                     |
| JD263      | 362901      | Bicycles                                                   | 自転車                                                      | 8.73E-2                                                                     | 2.15E-3                                               | 5.75E-3                                             | 7.94E-2                                                        | 7.31E+0                                     |
| JD264      | 362909      | Other transport equipment                                  | その他の輸送機械                                                 | 8.72E-2                                                                     | 4.79E-4                                               | 7.53E-3                                             | 7.92E-2                                                        | 7.62E+0                                     |
| JD265      | 371101      | Camera                                                     | カメラ                                                      | 5.31E-2                                                                     | 1.75E-4                                               | 4.20E-3                                             | 4.87E-2                                                        | 8.78E+0                                     |
| JD266      | 371109      | Other photographic and optical instruments                 | その他の光学機械                                                 | 6.44E-2                                                                     | 2.44E-4                                               | 5.50E-3                                             | 5.86E-2                                                        | 8.20E+0                                     |

Table A4: Embodied global CH<sub>4</sub> intensities of Japanese goods and services based on producer price in 2005 [4/5]

| Sector no. | Sector code | Sector name<br>[Japanese domestic commodity]                   | Sector name in Japanese<br>[Japanese domestic commodity] | Embodied global CH <sub>4</sub> intensities based on producer price in 2005 |                                                       |                                                     |                                                                |                                             |
|------------|-------------|----------------------------------------------------------------|----------------------------------------------------------|-----------------------------------------------------------------------------|-------------------------------------------------------|-----------------------------------------------------|----------------------------------------------------------------|---------------------------------------------|
|            |             |                                                                |                                                          | Total                                                                       | (D) Direct emissions<br>in Japan during<br>production | (S) Induced<br>emissions in Japan<br>through supply | (F) Induced emissions<br>in foreign country's<br>supply chains | Coefficient of variance<br>of the intensity |
|            |             |                                                                |                                                          | tCO <sub>2</sub> eq/M-JPY                                                   | tCO <sub>2</sub> eq/M-JPY                             | tCO <sub>2</sub> eq/M-JPY                           | tCO <sub>2</sub> eq/M-JPY                                      | %                                           |
| JD267      | 371201      | Watches and clocks                                             | 時計                                                       | 5.56E-2                                                                     | 2.62E-4                                               | 4.32E-3                                             | 5.10E-2                                                        | 8.66E+0                                     |
| JD268      | 371901      | Professional and scientific instruments                        | 理化学機械器具                                                  | 5.83E-2                                                                     | 2.83E-4                                               | 7.31E-3                                             | 5.07E-2                                                        | 7.44E+0                                     |
| JD269      | 371902      | Analytical instruments, testing machine, measuring instruments | 分析器・試験機・計量器・測定器                                          | 5.24E-2                                                                     | 1.39E-4                                               | 4.64E-3                                             | 4.76E-2                                                        | 7.94E+0                                     |
| JD270      | 371903      | Medical instruments                                            | 医療用機械器具                                                  | 6.57E-2                                                                     | 3.07E-4                                               | 5.06E-3                                             | 6.03E-2                                                        | 7.83E+0                                     |
| JD271      | 391101      | Toys and games                                                 | がん具                                                      | 6.10E-2                                                                     | 2.92E-4                                               | 4.63E-3                                             | 5.61E-2                                                        | 8.31E+0                                     |
| JD272      | 391102      | Sporting and athletic goods                                    | 運動用品                                                     | 1.20E-1                                                                     | 2.82E-4                                               | 8.92E-3                                             | 1.11E-1                                                        | 8.99E+0                                     |
| JD273      | 391901      | Musical instruments                                            | 楽器                                                       | 6.30E-2                                                                     | 9.42E-5                                               | 4.83E-3                                             | 5.81E-2                                                        | 7.39E+0                                     |
| JD274      | 391902      | Audio and video records, other information recording media     | 情報記録物                                                    | 6.57E-2                                                                     | 7.91E-5                                               | 4.61E-3                                             | 6.10E-2                                                        | 8.60E+0                                     |
| JD275      | 391903      | Stationery                                                     | 筆記具・文具                                                   | 8.20E-2                                                                     | 1.58E-4                                               | 6.62E-3                                             | 7.52E-2                                                        | 8.32E+0                                     |
| JD276      | 391904      | Jewelry and adornments                                         | 身辺細貨品                                                    | 9.76E-2                                                                     | 1.28E-4                                               | 4.88E-3                                             | 9.26E-2                                                        | 1.67E+1                                     |
| JD277      | 391905      | "Tatami" (straw matting) and straw products                    | 畳・わら加工品                                                  | 8.14E-1                                                                     | 8.52E-5                                               | 3.63E-1                                             | 4.50E-1                                                        | 6.04E+0                                     |
| JD278      | 391906      | Ordnance                                                       | 武器                                                       | 8.93E-2                                                                     | 9.16E-5                                               | 1.16E-2                                             | 7.76E-2                                                        | 8.10E+0                                     |
| JD279      | 391909      | Miscellaneous manufacturing products                           | その他の製造工業製品                                               | 7.31E-2                                                                     | 9.05E-5                                               | 6.45E-3                                             | 6.65E-2                                                        | 8.02E+0                                     |
| JD280      | 392101      | Reuse and recycling                                            | 再生资源回収・加工処理                                              | 6.87E-2                                                                     | 7.75E-4                                               | 5.52E-3                                             | 6.24E-2                                                        | 7.75E+0                                     |
| JD281      | 411101      | Residential construction (wooden)                              | 住宅建築(木造)                                                 | 6.54E-2                                                                     | 2.20E-4                                               | 5.03E-3                                             | 6.01E-2                                                        | 7.23E+0                                     |
| JD282      | 411102      | Residential construction (non-wooden)                          | 住宅建築(非木造)                                                | 7.16E-2                                                                     | 5.10E-4                                               | 6.30E-3                                             | 6.48E-2                                                        | 7.20E+0                                     |
| JD283      | 411201      | Non-residential construction (wooden)                          | 非住宅建築(木造)                                                | 6.32E-2                                                                     | 2.52E-4                                               | 5.65E-3                                             | 5.73E-2                                                        | 7.26E+0                                     |
| JD284      | 411202      | Non-residential construction (non-wooden)                      | 非住宅建築(非木造)                                               | 7.02E-2                                                                     | 5.26E-4                                               | 5.91E-3                                             | 6.38E-2                                                        | 7.37E+0                                     |
| JD285      | 412101      | Repair of construction                                         | 建設補修                                                     | 7.02E-2                                                                     | 7.23E-4                                               | 7.94E-3                                             | 6.16E-2                                                        | 6.79E+0                                     |
| JD286      | 413101      | Public construction of roads                                   | 道路関係公共事業                                                 | 8.91E-2                                                                     | 1.79E-3                                               | 1.04E-2                                             | 7.70E-2                                                        | 7.07E+0                                     |
| JD287      | 413102      | Public construction of rivers, drainages and others            | 河川・下水道・その他の公共事業                                          | 7.57E-2                                                                     | 1.31E-3                                               | 1.03E-2                                             | 6.41E-2                                                        | 7.02E+0                                     |
| JD288      | 413103      | Agricultural public construction                               | 農林関係公共事業                                                 | 9.70E-2                                                                     | 2.06E-3                                               | 1.46E-2                                             | 8.04E-2                                                        | 6.54E+0                                     |
| JD289      | 413201      | Railway construction                                           | 鉄道軌道建設                                                   | 8.94E-2                                                                     | 8.43E-4                                               | 1.25E-2                                             | 7.60E-2                                                        | 6.76E+0                                     |
| JD290      | 413202      | Electric power facilities construction                         | 電力施設建設                                                   | 7.25E-2                                                                     | 6.52E-4                                               | 1.01E-2                                             | 6.18E-2                                                        | 6.80E+0                                     |
| JD291      | 413203      | Telecommunication facilities construction                      | 電気通信施設建設                                                 | 7.10E-2                                                                     | 1.06E-3                                               | 1.06E-2                                             | 5.93E-2                                                        | 6.80E+0                                     |
| JD292      | 413209      | Other civil engineering and construction                       | その他の土木建設                                                 | 7.95E-2                                                                     | 9.95E-4                                               | 1.10E-2                                             | 6.75E-2                                                        | 6.68E+0                                     |
| JD293      | 5111001     | Electricity                                                    | 事業用電力                                                    | 5.79E-1                                                                     | 2.72E-3                                               | 1.22E-2                                             | 5.64E-1                                                        | 8.36E+0                                     |
| JD294      | 511104      | On-site power generation                                       | 自家発電                                                     | 8.22E-1                                                                     | 3.66E-2                                               | 2.77E-2                                             | 7.58E-1                                                        | 7.85E+0                                     |
| JD295      | 512101      | Gas supply                                                     | 都市ガス                                                     | 6.75E-1                                                                     | 6.44E-3                                               | 8.11E-3                                             | 6.60E-1                                                        | 9.26E+0                                     |
| JD296      | 512201      | Steam and hot water supply                                     | 熱供給業                                                     | 2.43E-1                                                                     | 1.09E-3                                               | 1.04E-2                                             | 2.31E-1                                                        | 7.77E+0                                     |
| JD297      | 521101      | Water supply                                                   | 上水道・簡易水道                                                 | 3.38E-2                                                                     | 5.20E-5                                               | 4.60E-3                                             | 2.91E-2                                                        | 7.79E+0                                     |
| JD298      | 521102      | Industrial water supply                                        | 工業用水                                                     | 3.31E-2                                                                     | 4.22E-5                                               | 1.53E-3                                             | 3.16E-2                                                        | 7.61E+0                                     |
| JD299      | 521103      | Sewage disposal **                                             | 下水道★★                                                    | 1.22E+0                                                                     | 1.05E+0                                               | 6.18E-3                                             | 1.60E-1                                                        | 1.05E+0                                     |
| JD300      | 521201      | Waste management services (public) **                          | 廃棄物処理(公営)★★                                              | 2.37E+0                                                                     | 2.28E+0                                               | 8.63E-3                                             | 7.43E-2                                                        | 2.43E-1                                     |
| JD301      | 521202      | Waste management services (private)                            | 廃棄物処理(産業)                                                | 1.02E+0                                                                     | 9.73E-1                                               | 7.31E-3                                             | 4.43E-2                                                        | 3.42E-1                                     |
| JD302      | 611101      | Wholesale trade                                                | 卸売                                                       | 2.85E-2                                                                     | 5.20E-5                                               | 3.60E-3                                             | 2.48E-2                                                        | 8.30E+0                                     |
| JD303      | 611201      | Retail trade                                                   | 小売                                                       | 5.38E-2                                                                     | 2.21E-4                                               | 7.78E-3                                             | 4.58E-2                                                        | 6.83E+0                                     |
| JD304      | 621101      | Financial service                                              | 金融                                                       | 1.77E-2                                                                     | 1.22E-5                                               | 2.85E-3                                             | 1.49E-2                                                        | 1.41E+1                                     |
| JD305      | 621201      | Life insurance                                                 | 生命保険                                                     | 2.36E-2                                                                     | 2.50E-5                                               | 5.64E-3                                             | 1.79E-2                                                        | 1.00E+1                                     |
| JD306      | 621202      | Non-life insurance                                             | 損害保険                                                     | 1.78E-2                                                                     | 2.45E-5                                               | 2.95E-3                                             | 1.49E-2                                                        | 1.08E+1                                     |
| JD307      | 641101      | Real estate agencies and managers                              | 不動産仲介・管理業                                                | 2.54E-2                                                                     | 4.41E-5                                               | 2.45E-3                                             | 2.29E-2                                                        | 8.53E+0                                     |
| JD308      | 641102      | Real estate rental service                                     | 不動産賃貸業                                                   | 2.30E-2                                                                     | 9.21E-5                                               | 1.80E-3                                             | 2.11E-2                                                        | 7.64E+0                                     |
| JD309      | 642101      | House rent                                                     | 住宅賃貸料                                                    | 1.19E-2                                                                     | 3.97E-5                                               | 1.32E-3                                             | 1.05E-2                                                        | 8.41E+0                                     |
| JD310      | 642201      | House rent (imputed house rent)                                | 住宅賃貸料(帰属家賃)                                              | 4.97E-3                                                                     | 0.00E+0                                               | 6.43E-4                                             | 4.33E-3                                                        | 7.68E+0                                     |
| JD311      | 711101      | Railway transport (passengers)                                 | 鉄道旅客輸送                                                   | 7.07E-2                                                                     | 1.15E-4                                               | 1.67E-2                                             | 5.39E-2                                                        | 6.28E+0                                     |
| JD312      | 711201      | Railway transport (freight)                                    | 鉄道貨物輸送                                                   | 1.21E-1                                                                     | 5.47E-4                                               | 2.92E-2                                             | 9.13E-2                                                        | 5.87E+0                                     |
| JD313      | 712101      | Bus transport service                                          | バス                                                       | 7.86E-2                                                                     | 1.36E-3                                               | 3.56E-3                                             | 7.37E-2                                                        | 9.15E+0                                     |
| JD314      | 712102      | Hired car and taxi transport                                   | ハイヤー・タクシー                                                | 9.32E-2                                                                     | 1.61E-3                                               | 2.23E-3                                             | 8.94E-2                                                        | 9.02E+0                                     |
| JD315      | 712201      | Road freight transport(except Self-transport by private cars)  | 道路貨物輸送(除自家輸送)                                            | 9.53E-2                                                                     | 1.72E-3                                               | 4.93E-3                                             | 8.86E-2                                                        | 9.15E+0                                     |
| JD316      | 713101      | Self-transport by private cars (passengers)                    | 自家輸送(旅客自動車)                                              | 3.48E-1                                                                     | 7.93E-3                                               | 6.71E-3                                             | 3.33E-1                                                        | 9.88E+0                                     |
| JD317      | 713201      | Self-transport by private cars (freight)                       | 自家輸送(貨物自動車)                                              | 3.05E-1                                                                     | 6.78E-3                                               | 6.42E-3                                             | 2.92E-1                                                        | 9.73E+0                                     |
| JD318      | 714101      | Ocean transport                                                | 外洋輸送                                                     | 3.35E-1                                                                     | 1.45E-2                                               | 2.32E-3                                             | 3.18E-1                                                        | 3.35E+1                                     |
| JD319      | 714201      | Coastal and inland water transport                             | 沿海・内水面輸送                                                 | 1.78E-1                                                                     | 2.45E-2                                               | 7.58E-3                                             | 1.46E-1                                                        | 8.02E+0                                     |
| JD320      | 714301      | Harbor transport service                                       | 港湾運送                                                     | 3.41E-2                                                                     | 1.97E-3                                               | 2.67E-3                                             | 2.94E-2                                                        | 7.53E+0                                     |
| JD321      | 715101      | Air transport                                                  | 航空輸送                                                     | 1.90E-1                                                                     | 6.11E-3                                               | 4.41E-3                                             | 1.80E-1                                                        | 9.15E+0                                     |
| JD322      | 716101      | Consigned freight forwarding                                   | 貨物利用運送                                                   | 3.87E-2                                                                     | 3.18E-4                                               | 4.70E-3                                             | 3.37E-2                                                        | 7.44E+0                                     |
| JD323      | 717101      | Storage facility service                                       | 倉庫                                                       | 5.09E-2                                                                     | 4.16E-5                                               | 5.71E-3                                             | 4.52E-2                                                        | 7.24E+0                                     |
| JD324      | 718101      | Packing service                                                | こん包                                                      | 5.73E-2                                                                     | 4.80E-5                                               | 6.08E-3                                             | 5.12E-2                                                        | 7.20E+0                                     |
| JD325      | 718901      | Facility service for road transport                            | 道路輸送施設提供                                                 | 3.51E-2                                                                     | 4.74E-5                                               | 8.27E-3                                             | 2.68E-2                                                        | 8.25E+0                                     |
| JD326      | 718902      | Port and water traffic control **                              | 水運施設管理★★                                                 | 4.81E-2                                                                     | 3.77E-4                                               | 1.73E-2                                             | 3.04E-2                                                        | 5.15E+0                                     |
| JD327      | 718903      | Services relating to water transport                           | その他の水運付帯サービス                                             | 3.15E-2                                                                     | 8.73E-5                                               | 1.91E-2                                             | 1.24E-2                                                        | 3.45E+0                                     |
| JD328      | 718904      | Airport and air traffic control (public) **                    | 航空施設管理(国営)★★                                             | 5.07E-2                                                                     | 5.76E-5                                               | 8.09E-3                                             | 4.26E-2                                                        | 7.52E+0                                     |
| JD329      | 718905      | Airport and air traffic control                                | 航空施設管理(産業)                                               | 6.04E-2                                                                     | 2.84E-4                                               | 9.68E-3                                             | 5.04E-2                                                        | 7.34E+0                                     |
| JD330      | 718906      | Services relating to air transport                             | その他の航空付帯サービス                                             | 4.96E-2                                                                     | 9.90E-5                                               | 1.41E-2                                             | 3.54E-2                                                        | 7.88E+0                                     |
| JD331      | 718909      | Travel agency and other services relating to transport         | 旅行・その他の運輸付帯サービス                                          | 2.27E-2                                                                     | 3.22E-5                                               | 2.70E-3                                             | 2.00E-2                                                        | 1.20E+1                                     |
| JD332      | 731101      | Postal service*                                                | 郵便・信書便                                                   | 2.80E-2                                                                     | 8.98E-5                                               | 2.34E-3                                             | 2.55E-2                                                        | 7.72E+0                                     |
| JD333      | 731201      | Fixed telecommunication                                        | 固定電気通信                                                   | 3.15E-2                                                                     | 3.41E-5                                               | 6.24E-3                                             | 2.52E-2                                                        | 1.04E+1                                     |
| JD334      | 731202      | Mobile telecommunication                                       | 移動電気通信                                                   | 2.55E-2                                                                     | 3.69E-5                                               | 9.16E-3                                             | 1.63E-2                                                        | 6.33E+0                                     |
| JD335      | 731203      | Other telecommunication                                        | その他の電気通信                                                 | 3.81E-2                                                                     | 3.67E-5                                               | 6.13E-3                                             | 3.19E-2                                                        | 1.13E+1                                     |
| JD336      | 731909      | Other services relating to communication                       | その他の通信サービス                                               | 3.19E-2                                                                     | 8.52E-5                                               | 4.55E-3                                             | 2.72E-2                                                        | 7.74E+0                                     |
| JD337      | 732101      | Public broadcasting                                            | 公共放送                                                     | 6.26E-2                                                                     | 3.32E-5                                               | 2.72E-2                                             | 3.54E-2                                                        | 1.13E+1                                     |
| JD338      | 732102      | Private broadcasting                                           | 民間放送                                                     | 4.20E-2                                                                     | 6.40E-5                                               | 7.57E-3                                             | 3.44E-2                                                        | 1.75E+1                                     |
| JD339      | 732103      | Cable broadcasting                                             | 有線放送                                                     | 2.97E-2                                                                     | 4.93E-5                                               | 3.56E-3                                             | 2.61E-2                                                        | 1.10E+1                                     |
| JD340      | 733101      | Information services                                           | 情報サービス                                                   | 2.41E-2                                                                     | 1.79E-5                                               | 1.93E-3                                             | 2.21E-2                                                        | 1.31E+1                                     |
| JD341      | 734101      | Internet based services                                        | インターネット附随サービス                                            | 3.53E-2                                                                     | 2.40E-5                                               | 5.50E-3                                             | 2.98E-2                                                        | 1.15E+1                                     |
| JD342      | 735101      | Image information production and distribution industry         | 映像情報制作・配給業                                               | 5.90E-2                                                                     | 1.02E-4                                               | 5.31E-3                                             | 5.36E-2                                                        | 1.80E+1                                     |
| JD343      | 735102      | Newspaper                                                      | 新聞                                                       | 6.77E-2                                                                     | 1.31E-5                                               | 5.61E-3                                             | 6.21E-2                                                        | 8.98E+0                                     |
| JD344      | 735103      | Publication                                                    | 出版                                                       | 5.87E-2                                                                     | 1.23E-5                                               | 6.34E-3                                             | 5.24E-2                                                        | 8.02E+0                                     |
| JD345      | 735104      | News syndicates and private detective agencies                 | ニュース供給・興信所                                               | 2.38E-2                                                                     | 5.14E-6                                               | 2.39E-3                                             | 2.14E-2                                                        | 1.08E+1                                     |
| JD346      | 811101      | Public administration (central) **                             | 公務(中央)★★                                                 | 4.87E-2                                                                     | 1.39E-4                                               | 6.30E-3                                             | 4.23E-2                                                        | 9.05E+0                                     |
| JD347      | 811201      | Public administration (local) **                               | 公務(地方)★★                                                 | 5.23E-2                                                                     | 1.92E-4                                               | 2.67E-2                                             | 2.54E-2                                                        | 3.97E+0                                     |
| JD348      | 821101      | School education (public) **                                   | 学校教育(国公立)★★                                              | 1.99E-2                                                                     | 7.29E-5                                               | 6.31E-3                                             | 1.35E-2                                                        | 5.27E+0                                     |
| JD349      | 821102      | School education (private) *                                   | 学校教育(私立)★                                                | 3.46E-2                                                                     | 1.41E-4                                               | 8.56E-3                                             | 2.59E-2                                                        | 6.25E+0                                     |
| JD350      | 821301      | Social education (public) **                                   | 社会教育(国公立)★★                                              | 6.19E-2                                                                     | 1.59E-4                                               | 7.04E-3                                             | 5.47E-2                                                        | 1.06E+1                                     |
| JD351      | 821302      | Social education (private, non-profit) *                       | 社会教育(非営利)★                                               | 8.72E-2                                                                     | 1.21E-4                                               | 6.30E-3                                             | 8.08E-2                                                        | 1.12E+1                                     |
| JD352      | 821303      | Other educational and training institutions (public) **        | その他の教育訓練機関(国公立)★★                                        | 1.13E-1                                                                     | 1.24E-3                                               | 2.70E-2                                             | 8.51E-2                                                        | 6.27E+0                                     |

Table A4: Embodied global CH<sub>4</sub> intensities of Japanese goods and services based on producer price in 2005 [5/5]

| Sector no. | Sector code | Sector name<br>[Japanese domestic commodity]                                                | Sector name in Japanese<br>[Japanese domestic commodity] | Embodied global CH <sub>4</sub> intensities based on producer price in 2005 |                                                       |                                                     |                                                                |                                             |
|------------|-------------|---------------------------------------------------------------------------------------------|----------------------------------------------------------|-----------------------------------------------------------------------------|-------------------------------------------------------|-----------------------------------------------------|----------------------------------------------------------------|---------------------------------------------|
|            |             |                                                                                             |                                                          | Total                                                                       | (D) Direct emissions<br>in Japan during<br>production | (S) Induced<br>emissions in Japan<br>through supply | (F) Induced emissions<br>in foreign country's<br>supply chains | Coefficient of variance<br>of the intensity |
|            |             |                                                                                             |                                                          | tCO <sub>2</sub> eq/M-JPY                                                   | tCO <sub>2</sub> eq/M-JPY                             | tCO <sub>2</sub> eq/M-JPY                           | tCO <sub>2</sub> eq/M-JPY                                      | %                                           |
| JD353      | 821304      | Other educational and training institutions (profit-making)                                 | その他の教育訓練機関(産業)                                           | 5.37E-2                                                                     | 8.70E-4                                               | 3.16E-3                                             | 4.96E-2                                                        | 8.34E+0                                     |
| JD354      | 822101      | Research institutes for natural science (public) **                                         | 自然科学研究機関(国公立)★★                                          | 1.16E-1                                                                     | 4.62E-4                                               | 9.04E-3                                             | 1.07E-1                                                        | 8.31E+0                                     |
| JD355      | 822102      | Research institutes for cultural and social science (public) **                             | 人文科学研究機関(国公立)★★                                          | 6.67E-2                                                                     | 5.85E-4                                               | 5.47E-3                                             | 6.06E-2                                                        | 7.97E+0                                     |
| JD356      | 822103      | Research institutes for natural sciences (private, non-profit) *                            | 自然科学研究機関(非営利)★                                           | 1.02E-1                                                                     | 3.28E-4                                               | 2.01E-2                                             | 8.16E-2                                                        | 7.28E+0                                     |
| JD357      | 822104      | Research institutes for cultural and social science (private, non-profit) *                 | 人文科学研究機関(非営利)★                                           | 4.45E-2                                                                     | 1.58E-4                                               | 1.33E-2                                             | 3.11E-2                                                        | 6.13E+0                                     |
| JD358      | 822105      | Research institutes for natural sciences (profit-making)                                    | 自然科学研究機関(産業)                                             | 1.50E-1                                                                     | 1.10E-3                                               | 8.20E-3                                             | 1.41E-1                                                        | 7.79E+0                                     |
| JD359      | 822106      | Research institutes for cultural and social science (profit-making)                         | 人文科学研究機関(産業)                                             | 3.26E-2                                                                     | 1.66E-4                                               | 2.94E-3                                             | 2.95E-2                                                        | 9.31E+0                                     |
| JD360      | 822201      | Research and development (intra-enterprise)                                                 | 企業内研究開発                                                  | 6.64E-2                                                                     | 2.48E-4                                               | 6.54E-3                                             | 5.96E-2                                                        | 8.53E+0                                     |
| JD361      | 831101      | Medical service (public)                                                                    | 医療(国公立)                                                  | 7.18E-2                                                                     | 2.07E-4                                               | 1.80E-2                                             | 5.36E-2                                                        | 9.08E+0                                     |
| JD362      | 831102      | Medical service (non-profit foundations, etc.)                                              | 医療(公益法人等)                                                | 5.92E-2                                                                     | 1.53E-4                                               | 1.47E-2                                             | 4.43E-2                                                        | 9.24E+0                                     |
| JD363      | 831103      | Medical service (medical corporations, etc.)                                                | 医療(医療法人等)                                                | 5.88E-2                                                                     | 1.24E-4                                               | 1.38E-2                                             | 4.49E-2                                                        | 9.78E+0                                     |
| JD364      | 831201      | Health and hygiene (public) **                                                              | 保健衛生(国公立)★★                                              | 4.27E-2                                                                     | 2.27E-4                                               | 1.38E-2                                             | 2.86E-2                                                        | 5.61E+0                                     |
| JD365      | 831202      | Health and hygiene (profit-making)                                                          | 保健衛生(産業)                                                 | 6.76E-2                                                                     | 1.71E-4                                               | 2.96E-2                                             | 3.78E-2                                                        | 5.07E+0                                     |
| JD366      | 831301      | Social insurance (public) **                                                                | 社会保険事業(国公立)★★                                            | 3.90E-2                                                                     | 1.02E-4                                               | 8.14E-3                                             | 3.08E-2                                                        | 6.93E+0                                     |
| JD367      | 831302      | Social insurance (private, non-profit) *                                                    | 社会保険事業(非営利)★                                             | 4.57E-2                                                                     | 1.39E-4                                               | 9.43E-3                                             | 3.61E-2                                                        | 7.70E+0                                     |
| JD368      | 831303      | Social welfare (public) **                                                                  | 社会福祉(国公立)★★                                              | 7.91E-2                                                                     | 1.45E-4                                               | 2.69E-2                                             | 5.21E-2                                                        | 8.82E+0                                     |
| JD369      | 831304      | Social welfare (private, non-profit) *                                                      | 社会福祉(非営利)★                                               | 7.98E-2                                                                     | 1.10E-4                                               | 2.88E-2                                             | 5.10E-2                                                        | 8.66E+0                                     |
| JD370      | 831305      | Social welfare (profit-making)                                                              | 社会福祉(産業)                                                 | 7.96E-2                                                                     | 1.78E-4                                               | 2.68E-2                                             | 5.27E-2                                                        | 8.42E+0                                     |
| JD371      | 831401      | Nursing care (In-home)                                                                      | 介護(居宅)                                                   | 8.02E-2                                                                     | 1.03E-4                                               | 3.14E-2                                             | 4.88E-2                                                        | 8.48E+0                                     |
| JD372      | 831402      | Nursing care (In-facility)                                                                  | 介護(施設)                                                   | 9.93E-2                                                                     | 1.67E-4                                               | 3.82E-2                                             | 6.09E-2                                                        | 8.77E+0                                     |
| JD373      | 841101      | Private non-profit institutions serving enterprises                                         | 対企業民間非営利団体                                               | 3.99E-2                                                                     | 2.38E-4                                               | 4.00E-3                                             | 3.57E-2                                                        | 8.90E+0                                     |
| JD374      | 841102      | Private non-profit institutions serving households, n.e.c. *                                | 対家計民間非営利団体(除別掲)★                                         | 3.13E-2                                                                     | 1.41E-4                                               | 4.54E-3                                             | 2.67E-2                                                        | 8.16E+0                                     |
| JD375      | 851101      | Advertising services                                                                        | 広告                                                       | 4.20E-2                                                                     | 5.54E-5                                               | 4.60E-3                                             | 3.73E-2                                                        | 1.06E+1                                     |
| JD376      | 851201      | Goods rental and leasing (except car rental)                                                | 物品賃貸業(除貸自動車)                                             | 1.91E-2                                                                     | 1.81E-5                                               | 1.67E-3                                             | 1.74E-2                                                        | 9.83E+0                                     |
| JD377      | 851301      | Car rental and leasing                                                                      | 貸自動車業                                                    | 2.64E-2                                                                     | 1.57E-4                                               | 2.99E-3                                             | 2.32E-2                                                        | 7.98E+0                                     |
| JD378      | 851410      | Repair of motor vehicles                                                                    | 自動車修理                                                    | 6.30E-2                                                                     | 3.49E-5                                               | 6.70E-3                                             | 5.63E-2                                                        | 8.73E+0                                     |
| JD379      | 851510      | Repair of machine                                                                           | 機械修理                                                     | 5.55E-2                                                                     | 2.18E-5                                               | 5.25E-3                                             | 5.03E-2                                                        | 8.03E+0                                     |
| JD380      | 851901      | Building maintenance services                                                               | 建物サービス                                                   | 2.18E-2                                                                     | 6.05E-5                                               | 4.06E-3                                             | 1.77E-2                                                        | 1.50E+1                                     |
| JD381      | 851902      | Judicial, financial and accounting services                                                 | 法務・財務・会計サービス                                             | 1.52E-2                                                                     | 8.16E-5                                               | 1.48E-3                                             | 1.37E-2                                                        | 1.11E+1                                     |
| JD382      | 851903      | Civil engineering and construction services                                                 | 土木建築サービス                                                 | 2.64E-2                                                                     | 1.34E-4                                               | 1.81E-3                                             | 2.44E-2                                                        | 9.74E+0                                     |
| JD383      | 851904      | Worker dispatching services                                                                 | 労働者派遣サービス                                                | 3.79E-3                                                                     | 1.03E-5                                               | 3.69E-4                                             | 3.41E-3                                                        | 1.33E+1                                     |
| JD384      | 851909      | Other business services                                                                     | その他の対事業所サービス                                             | 1.66E-2                                                                     | 2.21E-5                                               | 1.34E-3                                             | 1.53E-2                                                        | 1.27E+1                                     |
| JD385      | 861101      | Movie theaters                                                                              | 映画館                                                      | 8.27E-2                                                                     | 3.14E-4                                               | 1.49E-2                                             | 6.74E-2                                                        | 9.23E+0                                     |
| JD386      | 861102      | Performances (except otherwise classified), theatrical companies                            | 興行場(除別掲)・興行団                                             | 7.75E-2                                                                     | 3.89E-5                                               | 7.28E-3                                             | 7.02E-2                                                        | 1.76E+1                                     |
| JD387      | 861103      | Amusement and recreation facilities                                                         | 遊戯場                                                      | 6.42E-2                                                                     | 3.30E-4                                               | 1.23E-2                                             | 5.16E-2                                                        | 6.43E+0                                     |
| JD388      | 861104      | Stadiums and companies of bicycle, horse, motorcar and motorboat races                      | 競輪・競馬等の競走場・競技団                                           | 1.02E-1                                                                     | 1.21E-4                                               | 6.90E-3                                             | 9.54E-2                                                        | 1.72E+1                                     |
| JD389      | 861105      | Sport facility service, public gardens and amusement parks                                  | スポーツ施設提供業・公園・遊園地                                         | 5.48E-2                                                                     | 1.72E-4                                               | 1.30E-2                                             | 4.17E-2                                                        | 7.89E+0                                     |
| JD390      | 861109      | Other amusement and recreation services                                                     | その他の娯楽                                                   | 6.29E-2                                                                     | 1.55E-4                                               | 1.98E-2                                             | 4.29E-2                                                        | 5.75E+0                                     |
| JD391      | 861201      | General eating and drinking places (except coffee shops)                                    | 一般飲食店(除喫茶店)                                              | 3.98E-1                                                                     | 2.27E-4                                               | 1.25E-1                                             | 2.73E-1                                                        | 1.15E+1                                     |
| JD392      | 861202      | Coffee shops                                                                                | 喫茶店                                                      | 2.95E-1                                                                     | 3.38E-4                                               | 9.61E-2                                             | 1.99E-1                                                        | 1.09E+1                                     |
| JD393      | 861203      | Eating and drinking places for pleasures                                                    | 遊興飲食店                                                    | 2.43E-1                                                                     | 2.35E-4                                               | 7.04E-2                                             | 1.73E-1                                                        | 1.18E+1                                     |
| JD394      | 861301      | Hotels                                                                                      | 宿泊業                                                      | 2.45E-1                                                                     | 2.87E-4                                               | 9.57E-2                                             | 1.49E-1                                                        | 8.99E+0                                     |
| JD395      | 861401      | Cleaning                                                                                    | 洗濯業                                                      | 6.71E-2                                                                     | 4.46E-4                                               | 2.61E-2                                             | 4.06E-2                                                        | 5.05E+0                                     |
| JD396      | 861402      | Barber shops                                                                                | 理容業                                                      | 3.19E-2                                                                     | 3.67E-4                                               | 3.99E-3                                             | 2.75E-2                                                        | 7.47E+0                                     |
| JD397      | 861403      | Beauty shops                                                                                | 美容業                                                      | 3.17E-2                                                                     | 2.05E-4                                               | 7.93E-3                                             | 2.35E-2                                                        | 6.62E+0                                     |
| JD398      | 861404      | Public baths                                                                                | 浴場業                                                      | 1.16E-1                                                                     | 1.53E-3                                               | 2.40E-2                                             | 9.09E-2                                                        | 6.12E+0                                     |
| JD399      | 861409      | Other cleaning, barber shops, beauty shops and public baths                                 | その他の洗濯・理容・美容・浴場業                                         | 4.38E-2                                                                     | 2.99E-4                                               | 8.93E-3                                             | 3.46E-2                                                        | 7.13E+0                                     |
| JD400      | 861901      | Photographic studios                                                                        | 写真業                                                      | 4.26E-2                                                                     | 4.94E-5                                               | 1.00E-2                                             | 3.26E-2                                                        | 9.02E+0                                     |
| JD401      | 861902      | Ceremonial occasions                                                                        | 冠婚葬祭業                                                    | 1.05E-1                                                                     | 3.82E-4                                               | 2.91E-2                                             | 7.56E-2                                                        | 6.93E+0                                     |
| JD402      | 861903      | Miscellaneous repairs, n.e.c.                                                               | 各種修理業(除別掲)                                               | 7.91E-2                                                                     | 1.96E-4                                               | 3.53E-2                                             | 4.36E-2                                                        | 4.47E+0                                     |
| JD403      | 861904      | Supplementary tutorial schools, instruction services for arts, culture and technical skills | 個人教授業                                                    | 3.34E-2                                                                     | 8.06E-5                                               | 7.32E-3                                             | 2.60E-2                                                        | 6.18E+0                                     |
| JD404      | 861909      | Other personal services                                                                     | その他の対個人サービス                                              | 4.02E-2                                                                     | 1.34E-4                                               | 1.40E-2                                             | 2.60E-2                                                        | 5.73E+0                                     |
| JD405      | 890000      | Office supplies                                                                             | 事務用品                                                     | 9.26E-2                                                                     | 0.00E+0                                               | 7.45E-3                                             | 8.52E-2                                                        | 8.26E+0                                     |
| JD406      | 900000      | Activities not elsewhere classified                                                         | 分類不明                                                     | 8.97E-2                                                                     | 2.87E-4                                               | 2.08E-2                                             | 6.86E-2                                                        | 6.67E+0                                     |





Table A5: Embodied global N<sub>2</sub>O intensities of Japanese goods and services based on producer price in 2005 [2/5]

| Sector no. | Sector code | Sector name<br>[Japanese domestic commodity]                | Sector name in Japanese<br>[Japanese domestic commodity] | Embodied global N <sub>2</sub> O intensities based on producer price in 2005 |                                                       |                                                     |                                                                |                                             |
|------------|-------------|-------------------------------------------------------------|----------------------------------------------------------|------------------------------------------------------------------------------|-------------------------------------------------------|-----------------------------------------------------|----------------------------------------------------------------|---------------------------------------------|
|            |             |                                                             |                                                          | Total                                                                        | (D) Direct emissions<br>in Japan during<br>production | (S) Induced<br>emissions in Japan<br>through supply | (F) Induced emissions<br>in foreign country's<br>supply chains | Coefficient of variance<br>of the intensity |
|            |             |                                                             |                                                          | tCO <sub>2</sub> eq/M-JPY                                                    | tCO <sub>2</sub> eq/M-JPY                             | tCO <sub>2</sub> eq/M-JPY                           | tCO <sub>2</sub> eq/M-JPY                                      | %                                           |
| JD93       | 161909      | Other wooden products                                       | その他の木製品                                                  | 4.10E-2                                                                      | 5.37E-4                                               | 1.51E-2                                             | 2.53E-2                                                        | 4.55E+0                                     |
| JD94       | 171101      | Wooden furniture and fixtures                               | 木製家具・装備品                                                 | 4.01E-2                                                                      | 8.60E-4                                               | 1.87E-2                                             | 2.05E-2                                                        | 4.93E+0                                     |
| JD95       | 171102      | Wooden fixtures                                             | 木製建具                                                     | 4.63E-2                                                                      | 1.22E-3                                               | 2.15E-2                                             | 2.35E-2                                                        | 4.40E+0                                     |
| JD96       | 171103      | Metallic furniture and fixture                              | 金属製家具・装備品                                                | 3.84E-2                                                                      | 1.02E-3                                               | 2.35E-2                                             | 1.38E-2                                                        | 4.33E+0                                     |
| JD97       | 181101      | Pulp                                                        | パルプ                                                      | 2.26E-1                                                                      | 1.40E-1                                               | 5.14E-2                                             | 3.54E-2                                                        | 1.80E+0                                     |
| JD98       | 181201      | Paper                                                       | 洋紙・和紙                                                    | 1.78E-1                                                                      | 4.93E-2                                               | 8.91E-2                                             | 3.96E-2                                                        | 3.25E+0                                     |
| JD99       | 181202      | Paperboard                                                  | 板紙                                                       | 1.48E-1                                                                      | 2.34E-2                                               | 9.66E-2                                             | 2.78E-2                                                        | 2.30E+0                                     |
| JD100      | 181301      | Corrugated cardboard                                        | 段ボール                                                     | 1.00E-1                                                                      | 1.55E-3                                               | 6.55E-2                                             | 3.33E-2                                                        | 4.97E+0                                     |
| JD101      | 181302      | Coated paper and building<br>(construction) paper           | 塗工紙・建設用加工紙                                               | 9.03E-2                                                                      | 4.93E-3                                               | 5.05E-2                                             | 3.49E-2                                                        | 5.90E+0                                     |
| JD102      | 182101      | Corrugated card board boxes                                 | 段ボール箱                                                    | 5.15E-2                                                                      | 1.12E-3                                               | 3.19E-2                                             | 1.85E-2                                                        | 5.13E+0                                     |
| JD103      | 182109      | Other paper containers                                      | その他の紙製容器                                                 | 5.57E-2                                                                      | 2.13E-3                                               | 3.28E-2                                             | 2.07E-2                                                        | 5.37E+0                                     |
| JD104      | 182901      | Paper textile for medical use                               | 紙製衛生材料・用品                                                | 7.23E-2                                                                      | 4.83E-3                                               | 4.49E-2                                             | 2.26E-2                                                        | 4.34E+0                                     |
| JD105      | 182909      | Other pulp, paper and processed paper<br>products           | その他のパルプ・紙・紙加工品                                           | 5.36E-2                                                                      | 2.60E-3                                               | 3.56E-2                                             | 1.54E-2                                                        | 3.83E+0                                     |
| JD106      | 191101      | Printing, plate making and book binding                     | 印刷・製版・製本                                                 | 4.02E-2                                                                      | 1.45E-3                                               | 2.57E-2                                             | 1.31E-2                                                        | 4.60E+0                                     |
| JD107      | 201101      | Chemical fertilizer                                         | 化学肥料                                                     | 1.58E-1                                                                      | 3.40E-2                                               | 5.83E-2                                             | 6.57E-2                                                        | 8.27E+0                                     |
| JD108      | 202101      | Industrial soda chemicals                                   | ソーダ工業製品                                                  | 1.46E-1                                                                      | 2.74E-2                                               | 9.45E-2                                             | 2.40E-2                                                        | 2.32E+0                                     |
| JD109      | 202901      | Inorganic pigment                                           | 無機顔料                                                     | 1.14E-1                                                                      | 8.85E-3                                               | 6.89E-2                                             | 3.63E-2                                                        | 4.64E+0                                     |
| JD110      | 202902      | Compressed gas and liquefied gas                            | 圧縮ガス・液化ガス                                                | 9.82E-2                                                                      | 4.26E-3                                               | 7.56E-2                                             | 1.84E-2                                                        | 2.55E+0                                     |
| JD111      | 202903      | Salt                                                        | 塩                                                        | 7.17E-2                                                                      | 3.37E-2                                               | 2.06E-2                                             | 1.75E-2                                                        | 2.66E+0                                     |
| JD112      | 202909      | Other industrial inorganic chemicals                        | その他の無機化学工業製品                                             | 1.13E+0                                                                      | 1.02E+0                                               | 8.05E-2                                             | 3.77E-2                                                        | 3.72E-1                                     |
| JD113      | 203101      | Petrochemical basic products                                | 石油化学基礎製品                                                 | 1.83E-1                                                                      | 1.77E-2                                               | 3.35E-2                                             | 1.32E-1                                                        | 2.01E+1                                     |
| JD114      | 203102      | Petrochemical aromatic products<br>(except synthetic resin) | 石油化学系芳香族製品                                               | 1.49E-1                                                                      | 1.90E-2                                               | 2.32E-2                                             | 1.07E-1                                                        | 2.06E+1                                     |
| JD115      | 203201      | Aliphatic intermediates                                     | 脂肪族中間物                                                   | 5.31E-1                                                                      | 2.90E-1                                               | 1.57E-1                                             | 8.36E-2                                                        | 3.52E+0                                     |
| JD116      | 203202      | Cyclic intermediates                                        | 環状中間物                                                    | 1.69E-1                                                                      | 2.62E-2                                               | 4.16E-2                                             | 1.01E-1                                                        | 1.37E+1                                     |
| JD117      | 203301      | Synthetic rubber                                            | 合成ゴム                                                     | 1.69E-1                                                                      | 5.29E-2                                               | 5.95E-2                                             | 5.69E-2                                                        | 7.73E+0                                     |
| JD118      | 203901      | Methane derivatives                                         | メタン誘導品                                                   | 2.69E-1                                                                      | 3.56E-2                                               | 1.96E-1                                             | 3.80E-2                                                        | 2.41E+0                                     |
| JD119      | 203902      | Oil and fat industrial chemicals                            | 油脂加工製品                                                   | 3.70E-1                                                                      | 9.69E-3                                               | 8.34E-2                                             | 2.77E-1                                                        | 1.72E+1                                     |
| JD120      | 203903      | Plasticizers                                                | 可塑剤                                                      | 2.57E-1                                                                      | 1.22E-2                                               | 1.68E-1                                             | 7.64E-2                                                        | 6.77E+0                                     |
| JD121      | 203904      | Synthetic dyes                                              | 合成染料                                                     | 1.96E-1                                                                      | 3.59E-2                                               | 7.90E-2                                             | 8.08E-2                                                        | 1.18E+1                                     |
| JD122      | 203909      | Other industrial organic chemicals                          | その他の有機化学工業製品                                             | 1.30E-1                                                                      | 8.59E-3                                               | 7.01E-2                                             | 5.13E-2                                                        | 6.47E+0                                     |
| JD123      | 204101      | Thermo-setting resins                                       | 熱硬化性樹脂                                                   | 1.76E-1                                                                      | 3.63E-3                                               | 9.98E-2                                             | 7.23E-2                                                        | 8.78E+0                                     |
| JD124      | 204102      | Thermoplastics resins                                       | 熱可塑性樹脂                                                   | 1.64E-1                                                                      | 4.62E-3                                               | 8.02E-2                                             | 7.90E-2                                                        | 1.15E+1                                     |
| JD125      | 204103      | High function resins                                        | 高機能性樹脂                                                   | 1.62E-1                                                                      | 2.75E-3                                               | 9.13E-2                                             | 6.79E-2                                                        | 9.19E+0                                     |
| JD126      | 204109      | Other resins                                                | その他の合成樹脂                                                 | 2.10E-1                                                                      | 3.16E-3                                               | 1.35E-1                                             | 7.17E-2                                                        | 7.74E+0                                     |
| JD127      | 205101      | Rayon and acetate                                           | レーヨン・アセテート                                               | 2.03E-1                                                                      | 8.56E-2                                               | 6.85E-2                                             | 4.87E-2                                                        | 3.21E+0                                     |
| JD128      | 205102      | Synthetic fibers                                            | 合成繊維                                                     | 1.78E-1                                                                      | 2.98E-2                                               | 9.48E-2                                             | 5.33E-2                                                        | 6.31E+0                                     |
| JD129      | 206101      | Medicaments                                                 | 医薬品                                                      | 7.35E-2                                                                      | 1.34E-3                                               | 3.35E-2                                             | 3.86E-2                                                        | 7.94E+0                                     |
| JD130      | 207101      | Soap, synthetic detergents and surface<br>active agents     | 石けん・合成洗剤・界面活性剤                                           | 1.26E-1                                                                      | 5.31E-3                                               | 6.75E-2                                             | 5.34E-2                                                        | 8.17E+0                                     |
| JD131      | 207102      | Cosmetics, toilet preparations and<br>dentifrices           | 化粧品・歯磨                                                   | 6.03E-2                                                                      | 6.03E-4                                               | 3.69E-2                                             | 2.28E-2                                                        | 6.14E+0                                     |
| JD132      | 207201      | Paint and varnishes                                         | 塗料                                                       | 1.45E-1                                                                      | 1.22E-3                                               | 8.88E-2                                             | 5.48E-2                                                        | 6.57E+0                                     |
| JD133      | 207202      | Printing ink                                                | 印刷インキ                                                    | 1.69E-1                                                                      | 4.35E-4                                               | 8.66E-2                                             | 8.16E-2                                                        | 8.34E+0                                     |
| JD134      | 207301      | Photographic sensitive materials                            | 写真感光材料                                                   | 1.16E-1                                                                      | 7.44E-3                                               | 7.97E-2                                             | 2.90E-2                                                        | 3.51E+0                                     |
| JD135      | 207401      | Agricultural chemicals                                      | 農薬                                                       | 1.09E-1                                                                      | 1.29E-2                                               | 6.08E-2                                             | 3.51E-2                                                        | 6.73E+0                                     |
| JD136      | 207901      | Gelatin and adhesives                                       | ゼラチン・接着剤                                                 | 1.42E-1                                                                      | 6.46E-3                                               | 7.10E-2                                             | 6.49E-2                                                        | 7.28E+0                                     |
| JD137      | 207909      | Other final chemical products                               | その他の化学最終製品                                               | 1.68E-1                                                                      | 7.56E-3                                               | 9.07E-2                                             | 6.97E-2                                                        | 6.64E+0                                     |
| JD138      | 211101      | Petroleum refinery products (inc.<br>greases)               | 石油製品                                                     | 2.75E-1                                                                      | 1.21E-2                                               | 3.95E-3                                             | 2.59E-1                                                        | 1.72E+1                                     |
| JD139      | 212101      | Coal products                                               | 石炭製品                                                     | 3.90E-2                                                                      | 1.14E-3                                               | 4.34E-3                                             | 3.35E-2                                                        | 9.77E+0                                     |
| JD140      | 212102      | Paving materials                                            | 舗装材料                                                     | 8.99E-2                                                                      | 3.60E-5                                               | 2.14E-2                                             | 6.85E-2                                                        | 1.34E+1                                     |
| JD141      | 221101      | Plastic products                                            | プラスチック製品                                                 | 7.25E-2                                                                      | 2.83E-4                                               | 3.75E-2                                             | 3.47E-2                                                        | 9.15E+0                                     |
| JD142      | 231101      | Tires and inner tubes                                       | タイヤ・チューブ                                                 | 1.99E-1                                                                      | 1.11E-3                                               | 3.69E-2                                             | 1.61E-1                                                        | 1.24E+1                                     |
| JD143      | 231901      | Rubber footwear                                             | ゴム製履物                                                    | 7.58E-2                                                                      | 2.25E-3                                               | 1.61E-2                                             | 5.74E-2                                                        | 1.08E+1                                     |
| JD144      | 231902      | Plastic footwear                                            | プラスチック製履物                                                | 4.35E-2                                                                      | 2.48E-3                                               | 2.12E-2                                             | 1.99E-2                                                        | 7.50E+0                                     |
| JD145      | 231909      | Other rubber products                                       | その他のゴム製品                                                 | 7.93E-2                                                                      | 7.67E-4                                               | 2.77E-2                                             | 5.09E-2                                                        | 9.24E+0                                     |
| JD146      | 241101      | Leather footwear                                            | 革製履物                                                     | 1.62E-1                                                                      | 6.70E-4                                               | 3.04E-2                                             | 1.31E-1                                                        | 1.22E+1                                     |
| JD147      | 241201      | Leather and fur skins                                       | 製革・毛皮                                                    | 9.83E-1                                                                      | 4.03E-3                                               | 1.55E-1                                             | 8.24E-1                                                        | 1.40E+1                                     |
| JD148      | 241202      | Miscellaneous leather products                              | かばん・袋物・その他の革製品                                           | 1.28E-1                                                                      | 5.95E-4                                               | 2.93E-2                                             | 9.80E-2                                                        | 1.08E+1                                     |
| JD149      | 251101      | Sheet glass and safety glass                                | 板ガラス・安全ガラス                                               | 1.68E-1                                                                      | 1.18E-1                                               | 3.21E-2                                             | 1.86E-2                                                        | 1.52E+0                                     |
| JD150      | 251201      | Glass fiber and glass fiber products,<br>n.e.c.             | ガラス繊維・同製品                                                | 7.55E-2                                                                      | 1.05E-2                                               | 4.08E-2                                             | 2.42E-2                                                        | 5.04E+0                                     |
| JD151      | 251909      | Other glass products                                        | その他のガラス製品                                                | 6.29E-2                                                                      | 8.04E-3                                               | 3.82E-2                                             | 1.66E-2                                                        | 3.71E+0                                     |
| JD152      | 252101      | Cement                                                      | セメント                                                     | 1.72E+0                                                                      | 1.64E+0                                               | 6.10E-2                                             | 2.37E-2                                                        | 1.80E-1                                     |
| JD153      | 252201      | Ready mixed concrete                                        | 生コンクリート                                                  | 3.59E-1                                                                      | 1.36E-2                                               | 3.26E-1                                             | 1.87E-2                                                        | 7.83E-1                                     |
| JD154      | 252301      | Cement products                                             | セメント製品                                                   | 1.66E-1                                                                      | 5.50E-2                                               | 9.82E-2                                             | 1.24E-2                                                        | 9.74E-1                                     |
| JD155      | 253101      | Pottery, china and earthenware                              | 陶磁器                                                      | 6.56E-2                                                                      | 2.16E-2                                               | 2.21E-2                                             | 2.19E-2                                                        | 4.78E+0                                     |
| JD156      | 259901      | Clay refractories                                           | 耐火物                                                      | 8.09E-2                                                                      | 1.19E-2                                               | 4.17E-2                                             | 2.74E-2                                                        | 4.02E+0                                     |
| JD157      | 259902      | Other structural clay products                              | その他の建設用土石製品                                              | 1.03E-1                                                                      | 3.09E-2                                               | 3.25E-2                                             | 3.96E-2                                                        | 5.31E+0                                     |
| JD158      | 259903      | Carbon and graphite products                                | 炭素・黒鉛製品                                                  | 7.19E-2                                                                      | 1.35E-2                                               | 3.08E-2                                             | 2.75E-2                                                        | 6.01E+0                                     |
| JD159      | 259904      | Abrasive                                                    | 研磨材                                                      | 4.81E-2                                                                      | 6.12E-3                                               | 1.81E-2                                             | 2.39E-2                                                        | 6.21E+0                                     |
| JD160      | 259909      | Miscellaneous ceramic, stone and clay<br>products           | その他の窯業・土石製品                                              | 1.92E-1                                                                      | 1.39E-1                                               | 3.02E-2                                             | 2.33E-2                                                        | 1.59E+0                                     |
| JD161      | 261101      | Pig iron                                                    | 鉄鉄                                                       | 1.84E-1                                                                      | 1.38E-1                                               | 1.61E-2                                             | 3.00E-2                                                        | 1.95E+0                                     |
| JD162      | 261102      | Ferro alloys                                                | フェロアロイ                                                   | 8.43E-2                                                                      | 2.62E-2                                               | 2.88E-2                                             | 2.93E-2                                                        | 3.54E+0                                     |
| JD163      | 261103      | Crude steel (converters)                                    | 粗鋼(転炉)                                                   | 1.23E-1                                                                      | 3.14E-3                                               | 9.36E-2                                             | 2.60E-2                                                        | 1.96E+0                                     |
| JD164      | 261104      | Crude steel (electric furnaces)                             | 粗鋼(電気炉)                                                  | 6.00E-2                                                                      | 2.68E-3                                               | 3.16E-2                                             | 2.58E-2                                                        | 5.49E+0                                     |
| JD165      | 261201      | Scrap iron                                                  | 鉄屑                                                       | 0.00E+0                                                                      | 0.00E+0                                               | 0.00E+0                                             | 0.00E+0                                                        | 0.00E+0                                     |
| JD166      | 262101      | Hot rolled steel                                            | 熱間圧延鋼材                                                   | 8.19E-2                                                                      | 4.47E-3                                               | 5.75E-2                                             | 2.00E-2                                                        | 2.26E+0                                     |
| JD167      | 262201      | Steel pipes and tubes                                       | 鋼管                                                       | 6.09E-2                                                                      | 3.45E-3                                               | 4.11E-2                                             | 1.64E-2                                                        | 2.85E+0                                     |
| JD168      | 262301      | Cold-finished steel                                         | 冷間仕上鋼材                                                   | 7.45E-2                                                                      | 6.03E-3                                               | 4.97E-2                                             | 1.87E-2                                                        | 2.40E+0                                     |
| JD169      | 262302      | Coated steel                                                | めっき鋼材                                                    | 6.40E-2                                                                      | 3.70E-3                                               | 4.38E-2                                             | 1.66E-2                                                        | 2.61E+0                                     |
| JD170      | 263101      | Cast and forged steel                                       | 鑄鍛鋼                                                      | 5.02E-2                                                                      | 4.76E-3                                               | 3.05E-2                                             | 1.49E-2                                                        | 3.17E+0                                     |
| JD171      | 263102      | Cast iron pipes and tubes                                   | 鑄鉄管                                                      | 6.30E-2                                                                      | 1.58E-2                                               | 3.18E-2                                             | 1.53E-2                                                        | 3.47E+0                                     |
| JD172      | 263103      | Cast and forged materials (iron)                            | 鑄鉄品及び鍛工品(鉄)                                              | 7.16E-2                                                                      | 1.29E-2                                               | 4.41E-2                                             | 1.46E-2                                                        | 2.61E+0                                     |
| JD173      | 264901      | Iron and steel shearing and slitting                        | 鉄鋼シャースリット業                                               | 5.54E-2                                                                      | 1.26E-3                                               | 3.99E-2                                             | 1.43E-2                                                        | 2.61E+0                                     |
| JD174      | 264909      | Other iron or steel products                                | その他の鉄鋼製品                                                 | 4.59E-2                                                                      | 2.62E-3                                               | 3.18E-2                                             | 1.15E-2                                                        | 2.78E+0                                     |
| JD175      | 271101      | Copper                                                      | 銅                                                        | 5.89E-2                                                                      | 5.63E-3                                               | 9.27E-3                                             | 4.40E-2                                                        | 1.11E+1                                     |
| JD176      | 271102      | Lead and zinc (inc. regenerated lead)                       | 鉛・亜鉛(含再生)                                                | 5.68E-2                                                                      | 5.94E-3                                               | 2.30E-2                                             | 2.79E-2                                                        | 5.98E+0                                     |
| JD177      | 271103      | Aluminum (inc. regenerated aluminum)                        | アルミニウム(含再生)                                              | 5.43E-2                                                                      | 9.68E-3                                               | 1.60E-2                                             | 2.86E-2                                                        | 5.23E+0                                     |
| JD178      | 271109      | Other non-ferrous metals                                    | その他の非鉄金属地金                                               | 5.07E-2                                                                      | 1.29E-3                                               | 1.29E-2                                             | 3.65E-2                                                        | 1.01E+1                                     |
| JD179      | 271201      | Non-ferrous metal scrap                                     | 非鉄金属屑                                                    | 0.00E+0                                                                      | 0.00E+0                                               | 0.00E+0                                             | 0.00E+0                                                        | 0.00E+0                                     |
| JD180      | 272101      | Electric wires and cables                                   | 電線・ケーブル                                                  | 4.70E-2                                                                      | 9.67E-4                                               | 1.90E-2                                             | 2.71E-2                                                        | 6.26E+0                                     |
| JD181      | 272102      | Optical fiber cables                                        | 光ファイバケーブル                                                | 8.13E-2                                                                      | 1.39E-3                                               | 5.30E-2                                             | 2.69E-2                                                        | 4.63E+0                                     |
| JD182      | 272201      | Rolled and drawn copper and copper<br>alloys                | 伸銅品                                                      | 4.69E-2                                                                      | 2.54E-3                                               | 1.37E-2                                             | 3.07E-2                                                        | 6.36E+0                                     |
| JD183      | 272202      | Rolled and drawn aluminum                                   | アルミ圧延製品                                                  | 5.86E-2                                                                      | 1.55E-3                                               | 9.17E-3                                             | 4.79E-2                                                        | 9.51E+0                                     |

Table A5: Embodied global N<sub>2</sub>O intensities of Japanese goods and services based on producer price in 2005 [3/5]

| Sector no. | Sector code | Sector name<br>[Japanese domestic commodity]               | Sector name in Japanese<br>[Japanese domestic commodity] | Embodied global N <sub>2</sub> O intensities based on producer price in 2005 |                                                       |                                                     |                                                                |                                             |
|------------|-------------|------------------------------------------------------------|----------------------------------------------------------|------------------------------------------------------------------------------|-------------------------------------------------------|-----------------------------------------------------|----------------------------------------------------------------|---------------------------------------------|
|            |             |                                                            |                                                          | Total                                                                        | (D) Direct emissions<br>in Japan during<br>production | (S) Induced<br>emissions in Japan<br>through supply | (F) Induced emissions<br>in foreign country's<br>supply chains | Coefficient of variance<br>of the intensity |
|            |             |                                                            |                                                          | tCO <sub>2</sub> eq/M-JPY                                                    | tCO <sub>2</sub> eq/M-JPY                             | tCO <sub>2</sub> eq/M-JPY                           | tCO <sub>2</sub> eq/M-JPY                                      | %                                           |
| JD184      | 272203      | Non-ferrous metal castings and forgings                    | 非鉄金属素形材                                                  | 4.96E-2                                                                      | 2.86E-3                                               | 1.67E-2                                             | 3.00E-2                                                        | 5.39E+0                                     |
| JD185      | 272204      | Nuclear fuels                                              | 核燃料                                                      | 3.96E-2                                                                      | 7.46E-4                                               | 1.56E-2                                             | 2.32E-2                                                        | 3.50E+0                                     |
| JD186      | 272209      | Other non-ferrous metal products                           | その他の非鉄金属製品                                               | 7.08E-2                                                                      | 1.70E-3                                               | 9.95E-3                                             | 5.91E-2                                                        | 5.46E+0                                     |
| JD187      | 281101      | Metal products for construction                            | 建設用金属製品                                                  | 3.96E-2                                                                      | 8.87E-4                                               | 2.59E-2                                             | 1.28E-2                                                        | 3.77E+0                                     |
| JD188      | 281201      | Metal products for architecture                            | 建築用金属製品                                                  | 3.46E-2                                                                      | 1.42E-3                                               | 1.67E-2                                             | 1.65E-2                                                        | 5.33E+0                                     |
| JD189      | 289101      | Gas and oil appliances and heating and cooking apparatus   | ガス・石油機器及び暖房機器                                            | 3.78E-2                                                                      | 1.17E-3                                               | 2.22E-2                                             | 1.45E-2                                                        | 4.22E+0                                     |
| JD190      | 289901      | Bolts, nuts, rivets and springs                            | ボルト・ナット・リベット及びスプリング                                      | 3.28E-2                                                                      | 1.62E-3                                               | 2.01E-2                                             | 1.11E-2                                                        | 4.04E+0                                     |
| JD191      | 289902      | Metal containers, fabricated plate and sheet metal         | 金属製容器及び製缶板金製品                                            | 3.45E-2                                                                      | 2.38E-3                                               | 2.13E-2                                             | 1.09E-2                                                        | 3.84E+0                                     |
| JD192      | 289903      | Plumber's supplies, powder metallurgy products and tools   | 配管工事付属品・粉末冶金製品・道具類                                       | 3.17E-2                                                                      | 1.68E-3                                               | 1.57E-2                                             | 1.43E-2                                                        | 4.55E+0                                     |
| JD193      | 289909      | Other metal products                                       | その他の金属製品                                                 | 3.06E-2                                                                      | 1.73E-3                                               | 1.74E-2                                             | 1.15E-2                                                        | 4.53E+0                                     |
| JD194      | 301101      | Boilers                                                    | ボイラ                                                      | 2.16E-2                                                                      | 8.43E-4                                               | 1.25E-2                                             | 8.21E-3                                                        | 4.75E+0                                     |
| JD195      | 301102      | Turbines                                                   | タービン                                                     | 3.04E-2                                                                      | 9.91E-4                                               | 1.60E-2                                             | 1.34E-2                                                        | 5.86E+0                                     |
| JD196      | 301103      | Engines                                                    | 原動機                                                      | 3.02E-2                                                                      | 7.79E-4                                               | 1.73E-2                                             | 1.20E-2                                                        | 4.68E+0                                     |
| JD197      | 301201      | Conveyors                                                  | 運搬機械                                                     | 2.97E-2                                                                      | 3.35E-4                                               | 1.68E-2                                             | 1.26E-2                                                        | 6.01E+0                                     |
| JD198      | 301301      | Refrigerators and air conditioning apparatus               | 冷凍機・温湿調整装置                                               | 2.54E-2                                                                      | 5.23E-4                                               | 1.41E-2                                             | 1.07E-2                                                        | 5.42E+0                                     |
| JD199      | 301901      | Pumps and compressors                                      | ポンプ及び圧縮機                                                 | 3.10E-2                                                                      | 4.50E-4                                               | 1.92E-2                                             | 1.14E-2                                                        | 4.46E+0                                     |
| JD200      | 301902      | Machinists' precision tools                                | 機械工具                                                     | 2.56E-2                                                                      | 5.66E-4                                               | 1.43E-2                                             | 1.08E-2                                                        | 5.30E+0                                     |
| JD201      | 301909      | Other general industrial machinery and equipment           | その他の一般産業機械及び装置                                           | 2.77E-2                                                                      | 7.49E-4                                               | 1.68E-2                                             | 1.01E-2                                                        | 4.52E+0                                     |
| JD202      | 302101      | Machinery and equipment for construction and mining        | 建設・鉱山機械                                                  | 3.53E-2                                                                      | 6.40E-4                                               | 1.90E-2                                             | 1.57E-2                                                        | 5.55E+0                                     |
| JD203      | 302201      | Chemical machinery                                         | 化学機械                                                     | 2.52E-2                                                                      | 3.12E-4                                               | 1.47E-2                                             | 1.02E-2                                                        | 5.07E+0                                     |
| JD204      | 302301      | Industrial robots                                          | 産業用ロボット                                                  | 2.71E-2                                                                      | 3.18E-4                                               | 1.61E-2                                             | 1.08E-2                                                        | 4.91E+0                                     |
| JD205      | 302401      | Metal machine tools                                        | 金属工作機械                                                   | 2.54E-2                                                                      | 2.58E-4                                               | 1.65E-2                                             | 8.62E-3                                                        | 4.22E+0                                     |
| JD206      | 302402      | Metal processing machinery                                 | 金属加工機械                                                   | 2.92E-2                                                                      | 6.16E-4                                               | 2.01E-2                                             | 8.41E-3                                                        | 3.54E+0                                     |
| JD207      | 302901      | Machinery for agricultural use                             | 農業用機械                                                    | 3.01E-2                                                                      | 9.47E-4                                               | 1.67E-2                                             | 1.25E-2                                                        | 5.01E+0                                     |
| JD208      | 302902      | Textile machinery                                          | 繊維機械                                                     | 2.61E-2                                                                      | 6.24E-4                                               | 1.48E-2                                             | 1.07E-2                                                        | 5.40E+0                                     |
| JD209      | 302903      | Food processing machinery and equipment                    | 食品機械・同装置                                                 | 2.87E-2                                                                      | 3.45E-4                                               | 1.66E-2                                             | 1.17E-2                                                        | 5.53E+0                                     |
| JD210      | 302904      | Semiconductor making equipment                             | 半導体製造装置                                                  | 2.85E-2                                                                      | 2.53E-4                                               | 1.51E-2                                             | 1.32E-2                                                        | 6.33E+0                                     |
| JD211      | 302905      | Vacuum equipment and vacuum component                      | 真空装置・真空機器                                                | 2.76E-2                                                                      | 5.61E-4                                               | 1.71E-2                                             | 9.94E-3                                                        | 4.28E+0                                     |
| JD212      | 302909      | Other special machinery for industrial use                 | その他の特殊産業用機械                                              | 2.68E-2                                                                      | 4.46E-4                                               | 1.54E-2                                             | 1.09E-2                                                        | 5.66E+0                                     |
| JD213      | 303101      | Metal molds                                                | 金型                                                       | 2.68E-2                                                                      | 5.39E-4                                               | 1.81E-2                                             | 8.21E-3                                                        | 3.64E+0                                     |
| JD214      | 303102      | Bearings                                                   | ベアリング                                                    | 3.53E-2                                                                      | 1.05E-3                                               | 2.33E-2                                             | 1.10E-2                                                        | 3.57E+0                                     |
| JD215      | 303109      | Other general machines and parts                           | その他の一般機械器具及び部品                                           | 2.89E-2                                                                      | 8.32E-4                                               | 1.65E-2                                             | 1.15E-2                                                        | 4.40E+0                                     |
| JD216      | 311101      | Copy machine                                               | 複写機                                                      | 3.42E-2                                                                      | 3.78E-4                                               | 1.86E-2                                             | 1.52E-2                                                        | 6.27E+0                                     |
| JD217      | 311109      | Other office machines                                      | その他の事務用機械                                                | 2.93E-2                                                                      | 2.50E-4                                               | 1.64E-2                                             | 1.26E-2                                                        | 6.13E+0                                     |
| JD218      | 311201      | Machinery for service industry                             | サービス用機器                                                  | 3.13E-2                                                                      | 3.42E-4                                               | 1.82E-2                                             | 1.28E-2                                                        | 5.30E+0                                     |
| JD219      | 321101      | Rotating electrical equipment                              | 回転電気機械                                                   | 3.06E-2                                                                      | 8.93E-4                                               | 1.73E-2                                             | 1.25E-2                                                        | 4.86E+0                                     |
| JD220      | 321102      | Transformers and reactors                                  | 変圧器・変成器                                                  | 3.34E-2                                                                      | 9.84E-5                                               | 1.69E-2                                             | 1.64E-2                                                        | 4.77E+0                                     |
| JD221      | 321103      | Relay switches and switchboards                            | 開閉制御装置及び配電盤                                              | 2.89E-2                                                                      | 4.17E-4                                               | 1.55E-2                                             | 1.30E-2                                                        | 5.34E+0                                     |
| JD222      | 321104      | Wiring devices and supplies                                | 配線器具                                                     | 2.76E-2                                                                      | 6.29E-4                                               | 1.42E-2                                             | 1.28E-2                                                        | 6.04E+0                                     |
| JD223      | 321105      | Electrical equipment for internal combustion engines       | 内燃機関電装品                                                  | 2.90E-2                                                                      | 4.03E-4                                               | 1.64E-2                                             | 1.22E-2                                                        | 5.05E+0                                     |
| JD224      | 321109      | Other electrical devices and parts                         | その他の産業用電気機器                                              | 3.47E-2                                                                      | 5.03E-4                                               | 1.89E-2                                             | 1.53E-2                                                        | 5.08E+0                                     |
| JD225      | 322101      | Applied electronic equipment                               | 電子応用装置                                                   | 2.48E-2                                                                      | 1.33E-4                                               | 1.20E-2                                             | 1.26E-2                                                        | 7.19E+0                                     |
| JD226      | 323101      | Electric measuring instruments                             | 電気計測器                                                    | 2.19E-2                                                                      | 1.97E-4                                               | 1.06E-2                                             | 1.11E-2                                                        | 6.94E+0                                     |
| JD227      | 324101      | Electric bulbs                                             | 電球類                                                      | 3.22E-2                                                                      | 1.95E-3                                               | 1.77E-2                                             | 1.25E-2                                                        | 5.27E+0                                     |
| JD228      | 324102      | Electric lighting fixtures and apparatus                   | 電気照明器具                                                   | 3.28E-2                                                                      | 9.31E-4                                               | 1.69E-2                                             | 1.49E-2                                                        | 7.84E+0                                     |
| JD229      | 324103      | Batteries                                                  | 電池                                                       | 5.93E-2                                                                      | 1.19E-3                                               | 3.13E-2                                             | 2.68E-2                                                        | 5.25E+0                                     |
| JD230      | 324109      | Other electrical devices and parts                         | その他の電気機械器具                                               | 4.31E-2                                                                      | 2.38E-3                                               | 1.39E-2                                             | 2.68E-2                                                        | 5.49E+0                                     |
| JD231      | 325101      | Household air-conditioners                                 | 民生用エアコンディショナ                                             | 3.01E-2                                                                      | 3.94E-4                                               | 1.61E-2                                             | 1.36E-2                                                        | 5.92E+0                                     |
| JD232      | 325102      | Household electric appliances (except air-conditioners)    | 民生用電気機器(除エアコン)                                           | 2.91E-2                                                                      | 1.65E-4                                               | 1.59E-2                                             | 1.30E-2                                                        | 5.95E+0                                     |
| JD233      | 331101      | Video recording and playback equipment                     | ビデオ機器                                                    | 2.92E-2                                                                      | 3.47E-5                                               | 1.52E-2                                             | 1.39E-2                                                        | 6.13E+0                                     |
| JD234      | 331102      | Electric audio equipment                                   | 電気音響機器                                                   | 2.77E-2                                                                      | 3.50E-4                                               | 1.50E-2                                             | 1.24E-2                                                        | 6.15E+0                                     |
| JD235      | 331103      | Radio and television sets                                  | ラジオ・テレビ受信機                                               | 3.14E-2                                                                      | 1.54E-4                                               | 1.83E-2                                             | 1.30E-2                                                        | 5.90E+0                                     |
| JD236      | 332101      | Wired communication equipment                              | 有線電気通信機器                                                 | 2.82E-2                                                                      | 3.31E-4                                               | 1.43E-2                                             | 1.36E-2                                                        | 6.31E+0                                     |
| JD237      | 332102      | Cellular phones                                            | 携帯電話機                                                    | 2.87E-2                                                                      | 3.59E-4                                               | 1.50E-2                                             | 1.34E-2                                                        | 6.41E+0                                     |
| JD238      | 332103      | Radio communication equipment (except cellular phones)     | 無線電気通信機器(除携帯電話機)                                         | 2.68E-2                                                                      | 3.93E-4                                               | 1.38E-2                                             | 1.26E-2                                                        | 6.42E+0                                     |
| JD239      | 332109      | Other communication equipment                              | その他の電気通信機器                                               | 2.76E-2                                                                      | 5.74E-4                                               | 1.64E-2                                             | 1.07E-2                                                        | 5.04E+0                                     |
| JD240      | 333101      | Personal Computers                                         | パーソナルコンピュータ                                              | 2.63E-2                                                                      | 1.65E-4                                               | 1.28E-2                                             | 1.33E-2                                                        | 6.99E+0                                     |
| JD241      | 333102      | Electronic computing equipment (except personal computers) | 電子計算機本体(除パソコン)                                           | 2.08E-2                                                                      | 1.82E-4                                               | 9.73E-3                                             | 1.09E-2                                                        | 7.39E+0                                     |
| JD242      | 333103      | Electronic computing equipment (accessory equipment)       | 電子計算機付属装置                                                | 2.55E-2                                                                      | 1.33E-4                                               | 1.36E-2                                             | 1.17E-2                                                        | 6.45E+0                                     |
| JD243      | 341101      | Semiconductor devices                                      | 半導体素子                                                    | 2.96E-2                                                                      | 3.38E-3                                               | 1.40E-2                                             | 1.23E-2                                                        | 5.08E+0                                     |
| JD244      | 341102      | Integrated circuits                                        | 集積回路                                                     | 3.69E-2                                                                      | 2.12E-3                                               | 2.03E-2                                             | 1.45E-2                                                        | 5.01E+0                                     |
| JD245      | 342101      | Electron tubes                                             | 電子管                                                      | 4.72E-2                                                                      | 3.51E-3                                               | 2.23E-2                                             | 2.14E-2                                                        | 9.58E+0                                     |
| JD246      | 342102      | Liquid crystal element                                     | 液晶素子                                                     | 4.57E-2                                                                      | 4.68E-4                                               | 3.02E-2                                             | 1.50E-2                                                        | 4.64E+0                                     |
| JD247      | 342103      | Magnetic tapes and discs                                   | 磁気テープ・磁気ディスク                                             | 5.97E-2                                                                      | 6.28E-3                                               | 3.34E-2                                             | 2.00E-2                                                        | 5.56E+0                                     |
| JD248      | 342109      | Other electronic components                                | その他の電子部品                                                 | 3.23E-2                                                                      | 6.83E-4                                               | 1.74E-2                                             | 1.42E-2                                                        | 5.53E+0                                     |
| JD249      | 351101      | Passenger motor cars                                       | 乗用車                                                      | 3.85E-2                                                                      | 5.30E-4                                               | 2.20E-2                                             | 1.59E-2                                                        | 5.68E+0                                     |
| JD250      | 352101      | Trucks, buses and other cars                               | トラック・バス・その他の自動車                                          | 4.04E-2                                                                      | 1.17E-3                                               | 2.13E-2                                             | 1.79E-2                                                        | 5.90E+0                                     |
| JD251      | 353101      | Two-wheel motor vehicles                                   | 二輪自動車                                                    | 3.55E-2                                                                      | 6.17E-4                                               | 1.82E-2                                             | 1.67E-2                                                        | 6.78E+0                                     |
| JD252      | 354101      | Motor vehicle bodies                                       | 自動車車体                                                    | 3.87E-2                                                                      | 1.82E-3                                               | 2.26E-2                                             | 1.43E-2                                                        | 4.98E+0                                     |
| JD253      | 354102      | Internal combustion engines for motor vehicles and parts   | 自動車用内燃機関・同部分品                                            | 3.57E-2                                                                      | 2.22E-3                                               | 1.78E-2                                             | 1.57E-2                                                        | 5.22E+0                                     |
| JD254      | 354103      | Motor vehicle parts and accessories                        | 自動車部品                                                    | 3.68E-2                                                                      | 1.37E-3                                               | 1.97E-2                                             | 1.57E-2                                                        | 5.88E+0                                     |
| JD255      | 361101      | Steel ships                                                | 鋼船                                                       | 4.05E-2                                                                      | 5.70E-4                                               | 2.65E-2                                             | 1.34E-2                                                        | 3.91E+0                                     |
| JD256      | 361102      | Ships (except steel ships)                                 | その他の船舶                                                   | 3.33E-2                                                                      | 4.39E-4                                               | 1.87E-2                                             | 1.41E-2                                                        | 5.58E+0                                     |
| JD257      | 361103      | Internal combustion engines for vessels                    | 船用内燃機関                                                   | 4.05E-2                                                                      | 5.67E-3                                               | 2.14E-2                                             | 1.35E-2                                                        | 4.64E+0                                     |
| JD258      | 361110      | Repair of ships                                            | 船舶修理                                                     | 3.18E-2                                                                      | 2.31E-4                                               | 2.02E-2                                             | 1.13E-2                                                        | 4.68E+0                                     |
| JD259      | 362101      | Rolling stock                                              | 鉄道車両                                                     | 4.71E-2                                                                      | 8.63E-4                                               | 3.27E-2                                             | 1.36E-2                                                        | 3.36E+0                                     |
| JD260      | 362110      | Repair of rolling stock                                    | 鉄道車両修理                                                   | 5.88E-2                                                                      | 7.20E-3                                               | 3.36E-2                                             | 1.80E-2                                                        | 3.89E+0                                     |
| JD261      | 362201      | Aircrafts                                                  | 航空機                                                      | 3.31E-2                                                                      | 2.68E-3                                               | 1.17E-2                                             | 1.87E-2                                                        | 8.79E+0                                     |
| JD262      | 362210      | Repair of aircrafts                                        | 航空機修理                                                    | 4.19E-2                                                                      | 1.18E-3                                               | 5.99E-3                                             | 3.47E-2                                                        | 1.75E+1                                     |
| JD263      | 362901      | Bicycles                                                   | 自転車                                                      | 3.75E-2                                                                      | 6.54E-3                                               | 1.79E-2                                             | 1.31E-2                                                        | 4.80E+0                                     |
| JD264      | 362909      | Other transport equipment                                  | その他の輸送機械                                                 | 3.36E-2                                                                      | 1.46E-3                                               | 1.92E-2                                             | 1.29E-2                                                        | 4.82E+0                                     |
| JD265      | 371101      | Camera                                                     | カメラ                                                      | 2.72E-2                                                                      | 5.34E-4                                               | 1.47E-2                                             | 1.19E-2                                                        | 5.92E+0                                     |
| JD266      | 371109      | Other photographic and optical instruments                 | その他の光学機械                                                 | 3.18E-2                                                                      | 7.43E-4                                               | 1.65E-2                                             | 1.46E-2                                                        | 7.38E+0                                     |

Table A5: Embodied global N<sub>2</sub>O intensities of Japanese goods and services based on producer price in 2005 [4/5]

| Sector no. | Sector code | Sector name<br>[Japanese domestic commodity]                      | Sector name in Japanese<br>[Japanese domestic commodity] | Embodied global N <sub>2</sub> O intensities based on producer price in 2005 |                                                       |                                                     |                                                                |                                             |
|------------|-------------|-------------------------------------------------------------------|----------------------------------------------------------|------------------------------------------------------------------------------|-------------------------------------------------------|-----------------------------------------------------|----------------------------------------------------------------|---------------------------------------------|
|            |             |                                                                   |                                                          | Total                                                                        | (D) Direct emissions<br>in Japan during<br>production | (S) Induced<br>emissions in Japan<br>through supply | (F) Induced emissions<br>in foreign country's<br>supply chains | Coefficient of variance<br>of the intensity |
|            |             |                                                                   |                                                          | tCO <sub>2</sub> eq/M-JPY                                                    | tCO <sub>2</sub> eq/M-JPY                             | tCO <sub>2</sub> eq/M-JPY                           | tCO <sub>2</sub> eq/M-JPY                                      | %                                           |
| JD267      | 371201      | Watches and clocks                                                | 時計                                                       | 2.61E-2                                                                      | 7.99E-4                                               | 1.37E-2                                             | 1.16E-2                                                        | 6.23E+0                                     |
| JD268      | 371901      | Professional and scientific instruments                           | 理化学機械器具                                                  | 2.56E-2                                                                      | 8.63E-4                                               | 1.50E-2                                             | 9.77E-3                                                        | 4.72E+0                                     |
| JD269      | 371902      | Analytical instruments, testing<br>machine, measuring instruments | 分析器・試験機・計量器・測定器                                          | 2.39E-2                                                                      | 4.23E-4                                               | 1.33E-2                                             | 1.02E-2                                                        | 5.24E+0                                     |
| JD270      | 371903      | Medical instruments                                               | 医療用機械器具                                                  | 3.17E-2                                                                      | 9.36E-4                                               | 1.70E-2                                             | 1.38E-2                                                        | 5.62E+0                                     |
| JD271      | 391101      | Toys and games                                                    | がん具                                                      | 3.16E-2                                                                      | 8.88E-4                                               | 1.68E-2                                             | 1.39E-2                                                        | 5.87E+0                                     |
| JD272      | 391102      | Sporting and athletic goods                                       | 運動用品                                                     | 7.39E-2                                                                      | 8.57E-4                                               | 3.29E-2                                             | 4.02E-2                                                        | 6.51E+0                                     |
| JD273      | 391901      | Musical instruments                                               | 楽器                                                       | 3.18E-2                                                                      | 2.87E-4                                               | 1.59E-2                                             | 1.56E-2                                                        | 5.04E+0                                     |
| JD274      | 391902      | Audio and video records, other<br>information recording media     | 情報記録物                                                    | 3.49E-2                                                                      | 2.41E-4                                               | 1.98E-2                                             | 1.49E-2                                                        | 6.52E+0                                     |
| JD275      | 391903      | Stationery                                                        | 筆記具・文具                                                   | 4.33E-2                                                                      | 4.81E-4                                               | 2.19E-2                                             | 2.10E-2                                                        | 6.40E+0                                     |
| JD276      | 391904      | Jewelry and adornments                                            | 身辺細貨品                                                    | 4.86E-2                                                                      | 3.89E-4                                               | 1.53E-2                                             | 3.29E-2                                                        | 1.42E+1                                     |
| JD277      | 391905      | "Tatami" (straw matting) and straw<br>products                    | 畳・わら加工品                                                  | 4.07E-1                                                                      | 2.60E-4                                               | 2.24E-1                                             | 1.83E-1                                                        | 7.80E+0                                     |
| JD278      | 391906      | Ordnance                                                          | 武器                                                       | 4.55E-2                                                                      | 2.79E-4                                               | 2.51E-2                                             | 2.01E-2                                                        | 5.56E+0                                     |
| JD279      | 391909      | Miscellaneous manufacturing products                              | その他の製造工業製品                                               | 4.54E-2                                                                      | 2.76E-4                                               | 2.63E-2                                             | 1.88E-2                                                        | 5.41E+0                                     |
| JD280      | 392101      | Reuse and recycling                                               | 再生资源回収・加工処理                                              | 3.87E-2                                                                      | 2.36E-3                                               | 2.30E-2                                             | 1.34E-2                                                        | 5.95E+0                                     |
| JD281      | 411101      | Residential construction (wooden)                                 | 住宅建築(木造)                                                 | 3.54E-2                                                                      | 3.93E-4                                               | 1.75E-2                                             | 1.76E-2                                                        | 4.46E+0                                     |
| JD282      | 411102      | Residential construction (non-wooden)                             | 住宅建築(非木造)                                                | 3.82E-2                                                                      | 9.09E-4                                               | 2.37E-2                                             | 1.36E-2                                                        | 4.07E+0                                     |
| JD283      | 411201      | Non-residential construction (wooden)                             | 非住宅建築(木造)                                                | 3.43E-2                                                                      | 4.49E-4                                               | 1.86E-2                                             | 1.53E-2                                                        | 4.51E+0                                     |
| JD284      | 411202      | Non-residential construction (non-<br>wooden)                     | 非住宅建築(非木造)                                               | 3.69E-2                                                                      | 9.37E-4                                               | 2.27E-2                                             | 1.32E-2                                                        | 4.35E+0                                     |
| JD285      | 412101      | Repair of construction                                            | 建設補修                                                     | 3.81E-2                                                                      | 1.29E-3                                               | 2.39E-2                                             | 1.29E-2                                                        | 3.93E+0                                     |
| JD286      | 413101      | Public construction of roads                                      | 道路関係公共事業                                                 | 5.44E-2                                                                      | 3.19E-3                                               | 3.57E-2                                             | 1.56E-2                                                        | 4.21E+0                                     |
| JD287      | 413102      | Public construction of rivers, drainages<br>and others            | 河川・下水道・その他の公共事業                                          | 5.34E-2                                                                      | 2.34E-3                                               | 3.82E-2                                             | 1.29E-2                                                        | 3.38E+0                                     |
| JD288      | 413103      | Agricultural public construction                                  | 農林関係公共事業                                                 | 6.29E-2                                                                      | 3.67E-3                                               | 4.38E-2                                             | 1.54E-2                                                        | 3.61E+0                                     |
| JD289      | 413201      | Railway construction                                              | 鉄道軌道建設                                                   | 4.89E-2                                                                      | 1.50E-3                                               | 3.54E-2                                             | 1.20E-2                                                        | 3.14E+0                                     |
| JD290      | 413202      | Electric power facilities construction                            | 電力施設建設                                                   | 3.78E-2                                                                      | 1.16E-3                                               | 2.54E-2                                             | 1.12E-2                                                        | 3.85E+0                                     |
| JD291      | 413203      | Telecommunication facilities<br>construction                      | 電気通信施設建設                                                 | 4.08E-2                                                                      | 1.89E-3                                               | 2.73E-2                                             | 1.17E-2                                                        | 3.84E+0                                     |
| JD292      | 413209      | Other civil engineering and construction                          | その他の土木建設                                                 | 4.74E-2                                                                      | 1.77E-3                                               | 3.28E-2                                             | 1.28E-2                                                        | 3.63E+0                                     |
| JD293      | 5111001     | Electricity                                                       | 事業用電力                                                    | 1.76E-1                                                                      | 1.30E-1                                               | 1.67E-2                                             | 3.00E-2                                                        | 3.04E+0                                     |
| JD294      | 511104      | On-site power generation                                          | 自家発電                                                     | 4.13E-1                                                                      | 3.57E-1                                               | 1.60E-2                                             | 4.03E-2                                                        | 1.82E+0                                     |
| JD295      | 512101      | Gas supply                                                        | 都市ガス                                                     | 3.98E-2                                                                      | 3.66E-5                                               | 1.25E-2                                             | 2.73E-2                                                        | 2.19E+1                                     |
| JD296      | 512201      | Steam and hot water supply                                        | 熱供給業                                                     | 1.02E-1                                                                      | 5.18E-2                                               | 3.03E-2                                             | 2.03E-2                                                        | 3.92E+0                                     |
| JD297      | 521101      | Water supply                                                      | 上水道・簡易水道                                                 | 1.88E-2                                                                      | 1.34E-4                                               | 1.38E-2                                             | 4.81E-3                                                        | 3.60E+0                                     |
| JD298      | 521102      | Industrial water supply                                           | 工業用水                                                     | 1.26E-2                                                                      | 1.09E-4                                               | 8.65E-3                                             | 3.79E-3                                                        | 4.45E+0                                     |
| JD299      | 521103      | Sewage disposal **                                                | 下水道★★                                                    | 9.44E-1                                                                      | 8.76E-1                                               | 4.06E-2                                             | 2.75E-2                                                        | 4.59E-1                                     |
| JD300      | 521201      | Waste management services (public) **                             | 廃棄物処理(公営)★★                                              | 2.90E-1                                                                      | 2.52E-1                                               | 2.55E-2                                             | 1.25E-2                                                        | 6.57E-1                                     |
| JD301      | 521202      | Waste management services (private)                               | 廃棄物処理(産業)                                                | 8.73E-1                                                                      | 8.48E-1                                               | 1.70E-2                                             | 8.25E-3                                                        | 1.41E-1                                     |
| JD302      | 611101      | Wholesale trade                                                   | 卸売                                                       | 1.55E-2                                                                      | 1.34E-4                                               | 9.02E-3                                             | 6.31E-3                                                        | 5.83E+0                                     |
| JD303      | 611201      | Retail trade                                                      | 小売                                                       | 2.47E-2                                                                      | 5.68E-4                                               | 1.64E-2                                             | 7.77E-3                                                        | 4.66E+0                                     |
| JD304      | 621101      | Financial service                                                 | 金融                                                       | 9.79E-3                                                                      | 3.13E-5                                               | 5.93E-3                                             | 3.83E-3                                                        | 6.49E+0                                     |
| JD305      | 621201      | Life insurance                                                    | 生命保険                                                     | 1.35E-2                                                                      | 6.44E-5                                               | 9.13E-3                                             | 4.33E-3                                                        | 4.33E+0                                     |
| JD306      | 621202      | Non-life insurance                                                | 損害保険                                                     | 9.17E-3                                                                      | 6.29E-5                                               | 5.99E-3                                             | 3.12E-3                                                        | 4.57E+0                                     |
| JD307      | 641101      | Real estate agencies and managers                                 | 不動産仲介・管理業                                                | 1.10E-2                                                                      | 1.14E-4                                               | 7.06E-3                                             | 3.80E-3                                                        | 4.72E+0                                     |
| JD308      | 641102      | Real estate rental service                                        | 不動産賃貸業                                                   | 8.91E-3                                                                      | 2.37E-4                                               | 5.85E-3                                             | 2.83E-3                                                        | 4.85E+0                                     |
| JD309      | 642101      | House rent                                                        | 住宅賃貸料                                                    | 6.22E-3                                                                      | 1.02E-4                                               | 3.63E-3                                             | 2.49E-3                                                        | 5.24E+0                                     |
| JD310      | 642201      | House rent (imputed house rent)                                   | 住宅賃貸料(帰属家賃)                                              | 2.78E-3                                                                      | 0.00E+0                                               | 1.79E-3                                             | 9.88E-4                                                        | 4.34E+0                                     |
| JD311      | 711101      | Railway transport (passengers)                                    | 鉄道旅客輸送                                                   | 4.46E-2                                                                      | 1.18E-2                                               | 2.57E-2                                             | 7.16E-3                                                        | 2.15E+0                                     |
| JD312      | 711201      | Railway transport (freight)                                       | 鉄道貨物輸送                                                   | 1.07E-1                                                                      | 5.40E-2                                               | 4.13E-2                                             | 1.19E-2                                                        | 1.73E+0                                     |
| JD313      | 712101      | Bus transport service                                             | バス                                                       | 4.57E-2                                                                      | 1.91E-2                                               | 6.26E-3                                             | 2.03E-2                                                        | 7.33E+0                                     |
| JD314      | 712102      | Hired car and taxi transport                                      | ハイヤー・タクシー                                                | 4.19E-2                                                                      | 2.57E-2                                               | 4.10E-3                                             | 1.21E-2                                                        | 7.91E+0                                     |
| JD315      | 712201      | Road freight transport(except Self-<br>transport by private cars) | 道路貨物輸送(除自家輸送)                                            | 5.53E-2                                                                      | 2.39E-2                                               | 8.06E-3                                             | 2.33E-2                                                        | 7.36E+0                                     |
| JD316      | 713101      | Self-transport by private cars<br>(passengers)                    | 自家輸送(旅客自動車)                                              | 2.19E-1                                                                      | 1.13E-1                                               | 1.46E-2                                             | 9.16E-2                                                        | 7.40E+0                                     |
| JD317      | 713201      | Self-transport by private cars (freight)                          | 自家輸送(貨物自動車)                                              | 1.83E-1                                                                      | 8.75E-2                                               | 1.44E-2                                             | 8.07E-2                                                        | 7.67E+0                                     |
| JD318      | 714101      | Ocean transport                                                   | 外洋輸送                                                     | 2.97E-1                                                                      | 6.13E-2                                               | 4.51E-3                                             | 2.31E-1                                                        | 2.52E+1                                     |
| JD319      | 714201      | Coastal and inland water transport                                | 沿海・内水面輸送                                                 | 1.54E-1                                                                      | 1.02E-1                                               | 1.29E-2                                             | 3.84E-2                                                        | 4.32E+0                                     |
| JD320      | 714301      | Harbor transport service                                          | 港湾運送                                                     | 2.09E-2                                                                      | 8.26E-3                                               | 5.64E-3                                             | 7.03E-3                                                        | 5.26E+0                                     |
| JD321      | 715101      | Air transport                                                     | 航空輸送                                                     | 1.57E-1                                                                      | 1.11E-1                                               | 8.97E-3                                             | 3.69E-2                                                        | 4.35E+0                                     |
| JD322      | 716101      | Consigned freight forwarding                                      | 貨物利用運送                                                   | 1.69E-2                                                                      | 8.18E-4                                               | 7.93E-3                                             | 8.18E-3                                                        | 7.29E+0                                     |
| JD323      | 717101      | Storage facility service                                          | 倉庫                                                       | 2.10E-2                                                                      | 1.07E-4                                               | 1.57E-2                                             | 5.22E-3                                                        | 3.52E+0                                     |
| JD324      | 718101      | Packing service                                                   | こん包                                                      | 3.07E-2                                                                      | 1.24E-4                                               | 1.77E-2                                             | 1.28E-2                                                        | 4.61E+0                                     |
| JD325      | 718901      | Facility service for road transport                               | 道路輸送施設提供                                                 | 1.69E-2                                                                      | 1.22E-4                                               | 1.28E-2                                             | 3.94E-3                                                        | 3.21E+0                                     |
| JD326      | 718902      | Port and water traffic control **                                 | 水運施設管理★★                                                 | 2.76E-2                                                                      | 9.71E-4                                               | 1.98E-2                                             | 6.82E-3                                                        | 3.57E+0                                     |
| JD327      | 718903      | Services relating to water transport                              | その他の水運付帯サービス                                             | 2.15E-2                                                                      | 2.25E-4                                               | 1.86E-2                                             | 2.71E-3                                                        | 1.80E+0                                     |
| JD328      | 718904      | Airport and air traffic control (public) **                       | 航空施設管理(国営)★★                                             | 2.30E-2                                                                      | 1.48E-4                                               | 1.57E-2                                             | 7.14E-3                                                        | 4.15E+0                                     |
| JD329      | 718905      | Airport and air traffic control                                   | 航空施設管理(産業)                                               | 2.60E-2                                                                      | 7.30E-4                                               | 1.81E-2                                             | 7.22E-3                                                        | 3.93E+0                                     |
| JD330      | 718906      | Services relating to air transport                                | その他の航空付帯サービス                                             | 3.19E-2                                                                      | 2.55E-4                                               | 1.88E-2                                             | 1.28E-2                                                        | 5.71E+0                                     |
| JD331      | 718909      | Travel agency and other services<br>relating to transport         | 旅行・その他の運輸付帯サービス                                          | 1.19E-2                                                                      | 8.27E-5                                               | 6.78E-3                                             | 4.99E-3                                                        | 5.43E+0                                     |
| JD332      | 731101      | Postal service*                                                   | 郵便・信書便                                                   | 1.41E-2                                                                      | 2.31E-4                                               | 7.85E-3                                             | 6.06E-3                                                        | 6.85E+0                                     |
| JD333      | 731201      | Fixed telecommunication                                           | 固定電気通信                                                   | 1.55E-2                                                                      | 8.78E-5                                               | 1.02E-2                                             | 5.14E-3                                                        | 4.28E+0                                     |
| JD334      | 731202      | Mobile telecommunication                                          | 移動電気通信                                                   | 1.49E-2                                                                      | 9.49E-5                                               | 1.12E-2                                             | 3.63E-3                                                        | 3.11E+0                                     |
| JD335      | 731203      | Other telecommunication                                           | その他の電気通信                                                 | 1.79E-2                                                                      | 9.43E-5                                               | 1.14E-2                                             | 6.39E-3                                                        | 4.63E+0                                     |
| JD336      | 731909      | Other services relating to<br>communication                       | その他の通信サービス                                               | 1.47E-2                                                                      | 2.19E-4                                               | 9.62E-3                                             | 4.90E-3                                                        | 4.37E+0                                     |
| JD337      | 732101      | Public broadcasting                                               | 公共放送                                                     | 3.52E-2                                                                      | 8.54E-5                                               | 2.60E-2                                             | 9.20E-3                                                        | 3.48E+0                                     |
| JD338      | 732102      | Private broadcasting                                              | 民間放送                                                     | 2.61E-2                                                                      | 1.65E-4                                               | 1.31E-2                                             | 1.28E-2                                                        | 6.58E+0                                     |
| JD339      | 732103      | Cable broadcasting                                                | 有線放送                                                     | 1.51E-2                                                                      | 1.27E-4                                               | 8.61E-3                                             | 6.40E-3                                                        | 5.31E+0                                     |
| JD340      | 733101      | Information services                                              | 情報サービス                                                   | 1.22E-2                                                                      | 4.61E-5                                               | 7.08E-3                                             | 5.10E-3                                                        | 5.68E+0                                     |
| JD341      | 734101      | Internet based services                                           | インターネット附随サービス                                            | 1.70E-2                                                                      | 6.16E-5                                               | 1.07E-2                                             | 6.27E-3                                                        | 4.78E+0                                     |
| JD342      | 735101      | Image information production and<br>distribution industry         | 映像情報制作・配給業                                               | 4.00E-2                                                                      | 2.63E-4                                               | 1.39E-2                                             | 2.58E-2                                                        | 1.10E+1                                     |
| JD343      | 735102      | Newspaper                                                         | 新聞                                                       | 4.32E-2                                                                      | 3.38E-5                                               | 2.89E-2                                             | 1.43E-2                                                        | 4.58E+0                                     |
| JD344      | 735103      | Publication                                                       | 出版                                                       | 3.62E-2                                                                      | 3.17E-5                                               | 2.48E-2                                             | 1.14E-2                                                        | 4.26E+0                                     |
| JD345      | 735104      | News syndicates and private detective<br>agencies                 | ニュース供給・興信所                                               | 1.32E-2                                                                      | 1.32E-5                                               | 7.55E-3                                             | 5.63E-3                                                        | 6.20E+0                                     |
| JD346      | 811101      | Public administration (central) **                                | 公務(中央)★★                                                 | 2.26E-2                                                                      | 3.59E-4                                               | 1.05E-2                                             | 1.17E-2                                                        | 7.03E+0                                     |
| JD347      | 811201      | Public administration (local) **                                  | 公務(地方)★★                                                 | 3.36E-2                                                                      | 4.95E-4                                               | 2.81E-2                                             | 5.08E-3                                                        | 2.30E+0                                     |
| JD348      | 821101      | School education (public) **                                      | 学校教育(国公立)★★                                              | 1.06E-2                                                                      | 1.87E-4                                               | 8.31E-3                                             | 2.08E-3                                                        | 3.05E+0                                     |
| JD349      | 821102      | School education (private) *                                      | 学校教育(私立)★                                                | 1.82E-2                                                                      | 3.63E-4                                               | 1.27E-2                                             | 5.16E-3                                                        | 4.02E+0                                     |
| JD350      | 821301      | Social education (public) **                                      | 社会教育(国公立)★★                                              | 3.96E-2                                                                      | 4.10E-4                                               | 2.04E-2                                             | 1.88E-2                                                        | 7.37E+0                                     |
| JD351      | 821302      | Social education (private, non-profit) *                          | 社会教育(非営利)★                                               | 5.64E-2                                                                      | 3.11E-4                                               | 2.49E-2                                             | 3.12E-2                                                        | 8.88E+0                                     |
| JD352      | 821303      | Other educational and training<br>institutions (public) **        | その他の教育訓練機関(国公立)★                                         | 5.56E-2                                                                      | 3.20E-3                                               | 3.46E-2                                             | 1.78E-2                                                        | 5.18E+0                                     |

Table A5: Embodied global N<sub>2</sub>O intensities of Japanese goods and services based on producer price in 2005 [5/5]

| Sector no. | Sector code | Sector name<br>[Japanese domestic commodity]                                                | Sector name in Japanese<br>[Japanese domestic commodity] | Embodied global N <sub>2</sub> O intensities based on producer price in 2005 |                                                       |                                                     |                                                                |                                             |
|------------|-------------|---------------------------------------------------------------------------------------------|----------------------------------------------------------|------------------------------------------------------------------------------|-------------------------------------------------------|-----------------------------------------------------|----------------------------------------------------------------|---------------------------------------------|
|            |             |                                                                                             |                                                          | Total                                                                        | (D) Direct emissions<br>in Japan during<br>production | (S) Induced<br>emissions in Japan<br>through supply | (F) Induced emissions<br>in foreign country's<br>supply chains | Coefficient of variance<br>of the intensity |
|            |             |                                                                                             |                                                          | tCO <sub>2</sub> eq/M-JPY                                                    | tCO <sub>2</sub> eq/M-JPY                             | tCO <sub>2</sub> eq/M-JPY                           | tCO <sub>2</sub> eq/M-JPY                                      | %                                           |
| JD353      | 821304      | Other educational and training institutions (profit-making)                                 | その他の教育訓練機関(産業)                                           | 2.22E-2                                                                      | 2.24E-3                                               | 7.65E-3                                             | 1.23E-2                                                        | 9.12E+0                                     |
| JD354      | 822101      | Research institutes for natural science (public) **                                         | 自然科学研究機関(国公立)★★                                          | 5.00E-2                                                                      | 1.19E-3                                               | 2.10E-2                                             | 2.78E-2                                                        | 6.60E+0                                     |
| JD355      | 822102      | Research institutes for cultural and social science (public) **                             | 人文科学研究機関(国公立)★★                                          | 3.07E-2                                                                      | 1.50E-3                                               | 1.48E-2                                             | 1.43E-2                                                        | 7.04E+0                                     |
| JD356      | 822103      | Research institutes for natural sciences (private, non-profit) *                            | 自然科学研究機関(非営利)★                                           | 5.28E-2                                                                      | 8.44E-4                                               | 2.24E-2                                             | 2.95E-2                                                        | 6.59E+0                                     |
| JD357      | 822104      | Research institutes for cultural and social science (private, non-profit) *                 | 人文科学研究機関(非営利)★                                           | 2.51E-2                                                                      | 4.06E-4                                               | 1.76E-2                                             | 7.14E-3                                                        | 3.94E+0                                     |
| JD358      | 822105      | Research institutes for natural sciences (profit-making)                                    | 自然科学研究機関(産業)                                             | 6.06E-2                                                                      | 2.83E-3                                               | 2.32E-2                                             | 3.46E-2                                                        | 7.68E+0                                     |
| JD359      | 822106      | Research institutes for cultural and social science (profit-making)                         | 人文科学研究機関(産業)                                             | 1.52E-2                                                                      | 4.26E-4                                               | 8.75E-3                                             | 6.01E-3                                                        | 5.49E+0                                     |
| JD360      | 822201      | Research and development (intra-enterprise)                                                 | 企業内研究開発                                                  | 3.57E-2                                                                      | 6.38E-4                                               | 1.86E-2                                             | 1.64E-2                                                        | 6.39E+0                                     |
| JD361      | 831101      | Medical service (public)                                                                    | 医療(国公立)                                                  | 5.66E-2                                                                      | 7.31E-3                                               | 2.47E-2                                             | 2.45E-2                                                        | 6.95E+0                                     |
| JD362      | 831102      | Medical service (non-profit foundations, etc.)                                              | 医療(公益法人等)                                                | 4.89E-2                                                                      | 7.19E-3                                               | 2.03E-2                                             | 2.14E-2                                                        | 7.27E+0                                     |
| JD363      | 831103      | Medical service (medical corporations, etc.)                                                | 医療(医療法人等)                                                | 5.02E-2                                                                      | 8.01E-3                                               | 2.01E-2                                             | 2.21E-2                                                        | 7.69E+0                                     |
| JD364      | 831201      | Health and hygiene (public) **                                                              | 保健衛生(国公立)★★                                              | 3.17E-2                                                                      | 5.85E-4                                               | 2.40E-2                                             | 7.07E-3                                                        | 3.25E+0                                     |
| JD365      | 831202      | Health and hygiene (profit-making)                                                          | 保健衛生(産業)                                                 | 4.59E-2                                                                      | 4.41E-4                                               | 3.62E-2                                             | 9.21E-3                                                        | 2.89E+0                                     |
| JD366      | 831301      | Social insurance (public) **                                                                | 社会保険事業(国公立)★★                                            | 1.82E-2                                                                      | 2.62E-4                                               | 1.36E-2                                             | 4.38E-3                                                        | 3.32E+0                                     |
| JD367      | 831302      | Social insurance (private, non-profit) *                                                    | 社会保険事業(非営利)★                                             | 2.06E-2                                                                      | 3.58E-4                                               | 1.56E-2                                             | 4.71E-3                                                        | 3.26E+0                                     |
| JD368      | 831303      | Social welfare (public) **                                                                  | 社会福祉(国公立)★★                                              | 5.51E-2                                                                      | 3.73E-4                                               | 2.83E-2                                             | 2.65E-2                                                        | 7.09E+0                                     |
| JD369      | 831304      | Social welfare (private, non-profit) *                                                      | 社会福祉(非営利)★                                               | 5.58E-2                                                                      | 2.83E-4                                               | 2.91E-2                                             | 2.64E-2                                                        | 7.01E+0                                     |
| JD370      | 831305      | Social welfare (profit-making)                                                              | 社会福祉(産業)                                                 | 5.42E-2                                                                      | 4.58E-4                                               | 2.80E-2                                             | 2.57E-2                                                        | 6.81E+0                                     |
| JD371      | 831401      | Nursing care (In-home)                                                                      | 介護(居宅)                                                   | 5.64E-2                                                                      | 2.65E-4                                               | 3.06E-2                                             | 2.56E-2                                                        | 6.88E+0                                     |
| JD372      | 831402      | Nursing care (In-facility)                                                                  | 介護(施設)                                                   | 6.97E-2                                                                      | 4.29E-4                                               | 3.65E-2                                             | 3.28E-2                                                        | 7.18E+0                                     |
| JD373      | 841101      | Private non-profit institutions serving enterprises                                         | 対企業民間非営利団体                                               | 2.11E-2                                                                      | 6.12E-4                                               | 1.09E-2                                             | 9.59E-3                                                        | 6.06E+0                                     |
| JD374      | 841102      | Private non-profit institutions serving households, n.e.c. *                                | 対家計民間非営利団体(除別掲)★                                         | 1.64E-2                                                                      | 3.62E-4                                               | 9.07E-3                                             | 6.95E-3                                                        | 5.42E+0                                     |
| JD375      | 851101      | Advertising services                                                                        | 広告                                                       | 2.49E-2                                                                      | 1.43E-4                                               | 1.42E-2                                             | 1.06E-2                                                        | 5.52E+0                                     |
| JD376      | 851201      | Goods rental and leasing (except car rental)                                                | 物品賃貸業(除貸自動車)                                             | 9.93E-3                                                                      | 4.67E-5                                               | 5.19E-3                                             | 4.70E-3                                                        | 5.93E+0                                     |
| JD377      | 851301      | Car rental and leasing                                                                      | 貸自動車業                                                    | 1.23E-2                                                                      | 4.04E-4                                               | 5.63E-3                                             | 6.28E-3                                                        | 6.92E+0                                     |
| JD378      | 851410      | Repair of motor vehicles                                                                    | 自動車修理                                                    | 3.38E-2                                                                      | 8.99E-5                                               | 1.68E-2                                             | 1.69E-2                                                        | 6.67E+0                                     |
| JD379      | 851510      | Repair of machine                                                                           | 機械修理                                                     | 2.49E-2                                                                      | 5.61E-5                                               | 1.40E-2                                             | 1.08E-2                                                        | 5.56E+0                                     |
| JD380      | 851901      | Building maintenance services                                                               | 建物サービス                                                   | 1.23E-2                                                                      | 1.56E-4                                               | 7.14E-3                                             | 4.99E-3                                                        | 5.61E+0                                     |
| JD381      | 851902      | Judicial, financial and accounting services                                                 | 法務・財務・会計サービス                                             | 7.47E-3                                                                      | 2.10E-4                                               | 4.00E-3                                             | 3.26E-3                                                        | 6.08E+0                                     |
| JD382      | 851903      | Civil engineering and construction services                                                 | 土木建築サービス                                                 | 1.37E-2                                                                      | 3.44E-4                                               | 7.71E-3                                             | 5.68E-3                                                        | 5.54E+0                                     |
| JD383      | 851904      | Worker dispatching services                                                                 | 労働者派遣サービス                                                | 1.65E-3                                                                      | 2.65E-5                                               | 9.51E-4                                             | 6.76E-4                                                        | 5.39E+0                                     |
| JD384      | 851909      | Other business services                                                                     | その他の対事業所サービス                                             | 8.48E-3                                                                      | 5.68E-5                                               | 4.76E-3                                             | 3.66E-3                                                        | 5.85E+0                                     |
| JD385      | 861101      | Movie theaters                                                                              | 映画館                                                      | 4.50E-2                                                                      | 8.08E-4                                               | 2.43E-2                                             | 1.99E-2                                                        | 7.11E+0                                     |
| JD386      | 861102      | Performances (except otherwise classified), theatrical companies                            | 興行場(除別掲)・興行団                                             | 7.35E-2                                                                      | 1.00E-4                                               | 3.38E-2                                             | 3.96E-2                                                        | 8.82E+0                                     |
| JD387      | 861103      | Amusement and recreation facilities                                                         | 遊戯場                                                      | 3.11E-2                                                                      | 8.49E-4                                               | 2.11E-2                                             | 9.17E-3                                                        | 4.51E+0                                     |
| JD388      | 861104      | Stadiums and companies of bicycle, horse, motorcar and motorboat races                      | 競輪・競馬等の競走場・競技団                                           | 1.09E-1                                                                      | 3.11E-4                                               | 4.91E-2                                             | 5.91E-2                                                        | 1.00E+1                                     |
| JD389      | 861105      | Sport facility service, public gardens and amusement parks                                  | スポーツ施設提供業・公園・遊園地                                         | 3.47E-2                                                                      | 4.41E-4                                               | 2.01E-2                                             | 1.42E-2                                                        | 5.71E+0                                     |
| JD390      | 861109      | Other amusement and recreation services                                                     | その他の娯楽                                                   | 3.63E-2                                                                      | 4.00E-4                                               | 2.60E-2                                             | 9.96E-3                                                        | 3.93E+0                                     |
| JD391      | 861201      | General eating and drinking places (except coffee shops)                                    | 一般飲食店(除喫茶店)                                              | 2.98E-1                                                                      | 5.84E-4                                               | 1.16E-1                                             | 1.82E-1                                                        | 9.86E+0                                     |
| JD392      | 861202      | Coffee shops                                                                                | 喫茶店                                                      | 2.34E-1                                                                      | 8.71E-4                                               | 1.10E-1                                             | 1.23E-1                                                        | 8.37E+0                                     |
| JD393      | 861203      | Eating and drinking places for pleasures                                                    | 遊興飲食店                                                    | 1.76E-1                                                                      | 6.03E-4                                               | 6.73E-2                                             | 1.08E-1                                                        | 9.65E+0                                     |
| JD394      | 861301      | Hotels                                                                                      | 宿泊業                                                      | 1.77E-1                                                                      | 7.37E-4                                               | 9.09E-2                                             | 8.51E-2                                                        | 7.57E+0                                     |
| JD395      | 861401      | Cleaning                                                                                    | 洗濯業                                                      | 4.00E-2                                                                      | 1.15E-3                                               | 2.99E-2                                             | 8.90E-3                                                        | 3.44E+0                                     |
| JD396      | 861402      | Barber shops                                                                                | 理容業                                                      | 1.36E-2                                                                      | 9.43E-4                                               | 6.83E-3                                             | 5.87E-3                                                        | 6.74E+0                                     |
| JD397      | 861403      | Beauty shops                                                                                | 美容業                                                      | 1.69E-2                                                                      | 5.27E-4                                               | 1.08E-2                                             | 5.60E-3                                                        | 4.71E+0                                     |
| JD398      | 861404      | Public baths                                                                                | 浴場業                                                      | 4.92E-2                                                                      | 3.93E-3                                               | 3.04E-2                                             | 1.49E-2                                                        | 4.91E+0                                     |
| JD399      | 861409      | Other cleaning, barber shops, beauty shops and public baths                                 | その他の洗濯・理容・美容・浴場業                                         | 2.38E-2                                                                      | 7.69E-4                                               | 1.44E-2                                             | 8.65E-3                                                        | 5.15E+0                                     |
| JD400      | 861901      | Photographic studios                                                                        | 写真業                                                      | 2.90E-2                                                                      | 1.27E-4                                               | 1.82E-2                                             | 1.07E-2                                                        | 5.27E+0                                     |
| JD401      | 861902      | Ceremonial occasions                                                                        | 冠婚葬祭業                                                    | 6.24E-2                                                                      | 9.83E-4                                               | 3.43E-2                                             | 2.71E-2                                                        | 5.31E+0                                     |
| JD402      | 861903      | Miscellaneous repairs, n.e.c.                                                               | 各種修理業(除別掲)                                               | 4.93E-2                                                                      | 5.04E-4                                               | 3.88E-2                                             | 1.00E-2                                                        | 2.77E+0                                     |
| JD403      | 861904      | Supplementary tutorial schools, instruction services for arts, culture and technical skills | 個人教授業                                                    | 1.71E-2                                                                      | 2.07E-4                                               | 1.20E-2                                             | 4.95E-3                                                        | 4.02E+0                                     |
| JD404      | 861909      | Other personal services                                                                     | その他の対個人サービス                                              | 2.56E-2                                                                      | 3.44E-4                                               | 1.81E-2                                             | 7.12E-3                                                        | 3.98E+0                                     |
| JD405      | 890000      | Office supplies                                                                             | 事務用品                                                     | 5.80E-2                                                                      | 0.00E+0                                               | 3.81E-2                                             | 1.99E-2                                                        | 4.58E+0                                     |
| JD406      | 900000      | Activities not elsewhere classified                                                         | 分類不明                                                     | 4.95E-2                                                                      | 7.39E-4                                               | 3.20E-2                                             | 1.67E-2                                                        | 4.63E+0                                     |

Table A6: Embodied global PFCs intensities of Japanese goods and services based on producer price in 2005 [1/5]

| Sector no. | Sector code | Sector name<br>[Japanese domestic commodity]                                 | Sector name in Japanese<br>[Japanese domestic commodity] | Embodied global PFCs intensities based on producer price in 2005 |                                                       |                                                     |                                                                |                                             |
|------------|-------------|------------------------------------------------------------------------------|----------------------------------------------------------|------------------------------------------------------------------|-------------------------------------------------------|-----------------------------------------------------|----------------------------------------------------------------|---------------------------------------------|
|            |             |                                                                              |                                                          | Total                                                            | (D) Direct emissions<br>in Japan during<br>production | (S) Induced<br>emissions in Japan<br>through supply | (F) Induced emissions<br>in foreign country's<br>supply chains | Coefficient of variance<br>of the intensity |
|            |             |                                                                              |                                                          | tCO <sub>2</sub> eq/M-JPY                                        | tCO <sub>2</sub> eq/M-JPY                             | tCO <sub>2</sub> eq/M-JPY                           | tCO <sub>2</sub> eq/M-JPY                                      | %                                           |
| JD1        | 011101      | Rice                                                                         | 米                                                        | 1.40E-3                                                          | 0.00E+0                                               | 7.09E-4                                             | 6.87E-4                                                        | 8.58E+1                                     |
| JD2        | 011102      | Wheat, barley and the like                                                   | 麦類                                                       | 1.70E-3                                                          | 0.00E+0                                               | 8.28E-4                                             | 8.74E-4                                                        | 8.62E+1                                     |
| JD3        | 011201      | Potatoes and sweet potatoes                                                  | いも類                                                      | 1.20E-3                                                          | 0.00E+0                                               | 5.80E-4                                             | 6.23E-4                                                        | 8.94E+1                                     |
| JD4        | 011202      | Pulses                                                                       | 豆類                                                       | 1.73E-3                                                          | 0.00E+0                                               | 9.34E-4                                             | 7.98E-4                                                        | 8.05E+1                                     |
| JD5        | 011301      | Vegetables                                                                   | 野菜                                                       | 1.10E-3                                                          | 0.00E+0                                               | 4.36E-4                                             | 6.65E-4                                                        | 1.14E+2                                     |
| JD6        | 011401      | Fruits                                                                       | 果実                                                       | 9.40E-4                                                          | 0.00E+0                                               | 3.36E-4                                             | 6.04E-4                                                        | 1.14E+2                                     |
| JD7        | 011501      | Sugar crops                                                                  | 砂糖原料作物                                                   | 1.12E-3                                                          | 0.00E+0                                               | 4.76E-4                                             | 6.43E-4                                                        | 9.64E+1                                     |
| JD8        | 011502      | Crops for beverages                                                          | 飲料用作物                                                    | 1.26E-3                                                          | 0.00E+0                                               | 5.41E-4                                             | 7.14E-4                                                        | 9.11E+1                                     |
| JD9        | 011509      | Other edible crops                                                           | その他の食用耕種作物                                               | 1.49E-3                                                          | 0.00E+0                                               | 7.28E-4                                             | 7.64E-4                                                        | 9.02E+1                                     |
| JD10       | 011601      | Crops for feed and forage                                                    | 飼料作物                                                     | 1.77E-3                                                          | 0.00E+0                                               | 9.09E-4                                             | 8.61E-4                                                        | 8.36E+1                                     |
| JD11       | 011602      | Seeds and seedlings                                                          | 種苗                                                       | 1.06E-3                                                          | 0.00E+0                                               | 2.94E-4                                             | 7.61E-4                                                        | 1.76E+2                                     |
| JD12       | 011603      | Flowers and plants                                                           | 花き・花木類                                                   | 1.77E-3                                                          | 0.00E+0                                               | 5.39E-4                                             | 1.23E-3                                                        | 1.55E+2                                     |
| JD13       | 011609      | Other inedible crops                                                         | その他の非食用耕種作物                                              | 8.52E-4                                                          | 0.00E+0                                               | 4.13E-4                                             | 4.39E-4                                                        | 9.08E+1                                     |
| JD14       | 012101      | Dairy cattle farming                                                         | 酪農                                                       | 1.49E-3                                                          | 0.00E+0                                               | 6.44E-4                                             | 8.46E-4                                                        | 9.09E+1                                     |
| JD15       | 012102      | Hen eggs                                                                     | 鶏卵                                                       | 1.30E-3                                                          | 0.00E+0                                               | 5.01E-4                                             | 8.01E-4                                                        | 9.99E+1                                     |
| JD16       | 012103      | Fowls and broilers                                                           | 肉鶏                                                       | 1.58E-3                                                          | 0.00E+0                                               | 6.03E-4                                             | 9.74E-4                                                        | 1.01E+2                                     |
| JD17       | 012104      | Hogs                                                                         | 豚                                                        | 1.37E-3                                                          | 0.00E+0                                               | 5.34E-4                                             | 8.39E-4                                                        | 9.95E+1                                     |
| JD18       | 012105      | Beef cattle                                                                  | 肉用牛                                                      | 1.47E-3                                                          | 0.00E+0                                               | 5.71E-4                                             | 8.96E-4                                                        | 9.39E+1                                     |
| JD19       | 012109      | Other livestock                                                              | その他の畜産                                                   | 1.38E-3                                                          | 0.00E+0                                               | 5.69E-4                                             | 8.09E-4                                                        | 9.44E+1                                     |
| JD20       | 013101      | Veterinary service                                                           | 獣医薬                                                      | 2.17E-3                                                          | 0.00E+0                                               | 8.05E-4                                             | 1.37E-3                                                        | 1.29E+2                                     |
| JD21       | 013102      | Agricultural services (except veterinary service)                            | 農業サービス (除獣医薬)                                            | 1.82E-3                                                          | 0.00E+0                                               | 8.95E-4                                             | 9.23E-4                                                        | 8.95E+1                                     |
| JD22       | 021101      | Silviculture                                                                 | 育林                                                       | 5.35E-4                                                          | 0.00E+0                                               | 2.98E-4                                             | 2.37E-4                                                        | 8.02E+1                                     |
| JD23       | 021201      | Logs                                                                         | 素材                                                       | 1.55E-3                                                          | 0.00E+0                                               | 7.57E-4                                             | 7.90E-4                                                        | 9.35E+1                                     |
| JD24       | 021301      | Special forest products (inc. hunting)                                       | 特用林産物(含狩猟業)                                              | 2.00E-3                                                          | 0.00E+0                                               | 8.23E-4                                             | 1.18E-3                                                        | 1.13E+2                                     |
| JD25       | 031101      | Marine fisheries                                                             | 海面漁業                                                     | 2.07E-3                                                          | 0.00E+0                                               | 3.40E-4                                             | 1.73E-3                                                        | 1.54E+2                                     |
| JD26       | 031104      | Marine culture                                                               | 海面養殖業                                                    | 1.71E-3                                                          | 0.00E+0                                               | 4.87E-4                                             | 1.22E-3                                                        | 1.11E+2                                     |
| JD27       | 0312001     | Inland water fisheries and culture                                           | 内水面漁業・養殖業                                                | 1.31E-3                                                          | 0.00E+0                                               | 4.26E-4                                             | 8.86E-4                                                        | 1.33E+2                                     |
| JD28       | 061101      | Metallic ores                                                                | 金属鉱物                                                     | 2.23E-3                                                          | 0.00E+0                                               | 1.05E-3                                             | 1.18E-3                                                        | 9.62E+1                                     |
| JD29       | 062101      | Materials for ceramics                                                       | 窯業原料鉱物                                                   | 2.83E-3                                                          | 0.00E+0                                               | 1.40E-3                                             | 1.43E-3                                                        | 1.03E+2                                     |
| JD30       | 062201      | Gravel and quarrying                                                         | 砂利・採石                                                    | 3.54E-3                                                          | 0.00E+0                                               | 1.99E-3                                             | 1.56E-3                                                        | 9.56E+1                                     |
| JD31       | 062202      | Crushed stones                                                               | 砕石                                                       | 3.04E-3                                                          | 0.00E+0                                               | 1.67E-3                                             | 1.37E-3                                                        | 9.88E+1                                     |
| JD32       | 062909      | Other non-metallic ores                                                      | その他の非金属鉱物                                                | 3.47E-3                                                          | 0.00E+0                                               | 1.52E-3                                             | 1.94E-3                                                        | 1.16E+2                                     |
| JD33       | 071101      | Coal mining, crude petroleum and natural gas                                 | 石炭・原油・天然ガス                                               | 1.82E-3                                                          | 0.00E+0                                               | 9.73E-4                                             | 8.43E-4                                                        | 7.87E+1                                     |
| JD34       | 0711011     | Coal mining                                                                  | 石炭                                                       | 1.82E-3                                                          | 0.00E+0                                               | 9.73E-4                                             | 8.43E-4                                                        | 7.87E+1                                     |
| JD35       | 0711012     | Crude petroleum                                                              | 原油                                                       | 1.82E-3                                                          | 0.00E+0                                               | 9.73E-4                                             | 8.43E-4                                                        | 7.87E+1                                     |
| JD36       | 0711013     | Natural gas                                                                  | 天然ガス                                                     | 1.82E-3                                                          | 0.00E+0                                               | 9.73E-4                                             | 8.43E-4                                                        | 7.87E+1                                     |
| JD37       | 111101      | Slaughtering and meat processing                                             | と畜(含肉鶏処理)                                                | 1.37E-3                                                          | 0.00E+0                                               | 5.52E-4                                             | 8.17E-4                                                        | 9.54E+1                                     |
| JD38       | 111201      | Processed meat products                                                      | 肉加工品                                                     | 1.85E-3                                                          | 0.00E+0                                               | 3.20E-4                                             | 1.53E-3                                                        | 1.41E+2                                     |
| JD39       | 111202      | Bottled or canned meat products                                              | 畜産びん・かん詰                                                 | 1.20E-3                                                          | 0.00E+0                                               | 3.97E-4                                             | 8.05E-4                                                        | 9.90E+1                                     |
| JD40       | 111203      | Dairy farm products                                                          | 酪農品                                                      | 1.50E-3                                                          | 0.00E+0                                               | 5.85E-4                                             | 9.13E-4                                                        | 9.79E+1                                     |
| JD41       | 111301      | Frozen fish and shellfish                                                    | 冷凍魚介類                                                    | 1.66E-3                                                          | 0.00E+0                                               | 3.19E-4                                             | 1.34E-3                                                        | 1.16E+2                                     |
| JD42       | 111302      | Salted, dried or smoked seafood                                              | 塩・干・くん製品                                                 | 1.72E-3                                                          | 0.00E+0                                               | 2.89E-4                                             | 1.44E-3                                                        | 1.02E+2                                     |
| JD43       | 111303      | Bottled or canned seafood                                                    | 水産びん・かん詰                                                 | 1.46E-3                                                          | 0.00E+0                                               | 4.05E-4                                             | 1.06E-3                                                        | 9.85E+1                                     |
| JD44       | 111304      | Fish paste                                                                   | ねり製品                                                     | 1.61E-3                                                          | 0.00E+0                                               | 4.17E-4                                             | 1.20E-3                                                        | 9.28E+1                                     |
| JD45       | 111309      | Other processed seafood                                                      | その他の水産食品                                                 | 1.37E-3                                                          | 0.00E+0                                               | 3.39E-4                                             | 1.03E-3                                                        | 9.79E+1                                     |
| JD46       | 111401      | Grain milling                                                                | 精穀                                                       | 1.29E-3                                                          | 0.00E+0                                               | 6.53E-4                                             | 6.35E-4                                                        | 8.64E+1                                     |
| JD47       | 111402      | Flour and other grain milled products                                        | 製粉                                                       | 1.81E-3                                                          | 0.00E+0                                               | 5.68E-4                                             | 1.24E-3                                                        | 1.03E+2                                     |
| JD48       | 111501      | Noodles                                                                      | めん類                                                      | 1.32E-3                                                          | 0.00E+0                                               | 4.72E-4                                             | 8.50E-4                                                        | 1.02E+2                                     |
| JD49       | 111502      | Bread                                                                        | パン類                                                      | 1.19E-3                                                          | 0.00E+0                                               | 4.82E-4                                             | 7.12E-4                                                        | 9.19E+1                                     |
| JD50       | 111503      | Confectionery                                                                | 菓子類                                                      | 1.23E-3                                                          | 0.00E+0                                               | 4.27E-4                                             | 8.00E-4                                                        | 9.79E+1                                     |
| JD51       | 111601      | Bottled or canned vegetables and fruits                                      | 農産びん・かん詰                                                 | 1.36E-3                                                          | 0.00E+0                                               | 5.61E-4                                             | 8.00E-4                                                        | 9.73E+1                                     |
| JD52       | 111602      | Preserved agricultural foodstuffs (other than bottled or canned)             | 農産保存食料品(除びん・かん詰)                                         | 9.45E-4                                                          | 0.00E+0                                               | 3.91E-4                                             | 5.55E-4                                                        | 1.01E+2                                     |
| JD53       | 111701      | Sugar                                                                        | 砂糖                                                       | 1.80E-3                                                          | 0.00E+0                                               | 5.00E-4                                             | 1.30E-3                                                        | 1.14E+2                                     |
| JD54       | 111702      | Starch                                                                       | でん粉                                                      | 1.38E-3                                                          | 0.00E+0                                               | 3.58E-4                                             | 1.02E-3                                                        | 1.20E+2                                     |
| JD55       | 111703      | Dextrose, syrup and isomerized sugar                                         | ぶどう糖・水あめ・異性化糖                                            | 1.51E-3                                                          | 0.00E+0                                               | 4.49E-4                                             | 1.06E-3                                                        | 1.22E+2                                     |
| JD56       | 111704      | Vegetable oils and meal                                                      | 植物油脂                                                     | 1.54E-3                                                          | 0.00E+0                                               | 4.31E-4                                             | 1.11E-3                                                        | 1.26E+2                                     |
| JD57       | 111705      | Animal oils and fats                                                         | 動物油脂                                                     | 1.61E-3                                                          | 0.00E+0                                               | 5.23E-4                                             | 1.09E-3                                                        | 1.12E+2                                     |
| JD58       | 111706      | Condiments and seasonings                                                    | 調味料                                                      | 1.24E-3                                                          | 0.00E+0                                               | 5.04E-4                                             | 7.34E-4                                                        | 9.72E+1                                     |
| JD59       | 111901      | Prepared frozen foods                                                        | 冷凍調理食品                                                   | 1.50E-3                                                          | 0.00E+0                                               | 5.20E-4                                             | 9.79E-4                                                        | 9.14E+1                                     |
| JD60       | 111902      | Retort foods                                                                 | レトルト食品                                                   | 1.56E-3                                                          | 0.00E+0                                               | 4.84E-4                                             | 1.08E-3                                                        | 9.42E+1                                     |
| JD61       | 111903      | Dishes, sushi and lunch boxes                                                | そう菜・すし・弁当                                                | 1.29E-3                                                          | 0.00E+0                                               | 4.56E-4                                             | 8.33E-4                                                        | 9.35E+1                                     |
| JD62       | 111904      | School lunch (public) **                                                     | 学校給食(国公立)★★                                              | 8.99E-4                                                          | 0.00E+0                                               | 3.18E-4                                             | 5.81E-4                                                        | 1.01E+2                                     |
| JD63       | 111905      | School lunch (private) *                                                     | 学校給食(私立)★                                                | 9.99E-4                                                          | 0.00E+0                                               | 3.78E-4                                             | 6.21E-4                                                        | 9.50E+1                                     |
| JD64       | 111909      | Other foods                                                                  | その他の食料品                                                  | 1.34E-3                                                          | 0.00E+0                                               | 5.37E-4                                             | 8.04E-4                                                        | 9.87E+1                                     |
| JD65       | 112101      | Refined sake                                                                 | 清酒                                                       | 9.10E-4                                                          | 0.00E+0                                               | 4.26E-4                                             | 4.84E-4                                                        | 9.07E+1                                     |
| JD66       | 112102      | Beer                                                                         | ビール                                                      | 6.23E-4                                                          | 0.00E+0                                               | 2.78E-4                                             | 3.46E-4                                                        | 8.48E+1                                     |
| JD67       | 112103      | Whiskey and brandy                                                           | ウイスキー類                                                   | 7.10E-4                                                          | 0.00E+0                                               | 2.48E-4                                             | 4.61E-4                                                        | 1.09E+2                                     |
| JD68       | 112109      | Other liquors                                                                | その他の酒類                                                   | 9.48E-4                                                          | 0.00E+0                                               | 3.85E-4                                             | 5.64E-4                                                        | 1.03E+2                                     |
| JD69       | 112901      | Tea and roasted coffee                                                       | 茶・コーヒー                                                   | 1.90E-3                                                          | 0.00E+0                                               | 4.16E-4                                             | 1.49E-3                                                        | 9.37E+1                                     |
| JD70       | 112902      | Soft drinks                                                                  | 清涼飲料                                                     | 1.17E-3                                                          | 0.00E+0                                               | 4.71E-4                                             | 7.04E-4                                                        | 9.04E+1                                     |
| JD71       | 112903      | Manufactured ice                                                             | 製氷                                                       | 4.25E-3                                                          | 0.00E+0                                               | 2.58E-3                                             | 1.66E-3                                                        | 7.39E+1                                     |
| JD72       | 113101      | Animal feed                                                                  | 飼料                                                       | 1.38E-3                                                          | 0.00E+0                                               | 3.93E-4                                             | 9.88E-4                                                        | 1.16E+2                                     |
| JD73       | 113102      | Organic fertilizers, n.e.c.                                                  | 有機質肥料(除別掲)                                               | 1.14E-3                                                          | 0.00E+0                                               | 3.52E-4                                             | 7.86E-4                                                        | 9.86E+1                                     |
| JD74       | 114101      | Tobacco                                                                      | たばこ                                                      | 3.49E-4                                                          | 0.00E+0                                               | 1.43E-4                                             | 2.07E-4                                                        | 9.80E+1                                     |
| JD75       | 151101      | Fiber yarns                                                                  | 紡績糸                                                      | 1.23E-3                                                          | 0.00E+0                                               | 3.73E-4                                             | 8.56E-4                                                        | 1.26E+2                                     |
| JD76       | 151201      | Cotton and staple fiber fabrics (inc. fabrics of synthetic spun fibers)      | 綿・スフ織物(含合繊短繊維織物)                                         | 1.34E-3                                                          | 0.00E+0                                               | 4.42E-4                                             | 8.98E-4                                                        | 1.30E+2                                     |
| JD77       | 151202      | Silk and artificial silk fabrics (inc. fabrics of synthetic filament fibers) | 絹・人絹織物(含合繊長繊維織物)                                         | 1.52E-3                                                          | 0.00E+0                                               | 4.84E-4                                             | 1.03E-3                                                        | 1.25E+2                                     |
| JD78       | 151203      | Woolen fabrics, hemp fabrics and other fabrics                               | 毛織物・麻織物・その他の織物                                           | 1.29E-3                                                          | 0.00E+0                                               | 4.03E-4                                             | 8.85E-4                                                        | 1.28E+2                                     |
| JD79       | 151301      | Knitting fabrics                                                             | ニット生地                                                    | 1.07E-3                                                          | 0.00E+0                                               | 3.54E-4                                             | 7.13E-4                                                        | 1.27E+2                                     |
| JD80       | 151401      | Yarn and fabric dyeing and finishing (processing on commission only)         | 染色整理                                                     | 1.66E-3                                                          | 0.00E+0                                               | 4.66E-4                                             | 1.19E-3                                                        | 1.40E+2                                     |
| JD81       | 151901      | Ropes and nets                                                               | 綱・網                                                      | 1.45E-3                                                          | 0.00E+0                                               | 4.69E-4                                             | 9.84E-4                                                        | 1.25E+2                                     |
| JD82       | 151902      | Carpets and floor mats                                                       | じゅうたん・床敷物                                                | 1.56E-3                                                          | 0.00E+0                                               | 5.27E-4                                             | 1.03E-3                                                        | 1.24E+2                                     |
| JD83       | 151903      | Fabricated textiles for medical use                                          | 繊維製衛生材料                                                  | 1.16E-3                                                          | 0.00E+0                                               | 4.76E-4                                             | 6.81E-4                                                        | 9.86E+1                                     |
| JD84       | 151909      | Other fabricated textile products                                            | その他の繊維工業製品                                               | 1.55E-3                                                          | 0.00E+0                                               | 5.84E-4                                             | 9.61E-4                                                        | 1.15E+2                                     |
| JD85       | 152101      | Woven fabric apparel                                                         | 織物製衣服                                                    | 1.19E-3                                                          | 0.00E+0                                               | 4.39E-4                                             | 7.54E-4                                                        | 1.24E+2                                     |
| JD86       | 152102      | Knitted apparel                                                              | ニット製衣服                                                   | 1.16E-3                                                          | 0.00E+0                                               | 4.01E-4                                             | 7.61E-4                                                        | 1.19E+2                                     |
| JD87       | 152209      | Other wearing apparel and clothing accessories                               | その他の衣服・身の回り品                                             | 1.24E-3                                                          | 0.00E+0                                               | 4.45E-4                                             | 7.96E-4                                                        | 1.19E+2                                     |
| JD88       | 152901      | Bedding                                                                      | 寝具                                                       | 1.12E-3                                                          | 0.00E+0                                               | 3.33E-4                                             | 7.86E-4                                                        | 1.12E+2                                     |
| JD89       | 152909      | Other ready-made textile products                                            | その他の繊維既製品                                                | 1.00E-3                                                          | 0.00E+0                                               | 3.56E-4                                             | 6.48E-4                                                        | 1.20E+2                                     |
| JD90       | 161101      | Timber                                                                       | 製材                                                       | 4.65E-3                                                          | 0.00E+0                                               | 5.66E-4                                             | 4.08E-3                                                        | 1.25E+2                                     |
| JD91       | 161102      | Plywood                                                                      | 合板                                                       | 3.73E-3                                                          | 0.00E+0                                               | 9.11E-4                                             | 2.82E-3                                                        | 9.95E+1                                     |
| JD92       | 161103      | Wooden chips                                                                 | 木材チップ                                                    | 2.20E-3                                                          | 0.00E+0                                               | 8.81E-4                                             | 1.32E-3                                                        | 8.26E+1                                     |

Table A6: Embodied global PFCs intensities of Japanese goods and services based on producer price in 2005 [2/5]

| Sector no. | Sector code | Sector name<br>[Japanese domestic commodity]                | Sector name in Japanese<br>[Japanese domestic commodity] | Embodied global PFCs intensities based on producer price in 2005 |                                                       |                                                     |                                                                |                                             |
|------------|-------------|-------------------------------------------------------------|----------------------------------------------------------|------------------------------------------------------------------|-------------------------------------------------------|-----------------------------------------------------|----------------------------------------------------------------|---------------------------------------------|
|            |             |                                                             |                                                          | Total                                                            | (D) Direct emissions<br>in Japan during<br>production | (S) Induced<br>emissions in Japan<br>through supply | (F) Induced emissions<br>in foreign country's<br>supply chains | Coefficient of variance<br>of the intensity |
|            |             |                                                             |                                                          | tCO <sub>2</sub> eq/M-JPY                                        | tCO <sub>2</sub> eq/M-JPY                             | tCO <sub>2</sub> eq/M-JPY                           | tCO <sub>2</sub> eq/M-JPY                                      | %                                           |
| JD93       | 161909      | Other wooden products                                       | その他の木製品                                                  | 1.99E-3                                                          | 0.00E+0                                               | 7.51E-4                                             | 1.24E-3                                                        | 8.25E+1                                     |
| JD94       | 171101      | Wooden furniture and fixtures                               | 木製家具・装備品                                                 | 1.38E-3                                                          | 0.00E+0                                               | 4.95E-4                                             | 8.84E-4                                                        | 9.06E+1                                     |
| JD95       | 171102      | Wooden fixtures                                             | 木製建具                                                     | 1.40E-3                                                          | 0.00E+0                                               | 4.23E-4                                             | 9.73E-4                                                        | 9.17E+1                                     |
| JD96       | 171103      | Metallic furniture and fixture                              | 金属製家具・装備品                                                | 1.58E-3                                                          | 0.00E+0                                               | 6.90E-4                                             | 8.91E-4                                                        | 8.13E+1                                     |
| JD97       | 181101      | Pulp                                                        | パルプ                                                      | 2.65E-3                                                          | 0.00E+0                                               | 4.62E-4                                             | 2.19E-3                                                        | 1.30E+2                                     |
| JD98       | 181201      | Paper                                                       | 洋紙・和紙                                                    | 2.10E-3                                                          | 0.00E+0                                               | 4.73E-4                                             | 1.63E-3                                                        | 9.69E+1                                     |
| JD99       | 181202      | Paperboard                                                  | 板紙                                                       | 2.10E-3                                                          | 0.00E+0                                               | 5.45E-4                                             | 1.55E-3                                                        | 1.00E+2                                     |
| JD100      | 181301      | Corrugated cardboard                                        | 段ボール                                                     | 1.66E-3                                                          | 0.00E+0                                               | 5.94E-4                                             | 1.07E-3                                                        | 9.23E+1                                     |
| JD101      | 181302      | Coated paper and building<br>(construction) paper           | 塗工紙・建設用加工紙                                               | 1.41E-3                                                          | 0.00E+0                                               | 4.69E-4                                             | 9.40E-4                                                        | 1.04E+2                                     |
| JD102      | 182101      | Corrugated card board boxes                                 | 段ボール箱                                                    | 1.04E-3                                                          | 0.00E+0                                               | 4.19E-4                                             | 6.26E-4                                                        | 9.42E+1                                     |
| JD103      | 182109      | Other paper containers                                      | その他の紙製容器                                                 | 1.14E-3                                                          | 0.00E+0                                               | 3.54E-4                                             | 7.90E-4                                                        | 1.10E+2                                     |
| JD104      | 182901      | Paper textile for medical use                               | 紙製衛生材料・用品                                                | 1.45E-3                                                          | 0.00E+0                                               | 5.06E-4                                             | 9.47E-4                                                        | 1.07E+2                                     |
| JD105      | 182909      | Other pulp, paper and processed paper<br>products           | その他のパルプ・紙・紙加工品                                           | 1.09E-3                                                          | 0.00E+0                                               | 3.71E-4                                             | 7.14E-4                                                        | 9.81E+1                                     |
| JD106      | 191101      | Printing, plate making and book binding                     | 印刷・製版・製本                                                 | 9.00E-4                                                          | 0.00E+0                                               | 3.36E-4                                             | 5.65E-4                                                        | 9.48E+1                                     |
| JD107      | 201101      | Chemical fertilizer                                         | 化学肥料                                                     | 2.33E-3                                                          | 0.00E+0                                               | 5.55E-4                                             | 1.77E-3                                                        | 1.16E+2                                     |
| JD108      | 202101      | Industrial soda chemicals                                   | ソーダ工業製品                                                  | 2.81E-3                                                          | 0.00E+0                                               | 1.02E-3                                             | 1.79E-3                                                        | 1.00E+2                                     |
| JD109      | 202901      | Inorganic pigment                                           | 無機顔料                                                     | 2.36E-3                                                          | 0.00E+0                                               | 6.55E-4                                             | 1.71E-3                                                        | 1.13E+2                                     |
| JD110      | 202902      | Compressed gas and liquefied gas                            | 圧縮ガス・液化ガス                                                | 2.81E-3                                                          | 0.00E+0                                               | 1.34E-3                                             | 1.48E-3                                                        | 8.73E+1                                     |
| JD111      | 202903      | Salt                                                        | 塩                                                        | 2.86E-3                                                          | 0.00E+0                                               | 1.24E-3                                             | 1.62E-3                                                        | 8.41E+1                                     |
| JD112      | 202909      | Other industrial inorganic chemicals                        | その他の無機化学工業製品                                             | 2.39E-3                                                          | 0.00E+0                                               | 7.95E-4                                             | 1.59E-3                                                        | 1.00E+2                                     |
| JD113      | 203101      | Petrochemical basic products                                | 石油化学基礎製品                                                 | 8.38E-3                                                          | 0.00E+0                                               | 7.45E-4                                             | 7.64E-3                                                        | 2.25E+2                                     |
| JD114      | 203102      | Petrochemical aromatic products<br>(except synthetic resin) | 石油化学系芳香族製品                                               | 7.21E-3                                                          | 0.00E+0                                               | 7.37E-4                                             | 6.48E-3                                                        | 2.18E+2                                     |
| JD115      | 203201      | Aliphatic intermediates                                     | 脂肪族中間物                                                   | 5.23E-3                                                          | 0.00E+0                                               | 1.00E-3                                             | 4.23E-3                                                        | 1.77E+2                                     |
| JD116      | 203202      | Cyclic intermediates                                        | 環状中間物                                                    | 4.78E-3                                                          | 0.00E+0                                               | 7.86E-4                                             | 3.99E-3                                                        | 1.78E+2                                     |
| JD117      | 203301      | Synthetic rubber                                            | 合成ゴム                                                     | 4.32E-3                                                          | 0.00E+0                                               | 1.06E-3                                             | 3.25E-3                                                        | 1.60E+2                                     |
| JD118      | 203901      | Methane derivatives                                         | メタン誘導品                                                   | 2.45E-3                                                          | 0.00E+0                                               | 8.48E-4                                             | 1.60E-3                                                        | 1.09E+2                                     |
| JD119      | 203902      | Oil and fat industrial chemicals                            | 油脂加工製品                                                   | 1.54E-3                                                          | 0.00E+0                                               | 5.44E-4                                             | 9.98E-4                                                        | 1.06E+2                                     |
| JD120      | 203903      | Plasticizers                                                | 可塑剤                                                      | 2.25E-3                                                          | 0.00E+0                                               | 5.15E-4                                             | 1.73E-3                                                        | 1.44E+2                                     |
| JD121      | 203904      | Synthetic dyes                                              | 合成染料                                                     | 2.02E-3                                                          | 0.00E+0                                               | 3.49E-4                                             | 1.67E-3                                                        | 1.72E+2                                     |
| JD122      | 203909      | Other industrial organic chemicals                          | その他の有機化学工業製品                                             | 2.36E-3                                                          | 0.00E+0                                               | 6.50E-4                                             | 1.71E-3                                                        | 1.26E+2                                     |
| JD123      | 204101      | Thermo-setting resins                                       | 熱硬化性樹脂                                                   | 2.76E-3                                                          | 0.00E+0                                               | 5.81E-4                                             | 2.18E-3                                                        | 1.54E+2                                     |
| JD124      | 204102      | Thermoplastics resins                                       | 熱可塑性樹脂                                                   | 4.98E-3                                                          | 0.00E+0                                               | 7.98E-4                                             | 4.18E-3                                                        | 1.92E+2                                     |
| JD125      | 204103      | High function resins                                        | 高機能性樹脂                                                   | 3.06E-3                                                          | 0.00E+0                                               | 6.91E-4                                             | 2.37E-3                                                        | 1.52E+2                                     |
| JD126      | 204109      | Other resins                                                | その他の合成樹脂                                                 | 3.02E-3                                                          | 0.00E+0                                               | 6.34E-4                                             | 2.38E-3                                                        | 1.55E+2                                     |
| JD127      | 205101      | Rayon and acetate                                           | レーヨン・アセテート                                               | 2.35E-3                                                          | 0.00E+0                                               | 7.33E-4                                             | 1.62E-3                                                        | 1.10E+2                                     |
| JD128      | 205102      | Synthetic fibers                                            | 合成繊維                                                     | 2.58E-3                                                          | 0.00E+0                                               | 6.38E-4                                             | 1.94E-3                                                        | 1.44E+2                                     |
| JD129      | 206101      | Medicaments                                                 | 医薬品                                                      | 1.25E-3                                                          | 0.00E+0                                               | 4.66E-4                                             | 7.81E-4                                                        | 1.06E+2                                     |
| JD130      | 207101      | Soap, synthetic detergents and surface<br>active agents     | 石けん・合成洗剤・界面活性剤                                           | 1.57E-3                                                          | 0.00E+0                                               | 4.59E-4                                             | 1.11E-3                                                        | 1.29E+2                                     |
| JD131      | 207102      | Cosmetics, toilet preparations and<br>dentifrices           | 化粧品・歯磨                                                   | 1.29E-3                                                          | 0.00E+0                                               | 4.53E-4                                             | 8.33E-4                                                        | 1.09E+2                                     |
| JD132      | 207201      | Paint and varnishes                                         | 塗料                                                       | 2.11E-3                                                          | 0.00E+0                                               | 5.40E-4                                             | 1.57E-3                                                        | 1.36E+2                                     |
| JD133      | 207202      | Printing ink                                                | 印刷インキ                                                    | 1.94E-3                                                          | 0.00E+0                                               | 5.11E-4                                             | 1.43E-3                                                        | 1.36E+2                                     |
| JD134      | 207301      | Photographic sensitive materials                            | 写真感光材料                                                   | 1.67E-3                                                          | 0.00E+0                                               | 5.46E-4                                             | 1.12E-3                                                        | 1.07E+2                                     |
| JD135      | 207401      | Agricultural chemicals                                      | 農薬                                                       | 1.57E-3                                                          | 0.00E+0                                               | 5.15E-4                                             | 1.05E-3                                                        | 1.18E+2                                     |
| JD136      | 207901      | Gelatin and adhesives                                       | ゼラチン・接着剤                                                 | 1.82E-3                                                          | 0.00E+0                                               | 4.74E-4                                             | 1.35E-3                                                        | 1.38E+2                                     |
| JD137      | 207909      | Other final chemical products                               | その他の化学最終製品                                               | 2.10E-3                                                          | 0.00E+0                                               | 6.10E-4                                             | 1.49E-3                                                        | 1.24E+2                                     |
| JD138      | 211101      | Petroleum refinery products (inc.<br>greases)               | 石油製品                                                     | 9.62E-3                                                          | 0.00E+0                                               | 6.87E-4                                             | 8.93E-3                                                        | 2.63E+2                                     |
| JD139      | 212101      | Coal products                                               | 石炭製品                                                     | 5.13E-3                                                          | 0.00E+0                                               | 4.09E-4                                             | 4.72E-3                                                        | 1.28E+2                                     |
| JD140      | 212102      | Paving materials                                            | 舗装材料                                                     | 3.50E-3                                                          | 0.00E+0                                               | 8.48E-4                                             | 2.66E-3                                                        | 1.87E+2                                     |
| JD141      | 221101      | Plastic products                                            | プラスチック製品                                                 | 1.83E-3                                                          | 0.00E+0                                               | 5.93E-4                                             | 1.23E-3                                                        | 1.25E+2                                     |
| JD142      | 231101      | Tires and inner tubes                                       | タイヤ・チューブ                                                 | 1.97E-3                                                          | 0.00E+0                                               | 7.21E-4                                             | 1.25E-3                                                        | 1.09E+2                                     |
| JD143      | 231901      | Rubber footwear                                             | ゴム製履物                                                    | 9.40E-4                                                          | 0.00E+0                                               | 3.57E-4                                             | 5.83E-4                                                        | 1.13E+2                                     |
| JD144      | 231902      | Plastic footwear                                            | プラスチック製履物                                                | 1.03E-3                                                          | 0.00E+0                                               | 3.49E-4                                             | 6.81E-4                                                        | 1.18E+2                                     |
| JD145      | 231909      | Other rubber products                                       | その他のゴム製品                                                 | 1.66E-3                                                          | 0.00E+0                                               | 7.01E-4                                             | 9.58E-4                                                        | 9.92E+1                                     |
| JD146      | 241101      | Leather footwear                                            | 革製履物                                                     | 1.00E-3                                                          | 0.00E+0                                               | 3.37E-4                                             | 6.66E-4                                                        | 1.19E+2                                     |
| JD147      | 241201      | Leather and fur skins                                       | 製革・毛皮                                                    | 1.80E-3                                                          | 0.00E+0                                               | 3.63E-4                                             | 1.44E-3                                                        | 1.28E+2                                     |
| JD148      | 241202      | Miscellaneous leather products                              | かばん・袋物・その他の革製品                                           | 1.13E-3                                                          | 0.00E+0                                               | 3.61E-4                                             | 7.73E-4                                                        | 1.15E+2                                     |
| JD149      | 251101      | Sheet glass and safety glass                                | 板ガラス・安全ガラス                                               | 1.64E-3                                                          | 0.00E+0                                               | 6.47E-4                                             | 9.94E-4                                                        | 9.87E+1                                     |
| JD150      | 251201      | Glass fiber and glass fiber products,<br>n.e.c.             | ガラス繊維・同製品                                                | 2.42E-3                                                          | 0.00E+0                                               | 1.05E-3                                             | 1.37E-3                                                        | 1.01E+2                                     |
| JD151      | 251909      | Other glass products                                        | その他のガラス製品                                                | 1.92E-3                                                          | 0.00E+0                                               | 8.72E-4                                             | 1.05E-3                                                        | 9.28E+1                                     |
| JD152      | 252101      | Cement                                                      | セメント                                                     | 2.67E-3                                                          | 0.00E+0                                               | 9.10E-4                                             | 1.76E-3                                                        | 9.24E+1                                     |
| JD153      | 252201      | Ready mixed concrete                                        | 生コンクリート                                                  | 2.08E-3                                                          | 0.00E+0                                               | 1.02E-3                                             | 1.05E-3                                                        | 9.00E+1                                     |
| JD154      | 252301      | Cement products                                             | セメント製品                                                   | 1.60E-3                                                          | 0.00E+0                                               | 7.91E-4                                             | 8.07E-4                                                        | 8.33E+1                                     |
| JD155      | 253101      | Pottery, china and earthenware                              | 陶磁器                                                      | 1.88E-3                                                          | 0.00E+0                                               | 7.42E-4                                             | 1.14E-3                                                        | 1.03E+2                                     |
| JD156      | 259901      | Clay refractories                                           | 耐火物                                                      | 2.88E-3                                                          | 0.00E+0                                               | 1.47E-3                                             | 1.40E-3                                                        | 7.26E+1                                     |
| JD157      | 259902      | Other structural clay products                              | その他の建設用土石製品                                              | 1.65E-3                                                          | 0.00E+0                                               | 4.49E-4                                             | 1.20E-3                                                        | 1.44E+2                                     |
| JD158      | 259903      | Carbon and graphite products                                | 炭素・黒鉛製品                                                  | 2.35E-3                                                          | 0.00E+0                                               | 1.05E-3                                             | 1.30E-3                                                        | 9.09E+1                                     |
| JD159      | 259904      | Abrasive                                                    | 研磨材                                                      | 1.87E-3                                                          | 0.00E+0                                               | 7.73E-4                                             | 1.09E-3                                                        | 8.72E+1                                     |
| JD160      | 259909      | Miscellaneous ceramic, stone and clay<br>products           | その他の窯業・土石製品                                              | 1.91E-3                                                          | 0.00E+0                                               | 9.31E-4                                             | 9.75E-4                                                        | 8.32E+1                                     |
| JD161      | 261101      | Pig iron                                                    | 鉄鉄                                                       | 3.50E-3                                                          | 0.00E+0                                               | 4.59E-4                                             | 3.04E-3                                                        | 1.38E+2                                     |
| JD162      | 261102      | Ferro alloys                                                | フェロアロイ                                                   | 3.03E-3                                                          | 0.00E+0                                               | 7.46E-4                                             | 2.28E-3                                                        | 1.10E+2                                     |
| JD163      | 261103      | Crude steel (converters)                                    | 粗鋼(転炉)                                                   | 2.88E-3                                                          | 0.00E+0                                               | 6.74E-4                                             | 2.20E-3                                                        | 1.10E+2                                     |
| JD164      | 261104      | Crude steel (electric furnaces)                             | 粗鋼(電気炉)                                                  | 2.17E-3                                                          | 0.00E+0                                               | 5.71E-4                                             | 1.60E-3                                                        | 1.00E+2                                     |
| JD165      | 2612011     | Scrap iron                                                  | 鉄屑                                                       | 0.00E+0                                                          | 0.00E+0                                               | 0.00E+0                                             | 0.00E+0                                                        | 0.00E+0                                     |
| JD166      | 262101      | Hot rolled steel                                            | 熱間圧延鋼材                                                   | 2.12E-3                                                          | 0.00E+0                                               | 5.66E-4                                             | 1.55E-3                                                        | 9.72E+1                                     |
| JD167      | 262201      | Steel pipes and tubes                                       | 鋼管                                                       | 1.70E-3                                                          | 0.00E+0                                               | 5.25E-4                                             | 1.17E-3                                                        | 9.16E+1                                     |
| JD168      | 262301      | Cold-finished steel                                         | 冷間仕上げ鋼材                                                  | 1.90E-3                                                          | 0.00E+0                                               | 5.31E-4                                             | 1.37E-3                                                        | 9.47E+1                                     |
| JD169      | 262302      | Coated steel                                                | めっき鋼材                                                    | 1.82E-3                                                          | 0.00E+0                                               | 6.03E-4                                             | 1.22E-3                                                        | 8.89E+1                                     |
| JD170      | 263101      | Cast and forged steel                                       | 鍛造鋼                                                      | 1.81E-3                                                          | 0.00E+0                                               | 6.82E-4                                             | 1.13E-3                                                        | 8.40E+1                                     |
| JD171      | 263102      | Cast iron pipes and tubes                                   | 铸铁管                                                      | 1.53E-3                                                          | 0.00E+0                                               | 5.70E-4                                             | 9.63E-4                                                        | 1.02E+2                                     |
| JD172      | 263103      | Cast and forged materials (iron)                            | 铸铁品及び鍛工品(鉄)                                              | 2.20E-3                                                          | 0.00E+0                                               | 9.79E-4                                             | 1.22E-3                                                        | 8.27E+1                                     |
| JD173      | 264901      | Iron and steel shearing and slitting                        | 鉄鋼シャースリット業                                               | 1.53E-3                                                          | 0.00E+0                                               | 4.93E-4                                             | 1.03E-3                                                        | 9.00E+1                                     |
| JD174      | 264909      | Other iron or steel products                                | その他の鉄鋼製品                                                 | 1.24E-3                                                          | 0.00E+0                                               | 4.37E-4                                             | 8.07E-4                                                        | 9.03E+1                                     |
| JD175      | 271101      | Copper                                                      | 銅                                                        | 3.89E-3                                                          | 0.00E+0                                               | 3.80E-4                                             | 3.51E-3                                                        | 1.79E+2                                     |
| JD176      | 271102      | Lead and zinc (inc. regenerated lead)                       | 鉛・亜鉛(含再生)                                                | 2.88E-3                                                          | 0.00E+0                                               | 6.18E-4                                             | 2.26E-3                                                        | 1.26E+2                                     |
| JD177      | 271103      | Aluminum (inc. regenerated aluminum)                        | アルミニウム(含再生)                                              | 3.27E-2                                                          | 2.43E-2                                               | 5.80E-3                                             | 2.59E-3                                                        | 1.03E+1                                     |
| JD178      | 271109      | Other non-ferrous metals                                    | その他の非鉄金属地金                                               | 3.25E-3                                                          | 0.00E+0                                               | 3.52E-4                                             | 2.90E-3                                                        | 1.70E+2                                     |
| JD179      | 2712011     | Non-ferrous metal scrap                                     | 非鉄金属屑                                                    | 0.00E+0                                                          | 0.00E+0                                               | 0.00E+0                                             | 0.00E+0                                                        | 0.00E+0                                     |
| JD180      | 272101      | Electric wires and cables                                   | 電線・ケーブル                                                  | 3.38E-3                                                          | 0.00E+0                                               | 1.17E-3                                             | 2.20E-3                                                        | 8.52E+1                                     |
| JD181      | 272102      | Optical fiber cables                                        | 光ファイバケーブル                                                | 1.23E-2                                                          | 0.00E+0                                               | 1.69E-3                                             | 1.06E-2                                                        | 1.88E+2                                     |
| JD182      | 272201      | Rolled and drawn copper and copper<br>alloys                | 伸銅品                                                      | 2.84E-3                                                          | 0.00E+0                                               | 5.18E-4                                             | 2.32E-3                                                        | 1.24E+2                                     |
| JD183      | 272202      | Rolled and drawn aluminum                                   | アルミ圧延製品                                                  | 1.15E-2                                                          | 0.00E+0                                               | 2.45E-3                                             | 9.04E-3                                                        | 1.02E+2                                     |

Table A6: Embodied global PFCs intensities of Japanese goods and services based on producer price in 2005 [3/5]

| Sector no. | Sector code | Sector name<br>[Japanese domestic commodity]               | Sector name in Japanese<br>[Japanese domestic commodity] | Embodied global PFCs intensities based on producer price in 2005 |                                                       |                                                     |                                                                |                                             |
|------------|-------------|------------------------------------------------------------|----------------------------------------------------------|------------------------------------------------------------------|-------------------------------------------------------|-----------------------------------------------------|----------------------------------------------------------------|---------------------------------------------|
|            |             |                                                            |                                                          | Total                                                            | (D) Direct emissions<br>in Japan during<br>production | (S) Induced<br>emissions in Japan<br>through supply | (F) Induced emissions<br>in foreign country's<br>supply chains | Coefficient of variance<br>of the intensity |
|            |             |                                                            |                                                          | tCO <sub>2</sub> eq/M-JPY                                        | tCO <sub>2</sub> eq/M-JPY                             | tCO <sub>2</sub> eq/M-JPY                           | tCO <sub>2</sub> eq/M-JPY                                      | %                                           |
| JD184      | 272203      | Non-ferrous metal castings and forgings                    | 非鉄金属素形材                                                  | 1.15E-2                                                          | 0.00E+0                                               | 7.93E-3                                             | 3.59E-3                                                        | 3.85E+1                                     |
| JD185      | 272204      | Nuclear fuels                                              | 核燃料                                                      | 1.84E-3                                                          | 0.00E+0                                               | 2.28E-4                                             | 1.62E-3                                                        | 1.75E+2                                     |
| JD186      | 272209      | Other non-ferrous metal products                           | その他の非鉄金属製品                                               | 6.52E-3                                                          | 0.00E+0                                               | 9.67E-4                                             | 5.55E-3                                                        | 1.46E+2                                     |
| JD187      | 281101      | Metal products for construction                            | 建設用金属製品                                                  | 2.10E-3                                                          | 0.00E+0                                               | 9.96E-4                                             | 1.10E-3                                                        | 7.67E+1                                     |
| JD188      | 281201      | Metal products for architecture                            | 建築用金属製品                                                  | 2.98E-3                                                          | 0.00E+0                                               | 9.21E-4                                             | 2.06E-3                                                        | 8.58E+1                                     |
| JD189      | 289101      | Gas and oil appliances and heating and cooking apparatus   | ガス・石油機器及び暖房機器                                            | 1.76E-2                                                          | 0.00E+0                                               | 1.56E-2                                             | 2.05E-3                                                        | 1.81E+1                                     |
| JD190      | 289901      | Bolts, nuts, rivets and springs                            | ボルト・ナット・リベット及びスプリング                                      | 1.50E-3                                                          | 0.00E+0                                               | 6.29E-4                                             | 8.71E-4                                                        | 8.50E+1                                     |
| JD191      | 289902      | Metal containers, fabricated plate and sheet metal         | 金属製容器及び製缶板金製品                                            | 1.45E-3                                                          | 0.00E+0                                               | 5.94E-4                                             | 8.53E-4                                                        | 7.96E+1                                     |
| JD192      | 289903      | Plumber's supplies, powder metallurgy products and tools   | 配管工事付属品・粉末や金製品・道具類                                       | 1.85E-3                                                          | 0.00E+0                                               | 6.88E-4                                             | 1.16E-3                                                        | 9.29E+1                                     |
| JD193      | 289909      | Other metal products                                       | その他の金属製品                                                 | 2.73E-3                                                          | 0.00E+0                                               | 1.75E-3                                             | 9.78E-4                                                        | 4.66E+1                                     |
| JD194      | 301101      | Boilers                                                    | ボイラ                                                      | 1.53E-3                                                          | 0.00E+0                                               | 6.55E-4                                             | 8.76E-4                                                        | 1.09E+2                                     |
| JD195      | 301102      | Turbines                                                   | タービン                                                     | 2.90E-3                                                          | 0.00E+0                                               | 7.89E-4                                             | 2.11E-3                                                        | 1.53E+2                                     |
| JD196      | 301103      | Engines                                                    | 原動機                                                      | 5.20E-3                                                          | 0.00E+0                                               | 3.27E-3                                             | 1.93E-3                                                        | 7.03E+1                                     |
| JD197      | 301201      | Conveyors                                                  | 運搬機械                                                     | 1.57E-2                                                          | 0.00E+0                                               | 8.26E-3                                             | 7.42E-3                                                        | 1.14E+2                                     |
| JD198      | 301301      | Refrigerators and air conditioning apparatus               | 冷凍機・温湿調整装置                                               | 2.30E-2                                                          | 0.00E+0                                               | 6.39E-3                                             | 1.66E-2                                                        | 1.87E+2                                     |
| JD199      | 301901      | Pumps and compressors                                      | ポンプ及び圧縮機                                                 | 8.22E-3                                                          | 0.00E+0                                               | 1.96E-3                                             | 6.26E-3                                                        | 1.86E+2                                     |
| JD200      | 301902      | Machinists' precision tools                                | 機械工具                                                     | 2.74E-3                                                          | 0.00E+0                                               | 1.37E-3                                             | 1.37E-3                                                        | 9.23E+1                                     |
| JD201      | 301909      | Other general industrial machinery and equipment           | その他の一般産業機械及び装置                                           | 3.28E-3                                                          | 0.00E+0                                               | 1.55E-3                                             | 1.72E-3                                                        | 1.11E+2                                     |
| JD202      | 302101      | Machinery and equipment for construction and mining        | 建設・鉱山機械                                                  | 3.53E-3                                                          | 0.00E+0                                               | 1.78E-3                                             | 1.75E-3                                                        | 1.03E+2                                     |
| JD203      | 302201      | Chemical machinery                                         | 化学機械                                                     | 5.00E-3                                                          | 0.00E+0                                               | 3.39E-3                                             | 1.62E-3                                                        | 6.32E+1                                     |
| JD204      | 302301      | Industrial robots                                          | 産業用ロボット                                                  | 2.64E-2                                                          | 0.00E+0                                               | 1.88E-2                                             | 7.59E-3                                                        | 6.54E+1                                     |
| JD205      | 302401      | Metal machine tools                                        | 金属工作機械                                                   | 9.01E-3                                                          | 0.00E+0                                               | 5.71E-3                                             | 3.29E-3                                                        | 7.25E+1                                     |
| JD206      | 302402      | Metal processing machinery                                 | 金属加工機械                                                   | 2.72E-3                                                          | 0.00E+0                                               | 1.56E-3                                             | 1.16E-3                                                        | 7.89E+1                                     |
| JD207      | 302901      | Machinery for agricultural use                             | 農業用機械                                                    | 3.35E-3                                                          | 0.00E+0                                               | 2.04E-3                                             | 1.31E-3                                                        | 7.40E+1                                     |
| JD208      | 302902      | Textile machinery                                          | 繊維機械                                                     | 6.79E-3                                                          | 0.00E+0                                               | 4.45E-3                                             | 2.34E-3                                                        | 7.86E+1                                     |
| JD209      | 302903      | Food processing machinery and equipment                    | 食品機械・同装置                                                 | 4.38E-3                                                          | 0.00E+0                                               | 1.96E-3                                             | 2.42E-3                                                        | 1.18E+2                                     |
| JD210      | 302904      | Semiconductor making equipment                             | 半導体製造装置                                                  | 5.36E-3                                                          | 0.00E+0                                               | 2.78E-3                                             | 2.58E-3                                                        | 9.83E+1                                     |
| JD211      | 302905      | Vacuum equipment and vacuum component                      | 真空装置・真空機器                                                | 6.50E-3                                                          | 0.00E+0                                               | 1.90E-3                                             | 4.60E-3                                                        | 1.71E+2                                     |
| JD212      | 302909      | Other special machinery for industrial use                 | その他の特殊産業用機械                                              | 6.46E-3                                                          | 0.00E+0                                               | 3.62E-3                                             | 2.84E-3                                                        | 9.40E+1                                     |
| JD213      | 303101      | Metal molds                                                | 金型                                                       | 1.36E-3                                                          | 0.00E+0                                               | 6.75E-4                                             | 6.85E-4                                                        | 7.27E+1                                     |
| JD214      | 303102      | Bearings                                                   | ベアリング                                                    | 1.59E-3                                                          | 0.00E+0                                               | 6.25E-4                                             | 9.63E-4                                                        | 1.00E+2                                     |
| JD215      | 303109      | Other general machines and parts                           | その他の一般機械器具及び部品                                           | 4.86E-3                                                          | 0.00E+0                                               | 3.60E-3                                             | 1.26E-3                                                        | 4.00E+1                                     |
| JD216      | 311101      | Copy machine                                               | 複写機                                                      | 7.03E-2                                                          | 0.00E+0                                               | 4.86E-2                                             | 2.17E-2                                                        | 7.04E+1                                     |
| JD217      | 311109      | Other office machines                                      | その他の事務用機械                                                | 5.26E-2                                                          | 0.00E+0                                               | 3.50E-2                                             | 1.76E-2                                                        | 7.86E+1                                     |
| JD218      | 311201      | Machinery for service industry                             | サービス用機器                                                  | 5.55E-2                                                          | 0.00E+0                                               | 4.35E-2                                             | 1.20E-2                                                        | 4.88E+1                                     |
| JD219      | 321101      | Rotating electrical equipment                              | 回転電気機械                                                   | 3.34E-2                                                          | 0.00E+0                                               | 2.17E-2                                             | 1.16E-2                                                        | 7.91E+1                                     |
| JD220      | 321102      | Transformers and reactors                                  | 変圧器・変成器                                                  | 1.30E-2                                                          | 0.00E+0                                               | 4.30E-3                                             | 8.66E-3                                                        | 1.49E+2                                     |
| JD221      | 321103      | Relay switches and switchboards                            | 開閉制御装置及び配電盤                                              | 4.70E-2                                                          | 0.00E+0                                               | 3.47E-2                                             | 1.24E-2                                                        | 5.74E+1                                     |
| JD222      | 321104      | Wiring devices and supplies                                | 配線器具                                                     | 3.15E-2                                                          | 0.00E+0                                               | 2.73E-3                                             | 2.88E-2                                                        | 2.31E+2                                     |
| JD223      | 321105      | Electrical equipment for internal combustion engines       | 内燃機関電装品                                                  | 1.91E-2                                                          | 0.00E+0                                               | 1.24E-2                                             | 6.74E-3                                                        | 8.41E+1                                     |
| JD224      | 321109      | Other electrical devices and parts                         | その他の産業用電気機器                                              | 3.34E-2                                                          | 0.00E+0                                               | 2.20E-2                                             | 1.14E-2                                                        | 7.57E+1                                     |
| JD225      | 322101      | Applied electronic equipment                               | 電子応用装置                                                   | 7.74E-2                                                          | 0.00E+0                                               | 3.85E-2                                             | 3.90E-2                                                        | 1.09E+2                                     |
| JD226      | 323101      | Electric measuring instruments                             | 電気計測器                                                    | 5.86E-2                                                          | 0.00E+0                                               | 2.49E-2                                             | 3.37E-2                                                        | 1.34E+2                                     |
| JD227      | 324101      | Electric bulbs                                             | 電球類                                                      | 3.12E-2                                                          | 0.00E+0                                               | 2.15E-3                                             | 2.90E-2                                                        | 1.91E+2                                     |
| JD228      | 324102      | Electric lighting fixtures and apparatus                   | 電気照明器具                                                   | 6.95E-2                                                          | 0.00E+0                                               | 2.42E-2                                             | 4.53E-2                                                        | 2.01E+2                                     |
| JD229      | 324103      | Batteries                                                  | 電池                                                       | 7.59E-3                                                          | 0.00E+0                                               | 8.81E-4                                             | 6.71E-3                                                        | 1.67E+2                                     |
| JD230      | 324109      | Other electrical devices and parts                         | その他の電気機械器具                                               | 9.98E-3                                                          | 0.00E+0                                               | 9.91E-4                                             | 8.99E-3                                                        | 1.65E+2                                     |
| JD231      | 325101      | Household air-conditioners                                 | 民生用エアコンディショナ                                             | 4.38E-2                                                          | 0.00E+0                                               | 3.00E-2                                             | 1.38E-2                                                        | 7.15E+1                                     |
| JD232      | 325102      | Household electric appliances (except air-conditioners)    | 民生用電気機器(除エアコン)                                           | 5.74E-2                                                          | 0.00E+0                                               | 4.10E-2                                             | 1.64E-2                                                        | 6.59E+1                                     |
| JD233      | 331101      | Video recording and playback equipment                     | ビデオ機器                                                    | 6.48E-2                                                          | 0.00E+0                                               | 4.11E-2                                             | 2.36E-2                                                        | 8.32E+1                                     |
| JD234      | 331102      | Electric audio equipment                                   | 電気音響機器                                                   | 5.46E-2                                                          | 0.00E+0                                               | 3.21E-2                                             | 2.24E-2                                                        | 9.00E+1                                     |
| JD235      | 331103      | Radio and television sets                                  | ラジオ・テレビ受信機                                               | 1.22E-1                                                          | 0.00E+0                                               | 9.93E-2                                             | 2.24E-2                                                        | 3.97E+1                                     |
| JD236      | 332101      | Wired communication equipment                              | 有線電気通信機器                                                 | 4.48E-2                                                          | 0.00E+0                                               | 2.73E-2                                             | 1.74E-2                                                        | 8.17E+1                                     |
| JD237      | 332102      | Cellular phones                                            | 携帯電話機                                                    | 8.99E-2                                                          | 0.00E+0                                               | 6.77E-2                                             | 2.22E-2                                                        | 5.47E+1                                     |
| JD238      | 332103      | Radio communication equipment (except cellular phones)     | 無線電気通信機器(除携帯電話機)                                         | 7.13E-2                                                          | 0.00E+0                                               | 4.87E-2                                             | 2.26E-2                                                        | 6.70E+1                                     |
| JD239      | 332109      | Other communication equipment                              | その他の電気通信機器                                               | 5.89E-2                                                          | 0.00E+0                                               | 4.12E-2                                             | 1.77E-2                                                        | 6.18E+1                                     |
| JD240      | 333101      | Personal Computers                                         | パーソナルコンピュータ                                              | 7.81E-2                                                          | 0.00E+0                                               | 4.35E-2                                             | 3.46E-2                                                        | 1.02E+2                                     |
| JD241      | 333102      | Electronic computing equipment (except personal computers) | 電子計算機本体(除パソコン)                                           | 6.61E-2                                                          | 0.00E+0                                               | 3.30E-2                                             | 3.31E-2                                                        | 1.13E+2                                     |
| JD242      | 333103      | Electronic computing equipment (accessory equipment)       | 電子計算機付属装置                                                | 8.64E-2                                                          | 0.00E+0                                               | 6.03E-2                                             | 2.62E-2                                                        | 6.93E+1                                     |
| JD243      | 341101      | Semiconductor devices                                      | 半導体素子                                                    | 4.37E+0                                                          | 4.35E+0                                               | 5.31E-3                                             | 9.26E-3                                                        | 4.08E-1                                     |
| JD244      | 341102      | Integrated circuits                                        | 集積回路                                                     | 3.71E-1                                                          | 3.12E-1                                               | 4.12E-2                                             | 1.74E-2                                                        | 1.00E+1                                     |
| JD245      | 342101      | Electron tubes                                             | 電子管                                                      | 6.50E-3                                                          | 0.00E+0                                               | 3.38E-3                                             | 3.12E-3                                                        | 8.71E+1                                     |
| JD246      | 342102      | Liquid crystal element                                     | 液晶素子                                                     | 4.24E-1                                                          | 3.11E-1                                               | 8.26E-2                                             | 3.04E-2                                                        | 1.70E+1                                     |
| JD247      | 342103      | Magnetic tapes and discs                                   | 磁気テープ・磁気ディスク                                             | 2.01E-3                                                          | 0.00E+0                                               | 8.67E-4                                             | 1.14E-3                                                        | 9.83E+1                                     |
| JD248      | 342109      | Other electronic components                                | その他の電子部品                                                 | 5.00E-2                                                          | 7.78E-3                                               | 2.52E-2                                             | 1.71E-2                                                        | 6.67E+1                                     |
| JD249      | 351101      | Passenger motor cars                                       | 乗用車                                                      | 2.64E-2                                                          | 0.00E+0                                               | 2.34E-2                                             | 2.98E-3                                                        | 2.36E+1                                     |
| JD250      | 352101      | Trucks, buses and other cars                               | トラック・バス・その他の自動車                                          | 2.86E-2                                                          | 0.00E+0                                               | 2.60E-2                                             | 2.66E-3                                                        | 1.87E+1                                     |
| JD251      | 353101      | Two-wheel motor vehicles                                   | 二輪自動車                                                    | 2.30E-2                                                          | 0.00E+0                                               | 1.99E-2                                             | 3.08E-3                                                        | 3.03E+1                                     |
| JD252      | 354101      | Motor vehicle bodies                                       | 自動車車体                                                    | 2.59E-2                                                          | 0.00E+0                                               | 2.42E-2                                             | 1.67E-3                                                        | 1.23E+1                                     |
| JD253      | 354102      | Internal combustion engines for motor vehicles and parts   | 自動車用内燃機関・同部分品                                            | 6.67E-3                                                          | 0.00E+0                                               | 3.55E-3                                             | 3.12E-3                                                        | 1.04E+2                                     |
| JD254      | 354103      | Motor vehicle parts and accessories                        | 自動車部品                                                    | 6.19E-2                                                          | 2.76E-2                                               | 3.23E-2                                             | 2.11E-3                                                        | 6.49E+0                                     |
| JD255      | 361101      | Steel ships                                                | 鋼船                                                       | 4.81E-3                                                          | 0.00E+0                                               | 2.02E-3                                             | 2.79E-3                                                        | 1.11E+2                                     |
| JD256      | 361102      | Ships (except steel ships)                                 | その他の船舶                                                   | 5.15E-3                                                          | 0.00E+0                                               | 2.16E-3                                             | 2.99E-3                                                        | 1.21E+2                                     |
| JD257      | 361103      | Internal combustion engines for vessels                    | 船用内燃機関                                                   | 3.00E-3                                                          | 0.00E+0                                               | 1.13E-3                                             | 1.86E-3                                                        | 1.27E+2                                     |
| JD258      | 361110      | Repair of ships                                            | 船舶修理                                                     | 2.29E-3                                                          | 0.00E+0                                               | 1.08E-3                                             | 1.22E-3                                                        | 9.77E+1                                     |
| JD259      | 362101      | Rolling stock                                              | 鉄道車両                                                     | 1.13E-2                                                          | 0.00E+0                                               | 9.05E-3                                             | 2.24E-3                                                        | 3.53E+1                                     |
| JD260      | 362110      | Repair of rolling stock                                    | 鉄道車両修理                                                   | 4.31E-3                                                          | 0.00E+0                                               | 2.72E-3                                             | 1.59E-3                                                        | 5.88E+1                                     |
| JD261      | 362201      | Aircrafts                                                  | 航空機                                                      | 8.02E-3                                                          | 0.00E+0                                               | 5.35E-3                                             | 2.67E-3                                                        | 7.29E+1                                     |
| JD262      | 362210      | Repair of aircrafts                                        | 航空機修理                                                    | 7.93E-3                                                          | 0.00E+0                                               | 1.42E-3                                             | 6.50E-3                                                        | 2.15E+2                                     |
| JD263      | 362901      | Bicycles                                                   | 自転車                                                      | 2.74E-3                                                          | 0.00E+0                                               | 8.43E-4                                             | 1.90E-3                                                        | 1.33E+2                                     |
| JD264      | 362909      | Other transport equipment                                  | その他の輸送機械                                                 | 1.05E-2                                                          | 0.00E+0                                               | 9.16E-3                                             | 1.33E-3                                                        | 2.31E+1                                     |
| JD265      | 371101      | Camera                                                     | カメラ                                                      | 9.27E-2                                                          | 0.00E+0                                               | 7.13E-2                                             | 2.14E-2                                                        | 4.91E+1                                     |
| JD266      | 371109      | Other photographic and optical instruments                 | その他の光学機械                                                 | 1.33E-2                                                          | 0.00E+0                                               | 8.84E-3                                             | 4.50E-3                                                        | 7.84E+1                                     |

Table A6: Embodied global PFCs intensities of Japanese goods and services based on producer price in 2005 [4/5]

| Sector no. | Sector code | Sector name<br>[Japanese domestic commodity]                   | Sector name in Japanese<br>[Japanese domestic commodity] | Embodied global PFCs intensities based on producer price in 2005 |                                                       |                                                     |                                                                |                                             |
|------------|-------------|----------------------------------------------------------------|----------------------------------------------------------|------------------------------------------------------------------|-------------------------------------------------------|-----------------------------------------------------|----------------------------------------------------------------|---------------------------------------------|
|            |             |                                                                |                                                          | Total                                                            | (D) Direct emissions<br>in Japan during<br>production | (S) Induced<br>emissions in Japan<br>through supply | (F) Induced emissions<br>in foreign country's<br>supply chains | Coefficient of variance<br>of the intensity |
|            |             |                                                                |                                                          | tCO <sub>2</sub> eq/M-JPY                                        | tCO <sub>2</sub> eq/M-JPY                             | tCO <sub>2</sub> eq/M-JPY                           | tCO <sub>2</sub> eq/M-JPY                                      | %                                           |
| JD267      | 371201      | Watches and clocks                                             | 時計                                                       | 4.35E-2                                                          | 0.00E+0                                               | 3.76E-2                                             | 5.83E-3                                                        | 2.74E+1                                     |
| JD268      | 371901      | Professional and scientific instruments                        | 理化学機械器具                                                  | 8.52E-3                                                          | 0.00E+0                                               | 6.71E-3                                             | 1.82E-3                                                        | 4.10E+1                                     |
| JD269      | 371902      | Analytical instruments, testing machine, measuring instruments | 分析器・試験機・計量器・測定器                                          | 6.07E-2                                                          | 0.00E+0                                               | 5.12E-2                                             | 9.51E-3                                                        | 3.37E+1                                     |
| JD270      | 371903      | Medical instruments                                            | 医療用機械器具                                                  | 5.26E-2                                                          | 0.00E+0                                               | 4.25E-2                                             | 1.02E-2                                                        | 3.99E+1                                     |
| JD271      | 391101      | Toys and games                                                 | がん具                                                      | 6.95E-2                                                          | 0.00E+0                                               | 5.87E-2                                             | 1.08E-2                                                        | 3.55E+1                                     |
| JD272      | 391102      | Sporting and athletic goods                                    | 運動用品                                                     | 2.12E-3                                                          | 0.00E+0                                               | 1.10E-3                                             | 1.02E-3                                                        | 7.79E+1                                     |
| JD273      | 391901      | Musical instruments                                            | 楽器                                                       | 5.77E-2                                                          | 0.00E+0                                               | 5.44E-2                                             | 3.36E-3                                                        | 1.15E+1                                     |
| JD274      | 391902      | Audio and video records, other information recording media     | 情報記録物                                                    | 1.21E-3                                                          | 0.00E+0                                               | 5.20E-4                                             | 6.89E-4                                                        | 9.94E+1                                     |
| JD275      | 391903      | Stationery                                                     | 筆記具・文具                                                   | 1.20E-3                                                          | 0.00E+0                                               | 4.88E-4                                             | 7.13E-4                                                        | 1.00E+2                                     |
| JD276      | 391904      | Jewelry and adornments                                         | 身辺細貨品                                                    | 2.11E-3                                                          | 0.00E+0                                               | 4.42E-4                                             | 1.67E-3                                                        | 1.16E+2                                     |
| JD277      | 391905      | "Tatami" (straw matting) and straw products                    | 畳・わら加工品                                                  | 7.41E-4                                                          | 0.00E+0                                               | 3.14E-4                                             | 4.27E-4                                                        | 8.92E+1                                     |
| JD278      | 391906      | Ordnance                                                       | 武器                                                       | 2.37E-2                                                          | 0.00E+0                                               | 2.15E-2                                             | 2.26E-3                                                        | 1.56E+1                                     |
| JD279      | 391909      | Miscellaneous manufacturing products                           | その他の製造工業製品                                               | 1.52E-3                                                          | 0.00E+0                                               | 6.59E-4                                             | 8.61E-4                                                        | 8.88E+1                                     |
| JD280      | 392101      | Reuse and recycling                                            | 再生资源回収・加工処理                                              | 1.05E-3                                                          | 0.00E+0                                               | 4.61E-4                                             | 5.92E-4                                                        | 1.25E+2                                     |
| JD281      | 411101      | Residential construction (wooden)                              | 住宅建築(木造)                                                 | 1.95E-3                                                          | 0.00E+0                                               | 7.79E-4                                             | 1.18E-3                                                        | 8.72E+1                                     |
| JD282      | 411102      | Residential construction (non-wooden)                          | 住宅建築(非木造)                                                | 2.14E-3                                                          | 0.00E+0                                               | 9.26E-4                                             | 1.22E-3                                                        | 9.08E+1                                     |
| JD283      | 411201      | Non-residential construction (wooden)                          | 非住宅建築(木造)                                                | 2.50E-3                                                          | 0.00E+0                                               | 1.09E-3                                             | 1.41E-3                                                        | 9.31E+1                                     |
| JD284      | 411202      | Non-residential construction (non-wooden)                      | 非住宅建築(非木造)                                               | 2.52E-3                                                          | 0.00E+0                                               | 1.17E-3                                             | 1.35E-3                                                        | 9.37E+1                                     |
| JD285      | 412101      | Repair of construction                                         | 建設補修                                                     | 2.33E-3                                                          | 0.00E+0                                               | 1.14E-3                                             | 1.19E-3                                                        | 8.51E+1                                     |
| JD286      | 413101      | Public construction of roads                                   | 道路関係公共事業                                                 | 1.41E-3                                                          | 0.00E+0                                               | 6.01E-4                                             | 8.10E-4                                                        | 1.06E+2                                     |
| JD287      | 413102      | Public construction of rivers, drainages and others            | 河川・下水道・その他の公共事業                                          | 2.41E-3                                                          | 0.00E+0                                               | 1.22E-3                                             | 1.19E-3                                                        | 8.78E+1                                     |
| JD288      | 413103      | Agricultural public construction                               | 農林関係公共事業                                                 | 1.42E-3                                                          | 0.00E+0                                               | 5.92E-4                                             | 8.23E-4                                                        | 1.04E+2                                     |
| JD289      | 413201      | Railway construction                                           | 鉄道軌道建設                                                   | 1.90E-3                                                          | 0.00E+0                                               | 8.90E-4                                             | 1.01E-3                                                        | 8.49E+1                                     |
| JD290      | 413202      | Electric power facilities construction                         | 電力施設建設                                                   | 2.99E-3                                                          | 0.00E+0                                               | 1.39E-3                                             | 1.61E-3                                                        | 1.02E+2                                     |
| JD291      | 413203      | Telecommunication facilities construction                      | 電気通信施設建設                                                 | 8.37E-3                                                          | 0.00E+0                                               | 1.98E-3                                             | 6.38E-3                                                        | 1.68E+2                                     |
| JD292      | 413209      | Other civil engineering and construction                       | その他の土木建設                                                 | 1.91E-3                                                          | 0.00E+0                                               | 9.12E-4                                             | 9.94E-4                                                        | 9.09E+1                                     |
| JD293      | 5111001     | Electricity                                                    | 事業用電力                                                    | 3.70E-3                                                          | 0.00E+0                                               | 1.36E-3                                             | 2.34E-3                                                        | 1.09E+2                                     |
| JD294      | 511104      | On-site power generation                                       | 自家発電                                                     | 3.17E-3                                                          | 0.00E+0                                               | 6.27E-4                                             | 2.54E-3                                                        | 1.52E+2                                     |
| JD295      | 512101      | Gas supply                                                     | 都市ガス                                                     | 3.13E-3                                                          | 0.00E+0                                               | 4.64E-4                                             | 2.67E-3                                                        | 1.98E+2                                     |
| JD296      | 512201      | Steam and hot water supply                                     | 熱供給業                                                     | 3.18E-3                                                          | 0.00E+0                                               | 1.42E-3                                             | 1.75E-3                                                        | 1.02E+2                                     |
| JD297      | 521101      | Water supply                                                   | 上水道・簡易水道                                                 | 8.42E-4                                                          | 0.00E+0                                               | 4.41E-4                                             | 4.01E-4                                                        | 8.36E+1                                     |
| JD298      | 521102      | Industrial water supply                                        | 工業用水                                                     | 1.42E-3                                                          | 0.00E+0                                               | 8.41E-4                                             | 5.83E-4                                                        | 7.59E+1                                     |
| JD299      | 521103      | Sewage disposal **                                             | 下水道★★                                                    | 3.83E-3                                                          | 0.00E+0                                               | 1.72E-3                                             | 2.11E-3                                                        | 9.98E+1                                     |
| JD300      | 521201      | Waste management services (public) **                          | 廃棄物処理(公営)★★                                              | 1.70E-3                                                          | 0.00E+0                                               | 8.71E-4                                             | 8.31E-4                                                        | 8.74E+1                                     |
| JD301      | 521202      | Waste management services (private)                            | 廃棄物処理(産業)                                                | 1.16E-3                                                          | 0.00E+0                                               | 6.02E-4                                             | 5.56E-4                                                        | 8.59E+1                                     |
| JD302      | 611101      | Wholesale trade                                                | 卸売                                                       | 7.45E-4                                                          | 0.00E+0                                               | 3.84E-4                                             | 3.61E-4                                                        | 8.45E+1                                     |
| JD303      | 611201      | Retail trade                                                   | 小売                                                       | 7.76E-4                                                          | 0.00E+0                                               | 3.46E-4                                             | 4.30E-4                                                        | 1.01E+2                                     |
| JD304      | 621101      | Financial service                                              | 金融                                                       | 6.90E-4                                                          | 0.00E+0                                               | 2.86E-4                                             | 4.04E-4                                                        | 1.31E+2                                     |
| JD305      | 621201      | Life insurance                                                 | 生命保険                                                     | 5.87E-4                                                          | 0.00E+0                                               | 2.73E-4                                             | 3.14E-4                                                        | 9.29E+1                                     |
| JD306      | 621202      | Non-life insurance                                             | 損害保険                                                     | 4.93E-4                                                          | 0.00E+0                                               | 2.38E-4                                             | 2.54E-4                                                        | 9.00E+1                                     |
| JD307      | 641101      | Real estate agencies and managers                              | 不動産仲介・管理業                                                | 4.77E-4                                                          | 0.00E+0                                               | 1.99E-4                                             | 2.78E-4                                                        | 9.95E+1                                     |
| JD308      | 641102      | Real estate rental service                                     | 不動産賃貸業                                                   | 3.15E-4                                                          | 0.00E+0                                               | 1.31E-4                                             | 1.84E-4                                                        | 1.04E+2                                     |
| JD309      | 642101      | House rent                                                     | 住宅賃貸料                                                    | 3.33E-4                                                          | 0.00E+0                                               | 1.52E-4                                             | 1.80E-4                                                        | 9.18E+1                                     |
| JD310      | 642201      | House rent (imputed house rent)                                | 住宅賃貸料(帰属家賃)                                              | 1.63E-4                                                          | 0.00E+0                                               | 7.60E-5                                             | 8.73E-5                                                        | 9.10E+1                                     |
| JD311      | 711101      | Railway transport (passengers)                                 | 鉄道旅客輸送                                                   | 9.06E-4                                                          | 0.00E+0                                               | 4.27E-4                                             | 4.78E-4                                                        | 8.71E+1                                     |
| JD312      | 711201      | Railway transport (freight)                                    | 鉄道貨物輸送                                                   | 1.44E-3                                                          | 0.00E+0                                               | 6.72E-4                                             | 7.66E-4                                                        | 9.32E+1                                     |
| JD313      | 712101      | Bus transport service                                          | バス                                                       | 2.00E-3                                                          | 0.00E+0                                               | 1.20E-3                                             | 8.03E-4                                                        | 9.31E+1                                     |
| JD314      | 712102      | Hired car and taxi transport                                   | ハイヤー・タクシー                                                | 1.57E-3                                                          | 0.00E+0                                               | 7.94E-4                                             | 7.77E-4                                                        | 1.10E+2                                     |
| JD315      | 712201      | Road freight transport(except Self-transport by private cars)  | 道路貨物輸送(除自家輸送)                                            | 1.83E-3                                                          | 0.00E+0                                               | 9.24E-4                                             | 9.10E-4                                                        | 1.22E+2                                     |
| JD316      | 713101      | Self-transport by private cars (passengers)                    | 自家輸送(旅客自動車)                                              | 7.41E-3                                                          | 0.00E+0                                               | 4.02E-3                                             | 3.40E-3                                                        | 1.19E+2                                     |
| JD317      | 713201      | Self-transport by private cars (freight)                       | 自家輸送(貨物自動車)                                              | 7.26E-3                                                          | 0.00E+0                                               | 4.26E-3                                             | 2.99E-3                                                        | 1.05E+2                                     |
| JD318      | 714101      | Ocean transport                                                | 外洋輸送                                                     | 8.61E-3                                                          | 0.00E+0                                               | 4.94E-4                                             | 8.12E-3                                                        | 1.79E+2                                     |
| JD319      | 714201      | Coastal and inland water transport                             | 沿海・内水面輸送                                                 | 1.86E-3                                                          | 0.00E+0                                               | 3.60E-4                                             | 1.50E-3                                                        | 1.95E+2                                     |
| JD320      | 714301      | Harbor transport service                                       | 港湾運送                                                     | 6.09E-4                                                          | 0.00E+0                                               | 2.29E-4                                             | 3.81E-4                                                        | 1.18E+2                                     |
| JD321      | 715101      | Air transport                                                  | 航空輸送                                                     | 3.85E-3                                                          | 0.00E+0                                               | 9.81E-4                                             | 2.87E-3                                                        | 1.09E+2                                     |
| JD322      | 716101      | Consigned freight forwarding                                   | 貨物利用運送                                                   | 1.44E-3                                                          | 0.00E+0                                               | 9.51E-4                                             | 4.91E-4                                                        | 6.18E+1                                     |
| JD323      | 717101      | Storage facility service                                       | 倉庫                                                       | 9.19E-4                                                          | 0.00E+0                                               | 4.65E-4                                             | 4.55E-4                                                        | 8.39E+1                                     |
| JD324      | 718101      | Packing service                                                | こん包                                                      | 9.05E-4                                                          | 0.00E+0                                               | 3.38E-4                                             | 5.67E-4                                                        | 8.93E+1                                     |
| JD325      | 718901      | Facility service for road transport                            | 道路輸送施設提供                                                 | 6.64E-4                                                          | 0.00E+0                                               | 3.47E-4                                             | 3.17E-4                                                        | 8.37E+1                                     |
| JD326      | 718902      | Port and water traffic control **                              | 水運施設管理★★                                                 | 8.59E-4                                                          | 0.00E+0                                               | 3.82E-4                                             | 4.78E-4                                                        | 9.73E+1                                     |
| JD327      | 718903      | Services relating to water transport                           | その他の水運付帯サービス                                             | 3.86E-4                                                          | 0.00E+0                                               | 1.85E-4                                             | 2.01E-4                                                        | 9.09E+1                                     |
| JD328      | 718904      | Airport and air traffic control (public) **                    | 航空施設管理(国営)★★                                             | 2.15E-3                                                          | 0.00E+0                                               | 1.08E-3                                             | 1.07E-3                                                        | 9.36E+1                                     |
| JD329      | 718905      | Airport and air traffic control                                | 航空施設管理(産業)                                               | 1.52E-3                                                          | 0.00E+0                                               | 7.25E-4                                             | 7.98E-4                                                        | 9.17E+1                                     |
| JD330      | 718906      | Services relating to air transport                             | その他の航空付帯サービス                                             | 8.44E-4                                                          | 0.00E+0                                               | 3.93E-4                                             | 4.51E-4                                                        | 9.24E+1                                     |
| JD331      | 718909      | Travel agency and other services relating to transport         | 旅行・その他の運輸付帯サービス                                          | 7.21E-4                                                          | 0.00E+0                                               | 3.54E-4                                             | 3.67E-4                                                        | 8.93E+1                                     |
| JD332      | 731101      | Postal service*                                                | 郵便・信書便                                                   | 4.64E-4                                                          | 0.00E+0                                               | 1.70E-4                                             | 2.94E-4                                                        | 1.12E+2                                     |
| JD333      | 731201      | Fixed telecommunication                                        | 固定電気通信                                                   | 7.62E-4                                                          | 0.00E+0                                               | 3.09E-4                                             | 4.53E-4                                                        | 1.08E+2                                     |
| JD334      | 731202      | Mobile telecommunication                                       | 移動電気通信                                                   | 6.52E-4                                                          | 0.00E+0                                               | 3.20E-4                                             | 3.32E-4                                                        | 9.06E+1                                     |
| JD335      | 731203      | Other telecommunication                                        | その他の電気通信                                                 | 9.47E-4                                                          | 0.00E+0                                               | 4.25E-4                                             | 5.21E-4                                                        | 9.63E+1                                     |
| JD336      | 731909      | Other services relating to communication                       | その他の通信サービス                                               | 1.19E-3                                                          | 0.00E+0                                               | 6.54E-4                                             | 5.37E-4                                                        | 8.04E+1                                     |
| JD337      | 732101      | Public broadcasting                                            | 公共放送                                                     | 1.50E-3                                                          | 0.00E+0                                               | 7.55E-4                                             | 7.43E-4                                                        | 9.41E+1                                     |
| JD338      | 732102      | Private broadcasting                                           | 民間放送                                                     | 1.41E-3                                                          | 0.00E+0                                               | 4.71E-4                                             | 9.42E-4                                                        | 1.29E+2                                     |
| JD339      | 732103      | Cable broadcasting                                             | 有線放送                                                     | 1.06E-3                                                          | 0.00E+0                                               | 5.00E-4                                             | 5.64E-4                                                        | 9.49E+1                                     |
| JD340      | 733101      | Information services                                           | 情報サービス                                                   | 8.52E-4                                                          | 0.00E+0                                               | 4.48E-4                                             | 4.04E-4                                                        | 8.43E+1                                     |
| JD341      | 734101      | Internet based services                                        | インターネット附随サービス                                            | 9.13E-4                                                          | 0.00E+0                                               | 4.19E-4                                             | 4.94E-4                                                        | 9.44E+1                                     |
| JD342      | 735101      | Image information production and distribution industry         | 映像情報制作・配給業                                               | 3.05E-3                                                          | 0.00E+0                                               | 6.41E-4                                             | 2.41E-3                                                        | 1.69E+2                                     |
| JD343      | 735102      | Newspaper                                                      | 新聞                                                       | 1.08E-3                                                          | 0.00E+0                                               | 3.84E-4                                             | 6.96E-4                                                        | 9.52E+1                                     |
| JD344      | 735103      | Publication                                                    | 出版                                                       | 8.51E-4                                                          | 0.00E+0                                               | 2.87E-4                                             | 5.64E-4                                                        | 9.72E+1                                     |
| JD345      | 735104      | News syndicates and private detective agencies                 | ニュース供給・興信所                                               | 9.02E-4                                                          | 0.00E+0                                               | 4.00E-4                                             | 5.02E-4                                                        | 9.70E+1                                     |
| JD346      | 811101      | Public administration (central) **                             | 公務(中央)★★                                                 | 3.62E-3                                                          | 0.00E+0                                               | 2.04E-3                                             | 1.57E-3                                                        | 8.54E+1                                     |
| JD347      | 811201      | Public administration (local) **                               | 公務(地方)★★                                                 | 6.37E-4                                                          | 0.00E+0                                               | 3.19E-4                                             | 3.18E-4                                                        | 9.01E+1                                     |
| JD348      | 821101      | School education (public) **                                   | 学校教育(国公立)★★                                              | 3.27E-4                                                          | 0.00E+0                                               | 1.70E-4                                             | 1.57E-4                                                        | 8.46E+1                                     |
| JD349      | 821102      | School education (private) *                                   | 学校教育(私立)★                                                | 8.33E-4                                                          | 0.00E+0                                               | 4.42E-4                                             | 3.91E-4                                                        | 8.14E+1                                     |
| JD350      | 821301      | Social education (public) **                                   | 社会教育(国公立)★★                                              | 6.80E-4                                                          | 0.00E+0                                               | 2.77E-4                                             | 4.04E-4                                                        | 1.02E+2                                     |
| JD351      | 821302      | Social education (private, non-profit) *                       | 社会教育(非営利)★                                               | 1.32E-3                                                          | 0.00E+0                                               | 7.01E-4                                             | 6.18E-4                                                        | 8.09E+1                                     |
| JD352      | 821303      | Other educational and training institutions (public) **        | その他の教育訓練機関(国公立)★★                                        | 1.39E-3                                                          | 0.00E+0                                               | 4.81E-4                                             | 9.06E-4                                                        | 1.23E+2                                     |



Table A6: Embodied global PFCs intensities of Japanese goods and services based on producer price in 2005 [5/5]

| Sector no. | Sector code | Sector name<br>[Japanese domestic commodity]                                                | Sector name in Japanese<br>[Japanese domestic commodity] | Embodied global PFCs intensities based on producer price in 2005 |                                                       |                                                     |                                                                |                                             |
|------------|-------------|---------------------------------------------------------------------------------------------|----------------------------------------------------------|------------------------------------------------------------------|-------------------------------------------------------|-----------------------------------------------------|----------------------------------------------------------------|---------------------------------------------|
|            |             |                                                                                             |                                                          | Total                                                            | (D) Direct emissions<br>in Japan during<br>production | (S) Induced<br>emissions in Japan<br>through supply | (F) Induced emissions<br>in foreign country's<br>supply chains | Coefficient of variance<br>of the intensity |
|            |             |                                                                                             |                                                          | tCO <sub>2</sub> eq/M-JPY                                        | tCO <sub>2</sub> eq/M-JPY                             | tCO <sub>2</sub> eq/M-JPY                           | tCO <sub>2</sub> eq/M-JPY                                      | %                                           |
| JD353      | 821304      | Other educational and training institutions (profit-making)                                 | その他の教育訓練機関(産業)                                           | 1.40E-3                                                          | 0.00E+0                                               | 7.27E-4                                             | 6.73E-4                                                        | 9.39E+1                                     |
| JD354      | 822101      | Research institutes for natural science (public) **                                         | 自然科学研究機関(国公立)★★                                          | 1.38E-3                                                          | 0.00E+0                                               | 5.63E-4                                             | 8.13E-4                                                        | 9.93E+1                                     |
| JD355      | 822102      | Research institutes for cultural and social science (public) **                             | 人文科学研究機関(国公立)★★                                          | 1.41E-3                                                          | 0.00E+0                                               | 6.08E-4                                             | 8.01E-4                                                        | 1.04E+2                                     |
| JD356      | 822103      | Research institutes for natural sciences (private, non-profit) *                            | 自然科学研究機関(非営利)★                                           | 2.00E-3                                                          | 0.00E+0                                               | 9.96E-4                                             | 1.00E-3                                                        | 8.71E+1                                     |
| JD357      | 822104      | Research institutes for cultural and social science (private, non-profit) *                 | 人文科学研究機関(非営利)★                                           | 9.74E-4                                                          | 0.00E+0                                               | 4.85E-4                                             | 4.89E-4                                                        | 8.69E+1                                     |
| JD358      | 822105      | Research institutes for natural sciences (profit-making)                                    | 自然科学研究機関(産業)                                             | 2.58E-3                                                          | 0.00E+0                                               | 1.15E-3                                             | 1.43E-3                                                        | 1.01E+2                                     |
| JD359      | 822106      | Research institutes for cultural and social science (profit-making)                         | 人文科学研究機関(産業)                                             | 8.32E-4                                                          | 0.00E+0                                               | 3.75E-4                                             | 4.56E-4                                                        | 9.36E+1                                     |
| JD360      | 822201      | Research and development (intra-enterprise)                                                 | 企業内研究開発                                                  | 1.28E-3                                                          | 0.00E+0                                               | 5.98E-4                                             | 6.83E-4                                                        | 9.30E+1                                     |
| JD361      | 831101      | Medical service (public)                                                                    | 医療(国公立)                                                  | 8.37E-3                                                          | 0.00E+0                                               | 9.28E-4                                             | 7.44E-3                                                        | 1.92E+2                                     |
| JD362      | 831102      | Medical service (non-profit foundations, etc.)                                              | 医療(公益法人等)                                                | 4.70E-3                                                          | 0.00E+0                                               | 7.44E-4                                             | 3.95E-3                                                        | 1.80E+2                                     |
| JD363      | 831103      | Medical service (medical corporations, etc.)                                                | 医療(医療法人等)                                                | 6.95E-3                                                          | 0.00E+0                                               | 7.62E-4                                             | 6.19E-3                                                        | 1.93E+2                                     |
| JD364      | 831201      | Health and hygiene (public) **                                                              | 保健衛生(国公立)★★                                              | 8.63E-4                                                          | 0.00E+0                                               | 4.99E-4                                             | 3.64E-4                                                        | 7.49E+1                                     |
| JD365      | 831202      | Health and hygiene (profit-making)                                                          | 保健衛生(産業)                                                 | 1.67E-3                                                          | 0.00E+0                                               | 1.04E-3                                             | 6.32E-4                                                        | 6.78E+1                                     |
| JD366      | 831301      | Social insurance (public) **                                                                | 社会保険事業(国公立)★★                                            | 8.93E-4                                                          | 0.00E+0                                               | 4.68E-4                                             | 4.25E-4                                                        | 8.32E+1                                     |
| JD367      | 831302      | Social insurance (private, non-profit) *                                                    | 社会保険事業(非営利)★                                             | 8.97E-4                                                          | 0.00E+0                                               | 4.59E-4                                             | 4.38E-4                                                        | 8.57E+1                                     |
| JD368      | 831303      | Social welfare (public) **                                                                  | 社会福祉(国公立)★★                                              | 7.92E-4                                                          | 0.00E+0                                               | 4.46E-4                                             | 3.45E-4                                                        | 7.28E+1                                     |
| JD369      | 831304      | Social welfare (private, non-profit) *                                                      | 社会福祉(非営利)★                                               | 7.31E-4                                                          | 0.00E+0                                               | 4.02E-4                                             | 3.30E-4                                                        | 7.47E+1                                     |
| JD370      | 831305      | Social welfare (profit-making)                                                              | 社会福祉(産業)                                                 | 7.45E-4                                                          | 0.00E+0                                               | 3.96E-4                                             | 3.49E-4                                                        | 7.93E+1                                     |
| JD371      | 831401      | Nursing care (In-home)                                                                      | 介護(居宅)                                                   | 1.47E-3                                                          | 0.00E+0                                               | 4.07E-4                                             | 1.06E-3                                                        | 1.42E+2                                     |
| JD372      | 831402      | Nursing care (In-facility)                                                                  | 介護(施設)                                                   | 1.89E-3                                                          | 0.00E+0                                               | 4.52E-4                                             | 1.44E-3                                                        | 1.52E+2                                     |
| JD373      | 841101      | Private non-profit institutions serving enterprises                                         | 対企業民間非営利団体                                               | 9.83E-4                                                          | 0.00E+0                                               | 4.59E-4                                             | 5.24E-4                                                        | 9.48E+1                                     |
| JD374      | 841102      | Private non-profit institutions serving households, n.e.c. *                                | 対家計民間非営利団体(除別掲)★                                         | 7.55E-4                                                          | 0.00E+0                                               | 3.64E-4                                             | 3.91E-4                                                        | 8.94E+1                                     |
| JD375      | 851101      | Advertising services                                                                        | 広告                                                       | 1.02E-3                                                          | 0.00E+0                                               | 3.49E-4                                             | 6.71E-4                                                        | 1.16E+2                                     |
| JD376      | 851201      | Goods rental and leasing (except car rental)                                                | 物品賃貸業(除貸自動車)                                             | 4.03E-3                                                          | 0.00E+0                                               | 2.59E-3                                             | 1.44E-3                                                        | 7.38E+1                                     |
| JD377      | 851301      | Car rental and leasing                                                                      | 貸自動車業                                                    | 1.21E-3                                                          | 0.00E+0                                               | 9.11E-4                                             | 2.98E-4                                                        | 4.53E+1                                     |
| JD378      | 851410      | Repair of motor vehicles                                                                    | 自動車修理                                                    | 1.62E-2                                                          | 0.00E+0                                               | 1.50E-2                                             | 1.21E-3                                                        | 1.48E+1                                     |
| JD379      | 851510      | Repair of machine                                                                           | 機械修理                                                     | 3.09E-2                                                          | 0.00E+0                                               | 2.03E-2                                             | 1.06E-2                                                        | 7.40E+1                                     |
| JD380      | 851901      | Building maintenance services                                                               | 建物サービス                                                   | 5.59E-4                                                          | 0.00E+0                                               | 2.63E-4                                             | 2.96E-4                                                        | 9.55E+1                                     |
| JD381      | 851902      | Judicial, financial and accounting services                                                 | 法務・財務・会計サービス                                             | 4.24E-4                                                          | 0.00E+0                                               | 1.88E-4                                             | 2.35E-4                                                        | 9.71E+1                                     |
| JD382      | 851903      | Civil engineering and construction services                                                 | 土木建築サービス                                                 | 5.65E-4                                                          | 0.00E+0                                               | 2.35E-4                                             | 3.31E-4                                                        | 9.78E+1                                     |
| JD383      | 851904      | Worker dispatching services                                                                 | 労働者派遣サービス                                                | 9.13E-5                                                          | 0.00E+0                                               | 3.72E-5                                             | 5.41E-5                                                        | 1.00E+2                                     |
| JD384      | 851909      | Other business services                                                                     | その他の対事業所サービス                                             | 7.15E-4                                                          | 0.00E+0                                               | 3.90E-4                                             | 3.24E-4                                                        | 8.16E+1                                     |
| JD385      | 861101      | Movie theaters                                                                              | 映画館                                                      | 2.34E-3                                                          | 0.00E+0                                               | 6.37E-4                                             | 1.70E-3                                                        | 1.44E+2                                     |
| JD386      | 861102      | Performances (except otherwise classified), theatrical companies                            | 興行場(除別掲)・興行団                                             | 9.04E-4                                                          | 0.00E+0                                               | 4.65E-4                                             | 4.40E-4                                                        | 9.81E+1                                     |
| JD387      | 861103      | Amusement and recreation facilities                                                         | 遊戯場                                                      | 1.70E-3                                                          | 0.00E+0                                               | 9.71E-4                                             | 7.30E-4                                                        | 7.59E+1                                     |
| JD388      | 861104      | Stadiums and companies of bicycle, horse, motorcar and motorboat races                      | 競輪・競馬等の競走場・競技団                                           | 8.57E-4                                                          | 0.00E+0                                               | 4.17E-4                                             | 4.40E-4                                                        | 8.92E+1                                     |
| JD389      | 861105      | Sport facility service, public gardens and amusement parks                                  | スポーツ施設提供業・公園・遊園地                                         | 9.47E-4                                                          | 0.00E+0                                               | 4.20E-4                                             | 5.27E-4                                                        | 9.58E+1                                     |
| JD390      | 861109      | Other amusement and recreation services                                                     | その他の娯楽                                                   | 1.25E-3                                                          | 0.00E+0                                               | 7.03E-4                                             | 5.42E-4                                                        | 7.95E+1                                     |
| JD391      | 861201      | General eating and drinking places (except coffee shops)                                    | 一般飲食店(除喫茶店)                                              | 1.01E-3                                                          | 0.00E+0                                               | 3.55E-4                                             | 6.60E-4                                                        | 9.41E+1                                     |
| JD392      | 861202      | Coffee shops                                                                                | 喫茶店                                                      | 9.37E-4                                                          | 0.00E+0                                               | 3.43E-4                                             | 5.94E-4                                                        | 9.73E+1                                     |
| JD393      | 861203      | Eating and drinking places for pleasures                                                    | 遊興飲食店                                                    | 8.05E-4                                                          | 0.00E+0                                               | 2.93E-4                                             | 5.12E-4                                                        | 1.03E+2                                     |
| JD394      | 861301      | Hotels                                                                                      | 宿泊業                                                      | 8.97E-4                                                          | 0.00E+0                                               | 3.43E-4                                             | 5.53E-4                                                        | 9.90E+1                                     |
| JD395      | 861401      | Cleaning                                                                                    | 洗濯業                                                      | 9.52E-4                                                          | 0.00E+0                                               | 4.50E-4                                             | 5.02E-4                                                        | 9.83E+1                                     |
| JD396      | 861402      | Barber shops                                                                                | 理容業                                                      | 4.56E-4                                                          | 0.00E+0                                               | 1.64E-4                                             | 2.92E-4                                                        | 1.21E+2                                     |
| JD397      | 861403      | Beauty shops                                                                                | 美容業                                                      | 5.78E-4                                                          | 0.00E+0                                               | 2.64E-4                                             | 3.14E-4                                                        | 9.62E+1                                     |
| JD398      | 861404      | Public baths                                                                                | 浴場業                                                      | 1.20E-3                                                          | 0.00E+0                                               | 4.53E-4                                             | 7.51E-4                                                        | 1.27E+2                                     |
| JD399      | 861409      | Other cleaning, barber shops, beauty shops and public baths                                 | その他の洗濯・理容・美容・浴場業                                         | 8.05E-4                                                          | 0.00E+0                                               | 3.41E-4                                             | 4.64E-4                                                        | 1.01E+2                                     |
| JD400      | 861901      | Photographic studios                                                                        | 写真業                                                      | 9.94E-4                                                          | 0.00E+0                                               | 5.25E-4                                             | 4.70E-4                                                        | 8.53E+1                                     |
| JD401      | 861902      | Ceremonial occasions                                                                        | 冠婚葬祭業                                                    | 9.03E-4                                                          | 0.00E+0                                               | 3.76E-4                                             | 5.27E-4                                                        | 1.10E+2                                     |
| JD402      | 861903      | Miscellaneous repairs, n.e.c.                                                               | 各種修理業(除別掲)                                               | 1.64E-3                                                          | 0.00E+0                                               | 1.11E-3                                             | 5.36E-4                                                        | 5.72E+1                                     |
| JD403      | 861904      | Supplementary tutorial schools, instruction services for arts, culture and technical skills | 個人教授業                                                    | 5.62E-4                                                          | 0.00E+0                                               | 2.78E-4                                             | 2.84E-4                                                        | 8.75E+1                                     |
| JD404      | 861909      | Other personal services                                                                     | その他の対個人サービス                                              | 6.51E-4                                                          | 0.00E+0                                               | 3.24E-4                                             | 3.26E-4                                                        | 9.28E+1                                     |
| JD405      | 890000      | Office supplies                                                                             | 事務用品                                                     | 5.67E-3                                                          | 0.00E+0                                               | 2.34E-3                                             | 3.33E-3                                                        | 1.12E+2                                     |
| JD406      | 900000      | Activities not elsewhere classified                                                         | 分類不明                                                     | 2.27E-3                                                          | 0.00E+0                                               | 8.83E-4                                             | 1.39E-3                                                        | 1.03E+2                                     |

Table A7: Embodied global HFCs intensities of Japanese goods and services based on producer price in 2005 [1/5]

| Sector no. | Sector code | Sector name<br>[Japanese domestic commodity]                                 | Sector name in Japanese<br>[Japanese domestic commodity] | Embodied global HFCs intensities based on producer price in 2005 |                                                       |                                                     |                                                                |                                             |
|------------|-------------|------------------------------------------------------------------------------|----------------------------------------------------------|------------------------------------------------------------------|-------------------------------------------------------|-----------------------------------------------------|----------------------------------------------------------------|---------------------------------------------|
|            |             |                                                                              |                                                          | Total                                                            | (D) Direct emissions<br>in Japan during<br>production | (S) Induced<br>emissions in Japan<br>through supply | (F) Induced emissions<br>in foreign country's<br>supply chains | Coefficient of variance<br>of the intensity |
|            |             |                                                                              |                                                          | tCO <sub>2</sub> eq/M-JPY                                        | tCO <sub>2</sub> eq/M-JPY                             | tCO <sub>2</sub> eq/M-JPY                           | tCO <sub>2</sub> eq/M-JPY                                      | %                                           |
| JD1        | 011101      | Rice                                                                         | 米                                                        | 1.55E-2                                                          | 0.00E+0                                               | 8.61E-3                                             | 6.86E-3                                                        | 1.24E+2                                     |
| JD2        | 011102      | Wheat, barley and the like                                                   | 麦類                                                       | 1.86E-2                                                          | 0.00E+0                                               | 9.32E-3                                             | 9.24E-3                                                        | 1.44E+2                                     |
| JD3        | 011201      | Potatoes and sweet potatoes                                                  | いも類                                                      | 1.54E-2                                                          | 0.00E+0                                               | 9.06E-3                                             | 6.34E-3                                                        | 1.19E+2                                     |
| JD4        | 011202      | Pulses                                                                       | 豆類                                                       | 1.86E-2                                                          | 0.00E+0                                               | 1.03E-2                                             | 8.31E-3                                                        | 1.27E+2                                     |
| JD5        | 011301      | Vegetables                                                                   | 野菜                                                       | 1.43E-2                                                          | 0.00E+0                                               | 8.47E-3                                             | 5.84E-3                                                        | 1.17E+2                                     |
| JD6        | 011401      | Fruits                                                                       | 果実                                                       | 1.11E-2                                                          | 0.00E+0                                               | 5.50E-3                                             | 5.62E-3                                                        | 1.39E+2                                     |
| JD7        | 011501      | Sugar crops                                                                  | 砂糖原料作物                                                   | 1.51E-2                                                          | 0.00E+0                                               | 8.49E-3                                             | 6.59E-3                                                        | 1.32E+2                                     |
| JD8        | 011502      | Crops for beverages                                                          | 飲料用作物                                                    | 1.49E-2                                                          | 0.00E+0                                               | 7.19E-3                                             | 7.74E-3                                                        | 1.55E+2                                     |
| JD9        | 011509      | Other edible crops                                                           | その他の食用耕種作物                                               | 1.51E-2                                                          | 0.00E+0                                               | 7.50E-3                                             | 7.57E-3                                                        | 1.41E+2                                     |
| JD10       | 011601      | Crops for feed and forage                                                    | 飼料作物                                                     | 1.64E-2                                                          | 0.00E+0                                               | 6.80E-3                                             | 9.57E-3                                                        | 1.74E+2                                     |
| JD11       | 011602      | Seeds and seedlings                                                          | 種苗                                                       | 1.15E-2                                                          | 0.00E+0                                               | 3.05E-3                                             | 8.40E-3                                                        | 3.54E+2                                     |
| JD12       | 011603      | Flowers and plants                                                           | 花き・花木類                                                   | 1.86E-2                                                          | 0.00E+0                                               | 9.44E-3                                             | 9.17E-3                                                        | 1.59E+2                                     |
| JD13       | 011609      | Other inedible crops                                                         | その他の非食用耕種作物                                              | 1.25E-2                                                          | 0.00E+0                                               | 8.22E-3                                             | 4.31E-3                                                        | 9.66E+1                                     |
| JD14       | 012101      | Dairy cattle farming                                                         | 酪農                                                       | 1.29E-2                                                          | 0.00E+0                                               | 4.49E-3                                             | 8.36E-3                                                        | 1.87E+2                                     |
| JD15       | 012102      | Hen eggs                                                                     | 鶏卵                                                       | 1.34E-2                                                          | 0.00E+0                                               | 5.88E-3                                             | 7.48E-3                                                        | 1.60E+2                                     |
| JD16       | 012103      | Fowls and broilers                                                           | 肉鶏                                                       | 1.58E-2                                                          | 0.00E+0                                               | 6.69E-3                                             | 9.16E-3                                                        | 1.64E+2                                     |
| JD17       | 012104      | Hogs                                                                         | 豚                                                        | 1.37E-2                                                          | 0.00E+0                                               | 5.69E-3                                             | 7.99E-3                                                        | 1.67E+2                                     |
| JD18       | 012105      | Beef cattle                                                                  | 肉用牛                                                      | 1.44E-2                                                          | 0.00E+0                                               | 6.23E-3                                             | 8.21E-3                                                        | 1.60E+2                                     |
| JD19       | 012109      | Other livestock                                                              | その他の畜産                                                   | 1.35E-2                                                          | 0.00E+0                                               | 5.53E-3                                             | 7.97E-3                                                        | 1.68E+2                                     |
| JD20       | 013101      | Veterinary service                                                           | 獣医学                                                      | 2.36E-2                                                          | 0.00E+0                                               | 7.30E-3                                             | 1.63E-2                                                        | 2.28E+2                                     |
| JD21       | 013102      | Agricultural services (except veterinary service)                            | 農業サービス (除獣医学)                                            | 1.64E-2                                                          | 0.00E+0                                               | 7.42E-3                                             | 8.93E-3                                                        | 1.57E+2                                     |
| JD22       | 021101      | Silviculture                                                                 | 育林                                                       | 4.88E-3                                                          | 0.00E+0                                               | 2.55E-3                                             | 2.33E-3                                                        | 1.37E+2                                     |
| JD23       | 021201      | Logs                                                                         | 素材                                                       | 1.47E-2                                                          | 0.00E+0                                               | 7.13E-3                                             | 7.53E-3                                                        | 1.46E+2                                     |
| JD24       | 021301      | Special forest products (inc. hunting)                                       | 特用林産物(含狩猟業)                                              | 2.41E-2                                                          | 0.00E+0                                               | 1.50E-2                                             | 9.08E-3                                                        | 1.09E+2                                     |
| JD25       | 031101      | Marine fisheries                                                             | 海面漁業                                                     | 1.43E-2                                                          | 0.00E+0                                               | 5.15E-3                                             | 9.19E-3                                                        | 2.20E+2                                     |
| JD26       | 031104      | Marine culture                                                               | 海面養殖業                                                    | 1.53E-2                                                          | 0.00E+0                                               | 6.67E-3                                             | 8.59E-3                                                        | 1.52E+2                                     |
| JD27       | 0312001     | Inland water fisheries and culture                                           | 内水面漁業・養殖業                                                | 1.26E-2                                                          | 0.00E+0                                               | 5.24E-3                                             | 7.32E-3                                                        | 1.55E+2                                     |
| JD28       | 061101      | Metallic ores                                                                | 金属鉱物                                                     | 2.93E-2                                                          | 0.00E+0                                               | 1.93E-2                                             | 1.00E-2                                                        | 9.63E+1                                     |
| JD29       | 062101      | Materials for ceramics                                                       | 窯業原料鉱物                                                   | 4.46E-2                                                          | 0.00E+0                                               | 3.34E-2                                             | 1.12E-2                                                        | 7.46E+1                                     |
| JD30       | 062201      | Gravel and quarrying                                                         | 砂利・採石                                                    | 7.41E-2                                                          | 0.00E+0                                               | 6.22E-2                                             | 1.19E-2                                                        | 4.94E+1                                     |
| JD31       | 062202      | Crushed stones                                                               | 砕石                                                       | 6.47E-2                                                          | 0.00E+0                                               | 5.44E-2                                             | 1.02E-2                                                        | 4.93E+1                                     |
| JD32       | 062909      | Other non-metallic ores                                                      | その他の非金属鉱物                                                | 4.67E-2                                                          | 0.00E+0                                               | 3.18E-2                                             | 1.49E-2                                                        | 9.60E+1                                     |
| JD33       | 071101      | Coal mining, crude petroleum and natural gas                                 | 石炭・原油・天然ガス                                               | 1.45E-2                                                          | 0.00E+0                                               | 6.55E-3                                             | 7.91E-3                                                        | 1.56E+2                                     |
| JD34       | 0711011     | Coal mining                                                                  | 石炭                                                       | 1.45E-2                                                          | 0.00E+0                                               | 6.55E-3                                             | 7.91E-3                                                        | 1.56E+2                                     |
| JD35       | 0711012     | Crude petroleum                                                              | 原油                                                       | 1.45E-2                                                          | 0.00E+0                                               | 6.55E-3                                             | 7.91E-3                                                        | 1.56E+2                                     |
| JD36       | 0711013     | Natural gas                                                                  | 天然ガス                                                     | 1.45E-2                                                          | 0.00E+0                                               | 6.55E-3                                             | 7.91E-3                                                        | 1.56E+2                                     |
| JD37       | 111101      | Slaughtering and meat processing                                             | と畜(含肉鶏処理)                                                | 1.36E-2                                                          | 0.00E+0                                               | 5.99E-3                                             | 7.60E-3                                                        | 1.58E+2                                     |
| JD38       | 111201      | Processed meat products                                                      | 肉加工品                                                     | 1.66E-2                                                          | 0.00E+0                                               | 2.60E-3                                             | 1.40E-2                                                        | 2.78E+2                                     |
| JD39       | 111202      | Bottled or canned meat products                                              | 畜産びん・かん詰                                                 | 1.08E-2                                                          | 0.00E+0                                               | 3.76E-3                                             | 7.07E-3                                                        | 1.83E+2                                     |
| JD40       | 111203      | Dairy farm products                                                          | 酪農品                                                      | 1.35E-2                                                          | 0.00E+0                                               | 5.22E-3                                             | 8.30E-3                                                        | 1.74E+2                                     |
| JD41       | 111301      | Frozen fish and shellfish                                                    | 冷凍魚介類                                                    | 1.23E-2                                                          | 0.00E+0                                               | 4.16E-3                                             | 8.11E-3                                                        | 1.74E+2                                     |
| JD42       | 111302      | Salted, dried or smoked seafood                                              | 塩・干・くん製品                                                 | 1.18E-2                                                          | 0.00E+0                                               | 3.37E-3                                             | 8.39E-3                                                        | 2.26E+2                                     |
| JD43       | 111303      | Bottled or canned seafood                                                    | 水産びん・かん詰                                                 | 1.08E-2                                                          | 0.00E+0                                               | 3.82E-3                                             | 7.00E-3                                                        | 1.82E+2                                     |
| JD44       | 111304      | Fish paste                                                                   | ねり製品                                                     | 1.21E-2                                                          | 0.00E+0                                               | 3.87E-3                                             | 8.20E-3                                                        | 1.95E+2                                     |
| JD45       | 111309      | Other processed seafood                                                      | その他の水産食品                                                 | 1.23E-2                                                          | 0.00E+0                                               | 5.40E-3                                             | 6.89E-3                                                        | 1.57E+2                                     |
| JD46       | 111401      | Grain milling                                                                | 精穀                                                       | 1.39E-2                                                          | 0.00E+0                                               | 7.74E-3                                             | 6.13E-3                                                        | 1.23E+2                                     |
| JD47       | 111402      | Flour and other grain milled products                                        | 製粉                                                       | 1.76E-2                                                          | 0.00E+0                                               | 6.53E-3                                             | 1.11E-2                                                        | 1.88E+2                                     |
| JD48       | 111501      | Noodles                                                                      | めん類                                                      | 1.45E-2                                                          | 0.00E+0                                               | 7.17E-3                                             | 7.32E-3                                                        | 1.39E+2                                     |
| JD49       | 111502      | Bread                                                                        | パン類                                                      | 1.02E-2                                                          | 0.00E+0                                               | 3.72E-3                                             | 6.49E-3                                                        | 1.76E+2                                     |
| JD50       | 111503      | Confectionery                                                                | 菓子類                                                      | 1.06E-2                                                          | 0.00E+0                                               | 3.56E-3                                             | 7.07E-3                                                        | 1.91E+2                                     |
| JD51       | 111601      | Bottled or canned vegetables and fruits                                      | 農産びん・かん詰                                                 | 1.26E-2                                                          | 0.00E+0                                               | 5.16E-3                                             | 7.43E-3                                                        | 1.58E+2                                     |
| JD52       | 111602      | Preserved agricultural foodstuffs (other than bottled or canned)             | 農産保存食料品(除びん・かん詰)                                         | 1.03E-2                                                          | 0.00E+0                                               | 5.21E-3                                             | 5.06E-3                                                        | 1.36E+2                                     |
| JD53       | 111701      | Sugar                                                                        | 砂糖                                                       | 1.47E-2                                                          | 0.00E+0                                               | 4.48E-3                                             | 1.02E-2                                                        | 2.34E+2                                     |
| JD54       | 111702      | Starch                                                                       | でん粉                                                      | 1.22E-2                                                          | 0.00E+0                                               | 3.17E-3                                             | 9.04E-3                                                        | 2.20E+2                                     |
| JD55       | 111703      | Dextrose, syrup and isomerized sugar                                         | ぶどう糖・水あめ・異性化糖                                            | 1.19E-2                                                          | 0.00E+0                                               | 3.19E-3                                             | 8.69E-3                                                        | 2.05E+2                                     |
| JD56       | 111704      | Vegetable oils and meal                                                      | 植物油脂                                                     | 1.53E-2                                                          | 0.00E+0                                               | 4.50E-3                                             | 1.08E-2                                                        | 2.26E+2                                     |
| JD57       | 111705      | Animal oils and fats                                                         | 動物油脂                                                     | 1.51E-2                                                          | 0.00E+0                                               | 6.46E-3                                             | 8.65E-3                                                        | 1.60E+2                                     |
| JD58       | 111706      | Condiments and seasonings                                                    | 調味料                                                      | 1.39E-2                                                          | 0.00E+0                                               | 7.09E-3                                             | 6.77E-3                                                        | 1.37E+2                                     |
| JD59       | 111901      | Prepared frozen foods                                                        | 冷凍調理食品                                                   | 1.28E-2                                                          | 0.00E+0                                               | 4.55E-3                                             | 8.20E-3                                                        | 1.73E+2                                     |
| JD60       | 111902      | Retort foods                                                                 | レトルト食品                                                   | 1.28E-2                                                          | 0.00E+0                                               | 4.57E-3                                             | 8.27E-3                                                        | 1.68E+2                                     |
| JD61       | 111903      | Dishes, sushi and lunch boxes                                                | そう菜・すし・弁当                                                | 1.35E-2                                                          | 0.00E+0                                               | 6.48E-3                                             | 7.06E-3                                                        | 1.37E+2                                     |
| JD62       | 111904      | School lunch (public) **                                                     | 学校給食(国公立)★★                                              | 9.08E-3                                                          | 0.00E+0                                               | 4.00E-3                                             | 5.08E-3                                                        | 1.47E+2                                     |
| JD63       | 111905      | School lunch (private) *                                                     | 学校給食(私立)★                                                | 9.20E-3                                                          | 0.00E+0                                               | 3.61E-3                                             | 5.59E-3                                                        | 1.59E+2                                     |
| JD64       | 111909      | Other foods                                                                  | その他の食料品                                                  | 1.27E-2                                                          | 0.00E+0                                               | 5.52E-3                                             | 7.23E-3                                                        | 1.55E+2                                     |
| JD65       | 112101      | Refined sake                                                                 | 清酒                                                       | 8.45E-3                                                          | 0.00E+0                                               | 4.10E-3                                             | 4.35E-3                                                        | 1.43E+2                                     |
| JD66       | 112102      | Beer                                                                         | ビール                                                      | 5.92E-3                                                          | 0.00E+0                                               | 3.05E-3                                             | 2.86E-3                                                        | 1.36E+2                                     |
| JD67       | 112103      | Whiskey and brandy                                                           | ウイスキー類                                                   | 7.21E-3                                                          | 0.00E+0                                               | 3.15E-3                                             | 4.06E-3                                                        | 1.60E+2                                     |
| JD68       | 112109      | Other liquors                                                                | その他の酒類                                                   | 8.67E-3                                                          | 0.00E+0                                               | 3.66E-3                                             | 5.01E-3                                                        | 1.63E+2                                     |
| JD69       | 112901      | Tea and roasted coffee                                                       | 茶・コーヒー                                                   | 1.33E-2                                                          | 0.00E+0                                               | 4.66E-3                                             | 8.64E-3                                                        | 3.27E+2                                     |
| JD70       | 112902      | Soft drinks                                                                  | 清涼飲料                                                     | 1.28E-2                                                          | 0.00E+0                                               | 6.79E-3                                             | 5.97E-3                                                        | 1.30E+2                                     |
| JD71       | 112903      | Manufactured ice                                                             | 製氷                                                       | 2.67E-2                                                          | 0.00E+0                                               | 8.58E-3                                             | 1.81E-2                                                        | 2.08E+2                                     |
| JD72       | 113101      | Animal feed                                                                  | 飼料                                                       | 1.26E-2                                                          | 0.00E+0                                               | 3.11E-3                                             | 9.46E-3                                                        | 2.27E+2                                     |
| JD73       | 113102      | Organic fertilizers, n.e.c.                                                  | 有機質肥料(除別掲)                                               | 9.86E-3                                                          | 0.00E+0                                               | 3.58E-3                                             | 6.28E-3                                                        | 1.74E+2                                     |
| JD74       | 114101      | Tobacco                                                                      | たばこ                                                      | 3.68E-3                                                          | 0.00E+0                                               | 1.70E-3                                             | 1.98E-3                                                        | 1.50E+2                                     |
| JD75       | 151101      | Fiber yarns                                                                  | 紡績糸                                                      | 1.37E-2                                                          | 0.00E+0                                               | 4.93E-3                                             | 8.76E-3                                                        | 1.95E+2                                     |
| JD76       | 151201      | Cotton and staple fiber fabrics (inc. fabrics of synthetic spun fibers)      | 綿・スフ織物(含合繊短繊維織物)                                         | 1.29E-2                                                          | 0.00E+0                                               | 4.44E-3                                             | 8.43E-3                                                        | 2.12E+2                                     |
| JD77       | 151202      | Silk and artificial silk fabrics (inc. fabrics of synthetic filament fibers) | 絹・人絹織物(含合繊長繊維織物)                                         | 1.66E-2                                                          | 0.00E+0                                               | 7.50E-3                                             | 9.08E-3                                                        | 1.60E+2                                     |
| JD78       | 151203      | Woolen fabrics, hemp fabrics and other fabrics                               | 毛織物・麻織物・その他の織物                                           | 1.27E-2                                                          | 0.00E+0                                               | 4.55E-3                                             | 8.12E-3                                                        | 1.92E+2                                     |
| JD79       | 151301      | Knitting fabrics                                                             | ニット生地                                                    | 1.17E-2                                                          | 0.00E+0                                               | 4.78E-3                                             | 6.94E-3                                                        | 1.86E+2                                     |
| JD80       | 151401      | Yarn and fabric dyeing and finishing (processing on commission only)         | 染色整理                                                     | 1.35E-2                                                          | 0.00E+0                                               | 3.04E-3                                             | 1.05E-2                                                        | 2.31E+2                                     |
| JD81       | 151901      | Ropes and nets                                                               | 綱・網                                                      | 2.05E-2                                                          | 0.00E+0                                               | 1.20E-2                                             | 8.41E-3                                                        | 1.19E+2                                     |
| JD82       | 151902      | Carpets and floor mats                                                       | じゅうたん・床敷物                                                | 1.71E-2                                                          | 0.00E+0                                               | 7.69E-3                                             | 9.41E-3                                                        | 1.60E+2                                     |
| JD83       | 151903      | Fabricated textiles for medical use                                          | 繊維製衛生材料                                                  | 1.10E-2                                                          | 0.00E+0                                               | 4.74E-3                                             | 6.25E-3                                                        | 1.61E+2                                     |
| JD84       | 151909      | Other fabricated textile products                                            | その他の繊維工業製品                                               | 1.70E-2                                                          | 0.00E+0                                               | 8.11E-3                                             | 8.90E-3                                                        | 1.52E+2                                     |
| JD85       | 152101      | Woven fabric apparel                                                         | 織物製衣服                                                    | 1.15E-2                                                          | 0.00E+0                                               | 3.76E-3                                             | 7.75E-3                                                        | 1.95E+2                                     |
| JD86       | 152102      | Knitted apparel                                                              | ニット製衣服                                                   | 1.26E-2                                                          | 0.00E+0                                               | 5.63E-3                                             | 6.98E-3                                                        | 1.58E+2                                     |
| JD87       | 152209      | Other wearing apparel and clothing accessories                               | その他の衣服・身の回り品                                             | 1.27E-2                                                          | 0.00E+0                                               | 5.25E-3                                             | 7.41E-3                                                        | 1.69E+2                                     |
| JD88       | 152901      | Bedding                                                                      | 寝具                                                       | 1.09E-2                                                          | 0.00E+0                                               | 3.47E-3                                             | 7.48E-3                                                        | 1.95E+2                                     |
| JD89       | 152909      | Other ready-made textile products                                            | その他の繊維既製品                                                | 1.19E-2                                                          | 0.00E+0                                               | 5.71E-3                                             | 6.19E-3                                                        | 1.51E+2                                     |
| JD90       | 161101      | Timber                                                                       | 製材                                                       | 2.40E-2                                                          | 0.00E+0                                               | 6.59E-3                                             | 1.75E-2                                                        | 3.01E+2                                     |
| JD91       | 161102      | Plywood                                                                      | 合板                                                       | 2.22E-2                                                          | 0.00E+0                                               | 6.93E-3                                             | 1.52E-2                                                        | 2.21E+2                                     |
| JD92       | 161103      | Wooden chips                                                                 | 木材チップ                                                    | 1.64E-2                                                          | 0.00E+0                                               | 7.09E-3                                             | 9.32E-3                                                        | 1.57E+2                                     |

Table A7: Embodied global HFCs intensities of Japanese goods and services based on producer price in 2005 [2/5]

| Sector no. | Sector code | Sector name<br>[Japanese domestic commodity]                | Sector name in Japanese<br>[Japanese domestic commodity] | Embodied global HFCs intensities based on producer price in 2005 |                                                       |                                                     |                                                                |                                             |
|------------|-------------|-------------------------------------------------------------|----------------------------------------------------------|------------------------------------------------------------------|-------------------------------------------------------|-----------------------------------------------------|----------------------------------------------------------------|---------------------------------------------|
|            |             |                                                             |                                                          | Total                                                            | (D) Direct emissions<br>in Japan during<br>production | (S) Induced<br>emissions in Japan<br>through supply | (F) Induced emissions<br>in foreign country's<br>supply chains | Coefficient of variance<br>of the intensity |
|            |             |                                                             |                                                          | tCO <sub>2</sub> eq/M-JPY                                        | tCO <sub>2</sub> eq/M-JPY                             | tCO <sub>2</sub> eq/M-JPY                           | tCO <sub>2</sub> eq/M-JPY                                      | %                                           |
| JD93       | 161909      | Other wooden products                                       | その他の木製品                                                  | 1.72E-2                                                          | 0.00E+0                                               | 8.46E-3                                             | 8.79E-3                                                        | 1.41E+2                                     |
| JD94       | 171101      | Wooden furniture and fixtures                               | 木製家具・装備品                                                 | 1.46E-2                                                          | 0.00E+0                                               | 7.87E-3                                             | 6.74E-3                                                        | 1.26E+2                                     |
| JD95       | 171102      | Wooden fixtures                                             | 木製建具                                                     | 1.33E-2                                                          | 0.00E+0                                               | 6.89E-3                                             | 6.45E-3                                                        | 1.33E+2                                     |
| JD96       | 171103      | Metallic furniture and fixture                              | 金属製家具・装備品                                                | 1.58E-2                                                          | 0.00E+0                                               | 8.30E-3                                             | 7.50E-3                                                        | 1.32E+2                                     |
| JD97       | 181101      | Pulp                                                        | パルプ                                                      | 1.83E-2                                                          | 0.00E+0                                               | 2.81E-3                                             | 1.55E-2                                                        | 3.62E+2                                     |
| JD98       | 181201      | Paper                                                       | 洋紙・和紙                                                    | 1.37E-2                                                          | 0.00E+0                                               | 2.99E-3                                             | 1.07E-2                                                        | 2.33E+2                                     |
| JD99       | 181202      | Paperboard                                                  | 板紙                                                       | 1.69E-2                                                          | 0.00E+0                                               | 6.12E-3                                             | 1.08E-2                                                        | 1.93E+2                                     |
| JD100      | 181301      | Corrugated cardboard                                        | 段ボール                                                     | 1.38E-2                                                          | 0.00E+0                                               | 5.58E-3                                             | 8.20E-3                                                        | 1.67E+2                                     |
| JD101      | 181302      | Coated paper and building<br>(construction) paper           | 塗工紙・建設用加工紙                                               | 1.66E-2                                                          | 0.00E+0                                               | 9.20E-3                                             | 7.37E-3                                                        | 1.23E+2                                     |
| JD102      | 182101      | Corrugated card board boxes                                 | 段ボール箱                                                    | 9.23E-3                                                          | 0.00E+0                                               | 4.18E-3                                             | 5.05E-3                                                        | 1.51E+2                                     |
| JD103      | 182109      | Other paper containers                                      | その他の紙製容器                                                 | 1.11E-2                                                          | 0.00E+0                                               | 4.05E-3                                             | 7.01E-3                                                        | 1.74E+2                                     |
| JD104      | 182901      | Paper textile for medical use                               | 紙製衛生材料・用品                                                | 1.80E-2                                                          | 0.00E+0                                               | 1.02E-2                                             | 7.82E-3                                                        | 1.20E+2                                     |
| JD105      | 182909      | Other pulp, paper and processed paper<br>products           | その他のパルプ・紙・紙加工品                                           | 1.23E-2                                                          | 0.00E+0                                               | 6.70E-3                                             | 5.58E-3                                                        | 1.27E+2                                     |
| JD106      | 191101      | Printing, plate making and book binding                     | 印刷・製版・製本                                                 | 9.72E-3                                                          | 0.00E+0                                               | 5.16E-3                                             | 4.56E-3                                                        | 1.29E+2                                     |
| JD107      | 201101      | Chemical fertilizer                                         | 化学肥料                                                     | 2.31E-2                                                          | 0.00E+0                                               | 2.99E-3                                             | 2.01E-2                                                        | 3.22E+2                                     |
| JD108      | 202101      | Industrial soda chemicals                                   | ソーダ工業製品                                                  | 1.79E-2                                                          | 0.00E+0                                               | 3.78E-3                                             | 1.42E-2                                                        | 2.38E+2                                     |
| JD109      | 202901      | Inorganic pigment                                           | 無機顔料                                                     | 1.81E-2                                                          | 0.00E+0                                               | 3.63E-3                                             | 1.44E-2                                                        | 2.29E+2                                     |
| JD110      | 202902      | Compressed gas and liquefied gas                            | 圧縮ガス・液化ガス                                                | 1.76E-2                                                          | 0.00E+0                                               | 4.19E-3                                             | 1.34E-2                                                        | 2.13E+2                                     |
| JD111      | 202903      | Salt                                                        | 塩                                                        | 1.92E-2                                                          | 0.00E+0                                               | 5.04E-3                                             | 1.42E-2                                                        | 2.28E+2                                     |
| JD112      | 202909      | Other industrial inorganic chemicals                        | その他の無機化学工業製品                                             | 1.85E-2                                                          | 0.00E+0                                               | 3.65E-3                                             | 1.48E-2                                                        | 2.19E+2                                     |
| JD113      | 203101      | Petrochemical basic products                                | 石油化学基礎製品                                                 | 5.04E-2                                                          | 0.00E+0                                               | 1.41E-3                                             | 4.90E-2                                                        | 3.83E+2                                     |
| JD114      | 203102      | Petrochemical aromatic products<br>(except synthetic resin) | 石油化学系芳香族製品                                               | 4.37E-2                                                          | 0.00E+0                                               | 1.71E-3                                             | 4.20E-2                                                        | 3.72E+2                                     |
| JD115      | 203201      | Aliphatic intermediates                                     | 脂肪族中間物                                                   | 3.40E-2                                                          | 0.00E+0                                               | 3.42E-3                                             | 3.06E-2                                                        | 3.01E+2                                     |
| JD116      | 203202      | Cyclic intermediates                                        | 環状中間物                                                    | 3.29E-2                                                          | 0.00E+0                                               | 2.35E-3                                             | 3.05E-2                                                        | 2.99E+2                                     |
| JD117      | 203301      | Synthetic rubber                                            | 合成ゴム                                                     | 2.73E-2                                                          | 0.00E+0                                               | 3.56E-3                                             | 2.37E-2                                                        | 2.77E+2                                     |
| JD118      | 203901      | Methane derivatives                                         | メタン誘導品                                                   | 2.00E-2                                                          | 0.00E+0                                               | 3.78E-3                                             | 1.62E-2                                                        | 2.38E+2                                     |
| JD119      | 203902      | Oil and fat industrial chemicals                            | 油脂加工製品                                                   | 1.22E-2                                                          | 0.00E+0                                               | 3.25E-3                                             | 8.95E-3                                                        | 2.07E+2                                     |
| JD120      | 203903      | Plasticizers                                                | 可塑剤                                                      | 1.95E-2                                                          | 0.00E+0                                               | 2.48E-3                                             | 1.71E-2                                                        | 2.59E+2                                     |
| JD121      | 203904      | Synthetic dyes                                              | 合成染料                                                     | 1.83E-2                                                          | 0.00E+0                                               | 1.70E-3                                             | 1.66E-2                                                        | 2.98E+2                                     |
| JD122      | 203909      | Other industrial organic chemicals                          | その他の有機化学工業製品                                             | 1.69E-2                                                          | 0.00E+0                                               | 3.20E-3                                             | 1.37E-2                                                        | 2.31E+2                                     |
| JD123      | 204101      | Thermo-setting resins                                       | 熱硬化性樹脂                                                   | 2.26E-2                                                          | 0.00E+0                                               | 2.92E-3                                             | 1.97E-2                                                        | 2.65E+2                                     |
| JD124      | 204102      | Thermoplastics resins                                       | 熱可塑性樹脂                                                   | 3.19E-2                                                          | 0.00E+0                                               | 2.95E-3                                             | 2.90E-2                                                        | 3.17E+2                                     |
| JD125      | 204103      | High function resins                                        | 高機能性樹脂                                                   | 2.45E-2                                                          | 0.00E+0                                               | 3.22E-3                                             | 2.13E-2                                                        | 2.71E+2                                     |
| JD126      | 204109      | Other resins                                                | その他の合成樹脂                                                 | 9.26E-1                                                          | 9.04E-1                                               | 2.64E-3                                             | 2.00E-2                                                        | 6.55E+0                                     |
| JD127      | 205101      | Rayon and acetate                                           | レーヨン・アセテート                                               | 5.00E-2                                                          | 0.00E+0                                               | 3.68E-2                                             | 1.32E-2                                                        | 7.22E+1                                     |
| JD128      | 205102      | Synthetic fibers                                            | 合成繊維                                                     | 3.66E-2                                                          | 0.00E+0                                               | 2.05E-2                                             | 1.60E-2                                                        | 1.30E+2                                     |
| JD129      | 206101      | Medicaments                                                 | 医薬品                                                      | 4.91E-2                                                          | 3.61E-2                                               | 5.48E-3                                             | 7.51E-3                                                        | 4.35E+1                                     |
| JD130      | 207101      | Soap, synthetic detergents and surface<br>active agents     | 石けん・合成洗剤・界面活性剤                                           | 1.62E-2                                                          | 0.00E+0                                               | 5.45E-3                                             | 1.08E-2                                                        | 1.94E+2                                     |
| JD131      | 207102      | Cosmetics, toilet preparations and<br>dentifrices           | 化粧品・歯磨                                                   | 6.23E-1                                                          | 6.01E-1                                               | 1.46E-2                                             | 7.79E-3                                                        | 3.55E+0                                     |
| JD132      | 207201      | Paint and varnishes                                         | 塗料                                                       | 2.12E-1                                                          | 1.91E-1                                               | 7.92E-3                                             | 1.35E-2                                                        | 1.82E+1                                     |
| JD133      | 207202      | Printing ink                                                | 印刷インキ                                                    | 3.44E-2                                                          | 0.00E+0                                               | 2.20E-2                                             | 1.24E-2                                                        | 1.04E+2                                     |
| JD134      | 207301      | Photographic sensitive materials                            | 写真感光材料                                                   | 1.76E-2                                                          | 0.00E+0                                               | 6.80E-3                                             | 1.08E-2                                                        | 1.68E+2                                     |
| JD135      | 207401      | Agricultural chemicals                                      | 農薬                                                       | 1.53E-2                                                          | 0.00E+0                                               | 4.75E-3                                             | 1.06E-2                                                        | 1.94E+2                                     |
| JD136      | 207901      | Gelatin and adhesives                                       | ゼラチン・接着剤                                                 | 2.02E-2                                                          | 0.00E+0                                               | 8.03E-3                                             | 1.22E-2                                                        | 1.69E+2                                     |
| JD137      | 207909      | Other final chemical products                               | その他の化学最終製品                                               | 2.05E-2                                                          | 0.00E+0                                               | 7.23E-3                                             | 1.32E-2                                                        | 1.83E+2                                     |
| JD138      | 211101      | Petroleum refinery products (inc.<br>greases)               | 石油製品                                                     | 5.35E-2                                                          | 0.00E+0                                               | 5.04E-4                                             | 5.30E-2                                                        | 4.33E+2                                     |
| JD139      | 212101      | Coal products                                               | 石炭製品                                                     | 2.67E-2                                                          | 0.00E+0                                               | 1.20E-3                                             | 2.55E-2                                                        | 4.24E+2                                     |
| JD140      | 212102      | Paving materials                                            | 舗装材料                                                     | 2.39E-2                                                          | 0.00E+0                                               | 5.91E-3                                             | 1.80E-2                                                        | 2.67E+2                                     |
| JD141      | 221101      | Plastic products                                            | プラスチック製品                                                 | 6.76E-2                                                          | 3.44E-2                                               | 2.24E-2                                             | 1.08E-2                                                        | 4.60E+1                                     |
| JD142      | 231101      | Tires and inner tubes                                       | タイヤ・チューブ                                                 | 1.42E-2                                                          | 0.00E+0                                               | 3.00E-3                                             | 1.12E-2                                                        | 2.23E+2                                     |
| JD143      | 231901      | Rubber footwear                                             | ゴム製履物                                                    | 8.99E-3                                                          | 0.00E+0                                               | 3.97E-3                                             | 5.02E-3                                                        | 1.58E+2                                     |
| JD144      | 231902      | Plastic footwear                                            | プラスチック製履物                                                | 1.43E-2                                                          | 0.00E+0                                               | 8.55E-3                                             | 5.78E-3                                                        | 1.14E+2                                     |
| JD145      | 231909      | Other rubber products                                       | その他のゴム製品                                                 | 1.45E-2                                                          | 0.00E+0                                               | 5.75E-3                                             | 8.72E-3                                                        | 1.69E+2                                     |
| JD146      | 241101      | Leather footwear                                            | 革製履物                                                     | 1.08E-2                                                          | 0.00E+0                                               | 4.05E-3                                             | 6.72E-3                                                        | 1.77E+2                                     |
| JD147      | 241201      | Leather and fur skins                                       | 製革・毛皮                                                    | 1.75E-2                                                          | 0.00E+0                                               | 3.24E-3                                             | 1.42E-2                                                        | 2.35E+2                                     |
| JD148      | 241202      | Miscellaneous leather products                              | かばん・袋物・その他の革製品                                           | 1.54E-2                                                          | 0.00E+0                                               | 8.12E-3                                             | 7.27E-3                                                        | 1.29E+2                                     |
| JD149      | 251101      | Sheet glass and safety glass                                | 板ガラス・安全ガラス                                               | 1.42E-2                                                          | 0.00E+0                                               | 5.39E-3                                             | 8.77E-3                                                        | 1.72E+2                                     |
| JD150      | 251201      | Glass fiber and glass fiber products,<br>n.e.c.             | ガラス繊維・同製品                                                | 1.97E-2                                                          | 0.00E+0                                               | 8.05E-3                                             | 1.17E-2                                                        | 1.66E+2                                     |
| JD151      | 251909      | Other glass products                                        | その他のガラス製品                                                | 1.42E-2                                                          | 0.00E+0                                               | 4.70E-3                                             | 9.50E-3                                                        | 1.84E+2                                     |
| JD152      | 252101      | Cement                                                      | セメント                                                     | 2.14E-2                                                          | 0.00E+0                                               | 8.90E-3                                             | 1.25E-2                                                        | 1.67E+2                                     |
| JD153      | 252201      | Ready mixed concrete                                        | 生コンクリート                                                  | 2.87E-2                                                          | 0.00E+0                                               | 2.02E-2                                             | 8.48E-3                                                        | 8.27E+1                                     |
| JD154      | 252301      | Cement products                                             | セメント製品                                                   | 1.41E-2                                                          | 0.00E+0                                               | 6.81E-3                                             | 7.30E-3                                                        | 1.43E+2                                     |
| JD155      | 253101      | Pottery, china and earthenware                              | 陶磁器                                                      | 1.24E-2                                                          | 0.00E+0                                               | 3.23E-3                                             | 9.21E-3                                                        | 2.04E+2                                     |
| JD156      | 259901      | Clay refractories                                           | 耐火物                                                      | 1.64E-2                                                          | 0.00E+0                                               | 4.59E-3                                             | 1.18E-2                                                        | 1.93E+2                                     |
| JD157      | 259902      | Other structural clay products                              | その他の建設用土石製品                                              | 1.43E-2                                                          | 0.00E+0                                               | 5.63E-3                                             | 8.72E-3                                                        | 1.81E+2                                     |
| JD158      | 259903      | Carbon and graphite products                                | 炭素・黒鉛製品                                                  | 1.60E-2                                                          | 0.00E+0                                               | 4.24E-3                                             | 1.18E-2                                                        | 2.07E+2                                     |
| JD159      | 259904      | Abrasive                                                    | 研磨材                                                      | 1.23E-2                                                          | 0.00E+0                                               | 3.18E-3                                             | 9.10E-3                                                        | 2.01E+2                                     |
| JD160      | 259909      | Miscellaneous ceramic, stone and clay<br>products           | その他の窯業・土石製品                                              | 1.54E-2                                                          | 0.00E+0                                               | 6.46E-3                                             | 8.91E-3                                                        | 1.61E+2                                     |
| JD161      | 261101      | Pig iron                                                    | 鉄鉄                                                       | 2.23E-2                                                          | 0.00E+0                                               | 1.20E-3                                             | 2.11E-2                                                        | 4.65E+2                                     |
| JD162      | 261102      | Ferro alloys                                                | フェロアロイ                                                   | 2.11E-2                                                          | 0.00E+0                                               | 2.41E-3                                             | 1.87E-2                                                        | 3.45E+2                                     |
| JD163      | 261103      | Crude steel (converters)                                    | 粗鋼(転炉)                                                   | 1.84E-2                                                          | 0.00E+0                                               | 2.09E-3                                             | 1.63E-2                                                        | 3.58E+2                                     |
| JD164      | 261104      | Crude steel (electric furnaces)                             | 粗鋼(電気炉)                                                  | 1.21E-2                                                          | 0.00E+0                                               | 2.09E-3                                             | 9.96E-3                                                        | 2.47E+2                                     |
| JD165      | 261201      | Scrap iron                                                  | 鉄屑                                                       | 0.00E+0                                                          | 0.00E+0                                               | 0.00E+0                                             | 0.00E+0                                                        | 0.00E+0                                     |
| JD166      | 262101      | Hot rolled steel                                            | 熱間圧延鋼材                                                   | 1.36E-2                                                          | 0.00E+0                                               | 2.29E-3                                             | 1.13E-2                                                        | 2.92E+2                                     |
| JD167      | 262201      | Steel pipes and tubes                                       | 鋼管                                                       | 1.18E-2                                                          | 0.00E+0                                               | 2.80E-3                                             | 8.98E-3                                                        | 2.40E+2                                     |
| JD168      | 262301      | Cold-finished steel                                         | 冷間仕上げ鋼材                                                  | 1.33E-2                                                          | 0.00E+0                                               | 2.74E-3                                             | 1.06E-2                                                        | 2.50E+2                                     |
| JD169      | 262302      | Coated steel                                                | めっき鋼材                                                    | 1.35E-2                                                          | 0.00E+0                                               | 3.86E-3                                             | 9.60E-3                                                        | 2.12E+2                                     |
| JD170      | 263101      | Cast and forged steel                                       | 鑄鍛鋼                                                      | 1.13E-2                                                          | 0.00E+0                                               | 2.47E-3                                             | 8.82E-3                                                        | 2.24E+2                                     |
| JD171      | 263102      | Cast iron pipes and tubes                                   | 鑄鉄管                                                      | 1.09E-2                                                          | 0.00E+0                                               | 3.27E-3                                             | 7.68E-3                                                        | 1.96E+2                                     |
| JD172      | 263103      | Cast and forged materials (iron)                            | 鑄鉄品及び鍛工品(鉄)                                              | 1.40E-2                                                          | 0.00E+0                                               | 3.68E-3                                             | 1.03E-2                                                        | 2.10E+2                                     |
| JD173      | 264901      | Iron and steel shearing and slitting                        | 鉄鋼シャースリット業                                               | 1.12E-2                                                          | 0.00E+0                                               | 3.18E-3                                             | 8.02E-3                                                        | 2.18E+2                                     |
| JD174      | 264909      | Other iron or steel products                                | その他の鉄鋼製品                                                 | 9.06E-3                                                          | 0.00E+0                                               | 2.64E-3                                             | 6.42E-3                                                        | 2.07E+2                                     |
| JD175      | 271101      | Copper                                                      | 銅                                                        | 3.01E-2                                                          | 0.00E+0                                               | 1.62E-3                                             | 2.85E-2                                                        | 5.55E+2                                     |
| JD176      | 271102      | Lead and zinc (inc. regenerated lead)                       | 鉛・亜鉛(含再生)                                                | 2.03E-2                                                          | 0.00E+0                                               | 2.11E-3                                             | 1.82E-2                                                        | 4.09E+2                                     |
| JD177      | 271103      | Aluminum (inc. regenerated aluminum)                        | アルミニウム(含再生)                                              | 2.43E-2                                                          | 0.00E+0                                               | 3.76E-3                                             | 2.05E-2                                                        | 2.45E+2                                     |
| JD178      | 271109      | Other non-ferrous metals                                    | その他の非鉄金属地金                                               | 2.56E-2                                                          | 0.00E+0                                               | 1.52E-3                                             | 2.41E-2                                                        | 5.19E+2                                     |
| JD179      | 271201      | Non-ferrous metal scrap                                     | 非鉄金属屑                                                    | 0.00E+0                                                          | 0.00E+0                                               | 0.00E+0                                             | 0.00E+0                                                        | 0.00E+0                                     |
| JD180      | 272101      | Electric wires and cables                                   | 電線・ケーブル                                                  | 2.12E-2                                                          | 0.00E+0                                               | 5.67E-3                                             | 1.55E-2                                                        | 2.73E+2                                     |
| JD181      | 272102      | Optical fiber cables                                        | 光ファイバケーブル                                                | 1.37E-1                                                          | 0.00E+0                                               | 1.23E-2                                             | 1.25E-1                                                        | 3.22E+2                                     |
| JD182      | 272201      | Rolled and drawn copper and copper<br>alloys                | 伸銅品                                                      | 2.33E-2                                                          | 0.00E+0                                               | 2.28E-3                                             | 2.10E-2                                                        | 3.53E+2                                     |
| JD183      | 272202      | Rolled and drawn aluminum                                   | アルミ圧延製品                                                  | 3.65E-2                                                          | 0.00E+0                                               | 2.43E-3                                             | 3.41E-2                                                        | 3.71E+2                                     |

Table A7: Embodied global HFCs intensities of Japanese goods and services based on producer price in 2005 [3/5]

| Sector no. | Sector code | Sector name<br>[Japanese domestic commodity]               | Sector name in Japanese<br>[Japanese domestic commodity] | Embodied global HFCs intensities based on producer price in 2005 |                                                       |                                                     |                                                                |                                             |
|------------|-------------|------------------------------------------------------------|----------------------------------------------------------|------------------------------------------------------------------|-------------------------------------------------------|-----------------------------------------------------|----------------------------------------------------------------|---------------------------------------------|
|            |             |                                                            |                                                          | Total                                                            | (D) Direct emissions<br>in Japan during<br>production | (S) Induced<br>emissions in Japan<br>through supply | (F) Induced emissions<br>in foreign country's<br>supply chains | Coefficient of variance<br>of the intensity |
|            |             |                                                            |                                                          | tCO <sub>2</sub> eq/M-JPY                                        | tCO <sub>2</sub> eq/M-JPY                             | tCO <sub>2</sub> eq/M-JPY                           | tCO <sub>2</sub> eq/M-JPY                                      | %                                           |
| JD184      | 272203      | Non-ferrous metal castings and forgings                    | 非鉄金属素形材                                                  | 2.52E-2                                                          | 0.00E+0                                               | 3.38E-3                                             | 2.18E-2                                                        | 2.66E+2                                     |
| JD185      | 272204      | Nuclear fuels                                              | 核燃料                                                      | 1.82E-2                                                          | 0.00E+0                                               | 6.42E-4                                             | 1.75E-2                                                        | 4.10E+2                                     |
| JD186      | 272209      | Other non-ferrous metal products                           | その他の非鉄金属製品                                               | 5.36E-2                                                          | 0.00E+0                                               | 2.42E-3                                             | 5.12E-2                                                        | 3.92E+2                                     |
| JD187      | 281101      | Metal products for construction                            | 建設用金属製品                                                  | 1.60E-2                                                          | 0.00E+0                                               | 6.30E-3                                             | 9.74E-3                                                        | 1.74E+2                                     |
| JD188      | 281201      | Metal products for architecture                            | 建築用金属製品                                                  | 1.48E-2                                                          | 0.00E+0                                               | 3.97E-3                                             | 1.08E-2                                                        | 2.20E+2                                     |
| JD189      | 289101      | Gas and oil appliances and heating and cooking apparatus   | ガス・石油機器及び暖房機器                                            | 2.65E-2                                                          | 0.00E+0                                               | 6.50E-3                                             | 2.00E-2                                                        | 2.15E+2                                     |
| JD190      | 289901      | Bolts, nuts, rivets and springs                            | ボルト・ナット・リベット及びスプリング                                      | 1.13E-2                                                          | 0.00E+0                                               | 3.49E-3                                             | 7.77E-3                                                        | 1.99E+2                                     |
| JD191      | 289902      | Metal containers, fabricated plate and sheet metal         | 金属製容器及び製缶板金製品                                            | 1.21E-2                                                          | 0.00E+0                                               | 5.61E-3                                             | 6.52E-3                                                        | 1.49E+2                                     |
| JD192      | 289903      | Plumber's supplies, powder metallurgy products and tools   | 配管工事付属品・粉末冶金製品・道具類                                       | 1.43E-2                                                          | 0.00E+0                                               | 3.55E-3                                             | 1.07E-2                                                        | 2.31E+2                                     |
| JD193      | 289909      | Other metal products                                       | その他の金属製品                                                 | 1.03E-2                                                          | 0.00E+0                                               | 3.48E-3                                             | 6.79E-3                                                        | 1.85E+2                                     |
| JD194      | 301101      | Boilers                                                    | ボイラ                                                      | 1.29E-2                                                          | 0.00E+0                                               | 3.61E-3                                             | 9.30E-3                                                        | 2.21E+2                                     |
| JD195      | 301102      | Turbines                                                   | タービン                                                     | 2.85E-2                                                          | 0.00E+0                                               | 3.39E-3                                             | 2.51E-2                                                        | 2.90E+2                                     |
| JD196      | 301103      | Engines                                                    | 原動機                                                      | 2.51E-2                                                          | 0.00E+0                                               | 3.87E-3                                             | 2.12E-2                                                        | 2.59E+2                                     |
| JD197      | 301201      | Conveyors                                                  | 運搬機械                                                     | 9.92E-2                                                          | 0.00E+0                                               | 5.31E-3                                             | 9.38E-2                                                        | 3.24E+2                                     |
| JD198      | 301301      | Refrigerators and air conditioning apparatus               | 冷凍機・温湿調整装置                                               | 3.57E+0                                                          | 2.99E+0                                               | 3.57E-1                                             | 2.15E-1                                                        | 2.16E+1                                     |
| JD199      | 301901      | Pumps and compressors                                      | ポンプ及び圧縮機                                                 | 8.19E-2                                                          | 0.00E+0                                               | 3.66E-3                                             | 7.82E-2                                                        | 3.35E+2                                     |
| JD200      | 301902      | Machinists' precision tools                                | 機械工具                                                     | 1.81E-2                                                          | 0.00E+0                                               | 3.42E-3                                             | 1.46E-2                                                        | 2.47E+2                                     |
| JD201      | 301909      | Other general industrial machinery and equipment           | その他の一般産業機械及び装置                                           | 2.99E-2                                                          | 0.00E+0                                               | 1.01E-2                                             | 1.98E-2                                                        | 2.13E+2                                     |
| JD202      | 302101      | Machinery and equipment for construction and mining        | 建設・鉱山機械                                                  | 2.36E-2                                                          | 0.00E+0                                               | 3.97E-3                                             | 1.96E-2                                                        | 2.61E+2                                     |
| JD203      | 302201      | Chemical machinery                                         | 化学機械                                                     | 2.26E-2                                                          | 0.00E+0                                               | 4.71E-3                                             | 1.79E-2                                                        | 2.46E+2                                     |
| JD204      | 302301      | Industrial robots                                          | 産業用ロボット                                                  | 1.00E-1                                                          | 0.00E+0                                               | 5.84E-3                                             | 9.43E-2                                                        | 3.18E+2                                     |
| JD205      | 302401      | Metal machine tools                                        | 金属工作機械                                                   | 4.20E-2                                                          | 0.00E+0                                               | 3.99E-3                                             | 3.80E-2                                                        | 2.90E+2                                     |
| JD206      | 302402      | Metal processing machinery                                 | 金属加工機械                                                   | 1.61E-2                                                          | 0.00E+0                                               | 3.77E-3                                             | 1.23E-2                                                        | 2.44E+2                                     |
| JD207      | 302901      | Machinery for agricultural use                             | 農業用機械                                                    | 1.85E-2                                                          | 0.00E+0                                               | 4.51E-3                                             | 1.40E-2                                                        | 2.31E+2                                     |
| JD208      | 302902      | Textile machinery                                          | 繊維機械                                                     | 3.15E-2                                                          | 0.00E+0                                               | 4.14E-3                                             | 2.74E-2                                                        | 3.04E+2                                     |
| JD209      | 302903      | Food processing machinery and equipment                    | 食品機械・同装置                                                 | 3.23E-2                                                          | 0.00E+0                                               | 3.67E-3                                             | 2.86E-2                                                        | 2.92E+2                                     |
| JD210      | 302904      | Semiconductor making equipment                             | 半導体製造装置                                                  | 5.97E-2                                                          | 0.00E+0                                               | 3.01E-2                                             | 2.96E-2                                                        | 1.71E+2                                     |
| JD211      | 302905      | Vacuum equipment and vacuum component                      | 真空装置・真空機器                                                | 6.18E-2                                                          | 0.00E+0                                               | 4.72E-3                                             | 5.71E-2                                                        | 3.21E+2                                     |
| JD212      | 302909      | Other special machinery for industrial use                 | その他の特殊産業用機械                                              | 4.29E-2                                                          | 0.00E+0                                               | 8.99E-3                                             | 3.39E-2                                                        | 2.58E+2                                     |
| JD213      | 303101      | Metal molds                                                | 金型                                                       | 8.55E-3                                                          | 0.00E+0                                               | 2.76E-3                                             | 5.79E-3                                                        | 1.90E+2                                     |
| JD214      | 303102      | Bearings                                                   | ベアリング                                                    | 1.24E-2                                                          | 0.00E+0                                               | 3.15E-3                                             | 9.25E-3                                                        | 2.21E+2                                     |
| JD215      | 303109      | Other general machines and parts                           | その他の一般機械器具及び部品                                           | 2.16E-2                                                          | 5.45E-3                                               | 4.08E-3                                             | 1.21E-2                                                        | 1.63E+2                                     |
| JD216      | 311101      | Copy machine                                               | 複写機                                                      | 2.79E-1                                                          | 0.00E+0                                               | 7.84E-3                                             | 2.72E-1                                                        | 3.32E+2                                     |
| JD217      | 311109      | Other office machines                                      | その他の事務用機械                                                | 2.30E-1                                                          | 0.00E+0                                               | 7.87E-3                                             | 2.22E-1                                                        | 3.34E+2                                     |
| JD218      | 311201      | Machinery for service industry                             | サービス用機器                                                  | 2.88E-1                                                          | 1.87E-2                                               | 1.20E-1                                             | 1.49E-1                                                        | 1.74E+2                                     |
| JD219      | 321101      | Rotating electrical equipment                              | 回転電気機械                                                   | 1.51E-1                                                          | 0.00E+0                                               | 5.16E-3                                             | 1.46E-1                                                        | 3.18E+2                                     |
| JD220      | 321102      | Transformers and reactors                                  | 変圧器・変成器                                                  | 1.09E-1                                                          | 0.00E+0                                               | 4.87E-3                                             | 1.04E-1                                                        | 3.36E+2                                     |
| JD221      | 321103      | Relay switches and switchboards                            | 開閉制御装置及び配電盤                                              | 1.59E-1                                                          | 0.00E+0                                               | 6.62E-3                                             | 1.52E-1                                                        | 3.16E+2                                     |
| JD222      | 321104      | Wiring devices and supplies                                | 配線器具                                                     | 3.89E-1                                                          | 0.00E+0                                               | 5.81E-3                                             | 3.83E-1                                                        | 3.59E+2                                     |
| JD223      | 321105      | Electrical equipment for internal combustion engines       | 内燃機関電装品                                                  | 8.76E-2                                                          | 0.00E+0                                               | 5.27E-3                                             | 8.23E-2                                                        | 3.20E+2                                     |
| JD224      | 321109      | Other electrical devices and parts                         | その他の産業用電気機器                                              | 1.48E-1                                                          | 0.00E+0                                               | 6.12E-3                                             | 1.42E-1                                                        | 3.17E+2                                     |
| JD225      | 322101      | Applied electronic equipment                               | 電子応用装置                                                   | 4.66E-1                                                          | 0.00E+0                                               | 5.63E-3                                             | 4.60E-1                                                        | 3.35E+2                                     |
| JD226      | 323101      | Electric measuring instruments                             | 電気計測器                                                    | 4.27E-1                                                          | 0.00E+0                                               | 5.02E-3                                             | 4.22E-1                                                        | 3.42E+2                                     |
| JD227      | 324101      | Electric bulbs                                             | 電球類                                                      | 2.90E-1                                                          | 0.00E+0                                               | 4.40E-3                                             | 2.86E-1                                                        | 3.78E+2                                     |
| JD228      | 324102      | Electric lighting fixtures and apparatus                   | 電気照明器具                                                   | 6.19E-1                                                          | 0.00E+0                                               | 1.26E-2                                             | 6.06E-1                                                        | 4.21E+2                                     |
| JD229      | 324103      | Batteries                                                  | 電池                                                       | 7.87E-2                                                          | 0.00E+0                                               | 8.17E-3                                             | 7.05E-2                                                        | 2.91E+2                                     |
| JD230      | 324109      | Other electrical devices and parts                         | その他の電気機械器具                                               | 9.54E-2                                                          | 0.00E+0                                               | 6.63E-3                                             | 8.88E-2                                                        | 3.19E+2                                     |
| JD231      | 325101      | Household air-conditioners                                 | 民生用エアコンディショナ                                             | 5.57E-1                                                          | 1.93E-1                                               | 1.90E-1                                             | 1.74E-1                                                        | 1.04E+2                                     |
| JD232      | 325102      | Household electric appliances (except air-conditioners)    | 民生用電気機器(除エアコン)                                           | 2.41E-1                                                          | 0.00E+0                                               | 3.99E-2                                             | 2.01E-1                                                        | 2.85E+2                                     |
| JD233      | 331101      | Video recording and playback equipment                     | ビデオ機器                                                    | 3.02E-1                                                          | 0.00E+0                                               | 6.77E-3                                             | 2.95E-1                                                        | 3.33E+2                                     |
| JD234      | 331102      | Electric audio equipment                                   | 電気音響機器                                                   | 2.87E-1                                                          | 0.00E+0                                               | 7.18E-3                                             | 2.80E-1                                                        | 3.19E+2                                     |
| JD235      | 331103      | Radio and television sets                                  | ラジオ・テレビ受信機                                               | 2.69E-1                                                          | 0.00E+0                                               | 7.39E-3                                             | 2.62E-1                                                        | 3.29E+2                                     |
| JD236      | 332101      | Wired communication equipment                              | 有線電気通信機器                                                 | 2.16E-1                                                          | 0.00E+0                                               | 6.98E-3                                             | 2.09E-1                                                        | 3.12E+2                                     |
| JD237      | 332102      | Cellular phones                                            | 携帯電話機                                                    | 2.81E-1                                                          | 0.00E+0                                               | 8.38E-3                                             | 2.73E-1                                                        | 3.23E+2                                     |
| JD238      | 332103      | Radio communication equipment (except cellular phones)     | 無線電気通信機器(除携帯電話機)                                         | 2.81E-1                                                          | 0.00E+0                                               | 7.98E-3                                             | 2.73E-1                                                        | 3.14E+2                                     |
| JD239      | 332109      | Other communication equipment                              | その他の電気通信機器                                               | 2.14E-1                                                          | 0.00E+0                                               | 5.40E-3                                             | 2.09E-1                                                        | 3.12E+2                                     |
| JD240      | 333101      | Personal Computers                                         | パーソナルコンピュータ                                              | 4.37E-1                                                          | 0.00E+0                                               | 6.32E-3                                             | 4.31E-1                                                        | 3.36E+2                                     |
| JD241      | 333102      | Electronic computing equipment (except personal computers) | 電子計算機本体(除パソコン)                                           | 4.14E-1                                                          | 0.00E+0                                               | 5.11E-3                                             | 4.09E-1                                                        | 3.37E+2                                     |
| JD242      | 333103      | Electronic computing equipment (accessory equipment)       | 電子計算機付属装置                                                | 3.31E-1                                                          | 0.00E+0                                               | 6.42E-3                                             | 3.24E-1                                                        | 3.34E+2                                     |
| JD243      | 341101      | Semiconductor devices                                      | 半導体素子                                                    | 2.29E-1                                                          | 1.29E-1                                               | 4.77E-3                                             | 9.51E-2                                                        | 1.42E+2                                     |
| JD244      | 341102      | Integrated circuits                                        | 集積回路                                                     | 2.13E-1                                                          | 1.52E-1                                               | 6.44E-3                                             | 2.07E-1                                                        | 3.20E+2                                     |
| JD245      | 342101      | Electron tubes                                             | 電子管                                                      | 3.63E-2                                                          | 0.00E+0                                               | 3.45E-3                                             | 3.29E-2                                                        | 2.79E+2                                     |
| JD246      | 342102      | Liquid crystal element                                     | 液晶素子                                                     | 3.96E-1                                                          | 2.19E-3                                               | 7.36E-3                                             | 3.87E-1                                                        | 3.39E+2                                     |
| JD247      | 342103      | Magnetic tapes and discs                                   | 磁気テープ・磁気ディスク                                             | 2.54E-2                                                          | 0.00E+0                                               | 1.53E-2                                             | 1.01E-2                                                        | 1.12E+2                                     |
| JD248      | 342109      | Other electronic components                                | その他の電子部品                                                 | 1.99E-1                                                          | 0.00E+0                                               | 4.16E-3                                             | 1.95E-1                                                        | 3.07E+2                                     |
| JD249      | 351101      | Passenger motor cars                                       | 乗用車                                                      | 4.49E-2                                                          | 0.00E+0                                               | 1.02E-2                                             | 3.47E-2                                                        | 2.44E+2                                     |
| JD250      | 352101      | Trucks, buses and other cars                               | トラック・バス・その他の自動車                                          | 4.09E-2                                                          | 0.00E+0                                               | 1.07E-2                                             | 3.02E-2                                                        | 2.30E+2                                     |
| JD251      | 353101      | Two-wheel motor vehicles                                   | 二輪自動車                                                    | 4.67E-2                                                          | 0.00E+0                                               | 9.81E-3                                             | 3.69E-2                                                        | 2.58E+2                                     |
| JD252      | 354101      | Motor vehicle bodies                                       | 自動車車体                                                    | 3.46E-2                                                          | 0.00E+0                                               | 1.66E-2                                             | 1.80E-2                                                        | 1.59E+2                                     |
| JD253      | 354102      | Internal combustion engines for motor vehicles and parts   | 自動車用内燃機関・同部分品                                            | 4.04E-2                                                          | 0.00E+0                                               | 4.69E-3                                             | 3.57E-2                                                        | 2.89E+2                                     |
| JD254      | 354103      | Motor vehicle parts and accessories                        | 自動車部品                                                    | 3.59E-2                                                          | 3.32E-3                                               | 9.42E-3                                             | 2.32E-2                                                        | 1.96E+2                                     |
| JD255      | 361101      | Steel ships                                                | 鋼船                                                       | 4.92E-2                                                          | 0.00E+0                                               | 1.85E-2                                             | 3.07E-2                                                        | 1.94E+2                                     |
| JD256      | 361102      | Ships (except steel ships)                                 | その他の船舶                                                   | 4.13E-2                                                          | 0.00E+0                                               | 7.33E-3                                             | 3.39E-2                                                        | 2.72E+2                                     |
| JD257      | 361103      | Internal combustion engines for vessels                    | 船用内燃機関                                                   | 2.41E-2                                                          | 0.00E+0                                               | 4.09E-3                                             | 2.00E-2                                                        | 2.62E+2                                     |
| JD258      | 361110      | Repair of ships                                            | 船舶修理                                                     | 2.39E-2                                                          | 0.00E+0                                               | 1.12E-2                                             | 1.27E-2                                                        | 1.62E+2                                     |
| JD259      | 362101      | Rolling stock                                              | 鉄道車両                                                     | 4.40E-2                                                          | 0.00E+0                                               | 2.05E-2                                             | 2.34E-2                                                        | 1.61E+2                                     |
| JD260      | 362110      | Repair of rolling stock                                    | 鉄道車両修理                                                   | 2.49E-2                                                          | 0.00E+0                                               | 1.04E-2                                             | 1.46E-2                                                        | 1.66E+2                                     |
| JD261      | 362201      | Aircrafts                                                  | 航空機                                                      | 3.52E-2                                                          | 0.00E+0                                               | 4.59E-3                                             | 3.06E-2                                                        | 3.03E+2                                     |
| JD262      | 362210      | Repair of aircrafts                                        | 航空機修理                                                    | 8.21E-2                                                          | 0.00E+0                                               | 2.17E-3                                             | 8.00E-2                                                        | 3.82E+2                                     |
| JD263      | 362901      | Bicycles                                                   | 自転車                                                      | 2.18E-2                                                          | 0.00E+0                                               | 2.63E-3                                             | 1.92E-2                                                        | 2.73E+2                                     |
| JD264      | 362909      | Other transport equipment                                  | その他の輸送機械                                                 | 1.89E-2                                                          | 0.00E+0                                               | 4.99E-3                                             | 1.39E-2                                                        | 2.21E+2                                     |
| JD265      | 371101      | Camera                                                     | カメラ                                                      | 2.58E-1                                                          | 0.00E+0                                               | 7.89E-3                                             | 2.51E-1                                                        | 3.32E+2                                     |
| JD266      | 371109      | Other photographic and optical instruments                 | その他の光学機械                                                 | 5.71E-2                                                          | 0.00E+0                                               | 5.15E-3                                             | 5.19E-2                                                        | 4.25E+2                                     |

Table A7: Embodied global HFCs intensities of Japanese goods and services based on producer price in 2005 [4/5]

| Sector no. | Sector code | Sector name<br>[Japanese domestic commodity]                   | Sector name in Japanese<br>[Japanese domestic commodity] | Embodied global HFCs intensities based on producer price in 2005 |                                                       |                                                     |                                                                |                                             |
|------------|-------------|----------------------------------------------------------------|----------------------------------------------------------|------------------------------------------------------------------|-------------------------------------------------------|-----------------------------------------------------|----------------------------------------------------------------|---------------------------------------------|
|            |             |                                                                |                                                          | Total                                                            | (D) Direct emissions<br>in Japan during<br>production | (S) Induced<br>emissions in Japan<br>through supply | (F) Induced emissions<br>in foreign country's<br>supply chains | Coefficient of variance<br>of the intensity |
|            |             |                                                                |                                                          | tCO <sub>2</sub> eq/M-JPY                                        | tCO <sub>2</sub> eq/M-JPY                             | tCO <sub>2</sub> eq/M-JPY                           | tCO <sub>2</sub> eq/M-JPY                                      | %                                           |
| JD267      | 371201      | Watches and clocks                                             | 時計                                                       | 7.72E-2                                                          | 0.00E+0                                               | 5.91E-3                                             | 7.13E-2                                                        | 3.08E+2                                     |
| JD268      | 371901      | Professional and scientific instruments                        | 理化学機械器具                                                  | 2.52E-2                                                          | 0.00E+0                                               | 4.64E-3                                             | 2.05E-2                                                        | 2.54E+2                                     |
| JD269      | 371902      | Analytical instruments, testing machine, measuring instruments | 分析器・試験機・計量器・測定器                                          | 1.19E-1                                                          | 0.00E+0                                               | 5.11E-3                                             | 1.14E-1                                                        | 3.16E+2                                     |
| JD270      | 371903      | Medical instruments                                            | 医療用機械器具                                                  | 1.33E-1                                                          | 0.00E+0                                               | 9.56E-3                                             | 1.23E-1                                                        | 3.03E+2                                     |
| JD271      | 391101      | Toys and games                                                 | がん具                                                      | 1.42E-1                                                          | 0.00E+0                                               | 8.15E-3                                             | 1.33E-1                                                        | 3.21E+2                                     |
| JD272      | 391102      | Sporting and athletic goods                                    | 運動用品                                                     | 2.14E-2                                                          | 0.00E+0                                               | 1.24E-2                                             | 8.96E-3                                                        | 1.14E+2                                     |
| JD273      | 391901      | Musical instruments                                            | 楽器                                                       | 4.60E-2                                                          | 0.00E+0                                               | 8.16E-3                                             | 3.79E-2                                                        | 2.61E+2                                     |
| JD274      | 391902      | Audio and video records, other information recording media     | 情報記録物                                                    | 1.91E-2                                                          | 0.00E+0                                               | 1.30E-2                                             | 6.07E-3                                                        | 8.89E+1                                     |
| JD275      | 391903      | Stationery                                                     | 筆記具・文具                                                   | 1.61E-2                                                          | 0.00E+0                                               | 1.00E-2                                             | 6.08E-3                                                        | 1.05E+2                                     |
| JD276      | 391904      | Jewelry and adornments                                         | 身辺細貨品                                                    | 2.34E-2                                                          | 0.00E+0                                               | 7.95E-3                                             | 1.54E-2                                                        | 2.12E+2                                     |
| JD277      | 391905      | "Tatami" (straw matting) and straw products                    | 畳・わら加工品                                                  | 8.26E-3                                                          | 0.00E+0                                               | 4.52E-3                                             | 3.74E-3                                                        | 1.25E+2                                     |
| JD278      | 391906      | Ordnance                                                       | 武器                                                       | 2.96E-2                                                          | 0.00E+0                                               | 7.01E-3                                             | 2.26E-2                                                        | 2.22E+2                                     |
| JD279      | 391909      | Miscellaneous manufacturing products                           | その他の製造工業製品                                               | 2.10E-2                                                          | 0.00E+0                                               | 1.36E-2                                             | 7.38E-3                                                        | 9.53E+1                                     |
| JD280      | 392101      | Reuse and recycling                                            | 再生资源回収・加工処理                                              | 8.24E-3                                                          | 0.00E+0                                               | 3.98E-3                                             | 4.26E-3                                                        | 1.64E+2                                     |
| JD281      | 411101      | Residential construction (wooden)                              | 住宅建築(木造)                                                 | 1.88E-2                                                          | 0.00E+0                                               | 9.24E-3                                             | 9.52E-3                                                        | 1.44E+2                                     |
| JD282      | 411102      | Residential construction (non-wooden)                          | 住宅建築(非木造)                                                | 2.35E-2                                                          | 0.00E+0                                               | 1.23E-2                                             | 1.12E-2                                                        | 1.37E+2                                     |
| JD283      | 411201      | Non-residential construction (wooden)                          | 非住宅建築(木造)                                                | 4.68E-2                                                          | 0.00E+0                                               | 3.36E-2                                             | 1.32E-2                                                        | 8.40E+1                                     |
| JD284      | 411202      | Non-residential construction (non-wooden)                      | 非住宅建築(非木造)                                               | 4.37E-2                                                          | 0.00E+0                                               | 3.03E-2                                             | 1.34E-2                                                        | 9.17E+1                                     |
| JD285      | 412101      | Repair of construction                                         | 建設補修                                                     | 1.97E-2                                                          | 0.00E+0                                               | 8.13E-3                                             | 1.16E-2                                                        | 1.73E+2                                     |
| JD286      | 413101      | Public construction of roads                                   | 道路関係公共事業                                                 | 1.46E-2                                                          | 0.00E+0                                               | 7.90E-3                                             | 6.70E-3                                                        | 1.30E+2                                     |
| JD287      | 413102      | Public construction of rivers, drainages and others            | 河川・下水道・その他の公共事業                                          | 2.45E-2                                                          | 0.00E+0                                               | 1.25E-2                                             | 1.20E-2                                                        | 1.43E+2                                     |
| JD288      | 413103      | Agricultural public construction                               | 農林関係公共事業                                                 | 1.69E-2                                                          | 0.00E+0                                               | 1.01E-2                                             | 6.79E-3                                                        | 1.12E+2                                     |
| JD289      | 413201      | Railway construction                                           | 鉄道軌道建設                                                   | 1.64E-2                                                          | 0.00E+0                                               | 7.01E-3                                             | 9.35E-3                                                        | 1.63E+2                                     |
| JD290      | 413202      | Electric power facilities construction                         | 電力施設建設                                                   | 2.47E-2                                                          | 0.00E+0                                               | 7.11E-3                                             | 1.76E-2                                                        | 2.22E+2                                     |
| JD291      | 413203      | Telecommunication facilities construction                      | 電気通信施設建設                                                 | 8.41E-2                                                          | 0.00E+0                                               | 8.01E-3                                             | 7.61E-2                                                        | 3.19E+2                                     |
| JD292      | 413209      | Other civil engineering and construction                       | その他の土木建設                                                 | 1.82E-2                                                          | 0.00E+0                                               | 8.51E-3                                             | 9.72E-3                                                        | 1.54E+2                                     |
| JD293      | 5111001     | Electricity                                                    | 事業用電力                                                    | 2.05E-2                                                          | 0.00E+0                                               | 3.94E-3                                             | 1.66E-2                                                        | 2.30E+2                                     |
| JD294      | 511104      | On-site power generation                                       | 自家発電                                                     | 1.79E-2                                                          | 0.00E+0                                               | 2.97E-3                                             | 1.49E-2                                                        | 2.58E+2                                     |
| JD295      | 512101      | Gas supply                                                     | 都市ガス                                                     | 1.29E-2                                                          | 0.00E+0                                               | 2.28E-3                                             | 1.06E-2                                                        | 3.13E+2                                     |
| JD296      | 512201      | Steam and hot water supply                                     | 熱供給業                                                     | 1.80E-2                                                          | 0.00E+0                                               | 4.14E-3                                             | 1.39E-2                                                        | 2.20E+2                                     |
| JD297      | 521101      | Water supply                                                   | 上水道・簡易水道                                                 | 7.88E-3                                                          | 0.00E+0                                               | 3.88E-3                                             | 4.00E-3                                                        | 1.49E+2                                     |
| JD298      | 521102      | Industrial water supply                                        | 工業用水                                                     | 9.00E-3                                                          | 0.00E+0                                               | 2.76E-3                                             | 6.24E-3                                                        | 2.10E+2                                     |
| JD299      | 521103      | Sewage disposal **                                             | 下水道★★                                                    | 2.93E-2                                                          | 0.00E+0                                               | 9.32E-3                                             | 2.00E-2                                                        | 1.98E+2                                     |
| JD300      | 521201      | Waste management services (public) **                          | 廃棄物処理(公営)★★                                              | 1.56E-2                                                          | 0.00E+0                                               | 8.14E-3                                             | 7.46E-3                                                        | 1.36E+2                                     |
| JD301      | 521202      | Waste management services (private)                            | 廃棄物処理(産業)                                                | 9.73E-3                                                          | 0.00E+0                                               | 4.62E-3                                             | 5.11E-3                                                        | 1.50E+2                                     |
| JD302      | 611101      | Wholesale trade                                                | 卸売                                                       | 8.54E-3                                                          | 0.00E+0                                               | 5.43E-3                                             | 3.10E-3                                                        | 1.03E+2                                     |
| JD303      | 611201      | Retail trade                                                   | 小売                                                       | 9.23E-3                                                          | 0.00E+0                                               | 5.70E-3                                             | 3.52E-3                                                        | 1.09E+2                                     |
| JD304      | 621101      | Financial service                                              | 金融                                                       | 6.09E-3                                                          | 0.00E+0                                               | 1.90E-3                                             | 4.19E-3                                                        | 2.26E+2                                     |
| JD305      | 621201      | Life insurance                                                 | 生命保険                                                     | 5.39E-3                                                          | 0.00E+0                                               | 2.34E-3                                             | 3.05E-3                                                        | 1.67E+2                                     |
| JD306      | 621202      | Non-life insurance                                             | 損害保険                                                     | 3.90E-3                                                          | 0.00E+0                                               | 1.41E-3                                             | 2.49E-3                                                        | 1.95E+2                                     |
| JD307      | 641101      | Real estate agencies and managers                              | 不動産仲介・管理業                                                | 4.29E-3                                                          | 0.00E+0                                               | 1.70E-3                                             | 2.59E-3                                                        | 1.71E+2                                     |
| JD308      | 641102      | Real estate rental service                                     | 不動産賃貸業                                                   | 2.79E-3                                                          | 0.00E+0                                               | 1.24E-3                                             | 1.55E-3                                                        | 1.55E+2                                     |
| JD309      | 642101      | House rent                                                     | 住宅賃貸料                                                    | 3.09E-3                                                          | 0.00E+0                                               | 1.38E-3                                             | 1.70E-3                                                        | 1.55E+2                                     |
| JD310      | 642201      | House rent (imputed house rent)                                | 住宅賃貸料(帰属家賃)                                              | 1.48E-3                                                          | 0.00E+0                                               | 6.14E-4                                             | 8.63E-4                                                        | 1.67E+2                                     |
| JD311      | 711101      | Railway transport (passengers)                                 | 鉄道旅客輸送                                                   | 6.36E-3                                                          | 0.00E+0                                               | 2.15E-3                                             | 4.21E-3                                                        | 1.84E+2                                     |
| JD312      | 711201      | Railway transport (freight)                                    | 鉄道貨物輸送                                                   | 9.14E-3                                                          | 0.00E+0                                               | 2.88E-3                                             | 6.26E-3                                                        | 1.91E+2                                     |
| JD313      | 712101      | Bus transport service                                          | バス                                                       | 9.21E-3                                                          | 2.02E-3                                               | 1.43E-3                                             | 5.77E-3                                                        | 2.05E+2                                     |
| JD314      | 712102      | Hired car and taxi transport                                   | ハイヤー・タクシー                                                | 1.19E-2                                                          | 5.35E-3                                               | 1.11E-3                                             | 5.45E-3                                                        | 1.56E+2                                     |
| JD315      | 712201      | Road freight transport(except Self-transport by private cars)  | 道路貨物輸送(除自家輸送)                                            | 1.25E-2                                                          | 4.96E-3                                               | 1.41E-3                                             | 6.17E-3                                                        | 1.73E+2                                     |
| JD316      | 713101      | Self-transport by private cars (passengers)                    | 自家輸送(旅客自動車)                                              | 1.37E-1                                                          | 1.12E-1                                               | 3.26E-3                                             | 2.21E-2                                                        | 6.06E+1                                     |
| JD317      | 713201      | Self-transport by private cars (freight)                       | 自家輸送(貨物自動車)                                              | 2.00E-1                                                          | 1.77E-1                                               | 3.26E-3                                             | 1.99E-2                                                        | 3.64E+1                                     |
| JD318      | 714101      | Ocean transport                                                | 外洋輸送                                                     | 7.03E-2                                                          | 0.00E+0                                               | 9.90E-4                                             | 6.93E-2                                                        | 3.92E+2                                     |
| JD319      | 714201      | Coastal and inland water transport                             | 沿海・内水面輸送                                                 | 1.29E-2                                                          | 0.00E+0                                               | 2.79E-3                                             | 1.01E-2                                                        | 2.75E+2                                     |
| JD320      | 714301      | Harbor transport service                                       | 港湾運送                                                     | 4.81E-3                                                          | 0.00E+0                                               | 1.60E-3                                             | 3.21E-3                                                        | 1.90E+2                                     |
| JD321      | 715101      | Air transport                                                  | 航空輸送                                                     | 2.37E-2                                                          | 0.00E+0                                               | 2.81E-3                                             | 2.09E-2                                                        | 2.45E+2                                     |
| JD322      | 716101      | Consigned freight forwarding                                   | 貨物利用運送                                                   | 6.16E-3                                                          | 0.00E+0                                               | 1.84E-3                                             | 4.32E-3                                                        | 1.99E+2                                     |
| JD323      | 717101      | Storage facility service                                       | 倉庫                                                       | 6.59E-3                                                          | 0.00E+0                                               | 2.33E-3                                             | 4.26E-3                                                        | 1.86E+2                                     |
| JD324      | 718101      | Packing service                                                | こん包                                                      | 9.84E-3                                                          | 0.00E+0                                               | 5.59E-3                                             | 4.25E-3                                                        | 1.17E+2                                     |
| JD325      | 718901      | Facility service for road transport                            | 道路輸送施設提供                                                 | 4.62E-3                                                          | 0.00E+0                                               | 1.58E-3                                             | 3.05E-3                                                        | 1.89E+2                                     |
| JD326      | 718902      | Port and water traffic control **                              | 水運施設管理★★                                                 | 6.90E-3                                                          | 0.00E+0                                               | 2.47E-3                                             | 4.42E-3                                                        | 1.82E+2                                     |
| JD327      | 718903      | Services relating to water transport                           | その他の水運付帯サービス                                             | 3.02E-3                                                          | 0.00E+0                                               | 1.08E-3                                             | 1.94E-3                                                        | 1.82E+2                                     |
| JD328      | 718904      | Airport and air traffic control (public) **                    | 航空施設管理(国営)★★                                             | 1.48E-2                                                          | 0.00E+0                                               | 3.09E-3                                             | 1.17E-2                                                        | 2.39E+2                                     |
| JD329      | 718905      | Airport and air traffic control                                | 航空施設管理(産業)                                               | 1.05E-2                                                          | 0.00E+0                                               | 2.65E-3                                             | 7.88E-3                                                        | 2.21E+2                                     |
| JD330      | 718906      | Services relating to air transport                             | その他の航空付帯サービス                                             | 6.23E-3                                                          | 0.00E+0                                               | 1.81E-3                                             | 4.42E-3                                                        | 2.09E+2                                     |
| JD331      | 718909      | Travel agency and other services relating to transport         | 旅行・その他の運輸付帯サービス                                          | 6.14E-3                                                          | 0.00E+0                                               | 2.49E-3                                             | 3.64E-3                                                        | 1.79E+2                                     |
| JD332      | 731101      | Postal service*                                                | 郵便・信書便                                                   | 4.07E-3                                                          | 0.00E+0                                               | 1.97E-3                                             | 2.10E-3                                                        | 1.51E+2                                     |
| JD333      | 731201      | Fixed telecommunication                                        | 固定電気通信                                                   | 6.62E-3                                                          | 0.00E+0                                               | 2.19E-3                                             | 4.43E-3                                                        | 2.41E+2                                     |
| JD334      | 731202      | Mobile telecommunication                                       | 移動電気通信                                                   | 5.36E-3                                                          | 0.00E+0                                               | 1.93E-3                                             | 3.44E-3                                                        | 1.92E+2                                     |
| JD335      | 731203      | Other telecommunication                                        | その他の電気通信                                                 | 7.66E-3                                                          | 0.00E+0                                               | 2.49E-3                                             | 5.16E-3                                                        | 2.08E+2                                     |
| JD336      | 731909      | Other services relating to communication                       | その他の通信サービス                                               | 8.15E-3                                                          | 0.00E+0                                               | 2.60E-3                                             | 5.55E-3                                                        | 2.02E+2                                     |
| JD337      | 732101      | Public broadcasting                                            | 公共放送                                                     | 1.18E-2                                                          | 0.00E+0                                               | 4.04E-3                                             | 7.78E-3                                                        | 2.02E+2                                     |
| JD338      | 732102      | Private broadcasting                                           | 民間放送                                                     | 1.42E-2                                                          | 0.00E+0                                               | 4.52E-3                                             | 9.67E-3                                                        | 2.45E+2                                     |
| JD339      | 732103      | Cable broadcasting                                             | 有線放送                                                     | 8.95E-3                                                          | 0.00E+0                                               | 3.15E-3                                             | 5.80E-3                                                        | 1.97E+2                                     |
| JD340      | 733101      | Information services                                           | 情報サービス                                                   | 7.40E-3                                                          | 0.00E+0                                               | 3.38E-3                                             | 4.02E-3                                                        | 1.60E+2                                     |
| JD341      | 734101      | Internet based services                                        | インターネット附随サービス                                            | 7.64E-3                                                          | 0.00E+0                                               | 2.74E-3                                             | 4.90E-3                                                        | 1.93E+2                                     |
| JD342      | 735101      | Image information production and distribution industry         | 映像情報制作・配給業                                               | 3.16E-2                                                          | 0.00E+0                                               | 6.60E-3                                             | 2.50E-2                                                        | 3.44E+2                                     |
| JD343      | 735102      | Newspaper                                                      | 新聞                                                       | 9.00E-3                                                          | 0.00E+0                                               | 3.24E-3                                             | 5.76E-3                                                        | 1.81E+2                                     |
| JD344      | 735103      | Publication                                                    | 出版                                                       | 8.03E-3                                                          | 0.00E+0                                               | 3.52E-3                                             | 4.51E-3                                                        | 1.60E+2                                     |
| JD345      | 735104      | News syndicates and private detective agencies                 | ニュース供給・興信所                                               | 7.99E-3                                                          | 0.00E+0                                               | 3.06E-3                                             | 4.93E-3                                                        | 1.90E+2                                     |
| JD346      | 811101      | Public administration (central) **                             | 公務(中央)★★                                                 | 2.05E-2                                                          | 0.00E+0                                               | 3.09E-3                                             | 1.74E-2                                                        | 2.70E+2                                     |
| JD347      | 811201      | Public administration (local) **                               | 公務(地方)★★                                                 | 5.40E-3                                                          | 0.00E+0                                               | 2.62E-3                                             | 2.78E-3                                                        | 1.48E+2                                     |
| JD348      | 821101      | School education (public) **                                   | 学校教育(国公立)★★                                              | 2.42E-3                                                          | 0.00E+0                                               | 1.00E-3                                             | 1.42E-3                                                        | 1.70E+2                                     |
| JD349      | 821102      | School education (private) *                                   | 学校教育(私立)★                                                | 6.38E-3                                                          | 0.00E+0                                               | 2.66E-3                                             | 3.72E-3                                                        | 1.67E+2                                     |
| JD350      | 821301      | Social education (public) **                                   | 社会教育(国公立)★★                                              | 6.23E-3                                                          | 0.00E+0                                               | 2.63E-3                                             | 3.60E-3                                                        | 1.65E+2                                     |
| JD351      | 821302      | Social education (private, non-profit) *                       | 社会教育(非営利)★                                               | 1.17E-2                                                          | 0.00E+0                                               | 6.22E-3                                             | 5.44E-3                                                        | 1.32E+2                                     |
| JD352      | 821303      | Other educational and training institutions (public) **        | その他の教育訓練機関(国公立)★★                                        | 1.07E-2                                                          | 0.00E+0                                               | 3.86E-3                                             | 6.84E-3                                                        | 1.85E+2                                     |

Table A7: Embodied global HFCs intensities of Japanese goods and services based on producer price in 2005 [5/5]

| Sector no. | Sector code | Sector name<br>[Japanese domestic commodity]                                                | Sector name in Japanese<br>[Japanese domestic commodity] | Embodied global HFCs intensities based on producer price in 2005 |                                                       |                                                     |                                                                |                                             |
|------------|-------------|---------------------------------------------------------------------------------------------|----------------------------------------------------------|------------------------------------------------------------------|-------------------------------------------------------|-----------------------------------------------------|----------------------------------------------------------------|---------------------------------------------|
|            |             |                                                                                             |                                                          | Total                                                            | (D) Direct emissions<br>in Japan during<br>production | (S) Induced<br>emissions in Japan<br>through supply | (F) Induced emissions<br>in foreign country's<br>supply chains | Coefficient of variance<br>of the intensity |
|            |             |                                                                                             |                                                          | tCO <sub>2</sub> eq/M-JPY                                        | tCO <sub>2</sub> eq/M-JPY                             | tCO <sub>2</sub> eq/M-JPY                           | tCO <sub>2</sub> eq/M-JPY                                      | %                                           |
| JD353      | 821304      | Other educational and training institutions (profit-making)                                 | その他の教育訓練機関(産業)                                           | 8.07E-3                                                          | 0.00E+0                                               | 2.48E-3                                             | 5.59E-3                                                        | 2.02E+2                                     |
| JD354      | 822101      | Research institutes for natural science (public) **                                         | 自然科学研究機関(国公立)★★                                          | 1.12E-2                                                          | 0.00E+0                                               | 4.13E-3                                             | 7.02E-3                                                        | 1.79E+2                                     |
| JD355      | 822102      | Research institutes for cultural and social science (public) **                             | 人文科学研究機関(国公立)★★                                          | 1.12E-2                                                          | 0.00E+0                                               | 4.43E-3                                             | 6.73E-3                                                        | 1.74E+2                                     |
| JD356      | 822103      | Research institutes for natural sciences (private, non-profit) *                            | 自然科学研究機関(非営利)★                                           | 1.49E-2                                                          | 0.00E+0                                               | 5.44E-3                                             | 9.41E-3                                                        | 1.82E+2                                     |
| JD357      | 822104      | Research institutes for cultural and social science (private, non-profit) *                 | 人文科学研究機関(非営利)★                                           | 8.77E-3                                                          | 0.00E+0                                               | 4.18E-3                                             | 4.58E-3                                                        | 1.49E+2                                     |
| JD358      | 822105      | Research institutes for natural sciences (profit-making)                                    | 自然科学研究機関(産業)                                             | 1.85E-2                                                          | 0.00E+0                                               | 6.16E-3                                             | 1.24E-2                                                        | 1.90E+2                                     |
| JD359      | 822106      | Research institutes for cultural and social science (profit-making)                         | 人文科学研究機関(産業)                                             | 7.14E-3                                                          | 0.00E+0                                               | 2.89E-3                                             | 4.25E-3                                                        | 1.75E+2                                     |
| JD360      | 822201      | Research and development (intra-enterprise)                                                 | 企業内研究開発                                                  | 9.72E-3                                                          | 0.00E+0                                               | 3.26E-3                                             | 6.46E-3                                                        | 1.89E+2                                     |
| JD361      | 831101      | Medical service (public)                                                                    | 医療(国公立)                                                  | 1.08E-1                                                          | 5.48E-3                                               | 8.61E-3                                             | 9.37E-2                                                        | 3.03E+2                                     |
| JD362      | 831102      | Medical service (non-profit foundations, etc.)                                              | 医療(公益法人等)                                                | 6.28E-2                                                          | 5.49E-3                                               | 7.97E-3                                             | 4.93E-2                                                        | 2.71E+2                                     |
| JD363      | 831103      | Medical service (medical corporations, etc.)                                                | 医療(医療法人等)                                                | 9.31E-2                                                          | 6.22E-3                                               | 8.90E-3                                             | 7.80E-2                                                        | 2.92E+2                                     |
| JD364      | 831201      | Health and hygiene (public) **                                                              | 保健衛生(国公立)★★                                              | 6.19E-3                                                          | 0.00E+0                                               | 2.79E-3                                             | 3.40E-3                                                        | 1.57E+2                                     |
| JD365      | 831202      | Health and hygiene (profit-making)                                                          | 保健衛生(産業)                                                 | 1.09E-2                                                          | 0.00E+0                                               | 4.44E-3                                             | 6.49E-3                                                        | 1.76E+2                                     |
| JD366      | 831301      | Social insurance (public) **                                                                | 社会保険事業(国公立)★★                                            | 6.62E-3                                                          | 0.00E+0                                               | 2.45E-3                                             | 4.17E-3                                                        | 1.88E+2                                     |
| JD367      | 831302      | Social insurance (private, non-profit) *                                                    | 社会保険事業(非営利)★                                             | 6.60E-3                                                          | 0.00E+0                                               | 2.37E-3                                             | 4.23E-3                                                        | 1.89E+2                                     |
| JD368      | 831303      | Social welfare (public) **                                                                  | 社会福祉(国公立)★★                                              | 5.52E-3                                                          | 0.00E+0                                               | 2.41E-3                                             | 3.11E-3                                                        | 1.56E+2                                     |
| JD369      | 831304      | Social welfare (private, non-profit) *                                                      | 社会福祉(非営利)★                                               | 5.76E-3                                                          | 0.00E+0                                               | 2.81E-3                                             | 2.95E-3                                                        | 1.42E+2                                     |
| JD370      | 831305      | Social welfare (profit-making)                                                              | 社会福祉(産業)                                                 | 5.72E-3                                                          | 0.00E+0                                               | 2.68E-3                                             | 3.04E-3                                                        | 1.47E+2                                     |
| JD371      | 831401      | Nursing care (In-home)                                                                      | 介護(居宅)                                                   | 1.51E-2                                                          | 0.00E+0                                               | 2.66E-3                                             | 1.24E-2                                                        | 2.70E+2                                     |
| JD372      | 831402      | Nursing care (In-facility)                                                                  | 介護(施設)                                                   | 1.97E-2                                                          | 0.00E+0                                               | 2.68E-3                                             | 1.70E-2                                                        | 2.88E+2                                     |
| JD373      | 841101      | Private non-profit institutions serving enterprises                                         | 対企業民間非営利団体                                               | 8.53E-3                                                          | 0.00E+0                                               | 3.71E-3                                             | 4.82E-3                                                        | 1.63E+2                                     |
| JD374      | 841102      | Private non-profit institutions serving households, n.e.c. *                                | 対家計民間非営利団体(除別掲)★                                         | 6.45E-3                                                          | 0.00E+0                                               | 2.81E-3                                             | 3.64E-3                                                        | 1.63E+2                                     |
| JD375      | 851101      | Advertising services                                                                        | 広告                                                       | 1.12E-2                                                          | 0.00E+0                                               | 4.77E-3                                             | 6.39E-3                                                        | 1.91E+2                                     |
| JD376      | 851201      | Goods rental and leasing (except car rental)                                                | 物品賃貸業(除貸自動車)                                             | 2.31E-2                                                          | 0.00E+0                                               | 6.01E-3                                             | 1.71E-2                                                        | 2.34E+2                                     |
| JD377      | 851301      | Car rental and leasing                                                                      | 貸自動車業                                                    | 4.45E-3                                                          | 0.00E+0                                               | 1.88E-3                                             | 2.58E-3                                                        | 1.63E+2                                     |
| JD378      | 851410      | Repair of motor vehicles                                                                    | 自動車修理                                                    | 2.11E-2                                                          | 0.00E+0                                               | 7.83E-3                                             | 1.33E-2                                                        | 1.94E+2                                     |
| JD379      | 851510      | Repair of machine                                                                           | 機械修理                                                     | 1.67E-1                                                          | 0.00E+0                                               | 3.79E-2                                             | 1.30E-1                                                        | 2.50E+2                                     |
| JD380      | 851901      | Building maintenance services                                                               | 建物サービス                                                   | 5.41E-3                                                          | 0.00E+0                                               | 2.61E-3                                             | 2.79E-3                                                        | 1.49E+2                                     |
| JD381      | 851902      | Judicial, financial and accounting services                                                 | 法務・財務・会計サービス                                             | 3.76E-3                                                          | 0.00E+0                                               | 1.54E-3                                             | 2.22E-3                                                        | 1.75E+2                                     |
| JD382      | 851903      | Civil engineering and construction services                                                 | 土木建築サービス                                                 | 5.00E-3                                                          | 0.00E+0                                               | 2.10E-3                                             | 2.90E-3                                                        | 1.62E+2                                     |
| JD383      | 851904      | Worker dispatching services                                                                 | 労働者派遣サービス                                                | 7.58E-4                                                          | 0.00E+0                                               | 2.32E-4                                             | 5.26E-4                                                        | 2.03E+2                                     |
| JD384      | 851909      | Other business services                                                                     | その他の対事業所サービス                                             | 5.70E-3                                                          | 0.00E+0                                               | 2.38E-3                                             | 3.32E-3                                                        | 1.71E+2                                     |
| JD385      | 861101      | Movie theaters                                                                              | 映画館                                                      | 2.19E-2                                                          | 0.00E+0                                               | 5.12E-3                                             | 1.68E-2                                                        | 3.12E+2                                     |
| JD386      | 861102      | Performances (except otherwise classified), theatrical companies                            | 興行場(除別掲)・興行団                                             | 2.05E-2                                                          | 0.00E+0                                               | 1.66E-2                                             | 3.90E-3                                                        | 5.77E+1                                     |
| JD387      | 861103      | Amusement and recreation facilities                                                         | 遊戯場                                                      | 1.29E-2                                                          | 0.00E+0                                               | 6.06E-3                                             | 6.87E-3                                                        | 1.53E+2                                     |
| JD388      | 861104      | Stadiums and companies of bicycle, horse, motorcar and motorboat races                      | 競輪・競馬等の競走場・競技団                                           | 8.26E-3                                                          | 0.00E+0                                               | 4.21E-3                                             | 4.05E-3                                                        | 1.42E+2                                     |
| JD389      | 861105      | Sport facility service, public gardens and amusement parks                                  | スポーツ施設提供業・公園・遊園地                                         | 9.58E-3                                                          | 0.00E+0                                               | 4.78E-3                                             | 4.80E-3                                                        | 1.45E+2                                     |
| JD390      | 861109      | Other amusement and recreation services                                                     | その他の娯楽                                                   | 1.36E-2                                                          | 0.00E+0                                               | 8.83E-3                                             | 4.81E-3                                                        | 1.01E+2                                     |
| JD391      | 861201      | General eating and drinking places (except coffee shops)                                    | 一般飲食店(除喫茶店)                                              | 8.46E-3                                                          | 0.00E+0                                               | 2.92E-3                                             | 5.54E-3                                                        | 1.75E+2                                     |
| JD392      | 861202      | Coffee shops                                                                                | 喫茶店                                                      | 7.88E-3                                                          | 0.00E+0                                               | 2.93E-3                                             | 4.95E-3                                                        | 1.72E+2                                     |
| JD393      | 861203      | Eating and drinking places for pleasures                                                    | 遊興飲食店                                                    | 6.82E-3                                                          | 0.00E+0                                               | 2.36E-3                                             | 4.46E-3                                                        | 1.81E+2                                     |
| JD394      | 861301      | Hotels                                                                                      | 宿泊業                                                      | 8.94E-3                                                          | 0.00E+0                                               | 4.49E-3                                             | 4.45E-3                                                        | 1.36E+2                                     |
| JD395      | 861401      | Cleaning                                                                                    | 洗濯業                                                      | 8.20E-3                                                          | 0.00E+0                                               | 3.81E-3                                             | 4.39E-3                                                        | 1.53E+2                                     |
| JD396      | 861402      | Barber shops                                                                                | 理容業                                                      | 8.83E-3                                                          | 0.00E+0                                               | 6.42E-3                                             | 2.41E-3                                                        | 7.70E+1                                     |
| JD397      | 861403      | Beauty shops                                                                                | 美容業                                                      | 9.71E-3                                                          | 0.00E+0                                               | 6.82E-3                                             | 2.90E-3                                                        | 8.42E+1                                     |
| JD398      | 861404      | Public baths                                                                                | 浴場業                                                      | 1.14E-2                                                          | 0.00E+0                                               | 5.68E-3                                             | 5.68E-3                                                        | 1.47E+2                                     |
| JD399      | 861409      | Other cleaning, barber shops, beauty shops and public baths                                 | その他の洗濯・理容・美容・浴場業                                         | 5.25E-2                                                          | 0.00E+0                                               | 4.83E-2                                             | 4.24E-3                                                        | 2.29E+1                                     |
| JD400      | 861901      | Photographic studios                                                                        | 写真業                                                      | 1.07E-2                                                          | 0.00E+0                                               | 6.30E-3                                             | 4.42E-3                                                        | 1.19E+2                                     |
| JD401      | 861902      | Ceremonial occasions                                                                        | 冠婚葬祭業                                                    | 1.13E-2                                                          | 0.00E+0                                               | 7.16E-3                                             | 4.11E-3                                                        | 1.05E+2                                     |
| JD402      | 861903      | Miscellaneous repairs, n.e.c.                                                               | 各種修理業(除別掲)                                               | 1.01E-2                                                          | 0.00E+0                                               | 5.46E-3                                             | 4.62E-3                                                        | 1.29E+2                                     |
| JD403      | 861904      | Supplementary tutorial schools, instruction services for arts, culture and technical skills | 個人教授業                                                    | 6.52E-3                                                          | 0.00E+0                                               | 4.09E-3                                             | 2.43E-3                                                        | 1.05E+2                                     |
| JD404      | 861909      | Other personal services                                                                     | その他の対個人サービス                                              | 7.29E-3                                                          | 0.00E+0                                               | 4.49E-3                                             | 2.80E-3                                                        | 1.09E+2                                     |
| JD405      | 890000      | Office supplies                                                                             | 事務用品                                                     | 4.50E-2                                                          | 0.00E+0                                               | 7.86E-3                                             | 3.71E-2                                                        | 2.55E+2                                     |
| JD406      | 900000      | Activities not elsewhere classified                                                         | 分類不明                                                     | 2.06E-2                                                          | 0.00E+0                                               | 7.58E-3                                             | 1.31E-2                                                        | 1.82E+2                                     |

Table A8: Embodied global SF<sub>6</sub> intensities of Japanese goods and services based on producer price in 2005 [1/5]

| Sector no. | Sector code | Sector name<br>[Japanese domestic commodity]                                 | Sector name in Japanese<br>[Japanese domestic commodity] | Embodied global SF <sub>6</sub> intensities based on producer price in 2005 |                                                       |                                                     |                                                                |                                             |
|------------|-------------|------------------------------------------------------------------------------|----------------------------------------------------------|-----------------------------------------------------------------------------|-------------------------------------------------------|-----------------------------------------------------|----------------------------------------------------------------|---------------------------------------------|
|            |             |                                                                              |                                                          | Total                                                                       | (D) Direct emissions<br>in Japan during<br>production | (S) Induced<br>emissions in Japan<br>through supply | (F) Induced emissions<br>in foreign country's<br>supply chains | Coefficient of variance<br>of the intensity |
|            |             |                                                                              |                                                          | tCO <sub>2</sub> eq/M-JPY                                                   | tCO <sub>2</sub> eq/M-JPY                             | tCO <sub>2</sub> eq/M-JPY                           | tCO <sub>2</sub> eq/M-JPY                                      | %                                           |
| JD1        | 011101      | Rice                                                                         | 米                                                        | 2.61E-3                                                                     | 0.00E+0                                               | 1.00E-3                                             | 1.60E-3                                                        | 7.80E+1                                     |
| JD2        | 011102      | Wheat, barley and the like                                                   | 麦類                                                       | 3.27E-3                                                                     | 0.00E+0                                               | 1.23E-3                                             | 2.04E-3                                                        | 7.92E+1                                     |
| JD3        | 011201      | Potatoes and sweet potatoes                                                  | いも類                                                      | 2.29E-3                                                                     | 0.00E+0                                               | 7.52E-4                                             | 1.54E-3                                                        | 8.73E+1                                     |
| JD4        | 011202      | Pulses                                                                       | 豆類                                                       | 2.89E-3                                                                     | 0.00E+0                                               | 1.10E-3                                             | 1.78E-3                                                        | 7.69E+1                                     |
| JD5        | 011301      | Vegetables                                                                   | 野菜                                                       | 2.48E-3                                                                     | 0.00E+0                                               | 7.61E-4                                             | 1.72E-3                                                        | 9.49E+1                                     |
| JD6        | 011401      | Fruits                                                                       | 果実                                                       | 2.17E-3                                                                     | 0.00E+0                                               | 6.89E-4                                             | 1.48E-3                                                        | 8.88E+1                                     |
| JD7        | 011501      | Sugar crops                                                                  | 砂糖原料作物                                                   | 2.35E-3                                                                     | 0.00E+0                                               | 7.58E-4                                             | 1.60E-3                                                        | 8.97E+1                                     |
| JD8        | 011502      | Crops for beverages                                                          | 飲料用作物                                                    | 3.04E-3                                                                     | 0.00E+0                                               | 1.38E-3                                             | 1.67E-3                                                        | 7.03E+1                                     |
| JD9        | 011509      | Other edible crops                                                           | その他の食用耕種作物                                               | 2.70E-3                                                                     | 0.00E+0                                               | 8.93E-4                                             | 1.81E-3                                                        | 8.55E+1                                     |
| JD10       | 011601      | Crops for feed and forage                                                    | 飼料作物                                                     | 2.69E-3                                                                     | 0.00E+0                                               | 9.11E-4                                             | 1.78E-3                                                        | 8.25E+1                                     |
| JD11       | 011602      | Seeds and seedlings                                                          | 種苗                                                       | 2.06E-3                                                                     | 0.00E+0                                               | 6.02E-4                                             | 1.46E-3                                                        | 1.21E+2                                     |
| JD12       | 011603      | Flowers and plants                                                           | 花き・花木類                                                   | 4.71E-3                                                                     | 0.00E+0                                               | 1.17E-3                                             | 3.54E-3                                                        | 1.13E+2                                     |
| JD13       | 011609      | Other inedible crops                                                         | その他の非食用耕種作物                                              | 1.58E-3                                                                     | 0.00E+0                                               | 5.01E-4                                             | 1.08E-3                                                        | 8.85E+1                                     |
| JD14       | 012101      | Dairy cattle farming                                                         | 酪農                                                       | 2.56E-3                                                                     | 0.00E+0                                               | 9.78E-4                                             | 1.58E-3                                                        | 7.28E+1                                     |
| JD15       | 012102      | Hen eggs                                                                     | 鶏卵                                                       | 2.46E-3                                                                     | 0.00E+0                                               | 8.31E-4                                             | 1.63E-3                                                        | 7.99E+1                                     |
| JD16       | 012103      | Fowls and broilers                                                           | 肉鶏                                                       | 3.17E-3                                                                     | 0.00E+0                                               | 1.19E-3                                             | 1.99E-3                                                        | 7.56E+1                                     |
| JD17       | 012104      | Hogs                                                                         | 豚                                                        | 2.81E-3                                                                     | 0.00E+0                                               | 1.16E-3                                             | 1.65E-3                                                        | 7.06E+1                                     |
| JD18       | 012105      | Beef cattle                                                                  | 肉用牛                                                      | 2.71E-3                                                                     | 0.00E+0                                               | 1.00E-3                                             | 1.70E-3                                                        | 7.52E+1                                     |
| JD19       | 012109      | Other livestock                                                              | その他の畜産                                                   | 2.65E-3                                                                     | 0.00E+0                                               | 1.07E-3                                             | 1.58E-3                                                        | 7.11E+1                                     |
| JD20       | 013101      | Veterinary service                                                           | 獣医療                                                      | 3.47E-3                                                                     | 0.00E+0                                               | 9.70E-4                                             | 2.50E-3                                                        | 9.07E+1                                     |
| JD21       | 013102      | Agricultural services (except veterinary service)                            | 農業サービス (除獣医療)                                            | 3.82E-3                                                                     | 0.00E+0                                               | 1.82E-3                                             | 1.99E-3                                                        | 6.48E+1                                     |
| JD22       | 021101      | Silviculture                                                                 | 育林                                                       | 7.97E-4                                                                     | 0.00E+0                                               | 2.76E-4                                             | 5.21E-4                                                        | 8.15E+1                                     |
| JD23       | 021201      | Logs                                                                         | 素材                                                       | 2.69E-3                                                                     | 0.00E+0                                               | 8.55E-4                                             | 1.84E-3                                                        | 8.70E+1                                     |
| JD24       | 021301      | Special forest products (inc. hunting)                                       | 特用林産物 (含狩猟業)                                             | 4.77E-3                                                                     | 0.00E+0                                               | 1.80E-3                                             | 2.97E-3                                                        | 8.83E+1                                     |
| JD25       | 031101      | Marine fisheries                                                             | 海面漁業                                                     | 5.41E-3                                                                     | 0.00E+0                                               | 9.21E-4                                             | 4.49E-3                                                        | 1.15E+2                                     |
| JD26       | 031104      | Marine culture                                                               | 海面養殖業                                                    | 3.52E-3                                                                     | 0.00E+0                                               | 9.12E-4                                             | 2.60E-3                                                        | 9.61E+1                                     |
| JD27       | 0312001     | Inland water fisheries and culture                                           | 内水面漁業・養殖業                                                | 4.10E-3                                                                     | 0.00E+0                                               | 1.60E-3                                             | 2.50E-3                                                        | 8.03E+1                                     |
| JD28       | 061101      | Metallic ores                                                                | 金属鉱物                                                     | 7.57E-3                                                                     | 0.00E+0                                               | 4.79E-3                                             | 2.78E-3                                                        | 4.96E+1                                     |
| JD29       | 062101      | Materials for ceramics                                                       | 窯業原料鉱物                                                   | 6.24E-3                                                                     | 0.00E+0                                               | 2.47E-3                                             | 3.77E-3                                                        | 8.69E+1                                     |
| JD30       | 062201      | Gravel and quarrying                                                         | 砂利・採石                                                    | 6.71E-3                                                                     | 0.00E+0                                               | 2.34E-3                                             | 4.37E-3                                                        | 9.62E+1                                     |
| JD31       | 062202      | Crushed stones                                                               | 砕石                                                       | 6.14E-3                                                                     | 0.00E+0                                               | 2.28E-3                                             | 3.86E-3                                                        | 9.36E+1                                     |
| JD32       | 062909      | Other non-metallic ores                                                      | その他の非金属鉱物                                                | 8.26E-3                                                                     | 0.00E+0                                               | 3.01E-3                                             | 5.25E-3                                                        | 9.24E+1                                     |
| JD33       | 071101      | Coal mining, crude petroleum and natural gas                                 | 石炭・原油・天然ガス                                               | 5.18E-3                                                                     | 0.00E+0                                               | 3.50E-3                                             | 1.69E-3                                                        | 4.04E+1                                     |
| JD34       | 0711011     | Coal mining                                                                  | 石炭                                                       | 5.18E-3                                                                     | 0.00E+0                                               | 3.50E-3                                             | 1.69E-3                                                        | 4.04E+1                                     |
| JD35       | 0711012     | Crude petroleum                                                              | 原油                                                       | 5.18E-3                                                                     | 0.00E+0                                               | 3.50E-3                                             | 1.69E-3                                                        | 4.04E+1                                     |
| JD36       | 0711013     | Natural gas                                                                  | 天然ガス                                                     | 5.18E-3                                                                     | 0.00E+0                                               | 3.50E-3                                             | 1.69E-3                                                        | 4.04E+1                                     |
| JD37       | 111101      | Slaughtering and meat processing                                             | と畜 (含肉鶏処理)                                               | 2.66E-3                                                                     | 0.00E+0                                               | 1.03E-3                                             | 1.63E-3                                                        | 7.38E+1                                     |
| JD38       | 111201      | Processed meat products                                                      | 肉加工品                                                     | 2.94E-3                                                                     | 0.00E+0                                               | 7.36E-4                                             | 2.20E-3                                                        | 1.01E+2                                     |
| JD39       | 111202      | Bottled or canned meat products                                              | 畜産びん・かん詰                                                 | 2.59E-3                                                                     | 0.00E+0                                               | 1.15E-3                                             | 1.44E-3                                                        | 6.69E+1                                     |
| JD40       | 111203      | Dairy farm products                                                          | 酪農品                                                      | 3.05E-3                                                                     | 0.00E+0                                               | 1.26E-3                                             | 1.80E-3                                                        | 7.25E+1                                     |
| JD41       | 111301      | Frozen fish and shellfish                                                    | 冷凍魚介類                                                    | 3.84E-3                                                                     | 0.00E+0                                               | 9.41E-4                                             | 2.90E-3                                                        | 9.13E+1                                     |
| JD42       | 111302      | Salted, dried or smoked seafood                                              | 塩・干・くん製品                                                 | 2.82E-3                                                                     | 0.00E+0                                               | 8.14E-4                                             | 2.01E-3                                                        | 8.80E+1                                     |
| JD43       | 111303      | Bottled or canned seafood                                                    | 水産びん・かん詰                                                 | 3.10E-3                                                                     | 0.00E+0                                               | 1.22E-3                                             | 1.87E-3                                                        | 7.67E+1                                     |
| JD44       | 111304      | Fish paste                                                                   | ねり製品                                                     | 2.74E-3                                                                     | 0.00E+0                                               | 1.05E-3                                             | 1.69E-3                                                        | 7.38E+1                                     |
| JD45       | 111309      | Other processed seafood                                                      | その他の水産食品                                                 | 2.59E-3                                                                     | 0.00E+0                                               | 8.67E-4                                             | 1.72E-3                                                        | 8.17E+1                                     |
| JD46       | 111401      | Grain milling                                                                | 精穀                                                       | 2.50E-3                                                                     | 0.00E+0                                               | 1.01E-3                                             | 1.49E-3                                                        | 7.61E+1                                     |
| JD47       | 111402      | Flour and other grain milled products                                        | 製粉                                                       | 3.34E-3                                                                     | 0.00E+0                                               | 1.04E-3                                             | 2.30E-3                                                        | 8.15E+1                                     |
| JD48       | 111501      | Noodles                                                                      | めん類                                                      | 2.85E-3                                                                     | 0.00E+0                                               | 1.05E-3                                             | 1.80E-3                                                        | 7.91E+1                                     |
| JD49       | 111502      | Bread                                                                        | パン類                                                      | 2.40E-3                                                                     | 0.00E+0                                               | 1.05E-3                                             | 1.35E-3                                                        | 6.74E+1                                     |
| JD50       | 111503      | Confectionery                                                                | 菓子類                                                      | 2.46E-3                                                                     | 0.00E+0                                               | 1.01E-3                                             | 1.44E-3                                                        | 7.13E+1                                     |
| JD51       | 111601      | Bottled or canned vegetables and fruits                                      | 農産びん・かん詰                                                 | 3.23E-3                                                                     | 0.00E+0                                               | 1.49E-3                                             | 1.75E-3                                                        | 6.56E+1                                     |
| JD52       | 111602      | Preserved agricultural foodstuffs (other than bottled or canned)             | 農産保存食料品 (除びん・かん詰)                                        | 2.12E-3                                                                     | 0.00E+0                                               | 8.73E-4                                             | 1.25E-3                                                        | 7.54E+1                                     |
| JD53       | 111701      | Sugar                                                                        | 砂糖                                                       | 3.90E-3                                                                     | 0.00E+0                                               | 1.43E-3                                             | 2.47E-3                                                        | 8.23E+1                                     |
| JD54       | 111702      | Starch                                                                       | でん粉                                                      | 3.40E-3                                                                     | 0.00E+0                                               | 1.23E-3                                             | 2.17E-3                                                        | 7.83E+1                                     |
| JD55       | 111703      | Dextrose, syrup and isomerized sugar                                         | ぶどう糖・水あめ・異性化糖                                            | 4.92E-3                                                                     | 0.00E+0                                               | 2.41E-3                                             | 2.51E-3                                                        | 6.77E+1                                     |
| JD56       | 111704      | Vegetable oils and meal                                                      | 植物油脂                                                     | 3.19E-3                                                                     | 0.00E+0                                               | 1.07E-3                                             | 2.12E-3                                                        | 8.25E+1                                     |
| JD57       | 111705      | Animal oils and fats                                                         | 動物油脂                                                     | 4.36E-3                                                                     | 0.00E+0                                               | 1.93E-3                                             | 2.43E-3                                                        | 7.30E+1                                     |
| JD58       | 111706      | Condiments and seasonings                                                    | 調味料                                                      | 2.69E-3                                                                     | 0.00E+0                                               | 1.19E-3                                             | 1.51E-3                                                        | 6.88E+1                                     |
| JD59       | 111901      | Prepared frozen foods                                                        | 冷凍調理食品                                                   | 3.00E-3                                                                     | 0.00E+0                                               | 1.28E-3                                             | 1.72E-3                                                        | 6.81E+1                                     |
| JD60       | 111902      | Retort foods                                                                 | レトルト食品                                                   | 2.82E-3                                                                     | 0.00E+0                                               | 9.81E-4                                             | 1.84E-3                                                        | 7.83E+1                                     |
| JD61       | 111903      | Dishes, sushi and lunch boxes                                                | そう菜・すし・弁当                                                | 2.54E-3                                                                     | 0.00E+0                                               | 9.48E-4                                             | 1.59E-3                                                        | 7.48E+1                                     |
| JD62       | 111904      | School lunch (public) **                                                     | 学校給食 (国公立) ★★                                            | 1.93E-3                                                                     | 0.00E+0                                               | 6.92E-4                                             | 1.24E-3                                                        | 7.78E+1                                     |
| JD63       | 111905      | School lunch (private) *                                                     | 学校給食 (私立) ★                                              | 2.06E-3                                                                     | 0.00E+0                                               | 7.69E-4                                             | 1.29E-3                                                        | 7.36E+1                                     |
| JD64       | 111909      | Other foods                                                                  | その他の食料品                                                  | 3.10E-3                                                                     | 0.00E+0                                               | 1.37E-3                                             | 1.73E-3                                                        | 6.96E+1                                     |
| JD65       | 112101      | Refined sake                                                                 | 清酒                                                       | 2.03E-3                                                                     | 0.00E+0                                               | 9.73E-4                                             | 1.06E-3                                                        | 6.70E+1                                     |
| JD66       | 112102      | Beer                                                                         | ビール                                                      | 1.50E-3                                                                     | 0.00E+0                                               | 8.30E-4                                             | 6.66E-4                                                        | 5.65E+1                                     |
| JD67       | 112103      | Whiskey and brandy                                                           | ウイスキー類                                                   | 1.75E-3                                                                     | 0.00E+0                                               | 8.04E-4                                             | 9.42E-4                                                        | 6.91E+1                                     |
| JD68       | 112109      | Other liquors                                                                | その他の酒類                                                   | 1.93E-3                                                                     | 0.00E+0                                               | 8.17E-4                                             | 1.12E-3                                                        | 7.35E+1                                     |
| JD69       | 112901      | Tea and roasted coffee                                                       | 茶・コーヒー                                                   | 2.69E-3                                                                     | 0.00E+0                                               | 1.10E-3                                             | 1.59E-3                                                        | 8.41E+1                                     |
| JD70       | 112902      | Soft drinks                                                                  | 清涼飲料                                                     | 2.56E-3                                                                     | 0.00E+0                                               | 1.22E-3                                             | 1.34E-3                                                        | 6.47E+1                                     |
| JD71       | 112903      | Manufactured ice                                                             | 製氷                                                       | 8.18E-3                                                                     | 0.00E+0                                               | 5.13E-3                                             | 3.05E-3                                                        | 4.53E+1                                     |
| JD72       | 113101      | Animal feed                                                                  | 飼料                                                       | 2.58E-3                                                                     | 0.00E+0                                               | 7.81E-4                                             | 1.80E-3                                                        | 8.37E+1                                     |
| JD73       | 113102      | Organic fertilizers, n.e.c.                                                  | 有機質肥料 (除別掲)                                              | 2.13E-3                                                                     | 0.00E+0                                               | 7.24E-4                                             | 1.40E-3                                                        | 8.08E+1                                     |
| JD74       | 114101      | Tobacco                                                                      | たばこ                                                      | 7.03E-4                                                                     | 0.00E+0                                               | 2.67E-4                                             | 4.37E-4                                                        | 7.62E+1                                     |
| JD75       | 151101      | Fiber yarns                                                                  | 紡績糸                                                      | 3.40E-3                                                                     | 0.00E+0                                               | 1.44E-3                                             | 1.95E-3                                                        | 7.29E+1                                     |
| JD76       | 151201      | Cotton and staple fiber fabrics (inc. fabrics of synthetic spun fibers)      | 綿・スフ織物 (含合繊短繊維織物)                                        | 3.91E-3                                                                     | 0.00E+0                                               | 1.86E-3                                             | 2.05E-3                                                        | 7.15E+1                                     |
| JD77       | 151202      | Silk and artificial silk fabrics (inc. fabrics of synthetic filament fibers) | 絹・人絹織物 (含合繊長繊維織物)                                        | 4.35E-3                                                                     | 0.00E+0                                               | 1.91E-3                                             | 2.44E-3                                                        | 7.47E+1                                     |
| JD78       | 151203      | Woolen fabrics, hemp fabrics and other fabrics                               | 毛織物・麻織物・その他の織物                                           | 3.58E-3                                                                     | 0.00E+0                                               | 1.54E-3                                             | 2.04E-3                                                        | 7.59E+1                                     |
| JD79       | 151301      | Knitting fabrics                                                             | ニット生地                                                    | 2.94E-3                                                                     | 0.00E+0                                               | 1.34E-3                                             | 1.60E-3                                                        | 7.15E+1                                     |
| JD80       | 151401      | Yarn and fabric dyeing and finishing (processing on commission only)         | 染色整理                                                     | 4.78E-3                                                                     | 0.00E+0                                               | 1.89E-3                                             | 2.89E-3                                                        | 8.19E+1                                     |
| JD81       | 151901      | Ropes and nets                                                               | 綱・網                                                      | 4.08E-3                                                                     | 0.00E+0                                               | 1.65E-3                                             | 2.42E-3                                                        | 7.97E+1                                     |
| JD82       | 151902      | Carpets and floor mats                                                       | じゅうたん・床敷物                                                | 3.98E-3                                                                     | 0.00E+0                                               | 1.57E-3                                             | 2.41E-3                                                        | 7.98E+1                                     |
| JD83       | 151903      | Fabricated textiles for medical use                                          | 繊維製衛生材料                                                  | 2.98E-3                                                                     | 0.00E+0                                               | 1.50E-3                                             | 1.48E-3                                                        | 6.31E+1                                     |
| JD84       | 151909      | Other fabricated textile products                                            | その他の繊維工業製品                                               | 3.76E-3                                                                     | 0.00E+0                                               | 1.54E-3                                             | 2.22E-3                                                        | 7.68E+1                                     |
| JD85       | 152101      | Woven fabric apparel                                                         | 織物製衣服                                                    | 2.61E-3                                                                     | 0.00E+0                                               | 1.09E-3                                             | 1.52E-3                                                        | 7.41E+1                                     |
| JD86       | 152102      | Knitted apparel                                                              | ニット製衣服                                                   | 3.19E-3                                                                     | 0.00E+0                                               | 1.46E-3                                             | 1.73E-3                                                        | 7.01E+1                                     |
| JD87       | 152209      | Other wearing apparel and clothing accessories                               | その他の衣服・身の回り品                                             | 3.23E-3                                                                     | 0.00E+0                                               | 1.48E-3                                             | 1.75E-3                                                        | 7.05E+1                                     |
| JD88       | 152901      | Bedding                                                                      | 寝具                                                       | 2.31E-3                                                                     | 0.00E+0                                               | 8.72E-4                                             | 1.43E-3                                                        | 7.52E+1                                     |
| JD89       | 152909      | Other ready-made textile products                                            | その他の繊維既製品                                                | 2.54E-3                                                                     | 0.00E+0                                               | 1.09E-3                                             | 1.45E-3                                                        | 7.39E+1                                     |
| JD90       | 161101      | Timber                                                                       | 製材                                                       | 3.23E-3                                                                     | 0.00E+0                                               | 7.95E-4                                             | 2.43E-3                                                        | 1.26E+2                                     |
| JD91       | 161102      | Plywood                                                                      | 合板                                                       | 4.04E-3                                                                     | 0.00E+0                                               | 1.52E-3                                             | 2.52E-3                                                        | 8.34E+1                                     |
| JD92       | 161103      | Wooden chips                                                                 | 木材チップ                                                    | 3.39E-3                                                                     | 0.00E+0                                               | 1.43E-3                                             | 1.96E-3                                                        | 7.29E+1                                     |

Table A8: Embodied global SF<sub>6</sub> intensities of Japanese goods and services based on producer price in 2005 [2/5]

| Sector no. | Sector code | Sector name<br>[Japanese domestic commodity]                | Sector name in Japanese<br>[Japanese domestic commodity] | Embodied global SF <sub>6</sub> intensities based on producer price in 2005 |                                                       |                                                     |                                                                |                                             |
|------------|-------------|-------------------------------------------------------------|----------------------------------------------------------|-----------------------------------------------------------------------------|-------------------------------------------------------|-----------------------------------------------------|----------------------------------------------------------------|---------------------------------------------|
|            |             |                                                             |                                                          | Total                                                                       | (D) Direct emissions<br>in Japan during<br>production | (S) Induced<br>emissions in Japan<br>through supply | (F) Induced emissions<br>in foreign country's<br>supply chains | Coefficient of variance<br>of the intensity |
|            |             |                                                             |                                                          | tCO <sub>2</sub> eq/M-JPY                                                   | tCO <sub>2</sub> eq/M-JPY                             | tCO <sub>2</sub> eq/M-JPY                           | tCO <sub>2</sub> eq/M-JPY                                      | %                                           |
| JD93       | 161909      | Other wooden products                                       | その他の木製品                                                  | 3.10E-3                                                                     | 0.00E+0                                               | 1.42E-3                                             | 1.68E-3                                                        | 6.60E+1                                     |
| JD94       | 171101      | Wooden furniture and fixtures                               | 木製家具・装備品                                                 | 4.96E-3                                                                     | 0.00E+0                                               | 3.54E-3                                             | 1.42E-3                                                        | 3.55E+1                                     |
| JD95       | 171102      | Wooden fixtures                                             | 木製建具                                                     | 4.22E-3                                                                     | 0.00E+0                                               | 2.82E-3                                             | 1.40E-3                                                        | 4.19E+1                                     |
| JD96       | 171103      | Metallic furniture and fixture                              | 金属製家具・装備品                                                | 8.50E-3                                                                     | 0.00E+0                                               | 6.99E-3                                             | 1.51E-3                                                        | 2.14E+1                                     |
| JD97       | 181101      | Pulp                                                        | パルプ                                                      | 7.48E-3                                                                     | 0.00E+0                                               | 4.38E-3                                             | 3.10E-3                                                        | 5.76E+1                                     |
| JD98       | 181201      | Paper                                                       | 洋紙・和紙                                                    | 7.52E-3                                                                     | 0.00E+0                                               | 5.17E-3                                             | 2.34E-3                                                        | 3.87E+1                                     |
| JD99       | 181202      | Paperboard                                                  | 板紙                                                       | 7.41E-3                                                                     | 0.00E+0                                               | 4.86E-3                                             | 2.55E-3                                                        | 4.38E+1                                     |
| JD100      | 181301      | Corrugated cardboard                                        | 段ボール                                                     | 4.79E-3                                                                     | 0.00E+0                                               | 2.83E-3                                             | 1.96E-3                                                        | 5.15E+1                                     |
| JD101      | 181302      | Coated paper and building<br>(construction) paper           | 塗工紙・建設用加工紙                                               | 3.94E-3                                                                     | 0.00E+0                                               | 1.99E-3                                             | 1.95E-3                                                        | 6.41E+1                                     |
| JD102      | 182101      | Corrugated card board boxes                                 | 段ボール箱                                                    | 2.76E-3                                                                     | 0.00E+0                                               | 1.48E-3                                             | 1.28E-3                                                        | 5.97E+1                                     |
| JD103      | 182109      | Other paper containers                                      | その他の紙製容器                                                 | 2.98E-3                                                                     | 0.00E+0                                               | 1.49E-3                                             | 1.49E-3                                                        | 6.14E+1                                     |
| JD104      | 182901      | Paper textile for medical use                               | 紙製衛生材料・用品                                                | 3.69E-3                                                                     | 0.00E+0                                               | 1.65E-3                                             | 2.04E-3                                                        | 7.17E+1                                     |
| JD105      | 182909      | Other pulp, paper and processed paper<br>products           | その他のパルプ・紙・紙加工品                                           | 3.07E-3                                                                     | 0.00E+0                                               | 1.69E-3                                             | 1.38E-3                                                        | 5.71E+1                                     |
| JD106      | 191101      | Printing, plate making and book binding                     | 印刷・製版・製本                                                 | 2.34E-3                                                                     | 0.00E+0                                               | 1.26E-3                                             | 1.08E-3                                                        | 5.81E+1                                     |
| JD107      | 201101      | Chemical fertilizer                                         | 化学肥料                                                     | 6.49E-3                                                                     | 0.00E+0                                               | 1.93E-3                                             | 4.55E-3                                                        | 1.00E+2                                     |
| JD108      | 202101      | Industrial soda chemicals                                   | ソーダ工業製品                                                  | 1.41E-2                                                                     | 0.00E+0                                               | 1.06E-2                                             | 3.53E-3                                                        | 3.25E+1                                     |
| JD109      | 202901      | Inorganic pigment                                           | 無機顔料                                                     | 6.96E-3                                                                     | 0.00E+0                                               | 3.37E-3                                             | 3.59E-3                                                        | 6.65E+1                                     |
| JD110      | 202902      | Compressed gas and liquefied gas                            | 圧縮ガス・液化ガス                                                | 1.18E-2                                                                     | 0.00E+0                                               | 8.89E-3                                             | 2.92E-3                                                        | 3.13E+1                                     |
| JD111      | 202903      | Salt                                                        | 塩                                                        | 4.73E-3                                                                     | 0.00E+0                                               | 2.15E-3                                             | 2.58E-3                                                        | 6.46E+1                                     |
| JD112      | 202909      | Other industrial inorganic chemicals                        | その他の無機化学工業製品                                             | 5.99E-3                                                                     | 0.00E+0                                               | 2.86E-3                                             | 3.13E-3                                                        | 6.38E+1                                     |
| JD113      | 203101      | Petrochemical basic products                                | 石油化学基礎製品                                                 | 2.61E-2                                                                     | 0.00E+0                                               | 1.83E-3                                             | 2.43E-2                                                        | 1.44E+2                                     |
| JD114      | 203102      | Petrochemical aromatic products<br>(except synthetic resin) | 石油化学系芳香族製品                                               | 2.18E-2                                                                     | 0.00E+0                                               | 1.35E-3                                             | 2.04E-2                                                        | 1.45E+2                                     |
| JD115      | 203201      | Aliphatic intermediates                                     | 脂肪族中間物                                                   | 1.58E-2                                                                     | 0.00E+0                                               | 3.24E-3                                             | 1.25E-2                                                        | 1.17E+2                                     |
| JD116      | 203202      | Cyclic intermediates                                        | 環状中間物                                                    | 1.32E-2                                                                     | 0.00E+0                                               | 1.88E-3                                             | 1.14E-2                                                        | 1.24E+2                                     |
| JD117      | 203301      | Synthetic rubber                                            | 合成ゴム                                                     | 1.32E-2                                                                     | 0.00E+0                                               | 3.91E-3                                             | 9.25E-3                                                        | 1.03E+2                                     |
| JD118      | 203901      | Methane derivatives                                         | メタン誘導品                                                   | 7.00E-3                                                                     | 0.00E+0                                               | 2.63E-3                                             | 4.37E-3                                                        | 7.75E+1                                     |
| JD119      | 203902      | Oil and fat industrial chemicals                            | 油脂加工製品                                                   | 3.25E-3                                                                     | 0.00E+0                                               | 1.28E-3                                             | 1.97E-3                                                        | 7.54E+1                                     |
| JD120      | 203903      | Plasticizers                                                | 可塑剤                                                      | 6.01E-3                                                                     | 0.00E+0                                               | 1.93E-3                                             | 4.09E-3                                                        | 8.57E+1                                     |
| JD121      | 203904      | Synthetic dyes                                              | 合成染料                                                     | 6.35E-3                                                                     | 0.00E+0                                               | 2.76E-3                                             | 3.59E-3                                                        | 7.36E+1                                     |
| JD122      | 203909      | Other industrial organic chemicals                          | その他の有機化学工業製品                                             | 6.98E-3                                                                     | 0.00E+0                                               | 2.85E-3                                             | 4.13E-3                                                        | 7.95E+1                                     |
| JD123      | 204101      | Thermo-setting resins                                       | 熱硬化性樹脂                                                   | 7.64E-3                                                                     | 0.00E+0                                               | 1.63E-3                                             | 6.01E-3                                                        | 1.05E+2                                     |
| JD124      | 204102      | Thermoplastics resins                                       | 熱可塑性樹脂                                                   | 1.47E-2                                                                     | 0.00E+0                                               | 2.06E-3                                             | 1.26E-2                                                        | 1.29E+2                                     |
| JD125      | 204103      | High function resins                                        | 高機能性樹脂                                                   | 8.55E-3                                                                     | 0.00E+0                                               | 1.79E-3                                             | 6.76E-3                                                        | 1.06E+2                                     |
| JD126      | 204109      | Other resins                                                | その他の合成樹脂                                                 | 8.04E-3                                                                     | 0.00E+0                                               | 1.76E-3                                             | 6.28E-3                                                        | 1.07E+2                                     |
| JD127      | 205101      | Rayon and acetate                                           | レーヨン・アセテート                                               | 6.12E-3                                                                     | 0.00E+0                                               | 2.65E-3                                             | 3.47E-3                                                        | 7.31E+1                                     |
| JD128      | 205102      | Synthetic fibers                                            | 合成繊維                                                     | 8.06E-3                                                                     | 0.00E+0                                               | 3.08E-3                                             | 4.99E-3                                                        | 8.45E+1                                     |
| JD129      | 206101      | Medicaments                                                 | 医薬品                                                      | 2.68E-3                                                                     | 0.00E+0                                               | 1.12E-3                                             | 1.56E-3                                                        | 7.17E+1                                     |
| JD130      | 207101      | Soap, synthetic detergents and surface<br>active agents     | 石けん・合成洗剤・界面活性剤                                           | 3.74E-3                                                                     | 0.00E+0                                               | 1.35E-3                                             | 2.39E-3                                                        | 8.04E+1                                     |
| JD131      | 207102      | Cosmetics, toilet preparations and<br>dentifrices           | 化粧品・歯磨                                                   | 3.20E-3                                                                     | 0.00E+0                                               | 1.44E-3                                             | 1.76E-3                                                        | 6.87E+1                                     |
| JD132      | 207201      | Paint and varnishes                                         | 塗料                                                       | 5.43E-3                                                                     | 0.00E+0                                               | 1.48E-3                                             | 3.95E-3                                                        | 9.70E+1                                     |
| JD133      | 207202      | Printing ink                                                | 印刷インキ                                                    | 5.05E-3                                                                     | 0.00E+0                                               | 1.39E-3                                             | 3.67E-3                                                        | 9.65E+1                                     |
| JD134      | 207301      | Photographic sensitive materials                            | 写真感光材料                                                   | 4.12E-3                                                                     | 0.00E+0                                               | 1.93E-3                                             | 2.18E-3                                                        | 6.48E+1                                     |
| JD135      | 207401      | Agricultural chemicals                                      | 農薬                                                       | 4.49E-3                                                                     | 0.00E+0                                               | 2.04E-3                                             | 2.44E-3                                                        | 6.69E+1                                     |
| JD136      | 207901      | Gelatin and adhesives                                       | ゼラチン・接着剤                                                 | 4.84E-3                                                                     | 0.00E+0                                               | 1.28E-3                                             | 3.57E-3                                                        | 9.49E+1                                     |
| JD137      | 207909      | Other final chemical products                               | その他の化学最終製品                                               | 5.28E-3                                                                     | 0.00E+0                                               | 1.68E-3                                             | 3.60E-3                                                        | 8.85E+1                                     |
| JD138      | 211101      | Petroleum refinery products (inc.<br>greases)               | 石油製品                                                     | 3.13E-2                                                                     | 0.00E+0                                               | 1.24E-3                                             | 3.00E-2                                                        | 1.59E+2                                     |
| JD139      | 212101      | Coal products                                               | 石炭製品                                                     | 4.10E-3                                                                     | 0.00E+0                                               | 6.46E-4                                             | 3.45E-3                                                        | 1.45E+2                                     |
| JD140      | 212102      | Paving materials                                            | 舗装材料                                                     | 9.69E-3                                                                     | 0.00E+0                                               | 1.50E-3                                             | 8.19E-3                                                        | 1.32E+2                                     |
| JD141      | 221101      | Plastic products                                            | プラスチック製品                                                 | 4.89E-3                                                                     | 0.00E+0                                               | 1.78E-3                                             | 3.11E-3                                                        | 8.43E+1                                     |
| JD142      | 231101      | Tires and inner tubes                                       | タイヤ・チューブ                                                 | 5.10E-3                                                                     | 0.00E+0                                               | 2.16E-3                                             | 2.94E-3                                                        | 7.45E+1                                     |
| JD143      | 231901      | Rubber footwear                                             | ゴム製履物                                                    | 2.56E-3                                                                     | 0.00E+0                                               | 1.13E-3                                             | 1.43E-3                                                        | 7.53E+1                                     |
| JD144      | 231902      | Plastic footwear                                            | プラスチック製履物                                                | 2.92E-3                                                                     | 0.00E+0                                               | 1.31E-3                                             | 1.62E-3                                                        | 7.37E+1                                     |
| JD145      | 231909      | Other rubber products                                       | その他のゴム製品                                                 | 3.79E-3                                                                     | 0.00E+0                                               | 1.64E-3                                             | 2.15E-3                                                        | 7.23E+1                                     |
| JD146      | 241101      | Leather footwear                                            | 革製履物                                                     | 2.14E-3                                                                     | 0.00E+0                                               | 8.21E-4                                             | 1.32E-3                                                        | 7.34E+1                                     |
| JD147      | 241201      | Leather and fur skins                                       | 製革・毛皮                                                    | 3.58E-3                                                                     | 0.00E+0                                               | 1.03E-3                                             | 2.55E-3                                                        | 8.00E+1                                     |
| JD148      | 241202      | Miscellaneous leather products                              | かばん・袋物・その他の革製品                                           | 3.66E-3                                                                     | 0.00E+0                                               | 2.02E-3                                             | 1.64E-3                                                        | 5.42E+1                                     |
| JD149      | 251101      | Sheet glass and safety glass                                | 板ガラス・安全ガラス                                               | 3.48E-3                                                                     | 0.00E+0                                               | 1.37E-3                                             | 2.12E-3                                                        | 7.61E+1                                     |
| JD150      | 251201      | Glass fiber and glass fiber products,<br>n.e.c.             | ガラス繊維・同製品                                                | 7.04E-3                                                                     | 0.00E+0                                               | 3.83E-3                                             | 3.20E-3                                                        | 6.07E+1                                     |
| JD151      | 251909      | Other glass products                                        | その他のガラス製品                                                | 3.89E-3                                                                     | 0.00E+0                                               | 1.63E-3                                             | 2.27E-3                                                        | 7.45E+1                                     |
| JD152      | 252101      | Cement                                                      | セメント                                                     | 9.63E-3                                                                     | 0.00E+0                                               | 6.53E-3                                             | 3.10E-3                                                        | 4.09E+1                                     |
| JD153      | 252201      | Ready mixed concrete                                        | 生コンクリート                                                  | 4.59E-3                                                                     | 0.00E+0                                               | 2.14E-3                                             | 2.45E-3                                                        | 7.23E+1                                     |
| JD154      | 252301      | Cement products                                             | セメント製品                                                   | 3.21E-3                                                                     | 0.00E+0                                               | 1.53E-3                                             | 1.69E-3                                                        | 6.50E+1                                     |
| JD155      | 253101      | Pottery, china and earthenware                              | 陶磁器                                                      | 4.49E-3                                                                     | 0.00E+0                                               | 1.89E-3                                             | 2.60E-3                                                        | 7.73E+1                                     |
| JD156      | 259901      | Clay refractories                                           | 耐火物                                                      | 5.40E-3                                                                     | 0.00E+0                                               | 2.76E-3                                             | 2.64E-3                                                        | 5.88E+1                                     |
| JD157      | 259902      | Other structural clay products                              | その他の建設用土石製品                                              | 4.78E-3                                                                     | 0.00E+0                                               | 1.65E-3                                             | 3.13E-3                                                        | 9.53E+1                                     |
| JD158      | 259903      | Carbon and graphite products                                | 炭素・黒鉛製品                                                  | 5.56E-3                                                                     | 0.00E+0                                               | 2.90E-3                                             | 2.66E-3                                                        | 5.96E+1                                     |
| JD159      | 259904      | Abrasive                                                    | 研磨材                                                      | 3.13E-3                                                                     | 0.00E+0                                               | 1.20E-3                                             | 1.92E-3                                                        | 7.55E+1                                     |
| JD160      | 259909      | Miscellaneous ceramic, stone and clay<br>products           | その他の窯業・土石製品                                              | 3.77E-3                                                                     | 0.00E+0                                               | 1.75E-3                                             | 2.02E-3                                                        | 6.65E+1                                     |
| JD161      | 261101      | Pig iron                                                    | 鉄鉄                                                       | 4.82E-3                                                                     | 0.00E+0                                               | 1.95E-3                                             | 2.87E-3                                                        | 1.01E+2                                     |
| JD162      | 261102      | Ferro alloys                                                | フェロアロイ                                                   | 6.21E-3                                                                     | 0.00E+0                                               | 3.16E-3                                             | 3.05E-3                                                        | 6.41E+1                                     |
| JD163      | 261103      | Crude steel (converters)                                    | 粗鋼(転炉)                                                   | 4.46E-3                                                                     | 0.00E+0                                               | 1.94E-3                                             | 2.52E-3                                                        | 7.61E+1                                     |
| JD164      | 261104      | Crude steel (electric furnaces)                             | 粗鋼(電気炉)                                                  | 5.65E-3                                                                     | 0.00E+0                                               | 3.29E-3                                             | 2.36E-3                                                        | 6.47E+1                                     |
| JD165      | 261201      | Scrap iron                                                  | 鉄屑                                                       | 0.00E+0                                                                     | 0.00E+0                                               | 0.00E+0                                             | 0.00E+0                                                        | 0.00E+0                                     |
| JD166      | 262101      | Hot rolled steel                                            | 熱間圧延鋼材                                                   | 3.96E-3                                                                     | 0.00E+0                                               | 1.92E-3                                             | 2.04E-3                                                        | 6.41E+1                                     |
| JD167      | 262201      | Steel pipes and tubes                                       | 鋼管                                                       | 3.39E-3                                                                     | 0.00E+0                                               | 1.66E-3                                             | 1.73E-3                                                        | 6.12E+1                                     |
| JD168      | 262301      | Cold-finished steel                                         | 冷間仕上げ鋼材                                                  | 4.53E-3                                                                     | 0.00E+0                                               | 2.52E-3                                             | 2.01E-3                                                        | 5.32E+1                                     |
| JD169      | 262302      | Coated steel                                                | めっき鋼材                                                    | 4.48E-3                                                                     | 0.00E+0                                               | 2.57E-3                                             | 1.91E-3                                                        | 5.10E+1                                     |
| JD170      | 263101      | Cast and forged steel                                       | 鍛鋼                                                       | 3.76E-3                                                                     | 0.00E+0                                               | 1.96E-3                                             | 1.79E-3                                                        | 5.78E+1                                     |
| JD171      | 263102      | Cast iron pipes and tubes                                   | 铸铁管                                                      | 4.53E-3                                                                     | 0.00E+0                                               | 2.49E-3                                             | 2.04E-3                                                        | 5.93E+1                                     |
| JD172      | 263103      | Cast and forged materials (iron)                            | 铸铁品及び鍛工品(鉄)                                              | 6.67E-3                                                                     | 0.00E+0                                               | 4.26E-3                                             | 2.21E-3                                                        | 4.07E+1                                     |
| JD173      | 264901      | Iron and steel shearing and slitting                        | 鉄鋼シャースリット業                                               | 3.51E-3                                                                     | 0.00E+0                                               | 1.89E-3                                             | 1.62E-3                                                        | 5.51E+1                                     |
| JD174      | 264909      | Other iron or steel products                                | その他の鉄鋼製品                                                 | 2.92E-3                                                                     | 0.00E+0                                               | 1.53E-3                                             | 1.40E-3                                                        | 5.80E+1                                     |
| JD175      | 271101      | Copper                                                      | 銅                                                        | 4.72E-3                                                                     | 0.00E+0                                               | 1.19E-3                                             | 3.53E-3                                                        | 1.50E+2                                     |
| JD176      | 271102      | Lead and zinc (inc. regenerated lead)                       | 鉛・亜鉛(含再生)                                                | 6.40E-3                                                                     | 0.00E+0                                               | 3.57E-3                                             | 2.83E-3                                                        | 6.38E+1                                     |
| JD177      | 271103      | Aluminum (inc. regenerated aluminum)                        | アルミニウム(含再生)                                              | 5.05E-3                                                                     | 0.00E+0                                               | 1.47E-3                                             | 3.58E-3                                                        | 8.43E+1                                     |
| JD178      | 271109      | Other non-ferrous metals                                    | その他の非鉄金属地金                                               | 4.39E-3                                                                     | 0.00E+0                                               | 1.41E-3                                             | 2.98E-3                                                        | 1.29E+2                                     |
| JD179      | 271201      | Non-ferrous metal scrap                                     | 非鉄金属屑                                                    | 0.00E+0                                                                     | 0.00E+0                                               | 0.00E+0                                             | 0.00E+0                                                        | 0.00E+0                                     |
| JD180      | 272101      | Electric wires and cables                                   | 電線・ケーブル                                                  | 3.95E-3                                                                     | 0.00E+0                                               | 1.33E-3                                             | 2.62E-3                                                        | 8.60E+1                                     |
| JD181      | 272102      | Optical fiber cables                                        | 光ファイバケーブル                                                | 2.11E-2                                                                     | 0.00E+0                                               | 2.60E-3                                             | 1.85E-2                                                        | 1.16E+2                                     |
| JD182      | 272201      | Rolled and drawn copper and copper<br>alloys                | 伸銅品                                                      | 4.43E-3                                                                     | 0.00E+0                                               | 1.52E-3                                             | 2.91E-3                                                        | 8.91E+1                                     |
| JD183      | 272202      | Rolled and drawn aluminum                                   | アルミ圧延製品                                                  | 6.86E-3                                                                     | 0.00E+0                                               | 1.08E-3                                             | 5.78E-3                                                        | 1.34E+2                                     |



Table A8: Embodied global SF<sub>6</sub> intensities of Japanese goods and services based on producer price in 2005 [3/5]

| Sector no. | Sector code | Sector name<br>[Japanese domestic commodity]               | Sector name in Japanese<br>[Japanese domestic commodity] | Embodied global SF <sub>6</sub> intensities based on producer price in 2005 |                                                       |                                                     |                                                                |                                             |
|------------|-------------|------------------------------------------------------------|----------------------------------------------------------|-----------------------------------------------------------------------------|-------------------------------------------------------|-----------------------------------------------------|----------------------------------------------------------------|---------------------------------------------|
|            |             |                                                            |                                                          | Total                                                                       | (D) Direct emissions<br>in Japan during<br>production | (S) Induced<br>emissions in Japan<br>through supply | (F) Induced emissions<br>in foreign country's<br>supply chains | Coefficient of variance<br>of the intensity |
|            |             |                                                            |                                                          | tCO <sub>2</sub> eq/M-JPY                                                   | tCO <sub>2</sub> eq/M-JPY                             | tCO <sub>2</sub> eq/M-JPY                           | tCO <sub>2</sub> eq/M-JPY                                      | %                                           |
| JD184      | 272203      | Non-ferrous metal castings and forgings                    | 非鉄金属素形材                                                  | 9.60E-1                                                                     | 9.44E-1                                               | 1.28E-2                                             | 3.53E-3                                                        | 4.69E-1                                     |
| JD185      | 272204      | Nuclear fuels                                              | 核燃料                                                      | 2.75E-3                                                                     | 0.00E+0                                               | 6.34E-4                                             | 2.12E-3                                                        | 1.31E+2                                     |
| JD186      | 272209      | Other non-ferrous metal products                           | その他の非鉄金属製品                                               | 7.57E-3                                                                     | 0.00E+0                                               | 1.37E-3                                             | 6.20E-3                                                        | 1.34E+2                                     |
| JD187      | 281101      | Metal products for construction                            | 建設用金属製品                                                  | 3.80E-3                                                                     | 0.00E+0                                               | 2.02E-3                                             | 1.78E-3                                                        | 5.48E+1                                     |
| JD188      | 281201      | Metal products for architecture                            | 建築用金属製品                                                  | 3.76E-3                                                                     | 0.00E+0                                               | 1.74E-3                                             | 2.02E-3                                                        | 7.03E+1                                     |
| JD189      | 289101      | Gas and oil appliances and heating and cooking apparatus   | ガス・石油機器及び暖房機器                                            | 6.06E-2                                                                     | 0.00E+0                                               | 5.74E-2                                             | 3.15E-3                                                        | 6.17E+0                                     |
| JD190      | 289901      | Bolts, nuts, rivets and springs                            | ボルト・ナット・リベット及びスプリング                                      | 3.22E-3                                                                     | 0.00E+0                                               | 1.77E-3                                             | 1.45E-3                                                        | 5.36E+1                                     |
| JD191      | 289902      | Metal containers, fabricated plate and sheet metal         | 金属製容器及び製缶板金製品                                            | 5.54E-3                                                                     | 0.00E+0                                               | 4.19E-3                                             | 1.35E-3                                                        | 2.95E+1                                     |
| JD192      | 289903      | Plumber's supplies, powder metallurgy products and tools   | 配管工事付属品・粉末冶金製品・道具類                                       | 1.24E-2                                                                     | 0.00E+0                                               | 1.07E-2                                             | 1.76E-3                                                        | 1.72E+1                                     |
| JD193      | 289909      | Other metal products                                       | その他の金属製品                                                 | 7.33E-3                                                                     | 0.00E+0                                               | 5.97E-3                                             | 1.35E-3                                                        | 2.27E+1                                     |
| JD194      | 301101      | Boilers                                                    | ボイラ                                                      | 7.56E-3                                                                     | 0.00E+0                                               | 5.98E-3                                             | 1.59E-3                                                        | 2.55E+1                                     |
| JD195      | 301102      | Turbines                                                   | タービン                                                     | 1.33E-2                                                                     | 0.00E+0                                               | 9.49E-3                                             | 3.86E-3                                                        | 3.64E+1                                     |
| JD196      | 301103      | Engines                                                    | 原動機                                                      | 4.26E-2                                                                     | 0.00E+0                                               | 3.93E-2                                             | 3.25E-3                                                        | 9.23E+0                                     |
| JD197      | 301201      | Conveyors                                                  | 運搬機械                                                     | 2.38E-2                                                                     | 0.00E+0                                               | 1.08E-2                                             | 1.29E-2                                                        | 7.37E+1                                     |
| JD198      | 301301      | Refrigerators and air conditioning apparatus               | 冷凍機・温湿調整装置                                               | 4.56E-2                                                                     | 0.00E+0                                               | 1.63E-2                                             | 2.93E-2                                                        | 9.09E+1                                     |
| JD199      | 301901      | Pumps and compressors                                      | ポンプ及び圧縮機                                                 | 4.35E-2                                                                     | 0.00E+0                                               | 3.26E-2                                             | 1.09E-2                                                        | 3.42E+1                                     |
| JD200      | 301902      | Machinists' precision tools                                | 機械工具                                                     | 2.88E-2                                                                     | 0.00E+0                                               | 2.65E-2                                             | 2.30E-3                                                        | 9.88E+0                                     |
| JD201      | 301909      | Other general industrial machinery and equipment           | その他の一般産業機械及び装置                                           | 1.14E-2                                                                     | 0.00E+0                                               | 8.33E-3                                             | 3.03E-3                                                        | 3.32E+1                                     |
| JD202      | 302101      | Machinery and equipment for construction and mining        | 建設・鉱山機械                                                  | 1.28E-2                                                                     | 0.00E+0                                               | 9.74E-3                                             | 3.02E-3                                                        | 3.00E+1                                     |
| JD203      | 302201      | Chemical machinery                                         | 化学機械                                                     | 9.75E-3                                                                     | 0.00E+0                                               | 6.97E-3                                             | 2.78E-3                                                        | 3.46E+1                                     |
| JD204      | 302301      | Industrial robots                                          | 産業用ロボット                                                  | 3.44E-2                                                                     | 0.00E+0                                               | 2.10E-2                                             | 1.33E-2                                                        | 5.13E+1                                     |
| JD205      | 302401      | Metal machine tools                                        | 金属工作機械                                                   | 2.46E-2                                                                     | 0.00E+0                                               | 1.92E-2                                             | 5.43E-3                                                        | 2.73E+1                                     |
| JD206      | 302402      | Metal processing machinery                                 | 金属加工機械                                                   | 1.35E-2                                                                     | 0.00E+0                                               | 1.15E-2                                             | 1.99E-3                                                        | 1.76E+1                                     |
| JD207      | 302901      | Machinery for agricultural use                             | 農業用機械                                                    | 1.92E-2                                                                     | 0.00E+0                                               | 1.69E-2                                             | 2.27E-3                                                        | 1.44E+1                                     |
| JD208      | 302902      | Textile machinery                                          | 繊維機械                                                     | 3.03E-2                                                                     | 0.00E+0                                               | 2.64E-2                                             | 3.92E-3                                                        | 1.75E+1                                     |
| JD209      | 302903      | Food processing machinery and equipment                    | 食品機械・同装置                                                 | 1.96E-2                                                                     | 0.00E+0                                               | 1.55E-2                                             | 4.11E-3                                                        | 2.66E+1                                     |
| JD210      | 302904      | Semiconductor making equipment                             | 半導体製造装置                                                  | 1.49E-2                                                                     | 0.00E+0                                               | 1.06E-2                                             | 4.33E-3                                                        | 4.35E+1                                     |
| JD211      | 302905      | Vacuum equipment and vacuum component                      | 真空装置・真空機器                                                | 3.30E-2                                                                     | 0.00E+0                                               | 2.49E-2                                             | 8.04E-3                                                        | 3.31E+1                                     |
| JD212      | 302909      | Other special machinery for industrial use                 | その他の特殊産業用機械                                              | 2.06E-2                                                                     | 0.00E+0                                               | 1.58E-2                                             | 4.86E-3                                                        | 2.92E+1                                     |
| JD213      | 303101      | Metal molds                                                | 金型                                                       | 1.34E-2                                                                     | 0.00E+0                                               | 1.23E-2                                             | 1.12E-3                                                        | 9.97E+0                                     |
| JD214      | 303102      | Bearings                                                   | ベアリング                                                    | 5.01E-3                                                                     | 0.00E+0                                               | 3.34E-3                                             | 1.68E-3                                                        | 3.99E+1                                     |
| JD215      | 303109      | Other general machines and parts                           | その他の一般機械器具及び部品                                           | 4.65E-2                                                                     | 0.00E+0                                               | 4.45E-2                                             | 1.97E-3                                                        | 4.91E+0                                     |
| JD216      | 311101      | Copy machine                                               | 複写機                                                      | 5.72E-2                                                                     | 0.00E+0                                               | 1.98E-2                                             | 3.75E-2                                                        | 8.90E+1                                     |
| JD217      | 311109      | Other office machines                                      | その他の事務用機械                                                | 5.89E-2                                                                     | 0.00E+0                                               | 2.83E-2                                             | 3.06E-2                                                        | 6.86E+1                                     |
| JD218      | 311201      | Machinery for service industry                             | サービス用機器                                                  | 6.37E-2                                                                     | 0.00E+0                                               | 4.29E-2                                             | 2.08E-2                                                        | 4.29E+1                                     |
| JD219      | 321101      | Rotating electrical equipment                              | 回転電気機械                                                   | 6.37E-2                                                                     | 0.00E+0                                               | 4.36E-2                                             | 2.00E-2                                                        | 4.07E+1                                     |
| JD220      | 321102      | Transformers and reactors                                  | 変圧器・変成器                                                  | 1.34E-1                                                                     | 1.05E-1                                               | 1.47E-1                                             | 1.40E-2                                                        | 1.59E+1                                     |
| JD221      | 321103      | Relay switches and switchboards                            | 開閉制御装置及び配電盤                                              | 5.36E-1                                                                     | 4.85E-1                                               | 3.03E-2                                             | 2.04E-2                                                        | 4.92E+0                                     |
| JD222      | 321104      | Wiring devices and supplies                                | 配線器具                                                     | 5.69E-2                                                                     | 0.00E+0                                               | 7.06E-3                                             | 4.99E-2                                                        | 1.33E+2                                     |
| JD223      | 321105      | Electrical equipment for internal combustion engines       | 内燃機関電装品                                                  | 3.85E-2                                                                     | 0.00E+0                                               | 2.66E-2                                             | 1.19E-2                                                        | 3.99E+1                                     |
| JD224      | 321109      | Other electrical devices and parts                         | その他の産業用電気機器                                              | 5.61E-2                                                                     | 0.00E+0                                               | 3.70E-2                                             | 1.90E-2                                                        | 4.38E+1                                     |
| JD225      | 322101      | Applied electronic equipment                               | 電子応用装置                                                   | 9.06E-2                                                                     | 0.00E+0                                               | 2.81E-2                                             | 6.24E-2                                                        | 9.20E+1                                     |
| JD226      | 323101      | Electric measuring instruments                             | 電気計測器                                                    | 7.95E-2                                                                     | 0.00E+0                                               | 2.18E-2                                             | 5.77E-2                                                        | 9.49E+1                                     |
| JD227      | 324101      | Electric bulbs                                             | 電球類                                                      | 3.98E-2                                                                     | 0.00E+0                                               | 2.56E-3                                             | 3.72E-2                                                        | 1.38E+2                                     |
| JD228      | 324102      | Electric lighting fixtures and apparatus                   | 電気照明器具                                                   | 8.54E-2                                                                     | 0.00E+0                                               | 1.03E-2                                             | 7.51E-2                                                        | 1.37E+2                                     |
| JD229      | 324103      | Batteries                                                  | 電池                                                       | 1.89E-2                                                                     | 0.00E+0                                               | 9.14E-3                                             | 9.79E-3                                                        | 6.69E+1                                     |
| JD230      | 324109      | Other electrical devices and parts                         | その他の電気機械器具                                               | 2.11E-2                                                                     | 0.00E+0                                               | 9.52E-3                                             | 1.16E-2                                                        | 7.41E+1                                     |
| JD231      | 325101      | Household air-conditioners                                 | 民生用エアコンディショナ                                             | 4.77E-2                                                                     | 0.00E+0                                               | 2.36E-2                                             | 2.41E-2                                                        | 6.64E+1                                     |
| JD232      | 325102      | Household electric appliances (except air-conditioners)    | 民生用電気機器(除エアコン)                                           | 5.75E-2                                                                     | 0.00E+0                                               | 3.01E-2                                             | 2.74E-2                                                        | 6.23E+1                                     |
| JD233      | 331101      | Video recording and playback equipment                     | ビデオ機器                                                    | 9.37E-2                                                                     | 0.00E+0                                               | 5.31E-2                                             | 4.06E-2                                                        | 5.90E+1                                     |
| JD234      | 331102      | Electric audio equipment                                   | 電気音響機器                                                   | 6.42E-2                                                                     | 0.00E+0                                               | 2.60E-2                                             | 3.82E-2                                                        | 8.02E+1                                     |
| JD235      | 331103      | Radio and television sets                                  | ラジオ・テレビ受信機                                               | 1.47E-1                                                                     | 0.00E+0                                               | 1.11E-1                                             | 3.59E-2                                                        | 3.27E+1                                     |
| JD236      | 332101      | Wired communication equipment                              | 有線電気通信機器                                                 | 4.43E-2                                                                     | 0.00E+0                                               | 1.58E-2                                             | 2.86E-2                                                        | 8.79E+1                                     |
| JD237      | 332102      | Cellular phones                                            | 携帯電話機                                                    | 8.44E-2                                                                     | 0.00E+0                                               | 4.69E-2                                             | 3.74E-2                                                        | 6.03E+1                                     |
| JD238      | 332103      | Radio communication equipment (except cellular phones)     | 無線電気通信機器(除携帯電話機)                                         | 7.04E-2                                                                     | 0.00E+0                                               | 3.34E-2                                             | 3.70E-2                                                        | 7.31E+1                                     |
| JD239      | 332109      | Other communication equipment                              | その他の電気通信機器                                               | 4.14E-2                                                                     | 0.00E+0                                               | 1.31E-2                                             | 2.83E-2                                                        | 9.27E+1                                     |
| JD240      | 333101      | Personal Computers                                         | パーソナルコンピュータ                                              | 1.10E-1                                                                     | 0.00E+0                                               | 5.06E-2                                             | 5.95E-2                                                        | 7.43E+1                                     |
| JD241      | 333102      | Electronic computing equipment (except personal computers) | 電子計算機本体(除パソコン)                                           | 7.29E-2                                                                     | 0.00E+0                                               | 1.64E-2                                             | 5.65E-2                                                        | 1.07E+2                                     |
| JD242      | 333103      | Electronic computing equipment (accessory equipment)       | 電子計算機付属装置                                                | 9.28E-2                                                                     | 0.00E+0                                               | 4.79E-2                                             | 4.48E-2                                                        | 6.62E+1                                     |
| JD243      | 341101      | Semiconductor devices                                      | 半導体素子                                                    | 1.07E+0                                                                     | 1.05E+0                                               | 3.33E-3                                             | 1.28E-2                                                        | 1.63E+0                                     |
| JD244      | 341102      | Integrated circuits                                        | 集積回路                                                     | 3.89E-2                                                                     | 0.00E+0                                               | 1.06E-2                                             | 2.83E-2                                                        | 9.71E+1                                     |
| JD245      | 342101      | Electron tubes                                             | 電子管                                                      | 7.38E-3                                                                     | 0.00E+0                                               | 2.51E-3                                             | 4.88E-3                                                        | 8.29E+1                                     |
| JD246      | 342102      | Liquid crystal element                                     | 液晶素子                                                     | 5.81E-1                                                                     | 5.07E-1                                               | 2.09E-2                                             | 5.30E-2                                                        | 1.25E+1                                     |
| JD247      | 342103      | Magnetic tapes and discs                                   | 磁気テープ・磁気ディスク                                             | 5.11E-3                                                                     | 0.00E+0                                               | 2.56E-3                                             | 2.55E-3                                                        | 6.42E+1                                     |
| JD248      | 342109      | Other electronic components                                | その他の電子部品                                                 | 3.29E-2                                                                     | 0.00E+0                                               | 6.71E-3                                             | 2.62E-2                                                        | 1.11E+2                                     |
| JD249      | 351101      | Passenger motor cars                                       | 乗用車                                                      | 2.47E-2                                                                     | 0.00E+0                                               | 1.96E-2                                             | 5.11E-3                                                        | 2.59E+1                                     |
| JD250      | 352101      | Trucks, buses and other cars                               | トラック・バス・その他の自動車                                          | 2.42E-2                                                                     | 0.00E+0                                               | 1.97E-2                                             | 4.55E-3                                                        | 2.30E+1                                     |
| JD251      | 353101      | Two-wheel motor vehicles                                   | 二輪自動車                                                    | 2.39E-2                                                                     | 0.00E+0                                               | 1.86E-2                                             | 5.37E-3                                                        | 2.91E+1                                     |
| JD252      | 354101      | Motor vehicle bodies                                       | 自動車車体                                                    | 2.15E-2                                                                     | 0.00E+0                                               | 1.86E-2                                             | 2.89E-3                                                        | 1.62E+1                                     |
| JD253      | 354102      | Internal combustion engines for motor vehicles and parts   | 自動車用内燃機関・同部分品                                            | 4.78E-2                                                                     | 0.00E+0                                               | 4.24E-2                                             | 5.40E-3                                                        | 1.42E+1                                     |
| JD254      | 354103      | Motor vehicle parts and accessories                        | 自動車部品                                                    | 3.28E-2                                                                     | 0.00E+0                                               | 2.91E-2                                             | 3.65E-3                                                        | 1.33E+1                                     |
| JD255      | 361101      | Steel ships                                                | 鋼船                                                       | 1.27E-2                                                                     | 0.00E+0                                               | 8.09E-3                                             | 4.64E-3                                                        | 4.48E+1                                     |
| JD256      | 361102      | Ships (except steel ships)                                 | その他の船舶                                                   | 1.39E-2                                                                     | 0.00E+0                                               | 8.73E-3                                             | 5.17E-3                                                        | 4.55E+1                                     |
| JD257      | 361103      | Internal combustion engines for vessels                    | 船用内燃機関                                                   | 2.92E-2                                                                     | 0.00E+0                                               | 2.57E-2                                             | 3.53E-3                                                        | 1.45E+1                                     |
| JD258      | 361110      | Repair of ships                                            | 船舶修理                                                     | 1.04E-2                                                                     | 0.00E+0                                               | 8.22E-3                                             | 2.15E-3                                                        | 2.44E+1                                     |
| JD259      | 362101      | Rolling stock                                              | 鉄道車両                                                     | 1.43E-2                                                                     | 0.00E+0                                               | 1.07E-2                                             | 3.61E-3                                                        | 3.00E+1                                     |
| JD260      | 362110      | Repair of rolling stock                                    | 鉄道車両修理                                                   | 1.11E-2                                                                     | 0.00E+0                                               | 8.25E-3                                             | 2.84E-3                                                        | 3.05E+1                                     |
| JD261      | 362201      | Aircrafts                                                  | 航空機                                                      | 1.49E-2                                                                     | 0.00E+0                                               | 1.00E-2                                             | 4.86E-3                                                        | 4.60E+1                                     |
| JD262      | 362210      | Repair of aircrafts                                        | 航空機修理                                                    | 1.41E-2                                                                     | 0.00E+0                                               | 2.30E-3                                             | 1.18E-2                                                        | 1.38E+2                                     |
| JD263      | 362901      | Bicycles                                                   | 自転車                                                      | 1.55E-2                                                                     | 0.00E+0                                               | 1.23E-2                                             | 3.18E-3                                                        | 2.56E+1                                     |
| JD264      | 362909      | Other transport equipment                                  | その他の輸送機械                                                 | 1.25E-2                                                                     | 0.00E+0                                               | 1.02E-2                                             | 2.34E-3                                                        | 2.22E+1                                     |
| JD265      | 371101      | Camera                                                     | カメラ                                                      | 7.79E-2                                                                     | 0.00E+0                                               | 4.45E-2                                             | 3.34E-2                                                        | 6.11E+1                                     |
| JD266      | 371109      | Other photographic and optical instruments                 | その他の光学機械                                                 | 1.74E-2                                                                     | 0.00E+0                                               | 1.01E-2                                             | 7.25E-3                                                        | 7.19E+1                                     |

Table A8: Embodied global SF<sub>6</sub> intensities of Japanese goods and services based on producer price in 2005 [4/5]

| Sector no. | Sector code | Sector name<br>[Japanese domestic commodity]                   | Sector name in Japanese<br>[Japanese domestic commodity] | Embodied global SF <sub>6</sub> intensities based on producer price in 2005 |                                                       |                                                     |                                                                |                                             |
|------------|-------------|----------------------------------------------------------------|----------------------------------------------------------|-----------------------------------------------------------------------------|-------------------------------------------------------|-----------------------------------------------------|----------------------------------------------------------------|---------------------------------------------|
|            |             |                                                                |                                                          | Total                                                                       | (D) Direct emissions<br>in Japan during<br>production | (S) Induced<br>emissions in Japan<br>through supply | (F) Induced emissions<br>in foreign country's<br>supply chains | Coefficient of variance<br>of the intensity |
|            |             |                                                                |                                                          | tCO <sub>2</sub> eq/M-JPY                                                   | tCO <sub>2</sub> eq/M-JPY                             | tCO <sub>2</sub> eq/M-JPY                           | tCO <sub>2</sub> eq/M-JPY                                      | %                                           |
| JD267      | 371201      | Watches and clocks                                             | 時計                                                       | 3.48E-2                                                                     | 0.00E+0                                               | 2.48E-2                                             | 1.00E-2                                                        | 3.67E+1                                     |
| JD268      | 371901      | Professional and scientific instruments                        | 理化学機械器具                                                  | 8.76E-3                                                                     | 0.00E+0                                               | 5.70E-3                                             | 3.06E-3                                                        | 4.30E+1                                     |
| JD269      | 371902      | Analytical instruments, testing machine, measuring instruments | 分析器・試験機・計量器・測定器                                          | 5.67E-2                                                                     | 0.00E+0                                               | 4.08E-2                                             | 1.59E-2                                                        | 3.71E+1                                     |
| JD270      | 371903      | Medical instruments                                            | 医療用機械器具                                                  | 5.86E-2                                                                     | 0.00E+0                                               | 4.16E-2                                             | 1.71E-2                                                        | 3.79E+1                                     |
| JD271      | 391101      | Toys and games                                                 | がん具                                                      | 4.92E-2                                                                     | 0.00E+0                                               | 3.03E-2                                             | 1.89E-2                                                        | 5.15E+1                                     |
| JD272      | 391102      | Sporting and athletic goods                                    | 運動用品                                                     | 9.01E-3                                                                     | 0.00E+0                                               | 6.88E-3                                             | 2.14E-3                                                        | 2.97E+1                                     |
| JD273      | 391901      | Musical instruments                                            | 楽器                                                       | 2.00E-2                                                                     | 0.00E+0                                               | 1.44E-2                                             | 5.60E-3                                                        | 3.51E+1                                     |
| JD274      | 391902      | Audio and video records, other information recording media     | 情報記録物                                                    | 2.78E-3                                                                     | 0.00E+0                                               | 1.22E-3                                             | 1.56E-3                                                        | 7.26E+1                                     |
| JD275      | 391903      | Stationery                                                     | 筆記具・文具                                                   | 3.41E-3                                                                     | 0.00E+0                                               | 1.84E-3                                             | 1.58E-3                                                        | 5.99E+1                                     |
| JD276      | 391904      | Jewelry and adornments                                         | 身辺細貨品                                                    | 3.47E-3                                                                     | 0.00E+0                                               | 9.65E-4                                             | 2.51E-3                                                        | 8.56E+1                                     |
| JD277      | 391905      | "Tatami" (straw matting) and straw products                    | 畳・わら加工品                                                  | 1.36E-3                                                                     | 0.00E+0                                               | 4.88E-4                                             | 8.67E-4                                                        | 7.90E+1                                     |
| JD278      | 391906      | Ordnance                                                       | 武器                                                       | 2.42E-2                                                                     | 0.00E+0                                               | 2.07E-2                                             | 3.57E-3                                                        | 1.74E+1                                     |
| JD279      | 391909      | Miscellaneous manufacturing products                           | その他の製造工業製品                                               | 3.20E-3                                                                     | 0.00E+0                                               | 1.50E-3                                             | 1.70E-3                                                        | 6.65E+1                                     |
| JD280      | 392101      | Reuse and recycling                                            | 再生资源回収・加工処理                                              | 2.79E-3                                                                     | 0.00E+0                                               | 1.11E-3                                             | 1.68E-3                                                        | 9.09E+1                                     |
| JD281      | 411101      | Residential construction (wooden)                              | 住宅建築(木造)                                                 | 3.30E-3                                                                     | 0.00E+0                                               | 1.61E-3                                             | 1.69E-3                                                        | 6.12E+1                                     |
| JD282      | 411102      | Residential construction (non-wooden)                          | 住宅建築(非木造)                                                | 3.99E-3                                                                     | 0.00E+0                                               | 1.95E-3                                             | 2.04E-3                                                        | 6.07E+1                                     |
| JD283      | 411201      | Non-residential construction (wooden)                          | 非住宅建築(木造)                                                | 5.36E-3                                                                     | 0.00E+0                                               | 3.15E-3                                             | 2.21E-3                                                        | 4.90E+1                                     |
| JD284      | 411202      | Non-residential construction (non-wooden)                      | 非住宅建築(非木造)                                               | 5.40E-3                                                                     | 0.00E+0                                               | 3.03E-3                                             | 2.36E-3                                                        | 5.21E+1                                     |
| JD285      | 412101      | Repair of construction                                         | 建設補修                                                     | 5.05E-3                                                                     | 0.00E+0                                               | 2.97E-3                                             | 2.08E-3                                                        | 4.90E+1                                     |
| JD286      | 413101      | Public construction of roads                                   | 道路関係公共事業                                                 | 2.95E-3                                                                     | 0.00E+0                                               | 1.00E-3                                             | 1.95E-3                                                        | 8.99E+1                                     |
| JD287      | 413102      | Public construction of rivers, drainages and others            | 河川・下水道・その他の公共事業                                          | 5.77E-3                                                                     | 0.00E+0                                               | 3.39E-3                                             | 2.38E-3                                                        | 4.99E+1                                     |
| JD288      | 413103      | Agricultural public construction                               | 農林関係公共事業                                                 | 3.30E-3                                                                     | 0.00E+0                                               | 1.35E-3                                             | 1.95E-3                                                        | 7.96E+1                                     |
| JD289      | 413201      | Railway construction                                           | 鉄道軌道建設                                                   | 3.52E-3                                                                     | 0.00E+0                                               | 1.61E-3                                             | 1.91E-3                                                        | 6.53E+1                                     |
| JD290      | 413202      | Electric power facilities construction                         | 電力施設建設                                                   | 1.10E-2                                                                     | 0.00E+0                                               | 8.05E-3                                             | 2.96E-3                                                        | 3.21E+1                                     |
| JD291      | 413203      | Telecommunication facilities construction                      | 電気通信施設建設                                                 | 1.36E-2                                                                     | 0.00E+0                                               | 2.51E-3                                             | 1.11E-2                                                        | 1.09E+2                                     |
| JD292      | 413209      | Other civil engineering and construction                       | その他の土木建設                                                 | 4.66E-3                                                                     | 0.00E+0                                               | 2.63E-3                                             | 2.03E-3                                                        | 5.30E+1                                     |
| JD293      | 5111001     | Electricity                                                    | 事業用電力                                                    | 3.08E-2                                                                     | 2.36E-2                                               | 2.19E-3                                             | 5.03E-3                                                        | 2.34E+1                                     |
| JD294      | 511104      | On-site power generation                                       | 自家発電                                                     | 5.13E-2                                                                     | 4.45E-2                                               | 8.79E-4                                             | 5.91E-3                                                        | 1.78E+1                                     |
| JD295      | 512101      | Gas supply                                                     | 都市ガス                                                     | 7.64E-3                                                                     | 0.00E+0                                               | 1.26E-3                                             | 6.38E-3                                                        | 1.62E+2                                     |
| JD296      | 512201      | Steam and hot water supply                                     | 熱供給業                                                     | 8.35E-3                                                                     | 0.00E+0                                               | 4.36E-3                                             | 3.99E-3                                                        | 6.77E+1                                     |
| JD297      | 521101      | Water supply                                                   | 上水道・簡易水道                                                 | 1.87E-3                                                                     | 0.00E+0                                               | 1.09E-3                                             | 7.78E-4                                                        | 5.07E+1                                     |
| JD298      | 521102      | Industrial water supply                                        | 工業用水                                                     | 2.71E-3                                                                     | 0.00E+0                                               | 1.63E-3                                             | 1.09E-3                                                        | 4.83E+1                                     |
| JD299      | 521103      | Sewage disposal **                                             | 下水道★★                                                    | 9.80E-3                                                                     | 0.00E+0                                               | 5.13E-3                                             | 4.67E-3                                                        | 6.08E+1                                     |
| JD300      | 521201      | Waste management services (public) **                          | 廃棄物処理(公営)★★                                              | 4.15E-3                                                                     | 0.00E+0                                               | 2.28E-3                                             | 1.87E-3                                                        | 5.88E+1                                     |
| JD301      | 521202      | Waste management services (private)                            | 廃棄物処理(産業)                                                | 2.47E-3                                                                     | 0.00E+0                                               | 1.24E-3                                             | 1.23E-3                                                        | 6.44E+1                                     |
| JD302      | 611101      | Wholesale trade                                                | 卸売                                                       | 1.36E-3                                                                     | 0.00E+0                                               | 5.63E-4                                             | 7.93E-4                                                        | 7.67E+1                                     |
| JD303      | 611201      | Retail trade                                                   | 小売                                                       | 2.25E-3                                                                     | 0.00E+0                                               | 1.25E-3                                             | 1.00E-3                                                        | 6.11E+1                                     |
| JD304      | 621101      | Financial service                                              | 金融                                                       | 1.17E-3                                                                     | 0.00E+0                                               | 4.21E-4                                             | 7.49E-4                                                        | 9.25E+1                                     |
| JD305      | 621201      | Life insurance                                                 | 生命保険                                                     | 1.07E-3                                                                     | 0.00E+0                                               | 4.59E-4                                             | 6.11E-4                                                        | 7.07E+1                                     |
| JD306      | 621202      | Non-life insurance                                             | 損害保険                                                     | 9.32E-4                                                                     | 0.00E+0                                               | 4.68E-4                                             | 4.64E-4                                                        | 6.20E+1                                     |
| JD307      | 641101      | Real estate agencies and managers                              | 不動産仲介・管理業                                                | 1.34E-3                                                                     | 0.00E+0                                               | 7.75E-4                                             | 5.65E-4                                                        | 5.23E+1                                     |
| JD308      | 641102      | Real estate rental service                                     | 不動産賃貸業                                                   | 1.11E-3                                                                     | 0.00E+0                                               | 7.00E-4                                             | 4.12E-4                                                        | 4.96E+1                                     |
| JD309      | 642101      | House rent                                                     | 住宅賃貸料                                                    | 7.16E-4                                                                     | 0.00E+0                                               | 3.52E-4                                             | 3.63E-4                                                        | 6.21E+1                                     |
| JD310      | 642201      | House rent (imputed house rent)                                | 住宅賃貸料(帰属家賃)                                              | 3.38E-4                                                                     | 0.00E+0                                               | 1.78E-4                                             | 1.60E-4                                                        | 5.64E+1                                     |
| JD311      | 711101      | Railway transport (passengers)                                 | 鉄道旅客輸送                                                   | 3.23E-3                                                                     | 0.00E+0                                               | 2.26E-3                                             | 9.73E-4                                                        | 3.80E+1                                     |
| JD312      | 711201      | Railway transport (freight)                                    | 鉄道貨物輸送                                                   | 5.22E-3                                                                     | 0.00E+0                                               | 3.50E-3                                             | 1.72E-3                                                        | 4.44E+1                                     |
| JD313      | 712101      | Bus transport service                                          | バス                                                       | 3.31E-3                                                                     | 0.00E+0                                               | 9.44E-4                                             | 2.37E-3                                                        | 1.09E+2                                     |
| JD314      | 712102      | Hired car and taxi transport                                   | ハイヤー・タクシー                                                | 2.95E-3                                                                     | 0.00E+0                                               | 6.34E-4                                             | 2.32E-3                                                        | 1.17E+2                                     |
| JD315      | 712201      | Road freight transport(except Self-transport by private cars)  | 道路貨物輸送(除自家輸送)                                            | 3.69E-3                                                                     | 0.00E+0                                               | 9.04E-4                                             | 2.79E-3                                                        | 1.18E+2                                     |
| JD316      | 713101      | Self-transport by private cars (passengers)                    | 自家輸送(旅客自動車)                                              | 1.36E-2                                                                     | 0.00E+0                                               | 2.84E-3                                             | 1.08E-2                                                        | 1.26E+2                                     |
| JD317      | 713201      | Self-transport by private cars (freight)                       | 自家輸送(貨物自動車)                                              | 1.23E-2                                                                     | 0.00E+0                                               | 2.95E-3                                             | 9.39E-3                                                        | 1.20E+2                                     |
| JD318      | 714101      | Ocean transport                                                | 外洋輸送                                                     | 1.13E-2                                                                     | 0.00E+0                                               | 5.83E-4                                             | 1.07E-2                                                        | 1.56E+2                                     |
| JD319      | 714201      | Coastal and inland water transport                             | 沿海・内水面輸送                                                 | 5.62E-3                                                                     | 0.00E+0                                               | 1.08E-3                                             | 4.54E-3                                                        | 1.26E+2                                     |
| JD320      | 714301      | Harbor transport service                                       | 港湾運送                                                     | 1.55E-3                                                                     | 0.00E+0                                               | 6.01E-4                                             | 9.47E-4                                                        | 8.36E+1                                     |
| JD321      | 715101      | Air transport                                                  | 航空輸送                                                     | 7.39E-3                                                                     | 0.00E+0                                               | 1.20E-3                                             | 6.19E-3                                                        | 9.94E+1                                     |
| JD322      | 716101      | Consigned freight forwarding                                   | 貨物利用運送                                                   | 2.09E-3                                                                     | 0.00E+0                                               | 9.50E-4                                             | 1.14E-3                                                        | 7.21E+1                                     |
| JD323      | 717101      | Storage facility service                                       | 倉庫                                                       | 2.83E-3                                                                     | 0.00E+0                                               | 1.93E-3                                             | 9.03E-4                                                        | 3.97E+1                                     |
| JD324      | 718101      | Packing service                                                | こん包                                                      | 1.96E-3                                                                     | 0.00E+0                                               | 9.66E-4                                             | 9.90E-4                                                        | 6.40E+1                                     |
| JD325      | 718901      | Facility service for road transport                            | 道路輸送施設提供                                                 | 1.72E-3                                                                     | 0.00E+0                                               | 1.09E-3                                             | 6.26E-4                                                        | 4.49E+1                                     |
| JD326      | 718902      | Port and water traffic control **                              | 水運施設管理★★                                                 | 1.94E-3                                                                     | 0.00E+0                                               | 9.08E-4                                             | 1.03E-3                                                        | 6.75E+1                                     |
| JD327      | 718903      | Services relating to water transport                           | その他の水運付帯サービス                                             | 7.82E-4                                                                     | 0.00E+0                                               | 3.54E-4                                             | 4.27E-4                                                        | 6.76E+1                                     |
| JD328      | 718904      | Airport and air traffic control (public) **                    | 航空施設管理(国営)★★                                             | 3.95E-3                                                                     | 0.00E+0                                               | 2.01E-3                                             | 1.94E-3                                                        | 5.92E+1                                     |
| JD329      | 718905      | Airport and air traffic control                                | 航空施設管理(産業)                                               | 3.40E-3                                                                     | 0.00E+0                                               | 1.91E-3                                             | 1.50E-3                                                        | 5.36E+1                                     |
| JD330      | 718906      | Services relating to air transport                             | その他の航空付帯サービス                                             | 1.74E-3                                                                     | 0.00E+0                                               | 9.01E-4                                             | 8.41E-4                                                        | 5.86E+1                                     |
| JD331      | 718909      | Travel agency and other services relating to transport         | 旅行・その他の運輸付帯サービス                                          | 1.25E-3                                                                     | 0.00E+0                                               | 5.63E-4                                             | 6.87E-4                                                        | 6.79E+1                                     |
| JD332      | 731101      | Postal service*                                                | 郵便・信書便                                                   | 1.10E-3                                                                     | 0.00E+0                                               | 4.26E-4                                             | 6.70E-4                                                        | 8.65E+1                                     |
| JD333      | 731201      | Fixed telecommunication                                        | 固定電気通信                                                   | 1.52E-3                                                                     | 0.00E+0                                               | 7.10E-4                                             | 8.08E-4                                                        | 7.23E+1                                     |
| JD334      | 731202      | Mobile telecommunication                                       | 移動電気通信                                                   | 1.18E-3                                                                     | 0.00E+0                                               | 5.49E-4                                             | 6.34E-4                                                        | 6.55E+1                                     |
| JD335      | 731203      | Other telecommunication                                        | その他の電気通信                                                 | 1.93E-3                                                                     | 0.00E+0                                               | 9.72E-4                                             | 9.61E-4                                                        | 6.23E+1                                     |
| JD336      | 731909      | Other services relating to communication                       | その他の通信サービス                                               | 2.08E-3                                                                     | 0.00E+0                                               | 1.08E-3                                             | 9.97E-4                                                        | 5.81E+1                                     |
| JD337      | 732101      | Public broadcasting                                            | 公共放送                                                     | 2.46E-3                                                                     | 0.00E+0                                               | 1.13E-3                                             | 1.33E-3                                                        | 6.58E+1                                     |
| JD338      | 732102      | Private broadcasting                                           | 民間放送                                                     | 2.28E-3                                                                     | 0.00E+0                                               | 6.72E-4                                             | 1.61E-3                                                        | 9.59E+1                                     |
| JD339      | 732103      | Cable broadcasting                                             | 有線放送                                                     | 1.92E-3                                                                     | 0.00E+0                                               | 8.83E-4                                             | 1.04E-3                                                        | 6.60E+1                                     |
| JD340      | 733101      | Information services                                           | 情報サービス                                                   | 1.44E-3                                                                     | 0.00E+0                                               | 6.56E-4                                             | 7.80E-4                                                        | 6.66E+1                                     |
| JD341      | 734101      | Internet based services                                        | インターネット附随サービス                                            | 1.82E-3                                                                     | 0.00E+0                                               | 8.99E-4                                             | 9.25E-4                                                        | 6.29E+1                                     |
| JD342      | 735101      | Image information production and distribution industry         | 映像情報制作・配給業                                               | 4.56E-3                                                                     | 0.00E+0                                               | 8.10E-4                                             | 3.75E-3                                                        | 1.32E+2                                     |
| JD343      | 735102      | Newspaper                                                      | 新聞                                                       | 2.41E-3                                                                     | 0.00E+0                                               | 1.24E-3                                             | 1.17E-3                                                        | 5.94E+1                                     |
| JD344      | 735103      | Publication                                                    | 出版                                                       | 2.04E-3                                                                     | 0.00E+0                                               | 1.03E-3                                             | 1.00E-3                                                        | 6.17E+1                                     |
| JD345      | 735104      | News syndicates and private detective agencies                 | ニュース供給・興信所                                               | 1.46E-3                                                                     | 0.00E+0                                               | 5.62E-4                                             | 8.98E-4                                                        | 7.59E+1                                     |
| JD346      | 811101      | Public administration (central) **                             | 公務(中央)★★                                                 | 4.97E-3                                                                     | 0.00E+0                                               | 2.03E-3                                             | 2.95E-3                                                        | 7.55E+1                                     |
| JD347      | 811201      | Public administration (local) **                               | 公務(地方)★★                                                 | 1.41E-3                                                                     | 0.00E+0                                               | 6.88E-4                                             | 7.26E-4                                                        | 6.84E+1                                     |
| JD348      | 821101      | School education (public) **                                   | 学校教育(国公立)★★                                              | 7.62E-4                                                                     | 0.00E+0                                               | 4.26E-4                                             | 3.36E-4                                                        | 5.70E+1                                     |
| JD349      | 821102      | School education (private) *                                   | 学校教育(私立)★                                                | 1.53E-3                                                                     | 0.00E+0                                               | 7.13E-4                                             | 8.13E-4                                                        | 6.65E+1                                     |
| JD350      | 821301      | Social education (public) **                                   | 社会教育(国公立)★★                                              | 1.94E-3                                                                     | 0.00E+0                                               | 1.11E-3                                             | 8.33E-4                                                        | 5.50E+1                                     |
| JD351      | 821302      | Social education (private, non-profit) *                       | 社会教育(非営利)★                                               | 3.09E-3                                                                     | 0.00E+0                                               | 1.74E-3                                             | 1.35E-3                                                        | 5.68E+1                                     |
| JD352      | 821303      | Other educational and training institutions (public) **        | その他の教育訓練機関(国公立)★★                                        | 3.62E-3                                                                     | 0.00E+0                                               | 1.40E-3                                             | 2.23E-3                                                        | 8.69E+1                                     |

Table A8: Embodied global SF<sub>6</sub> intensities of Japanese goods and services based on producer price in 2005 [5/5]

| Sector no. | Sector code | Sector name<br>[Japanese domestic commodity]                                                | Sector name in Japanese<br>[Japanese domestic commodity] | Embodied global SF <sub>6</sub> intensities based on producer price in 2005 |                                                       |                                                     |                                                                |                                             |
|------------|-------------|---------------------------------------------------------------------------------------------|----------------------------------------------------------|-----------------------------------------------------------------------------|-------------------------------------------------------|-----------------------------------------------------|----------------------------------------------------------------|---------------------------------------------|
|            |             |                                                                                             |                                                          | Total                                                                       | (D) Direct emissions<br>in Japan during<br>production | (S) Induced<br>emissions in Japan<br>through supply | (F) Induced emissions<br>in foreign country's<br>supply chains | Coefficient of variance<br>of the intensity |
|            |             |                                                                                             |                                                          | tCO <sub>2</sub> eq/M-JPY                                                   | tCO <sub>2</sub> eq/M-JPY                             | tCO <sub>2</sub> eq/M-JPY                           | tCO <sub>2</sub> eq/M-JPY                                      | %                                           |
| JD353      | 821304      | Other educational and training institutions (profit-making)                                 | その他の教育訓練機関(産業)                                           | 2.55E-3                                                                     | 0.00E+0                                               | 8.45E-4                                             | 1.71E-3                                                        | 9.33E+1                                     |
| JD354      | 822101      | Research institutes for natural science (public) **                                         | 自然科学研究機関(国公立)★★                                          | 3.53E-3                                                                     | 0.00E+0                                               | 1.88E-3                                             | 1.65E-3                                                        | 6.01E+1                                     |
| JD355      | 822102      | Research institutes for cultural and social science (public) **                             | 人文科学研究機関(国公立)★★                                          | 2.76E-3                                                                     | 0.00E+0                                               | 8.79E-4                                             | 1.88E-3                                                        | 9.28E+1                                     |
| JD356      | 822103      | Research institutes for natural sciences (private, non-profit) *                            | 自然科学研究機関(非営利)★                                           | 3.22E-3                                                                     | 0.00E+0                                               | 1.12E-3                                             | 2.10E-3                                                        | 8.18E+1                                     |
| JD357      | 822104      | Research institutes for cultural and social science (private, non-profit) *                 | 人文科学研究機関(非営利)★                                           | 1.70E-3                                                                     | 0.00E+0                                               | 6.76E-4                                             | 1.03E-3                                                        | 7.59E+1                                     |
| JD358      | 822105      | Research institutes for natural sciences (profit-making)                                    | 自然科学研究機関(産業)                                             | 5.96E-3                                                                     | 0.00E+0                                               | 2.54E-3                                             | 3.42E-3                                                        | 7.66E+1                                     |
| JD359      | 822106      | Research institutes for cultural and social science (profit-making)                         | 人文科学研究機関(産業)                                             | 1.49E-3                                                                     | 0.00E+0                                               | 6.09E-4                                             | 8.78E-4                                                        | 7.44E+1                                     |
| JD360      | 822201      | Research and development (intra-enterprise)                                                 | 企業内研究開発                                                  | 2.97E-3                                                                     | 0.00E+0                                               | 1.51E-3                                             | 1.45E-3                                                        | 6.15E+1                                     |
| JD361      | 831101      | Medical service (public)                                                                    | 医療(国公立)                                                  | 1.45E-2                                                                     | 0.00E+0                                               | 1.46E-3                                             | 1.30E-2                                                        | 1.20E+2                                     |
| JD362      | 831102      | Medical service (non-profit foundations, etc.)                                              | 医療(公益法人等)                                                | 8.14E-3                                                                     | 0.00E+0                                               | 1.15E-3                                             | 6.98E-3                                                        | 1.13E+2                                     |
| JD363      | 831103      | Medical service (medical corporations, etc.)                                                | 医療(医療法人等)                                                | 1.21E-2                                                                     | 0.00E+0                                               | 1.27E-3                                             | 1.08E-2                                                        | 1.20E+2                                     |
| JD364      | 831201      | Health and hygiene (public) **                                                              | 保健衛生(国公立)★★                                              | 1.59E-3                                                                     | 0.00E+0                                               | 7.92E-4                                             | 8.01E-4                                                        | 6.44E+1                                     |
| JD365      | 831202      | Health and hygiene (profit-making)                                                          | 保健衛生(産業)                                                 | 2.73E-3                                                                     | 0.00E+0                                               | 1.49E-3                                             | 1.24E-3                                                        | 5.54E+1                                     |
| JD366      | 831301      | Social insurance (public) **                                                                | 社会保険事業(国公立)★★                                            | 1.97E-3                                                                     | 0.00E+0                                               | 1.16E-3                                             | 8.15E-4                                                        | 5.13E+1                                     |
| JD367      | 831302      | Social insurance (private, non-profit) *                                                    | 社会保険事業(非営利)★                                             | 2.15E-3                                                                     | 0.00E+0                                               | 1.29E-3                                             | 8.54E-4                                                        | 4.97E+1                                     |
| JD368      | 831303      | Social welfare (public) **                                                                  | 社会福祉(国公立)★★                                              | 1.67E-3                                                                     | 0.00E+0                                               | 9.43E-4                                             | 7.29E-4                                                        | 5.48E+1                                     |
| JD369      | 831304      | Social welfare (private, non-profit) *                                                      | 社会福祉(非営利)★                                               | 1.57E-3                                                                     | 0.00E+0                                               | 8.82E-4                                             | 6.87E-4                                                        | 5.50E+1                                     |
| JD370      | 831305      | Social welfare (profit-making)                                                              | 社会福祉(産業)                                                 | 1.67E-3                                                                     | 0.00E+0                                               | 9.09E-4                                             | 7.63E-4                                                        | 5.87E+1                                     |
| JD371      | 831401      | Nursing care (In-home)                                                                      | 介護(居宅)                                                   | 2.77E-3                                                                     | 0.00E+0                                               | 8.13E-4                                             | 1.96E-3                                                        | 8.72E+1                                     |
| JD372      | 831402      | Nursing care (In-facility)                                                                  | 介護(施設)                                                   | 3.53E-3                                                                     | 0.00E+0                                               | 9.02E-4                                             | 2.62E-3                                                        | 9.29E+1                                     |
| JD373      | 841101      | Private non-profit institutions serving enterprises                                         | 対企業民間非営利団体                                               | 2.10E-3                                                                     | 0.00E+0                                               | 9.69E-4                                             | 1.13E-3                                                        | 6.94E+1                                     |
| JD374      | 841102      | Private non-profit institutions serving households, n.e.c. *                                | 対家計民間非営利団体(除別掲)★                                         | 1.50E-3                                                                     | 0.00E+0                                               | 6.93E-4                                             | 8.03E-4                                                        | 6.76E+1                                     |
| JD375      | 851101      | Advertising services                                                                        | 広告                                                       | 1.96E-3                                                                     | 0.00E+0                                               | 7.40E-4                                             | 1.22E-3                                                        | 8.11E+1                                     |
| JD376      | 851201      | Goods rental and leasing (except car rental)                                                | 物品賃貸業(除貸自動車)                                             | 4.33E-3                                                                     | 0.00E+0                                               | 1.87E-3                                             | 2.46E-3                                                        | 7.15E+1                                     |
| JD377      | 851301      | Car rental and leasing                                                                      | 貸自動車業                                                    | 1.47E-3                                                                     | 0.00E+0                                               | 7.66E-4                                             | 7.09E-4                                                        | 6.42E+1                                     |
| JD378      | 851410      | Repair of motor vehicles                                                                    | 自動車修理                                                    | 1.08E-2                                                                     | 0.00E+0                                               | 8.59E-3                                             | 2.24E-3                                                        | 2.48E+1                                     |
| JD379      | 851510      | Repair of machine                                                                           | 機械修理                                                     | 3.17E-2                                                                     | 0.00E+0                                               | 1.42E-2                                             | 1.75E-2                                                        | 7.22E+1                                     |
| JD380      | 851901      | Building maintenance services                                                               | 建物サービス                                                   | 9.85E-4                                                                     | 0.00E+0                                               | 3.79E-4                                             | 6.06E-4                                                        | 7.72E+1                                     |
| JD381      | 851902      | Judicial, financial and accounting services                                                 | 法務・財務・会計サービス                                             | 7.85E-4                                                                     | 0.00E+0                                               | 3.04E-4                                             | 4.81E-4                                                        | 7.73E+1                                     |
| JD382      | 851903      | Civil engineering and construction services                                                 | 土木建築サービス                                                 | 1.19E-3                                                                     | 0.00E+0                                               | 5.02E-4                                             | 6.87E-4                                                        | 7.31E+1                                     |
| JD383      | 851904      | Worker dispatching services                                                                 | 労働者派遣サービス                                                | 1.80E-4                                                                     | 0.00E+0                                               | 7.74E-5                                             | 1.02E-4                                                        | 7.02E+1                                     |
| JD384      | 851909      | Other business services                                                                     | その他の対事業所サービス                                             | 1.12E-3                                                                     | 0.00E+0                                               | 4.99E-4                                             | 6.20E-4                                                        | 6.69E+1                                     |
| JD385      | 861101      | Movie theaters                                                                              | 映画館                                                      | 4.41E-3                                                                     | 0.00E+0                                               | 1.59E-3                                             | 2.82E-3                                                        | 9.38E+1                                     |
| JD386      | 861102      | Performances (except otherwise classified), theatrical companies                            | 興行場(除別掲)・興行団                                             | 1.47E-3                                                                     | 0.00E+0                                               | 5.48E-4                                             | 9.20E-4                                                        | 8.24E+1                                     |
| JD387      | 861103      | Amusement and recreation facilities                                                         | 遊戯場                                                      | 3.45E-3                                                                     | 0.00E+0                                               | 1.89E-3                                             | 1.56E-3                                                        | 5.69E+1                                     |
| JD388      | 861104      | Stadiums and companies of bicycle, horse, motorcar and motorboat races                      | 競輪・競馬等の競走場・競技団                                           | 1.76E-3                                                                     | 0.00E+0                                               | 8.25E-4                                             | 9.35E-4                                                        | 6.78E+1                                     |
| JD389      | 861105      | Sport facility service, public gardens and amusement parks                                  | スポーツ施設提供業・公園・遊園地                                         | 1.94E-3                                                                     | 0.00E+0                                               | 8.44E-4                                             | 1.09E-3                                                        | 7.14E+1                                     |
| JD390      | 861109      | Other amusement and recreation services                                                     | その他の娯楽                                                   | 2.31E-3                                                                     | 0.00E+0                                               | 1.04E-3                                             | 1.27E-3                                                        | 7.26E+1                                     |
| JD391      | 861201      | General eating and drinking places (except coffee shops)                                    | 一般飲食店(除喫茶店)                                              | 2.50E-3                                                                     | 0.00E+0                                               | 1.28E-3                                             | 1.22E-3                                                        | 5.85E+1                                     |
| JD392      | 861202      | Coffee shops                                                                                | 喫茶店                                                      | 2.89E-3                                                                     | 0.00E+0                                               | 1.73E-3                                             | 1.16E-3                                                        | 5.05E+1                                     |
| JD393      | 861203      | Eating and drinking places for pleasures                                                    | 遊興飲食店                                                    | 2.04E-3                                                                     | 0.00E+0                                               | 1.05E-3                                             | 9.88E-4                                                        | 6.08E+1                                     |
| JD394      | 861301      | Hotels                                                                                      | 宿泊業                                                      | 2.92E-3                                                                     | 0.00E+0                                               | 1.77E-3                                             | 1.16E-3                                                        | 5.16E+1                                     |
| JD395      | 861401      | Cleaning                                                                                    | 洗濯業                                                      | 2.08E-3                                                                     | 0.00E+0                                               | 8.79E-4                                             | 1.20E-3                                                        | 7.75E+1                                     |
| JD396      | 861402      | Barber shops                                                                                | 理容業                                                      | 1.64E-3                                                                     | 0.00E+0                                               | 9.15E-4                                             | 7.23E-4                                                        | 6.07E+1                                     |
| JD397      | 861403      | Beauty shops                                                                                | 美容業                                                      | 2.29E-3                                                                     | 0.00E+0                                               | 1.61E-3                                             | 6.84E-4                                                        | 3.81E+1                                     |
| JD398      | 861404      | Public baths                                                                                | 浴場業                                                      | 3.57E-3                                                                     | 0.00E+0                                               | 1.63E-3                                             | 1.94E-3                                                        | 7.96E+1                                     |
| JD399      | 861409      | Other cleaning, barber shops, beauty shops and public baths                                 | その他の洗濯・理容・美容・浴場業                                         | 2.80E-3                                                                     | 0.00E+0                                               | 1.79E-3                                             | 1.01E-3                                                        | 4.65E+1                                     |
| JD400      | 861901      | Photographic studios                                                                        | 写真業                                                      | 1.70E-3                                                                     | 0.00E+0                                               | 6.78E-4                                             | 1.02E-3                                                        | 7.67E+1                                     |
| JD401      | 861902      | Ceremonial occasions                                                                        | 冠婚葬祭業                                                    | 2.58E-3                                                                     | 0.00E+0                                               | 1.29E-3                                             | 1.30E-3                                                        | 7.08E+1                                     |
| JD402      | 861903      | Miscellaneous repairs, n.e.c.                                                               | 各種修理業(除別掲)                                               | 4.78E-3                                                                     | 0.00E+0                                               | 3.56E-3                                             | 1.22E-3                                                        | 3.35E+1                                     |
| JD403      | 861904      | Supplementary tutorial schools, instruction services for arts, culture and technical skills | 個人教授業                                                    | 1.64E-3                                                                     | 0.00E+0                                               | 1.02E-3                                             | 6.23E-4                                                        | 5.01E+1                                     |
| JD404      | 861909      | Other personal services                                                                     | その他の対個人サービス                                              | 1.43E-3                                                                     | 0.00E+0                                               | 6.50E-4                                             | 7.84E-4                                                        | 7.39E+1                                     |
| JD405      | 890000      | Office supplies                                                                             | 事務用品                                                     | 9.57E-3                                                                     | 0.00E+0                                               | 3.93E-3                                             | 5.63E-3                                                        | 7.44E+1                                     |
| JD406      | 900000      | Activities not elsewhere classified                                                         | 分類不明                                                     | 5.87E-3                                                                     | 0.00E+0                                               | 3.16E-3                                             | 2.70E-3                                                        | 5.61E+1                                     |

Table A9: Embodied global NOx intensities of Japanese goods and services based on producer price in 2005 [1/5]

| Sector no. | Sector code | Sector name<br>[Japanese domestic commodity]                                 | Sector name in Japanese<br>[Japanese domestic commodity] | Embodied global NO <sub>x</sub> intensities based on producer price in 2005 |                                                       |                                                     |                                                                |                                             |
|------------|-------------|------------------------------------------------------------------------------|----------------------------------------------------------|-----------------------------------------------------------------------------|-------------------------------------------------------|-----------------------------------------------------|----------------------------------------------------------------|---------------------------------------------|
|            |             |                                                                              |                                                          | Total                                                                       | (D) Direct emissions<br>in Japan during<br>production | (S) Induced<br>emissions in Japan<br>through supply | (F) Induced emissions<br>in foreign country's<br>supply chains | Coefficient of variance<br>of the intensity |
|            |             |                                                                              |                                                          | kg/M-JPY                                                                    | kg/M-JPY                                              | kg/M-JPY                                            | kg/M-JPY                                                       | %                                           |
| JD1        | 011101      | Rice                                                                         | 米                                                        | 5.69E+0                                                                     | 1.57E+0                                               | 1.98E+0                                             | 2.14E+0                                                        | 3.52E+0                                     |
| JD2        | 011102      | Wheat, barley and the like                                                   | 麦類                                                       | 7.01E+0                                                                     | 1.12E+0                                               | 2.75E+0                                             | 3.14E+0                                                        | 4.13E+0                                     |
| JD3        | 011201      | Potatoes and sweet potatoes                                                  | いも類                                                      | 4.47E+0                                                                     | 2.88E-1                                               | 1.97E+0                                             | 2.22E+0                                                        | 4.65E+0                                     |
| JD4        | 011202      | Pulses                                                                       | 豆類                                                       | 4.67E+0                                                                     | 2.57E-1                                               | 2.12E+0                                             | 2.30E+0                                                        | 4.66E+0                                     |
| JD5        | 011301      | Vegetables                                                                   | 野菜                                                       | 5.44E+0                                                                     | 1.21E+0                                               | 1.93E+0                                             | 2.30E+0                                                        | 4.40E+0                                     |
| JD6        | 011401      | Fruits                                                                       | 果実                                                       | 4.79E+0                                                                     | 1.04E+0                                               | 1.71E+0                                             | 2.03E+0                                                        | 4.10E+0                                     |
| JD7        | 011501      | Sugar crops                                                                  | 砂糖原料作物                                                   | 6.42E+0                                                                     | 8.57E-1                                               | 2.42E+0                                             | 3.15E+0                                                        | 4.55E+0                                     |
| JD8        | 011502      | Crops for beverages                                                          | 飲料用作物                                                    | 5.86E+0                                                                     | 1.59E-2                                               | 2.82E+0                                             | 3.03E+0                                                        | 4.75E+0                                     |
| JD9        | 011509      | Other edible crops                                                           | その他の食用耕種作物                                               | 5.12E+0                                                                     | 4.94E-1                                               | 2.14E+0                                             | 2.48E+0                                                        | 4.50E+0                                     |
| JD10       | 011601      | Crops for feed and forage                                                    | 飼料作物                                                     | 5.58E+0                                                                     | 3.99E-1                                               | 1.59E+0                                             | 3.59E+0                                                        | 7.71E+0                                     |
| JD11       | 011602      | Seeds and seedlings                                                          | 種苗                                                       | 7.38E+0                                                                     | 1.39E-1                                               | 1.44E+0                                             | 5.80E+0                                                        | 2.04E+1                                     |
| JD12       | 011603      | Flowers and plants                                                           | 花き・花木類                                                   | 1.55E+1                                                                     | 9.92E+0                                               | 2.44E+0                                             | 3.19E+0                                                        | 2.71E+0                                     |
| JD13       | 011609      | Other inedible crops                                                         | その他の非食用耕種作物                                              | 4.17E+0                                                                     | 1.56E+0                                               | 1.20E+0                                             | 1.42E+0                                                        | 3.22E+0                                     |
| JD14       | 012101      | Dairy cattle farming                                                         | 酪農                                                       | 9.11E+0                                                                     | 1.05E+0                                               | 1.79E+0                                             | 6.28E+0                                                        | 1.12E+1                                     |
| JD15       | 012102      | Hen eggs                                                                     | 鶏卵                                                       | 1.16E+1                                                                     | 1.88E-1                                               | 2.42E+0                                             | 9.04E+0                                                        | 1.22E+1                                     |
| JD16       | 012103      | Fowls and broilers                                                           | 肉鶏                                                       | 1.33E+1                                                                     | 4.57E-1                                               | 2.98E+0                                             | 9.85E+0                                                        | 1.15E+1                                     |
| JD17       | 012104      | Hogs                                                                         | 豚                                                        | 1.14E+1                                                                     | 3.16E-1                                               | 2.59E+0                                             | 8.52E+0                                                        | 1.17E+1                                     |
| JD18       | 012105      | Beef cattle                                                                  | 肉用牛                                                      | 1.05E+1                                                                     | 4.86E-2                                               | 2.68E+0                                             | 7.74E+0                                                        | 1.17E+1                                     |
| JD19       | 012109      | Other livestock                                                              | その他の畜産                                                   | 9.70E+0                                                                     | 4.41E-1                                               | 2.04E+0                                             | 7.22E+0                                                        | 1.04E+1                                     |
| JD20       | 013101      | Veterinary service                                                           | 獣医学                                                      | 2.62E+0                                                                     | 0.00E+0                                               | 9.73E-1                                             | 1.64E+0                                                        | 7.67E+0                                     |
| JD21       | 013102      | Agricultural services (except veterinary service)                            | 農業サービス(除獣医学)                                             | 5.02E+0                                                                     | 4.63E-1                                               | 2.38E+0                                             | 2.18E+0                                                        | 4.50E+0                                     |
| JD22       | 021101      | Silviculture                                                                 | 育林                                                       | 7.51E-1                                                                     | 1.85E-1                                               | 2.37E-1                                             | 3.29E-1                                                        | 5.24E+0                                     |
| JD23       | 021201      | Logs                                                                         | 素材                                                       | 3.55E+0                                                                     | 1.24E+0                                               | 1.06E+0                                             | 1.24E+0                                                        | 4.35E+0                                     |
| JD24       | 021301      | Special forest products (inc. hunting)                                       | 特用林産物(含狩猟業)                                              | 1.76E+1                                                                     | 1.18E+1                                               | 3.00E+0                                             | 2.83E+0                                                        | 1.88E+0                                     |
| JD25       | 031101      | Marine fisheries                                                             | 海面漁業                                                     | 9.58E+1                                                                     | 9.05E+1                                               | 2.39E+0                                             | 2.93E+0                                                        | 4.49E-1                                     |
| JD26       | 031104      | Marine culture                                                               | 海面養殖業                                                    | 3.59E+1                                                                     | 2.02E+1                                               | 1.15E+1                                             | 4.20E+0                                                        | 1.07E+0                                     |
| JD27       | 0312001     | Inland water fisheries and culture                                           | 内水面漁業・養殖業                                                | 3.13E+1                                                                     | 2.18E+1                                               | 5.05E+0                                             | 4.53E+0                                                        | 1.59E+0                                     |
| JD28       | 061101      | Metallic ores                                                                | 金属鉱物                                                     | 1.14E+1                                                                     | 1.21E+0                                               | 7.85E+0                                             | 2.39E+0                                                        | 2.45E+0                                     |
| JD29       | 062101      | Materials for ceramics                                                       | 窯業原料鉱物                                                   | 1.12E+1                                                                     | 4.07E+0                                               | 4.36E+0                                             | 2.80E+0                                                        | 3.49E+0                                     |
| JD30       | 062201      | Gravel and quarrying                                                         | 砂利・採石                                                    | 8.58E+0                                                                     | 1.34E+0                                               | 4.35E+0                                             | 2.89E+0                                                        | 5.09E+0                                     |
| JD31       | 062202      | Crushed stones                                                               | 砕石                                                       | 8.29E+0                                                                     | 1.18E+0                                               | 4.22E+0                                             | 2.89E+0                                                        | 4.86E+0                                     |
| JD32       | 062909      | Other non-metallic ores                                                      | その他の非金属鉱物                                                | 2.80E+1                                                                     | 1.94E+1                                               | 4.86E+0                                             | 3.76E+0                                                        | 1.87E+0                                     |
| JD33       | 071101      | Coal mining, crude petroleum and natural gas                                 | 石炭・原油・天然ガス                                               | 6.73E+0                                                                     | 1.81E-1                                               | 5.04E+0                                             | 1.51E+0                                                        | 2.49E+0                                     |
| JD34       | 0711011     | Coal mining                                                                  | 石炭                                                       | 6.73E+0                                                                     | 0.00E+0                                               | 5.22E+0                                             | 1.51E+0                                                        | 2.49E+0                                     |
| JD35       | 0711012     | Crude petroleum                                                              | 原油                                                       | 6.73E+0                                                                     | 0.00E+0                                               | 5.22E+0                                             | 1.51E+0                                                        | 2.49E+0                                     |
| JD36       | 0711013     | Natural gas                                                                  | 天然ガス                                                     | 6.73E+0                                                                     | 0.00E+0                                               | 5.22E+0                                             | 1.51E+0                                                        | 2.49E+0                                     |
| JD37       | 111101      | Slaughtering and meat processing                                             | と畜(含肉鶏処理)                                                | 9.93E+0                                                                     | 5.71E-4                                               | 2.67E+0                                             | 7.26E+0                                                        | 1.13E+1                                     |
| JD38       | 111201      | Processed meat products                                                      | 肉加工品                                                     | 1.27E+1                                                                     | 2.91E-1                                               | 1.37E+0                                             | 1.11E+1                                                        | 1.18E+1                                     |
| JD39       | 111202      | Bottled or canned meat products                                              | 畜産びん・かん詰                                                 | 6.90E+0                                                                     | 5.14E-1                                               | 1.86E+0                                             | 4.53E+0                                                        | 7.22E+0                                     |
| JD40       | 111203      | Dairy farm products                                                          | 酪農品                                                      | 7.96E+0                                                                     | 7.12E-1                                               | 2.81E+0                                             | 4.44E+0                                                        | 7.11E+0                                     |
| JD41       | 111301      | Frozen fish and shellfish                                                    | 冷凍魚介類                                                    | 4.56E+1                                                                     | 3.54E-1                                               | 4.27E+1                                             | 2.58E+0                                                        | 6.15E-1                                     |
| JD42       | 111302      | Salted, dried or smoked seafood                                              | 塩・干・くん製品                                                 | 2.81E+1                                                                     | 5.61E-1                                               | 1.93E+1                                             | 8.25E+0                                                        | 2.82E+0                                     |
| JD43       | 111303      | Bottled or canned seafood                                                    | 水産びん・かん詰                                                 | 1.94E+1                                                                     | 1.10E+0                                               | 1.33E+1                                             | 5.02E+0                                                        | 2.31E+0                                     |
| JD44       | 111304      | Fish paste                                                                   | ねり製品                                                     | 1.42E+1                                                                     | 4.58E-1                                               | 6.70E+0                                             | 7.01E+0                                                        | 4.56E+0                                     |
| JD45       | 111309      | Other processed seafood                                                      | その他の水産食品                                                 | 1.87E+1                                                                     | 2.69E-1                                               | 1.34E+1                                             | 5.12E+0                                                        | 2.50E+0                                     |
| JD46       | 111401      | Grain milling                                                                | 精穀                                                       | 5.18E+0                                                                     | 7.85E-2                                               | 3.15E+0                                             | 1.95E+0                                                        | 3.84E+0                                     |
| JD47       | 111402      | Flour and other grain milled products                                        | 製粉                                                       | 1.56E+1                                                                     | 8.86E-1                                               | 2.21E+0                                             | 1.25E+1                                                        | 1.63E+1                                     |
| JD48       | 111501      | Noodles                                                                      | めん類                                                      | 8.89E+0                                                                     | 9.58E-1                                               | 2.39E+0                                             | 5.55E+0                                                        | 8.10E+0                                     |
| JD49       | 111502      | Bread                                                                        | パン類                                                      | 6.84E+0                                                                     | 1.57E-1                                               | 1.98E+0                                             | 4.71E+0                                                        | 8.64E+0                                     |
| JD50       | 111503      | Confectionery                                                                | 菓子類                                                      | 7.45E+0                                                                     | 4.76E-1                                               | 2.00E+0                                             | 4.97E+0                                                        | 7.19E+0                                     |
| JD51       | 111601      | Bottled or canned vegetables and fruits                                      | 農産びん・かん詰                                                 | 9.48E+0                                                                     | 8.56E-1                                               | 2.73E+0                                             | 5.89E+0                                                        | 5.69E+0                                     |
| JD52       | 111602      | Preserved agricultural foodstuffs (other than bottled or canned)             | 農産保存食料品(除びん・かん詰)                                         | 6.80E+0                                                                     | 2.95E-1                                               | 2.07E+0                                             | 4.43E+0                                                        | 6.26E+0                                     |
| JD53       | 111701      | Sugar                                                                        | 砂糖                                                       | 1.32E+1                                                                     | 2.11E+0                                               | 3.26E+0                                             | 7.84E+0                                                        | 1.10E+1                                     |
| JD54       | 111702      | Starch                                                                       | でん粉                                                      | 1.78E+1                                                                     | 1.56E+0                                               | 2.10E+0                                             | 1.41E+1                                                        | 1.66E+1                                     |
| JD55       | 111703      | Dextrose, syrup and isomerized sugar                                         | ぶどう糖・水あめ・異性化糖                                            | 1.59E+1                                                                     | 1.84E+0                                               | 5.37E+0                                             | 8.74E+0                                                        | 9.39E+0                                     |
| JD56       | 111704      | Vegetable oils and meal                                                      | 植物油脂                                                     | 2.07E+1                                                                     | 6.49E-1                                               | 1.90E+0                                             | 1.82E+1                                                        | 1.59E+1                                     |
| JD57       | 111705      | Animal oils and fats                                                         | 動物油脂                                                     | 1.39E+1                                                                     | 2.90E+0                                               | 5.39E+0                                             | 5.58E+0                                                        | 5.12E+0                                     |
| JD58       | 111706      | Condiments and seasonings                                                    | 調味料                                                      | 7.97E+0                                                                     | 4.69E-1                                               | 2.54E+0                                             | 4.96E+0                                                        | 6.47E+0                                     |
| JD59       | 111901      | Prepared frozen foods                                                        | 冷凍調理食品                                                   | 9.57E+0                                                                     | 6.85E-1                                               | 2.86E+0                                             | 6.03E+0                                                        | 5.97E+0                                     |
| JD60       | 111902      | Retort foods                                                                 | レトルト食品                                                   | 9.57E+0                                                                     | 9.30E-1                                               | 2.34E+0                                             | 6.30E+0                                                        | 5.96E+0                                     |
| JD61       | 111903      | Dishes, sushi and lunch boxes                                                | そう菜・すし・弁当                                                | 8.63E+0                                                                     | 2.79E-1                                               | 2.91E+0                                             | 5.44E+0                                                        | 5.93E+0                                     |
| JD62       | 111904      | School lunch (public) **                                                     | 学校給食(国公立)★★                                              | 5.69E+0                                                                     | 3.54E-2                                               | 2.49E+0                                             | 3.17E+0                                                        | 5.74E+0                                     |
| JD63       | 111905      | School lunch (private) *                                                     | 学校給食(私立)★                                                | 6.07E+0                                                                     | 0.00E+0                                               | 2.63E+0                                             | 3.45E+0                                                        | 5.80E+0                                     |
| JD64       | 111909      | Other foods                                                                  | その他の食料品                                                  | 1.03E+1                                                                     | 1.04E+0                                               | 2.39E+0                                             | 6.85E+0                                                        | 8.48E+0                                     |
| JD65       | 112101      | Refined sake                                                                 | 清酒                                                       | 3.63E+0                                                                     | 2.27E-1                                               | 2.04E+0                                             | 1.36E+0                                                        | 3.91E+0                                     |
| JD66       | 112102      | Beer                                                                         | ビール                                                      | 2.92E+0                                                                     | 1.33E-1                                               | 1.22E+0                                             | 1.56E+0                                                        | 4.98E+0                                     |
| JD67       | 112103      | Whiskey and brandy                                                           | ウイスキー類                                                   | 3.53E+0                                                                     | 4.28E-1                                               | 1.47E+0                                             | 1.62E+0                                                        | 5.06E+0                                     |
| JD68       | 112109      | Other liquors                                                                | その他の酒類                                                   | 4.36E+0                                                                     | 4.92E-1                                               | 1.61E+0                                             | 2.26E+0                                                        | 5.33E+0                                     |
| JD69       | 112901      | Tea and roasted coffee                                                       | 茶・コーヒー                                                   | 1.14E+1                                                                     | 4.37E-1                                               | 2.06E+0                                             | 8.90E+0                                                        | 4.49E+0                                     |
| JD70       | 112902      | Soft drinks                                                                  | 清涼飲料                                                     | 6.02E+0                                                                     | 3.92E-1                                               | 1.99E+0                                             | 3.63E+0                                                        | 4.92E+0                                     |
| JD71       | 112903      | Manufactured ice                                                             | 製氷                                                       | 6.78E+0                                                                     | 2.01E-2                                               | 5.13E+0                                             | 1.63E+0                                                        | 2.37E+0                                     |
| JD72       | 113101      | Animal feed                                                                  | 飼料                                                       | 1.84E+1                                                                     | 4.48E-1                                               | 1.77E+0                                             | 1.62E+1                                                        | 1.45E+1                                     |
| JD73       | 113102      | Organic fertilizers, n.e.c.                                                  | 有機質肥料(除別掲)                                               | 9.70E+0                                                                     | 4.54E-1                                               | 2.22E+0                                             | 7.03E+0                                                        | 8.71E+0                                     |
| JD74       | 114101      | Tobacco                                                                      | たばこ                                                      | 2.33E+0                                                                     | 7.07E-2                                               | 5.96E-1                                             | 1.67E+0                                                        | 1.38E+1                                     |
| JD75       | 151101      | Fiber yarns                                                                  | 紡績糸                                                      | 2.34E+1                                                                     | 6.42E-1                                               | 3.50E+0                                             | 1.92E+1                                                        | 1.50E+1                                     |
| JD76       | 151201      | Cotton and staple fiber fabrics (inc. fabrics of synthetic spun fibers)      | 綿・スフ織物(含合繊短繊維織物)                                         | 1.93E+1                                                                     | 8.05E-1                                               | 4.82E+0                                             | 1.37E+1                                                        | 5.77E+0                                     |
| JD77       | 151202      | Silk and artificial silk fabrics (inc. fabrics of synthetic filament fibers) | 絹・人絹織物(含合繊長繊維織物)                                         | 1.33E+1                                                                     | 1.05E+0                                               | 5.99E+0                                             | 6.21E+0                                                        | 4.39E+0                                     |
| JD78       | 151203      | Woolen fabrics, hemp fabrics and other fabrics                               | 毛織物・麻織物・その他の織物                                           | 1.48E+1                                                                     | 1.17E-1                                               | 5.13E+0                                             | 9.52E+0                                                        | 5.64E+0                                     |
| JD79       | 151301      | Knitting fabrics                                                             | ニット生地                                                    | 1.48E+1                                                                     | 7.97E-2                                               | 3.50E+0                                             | 1.13E+1                                                        | 7.29E+0                                     |
| JD80       | 151401      | Yarn and fabric dyeing and finishing (processing on commission only)         | 染色整理                                                     | 1.46E+1                                                                     | 4.59E+0                                               | 3.60E+0                                             | 6.40E+0                                                        | 3.92E+0                                     |
| JD81       | 151901      | Ropes and nets                                                               | 綱・網                                                      | 1.04E+1                                                                     | 3.60E-1                                               | 5.42E+0                                             | 4.59E+0                                                        | 4.74E+0                                     |
| JD82       | 151902      | Carpets and floor mats                                                       | じゅうたん・床敷物                                                | 1.30E+1                                                                     | 5.40E-1                                               | 4.98E+0                                             | 7.45E+0                                                        | 5.43E+0                                     |
| JD83       | 151903      | Fabricated textiles for medical use                                          | 繊維製衛生材料                                                  | 1.23E+1                                                                     | 5.98E-1                                               | 4.04E+0                                             | 7.61E+0                                                        | 1.16E+1                                     |
| JD84       | 151909      | Other fabricated textile products                                            | その他の繊維工業製品                                               | 1.10E+1                                                                     | 5.32E-1                                               | 4.33E+0                                             | 6.15E+0                                                        | 5.56E+0                                     |
| JD85       | 152101      | Woven fabric apparel                                                         | 織物製衣服                                                    | 1.01E+1                                                                     | 2.70E-1                                               | 2.49E+0                                             | 7.37E+0                                                        | 6.74E+0                                     |
| JD86       | 152102      | Knitted apparel                                                              | ニット製衣服                                                   | 9.85E+0                                                                     | 3.96E-1                                               | 3.98E+0                                             | 5.47E+0                                                        | 5.52E+0                                     |
| JD87       | 152209      | Other wearing apparel and clothing accessories                               | その他の衣服・身の回り品                                             | 1.04E+1                                                                     | 8.82E-1                                               | 3.18E+0                                             | 6.29E+0                                                        | 5.14E+0                                     |
| JD88       | 152901      | Bedding                                                                      | 寝具                                                       | 9.21E+0                                                                     | 1.19E-1                                               | 2.04E+0                                             | 7.05E+0                                                        | 6.87E+0                                     |
| JD89       | 152909      | Other ready-made textile products                                            | その他の繊維既製品                                                | 9.83E+0                                                                     | 2.56E-1                                               | 2.82E+0                                             | 6.76E+0                                                        | 6.17E+0                                     |
| JD90       | 161101      | Timber                                                                       | 製材                                                       | 9.68E+0                                                                     | 4.74E-1                                               | 1.48E+0                                             | 7.72E+0                                                        | 7.38E+0                                     |
| JD91       | 161102      | Plywood                                                                      | 合板                                                       | 1.03E+1                                                                     | 6.01E-1                                               | 2.48E+0                                             | 7.19E+0                                                        | 6.68E+0                                     |
| JD92       | 161103      | Wooden chips                                                                 | 木材チップ                                                    | 4.74E+0                                                                     | 2.83E-1                                               | 2.24E+0                                             | 2.21E+0                                                        | 4.37E+0                                     |
| JD93       | 161909      | Other wooden products                                                        | その他の木製品                                                  | 6.34E+0                                                                     | 2.10E-1                                               | 2.04E+0                                             | 4.09E+0                                                        | 6.43E+0                                     |

Table A9: Embodied global NOx intensities of Japanese goods and services based on producer price in 2005 [2/5]

| Sector no. | Sector code | Sector name<br>[Japanese domestic commodity]                | Sector name in Japanese<br>[Japanese domestic commodity] | Embodied global NO <sub>x</sub> intensities based on producer price in 2005 |                                                       |                                                     |                                                                |                                             |
|------------|-------------|-------------------------------------------------------------|----------------------------------------------------------|-----------------------------------------------------------------------------|-------------------------------------------------------|-----------------------------------------------------|----------------------------------------------------------------|---------------------------------------------|
|            |             |                                                             |                                                          | Total                                                                       | (D) Direct emissions<br>in Japan during<br>production | (S) Induced<br>emissions in Japan<br>through supply | (F) Induced emissions<br>in foreign country's<br>supply chains | Coefficient of variance<br>of the intensity |
|            |             |                                                             |                                                          | kg/M-JPY                                                                    | kg/M-JPY                                              | kg/M-JPY                                            | kg/M-JPY                                                       | %                                           |
| JD94       | 171101      | Wooden furniture and fixtures                               | 木製家具・装備品                                                 | 8.46E+0                                                                     | 4.65E-1                                               | 2.33E+0                                             | 5.67E+0                                                        | 6.18E+0                                     |
| JD95       | 171102      | Wooden fixtures                                             | 木製建具                                                     | 7.28E+0                                                                     | 4.13E-1                                               | 2.91E+0                                             | 3.96E+0                                                        | 5.21E+0                                     |
| JD96       | 171103      | Metallic furniture and fixture                              | 金属製家具・装備品                                                | 8.75E+0                                                                     | 4.28E-1                                               | 3.83E+0                                             | 4.50E+0                                                        | 4.62E+0                                     |
| JD97       | 181101      | Pulp                                                        | パルプ                                                      | 4.62E+1                                                                     | 2.42E+1                                               | 8.63E+0                                             | 1.33E+1                                                        | 3.92E+0                                     |
| JD98       | 181201      | Paper                                                       | 洋紙・和紙                                                    | 4.19E+1                                                                     | 1.95E+1                                               | 1.60E+1                                             | 6.42E+0                                                        | 1.62E+0                                     |
| JD99       | 181202      | Paperboard                                                  | 板紙                                                       | 3.04E+1                                                                     | 7.88E+0                                               | 1.62E+1                                             | 6.28E+0                                                        | 2.23E+0                                     |
| JD100      | 181301      | Corrugated cardboard                                        | 段ボール                                                     | 1.65E+1                                                                     | 2.34E-1                                               | 1.23E+1                                             | 3.93E+0                                                        | 2.56E+0                                     |
| JD101      | 181302      | Coated paper and building<br>(construction) paper           | 塗工紙・建設用加工紙                                               | 1.32E+1                                                                     | 7.36E-1                                               | 9.12E+0                                             | 3.32E+0                                                        | 2.49E+0                                     |
| JD102      | 182101      | Corrugated card board boxes                                 | 段ボール箱                                                    | 7.67E+0                                                                     | 3.27E-1                                               | 5.35E+0                                             | 1.99E+0                                                        | 2.87E+0                                     |
| JD103      | 182109      | Other paper containers                                      | その他の紙製容器                                                 | 1.10E+1                                                                     | 2.91E-1                                               | 4.36E+0                                             | 4.36E+0                                                        | 5.21E+0                                     |
| JD104      | 182901      | Paper textile for medical use                               | 紙製衛生材料・用品                                                | 1.09E+1                                                                     | 6.62E-1                                               | 6.32E+0                                             | 3.88E+0                                                        | 3.37E+0                                     |
| JD105      | 182909      | Other pulp, paper and processed paper<br>products           | その他のパルプ・紙・紙加工品                                           | 1.06E+1                                                                     | 7.11E-1                                               | 7.03E+0                                             | 2.83E+0                                                        | 2.56E+0                                     |
| JD106      | 191101      | Printing, plate making and book binding                     | 印刷・製版・製本                                                 | 7.26E+0                                                                     | 5.43E-2                                               | 4.87E+0                                             | 2.33E+0                                                        | 3.02E+0                                     |
| JD107      | 201101      | Chemical fertilizer                                         | 化学肥料                                                     | 2.33E+1                                                                     | 7.31E+0                                               | 3.88E+0                                             | 1.22E+1                                                        | 4.64E+0                                     |
| JD108      | 202101      | Industrial soda chemicals                                   | ソーダ工業製品                                                  | 2.89E+1                                                                     | 3.24E+0                                               | 1.87E+1                                             | 6.96E+0                                                        | 4.54E+0                                     |
| JD109      | 202901      | Inorganic pigment                                           | 無機顔料                                                     | 1.75E+1                                                                     | 1.62E+0                                               | 6.65E+0                                             | 9.26E+0                                                        | 4.49E+0                                     |
| JD110      | 202902      | Compressed gas and liquefied gas                            | 圧縮ガス・液化ガス                                                | 1.55E+1                                                                     | 4.06E-1                                               | 1.13E+1                                             | 3.70E+0                                                        | 2.26E+0                                     |
| JD111      | 202903      | Salt                                                        | 塩                                                        | 2.78E+1                                                                     | 1.81E+1                                               | 3.73E+0                                             | 5.99E+0                                                        | 4.63E+0                                     |
| JD112      | 202909      | Other industrial inorganic chemicals                        | その他の無機化学工業製品                                             | 2.02E+1                                                                     | 3.89E+0                                               | 5.77E+0                                             | 1.05E+1                                                        | 4.47E+0                                     |
| JD113      | 203101      | Petrochemical basic products                                | 石油化学基礎製品                                                 | 1.89E+1                                                                     | 1.28E+0                                               | 3.30E+0                                             | 1.43E+1                                                        | 1.40E+1                                     |
| JD114      | 203102      | Petrochemical aromatic products<br>(except synthetic resin) | 石油化学系芳香族製品                                               | 1.71E+1                                                                     | 2.20E+0                                               | 2.78E+0                                             | 1.22E+1                                                        | 1.30E+1                                     |
| JD115      | 203201      | Aliphatic intermediates                                     | 脂肪族中間物                                                   | 2.14E+1                                                                     | 3.66E+0                                               | 7.77E+0                                             | 1.00E+1                                                        | 6.37E+0                                     |
| JD116      | 203202      | Cyclic intermediates                                        | 環式中間物                                                    | 1.76E+1                                                                     | 2.56E+0                                               | 4.41E+0                                             | 1.06E+1                                                        | 7.74E+0                                     |
| JD117      | 203301      | Synthetic rubber                                            | 合成ゴム                                                     | 2.36E+1                                                                     | 9.63E+0                                               | 7.50E+0                                             | 6.48E+0                                                        | 4.07E+0                                     |
| JD118      | 203901      | Methane derivatives                                         | メタン誘導品                                                   | 2.30E+1                                                                     | 9.56E+0                                               | 6.08E+0                                             | 7.41E+0                                                        | 2.78E+0                                     |
| JD119      | 203902      | Oil and fat industrial chemicals                            | 油脂加工製品                                                   | 1.34E+1                                                                     | 2.35E+0                                               | 2.77E+0                                             | 8.30E+0                                                        | 6.98E+0                                     |
| JD120      | 203903      | Plasticizers                                                | 可塑剤                                                      | 1.68E+1                                                                     | 2.72E+0                                               | 4.92E+0                                             | 9.19E+0                                                        | 5.18E+0                                     |
| JD121      | 203904      | Synthetic dyes                                              | 合成染料                                                     | 2.16E+1                                                                     | 8.00E+0                                               | 5.80E+0                                             | 7.82E+0                                                        | 3.84E+0                                     |
| JD122      | 203909      | Other industrial organic chemicals                          | その他の有機化学工業製品                                             | 1.42E+1                                                                     | 1.26E+0                                               | 6.31E+0                                             | 6.69E+0                                                        | 4.50E+0                                     |
| JD123      | 204101      | Thermo-setting resins                                       | 熱硬化性樹脂                                                   | 1.37E+1                                                                     | 7.78E-1                                               | 4.85E+0                                             | 8.05E+0                                                        | 5.99E+0                                     |
| JD124      | 204102      | Thermoplastics resins                                       | 熱可塑性樹脂                                                   | 1.50E+1                                                                     | 1.01E+0                                               | 4.89E+0                                             | 9.10E+0                                                        | 9.15E+0                                     |
| JD125      | 204103      | High function resins                                        | 高機能性樹脂                                                   | 1.35E+1                                                                     | 5.31E-1                                               | 5.32E+0                                             | 7.65E+0                                                        | 6.05E+0                                     |
| JD126      | 204109      | Other resins                                                | その他の合成樹脂                                                 | 1.35E+1                                                                     | 6.05E-1                                               | 5.10E+0                                             | 7.76E+0                                                        | 6.19E+0                                     |
| JD127      | 205101      | Rayon and acetate                                           | レーヨン・アセテート                                               | 1.77E+1                                                                     | 5.47E+0                                               | 5.95E+0                                             | 6.23E+0                                                        | 3.56E+0                                     |
| JD128      | 205102      | Synthetic fibers                                            | 合成繊維                                                     | 1.98E+1                                                                     | 7.16E+0                                               | 6.70E+0                                             | 5.96E+0                                                        | 3.26E+0                                     |
| JD129      | 206101      | Medicaments                                                 | 医薬品                                                      | 5.35E+0                                                                     | 2.67E-1                                               | 2.20E+0                                             | 2.89E+0                                                        | 5.54E+0                                     |
| JD130      | 207101      | Soap, synthetic detergents and surface<br>active agents     | 石けん・合成洗剤・界面活性剤                                           | 1.24E+1                                                                     | 3.03E+0                                               | 3.45E+0                                             | 5.92E+0                                                        | 4.65E+0                                     |
| JD131      | 207102      | Cosmetics, toilet preparations and<br>dentifrices           | 化粧品・歯磨                                                   | 6.88E+0                                                                     | 1.37E-1                                               | 3.45E+0                                             | 3.29E+0                                                        | 4.83E+0                                     |
| JD132      | 207201      | Paint and varnishes                                         | 塗料                                                       | 1.18E+1                                                                     | 5.20E-1                                               | 3.85E+0                                             | 7.43E+0                                                        | 6.15E+0                                     |
| JD133      | 207202      | Printing ink                                                | 印刷インキ                                                    | 1.07E+1                                                                     | 1.11E-1                                               | 3.60E+0                                             | 6.98E+0                                                        | 6.68E+0                                     |
| JD134      | 207301      | Photographic sensitive materials                            | 写真感光材料                                                   | 1.32E+1                                                                     | 1.95E+0                                               | 4.65E+0                                             | 6.62E+0                                                        | 4.46E+0                                     |
| JD135      | 207401      | Agricultural chemicals                                      | 農薬                                                       | 1.35E+1                                                                     | 3.71E+0                                               | 4.63E+0                                             | 5.15E+0                                                        | 3.57E+0                                     |
| JD136      | 207901      | Gelatin and adhesives                                       | ゼラチン・接着剤                                                 | 1.09E+1                                                                     | 1.67E+0                                               | 3.43E+0                                             | 5.80E+0                                                        | 5.28E+0                                     |
| JD137      | 207909      | Other final chemical products                               | その他の化学最終製品                                               | 1.40E+1                                                                     | 2.33E+0                                               | 4.46E+0                                             | 7.22E+0                                                        | 4.76E+0                                     |
| JD138      | 211101      | Petroleum refinery products (inc.<br>greases)               | 石油製品                                                     | 1.91E+1                                                                     | 2.87E+0                                               | 1.10E+0                                             | 1.51E+1                                                        | 1.76E+1                                     |
| JD139      | 212101      | Coal products                                               | 石炭製品                                                     | 2.10E+1                                                                     | 5.63E+0                                               | 1.46E+0                                             | 1.39E+1                                                        | 8.00E+0                                     |
| JD140      | 212102      | Paving materials                                            | 舗装材料                                                     | 8.02E+0                                                                     | 1.52E-1                                               | 2.97E+0                                             | 4.90E+0                                                        | 1.08E+1                                     |
| JD141      | 221101      | Plastic products                                            | プラスチック製品                                                 | 9.42E+0                                                                     | 1.30E-1                                               | 3.14E+0                                             | 6.15E+0                                                        | 6.56E+0                                     |
| JD142      | 231101      | Tires and inner tubes                                       | タイヤ・チューブ                                                 | 1.89E+1                                                                     | 3.81E-1                                               | 5.18E+0                                             | 1.33E+1                                                        | 1.32E+1                                     |
| JD143      | 231901      | Rubber footwear                                             | ゴム製履物                                                    | 8.45E+0                                                                     | 1.16E+0                                               | 2.17E+0                                             | 5.12E+0                                                        | 1.01E+1                                     |
| JD144      | 231902      | Plastic footwear                                            | プラスチック製履物                                                | 8.67E+0                                                                     | 1.15E+0                                               | 2.55E+0                                             | 4.97E+0                                                        | 5.63E+0                                     |
| JD145      | 231909      | Other rubber products                                       | その他のゴム製品                                                 | 9.38E+0                                                                     | 2.83E-1                                               | 3.43E+0                                             | 5.66E+0                                                        | 7.73E+0                                     |
| JD146      | 241101      | Leather footwear                                            | 革製履物                                                     | 9.29E+0                                                                     | 3.34E-1                                               | 1.43E+0                                             | 7.53E+0                                                        | 6.84E+0                                     |
| JD147      | 241201      | Leather and fur skins                                       | 皮革・毛皮                                                    | 1.25E+1                                                                     | 8.75E-1                                               | 1.47E+0                                             | 1.01E+1                                                        | 9.84E+0                                     |
| JD148      | 241202      | Miscellaneous leather products                              | かばん・袋物・その他の革製品                                           | 7.14E+0                                                                     | 1.40E-1                                               | 1.84E+0                                             | 5.17E+0                                                        | 5.93E+0                                     |
| JD149      | 251101      | Sheet glass and safety glass                                | 板ガラス・安全ガラス                                               | 2.18E+1                                                                     | 1.43E+1                                               | 3.45E+0                                             | 4.08E+0                                                        | 1.76E+0                                     |
| JD150      | 251201      | Glass fiber and glass fiber products,<br>n.e.c.             | ガラス繊維・同製品                                                | 1.39E+1                                                                     | 4.54E+0                                               | 1.14E+0                                             | 3.19E+0                                                        | 2.44E+0                                     |
| JD151      | 251909      | Other glass products                                        | その他のガラス製品                                                | 1.08E+1                                                                     | 4.45E+0                                               | 2.88E+0                                             | 3.51E+0                                                        | 2.97E+0                                     |
| JD152      | 252101      | Cement                                                      | セメント                                                     | 1.49E+2                                                                     | 1.32E+2                                               | 1.23E+1                                             | 4.64E+0                                                        | 2.99E-1                                     |
| JD153      | 252201      | Ready mixed concrete                                        | 生コンクリート                                                  | 3.14E+1                                                                     | 4.41E-1                                               | 2.83E+1                                             | 2.69E+0                                                        | 9.20E-1                                     |
| JD154      | 252301      | Cement products                                             | セメント製品                                                   | 1.38E+1                                                                     | 2.41E+0                                               | 9.03E+0                                             | 2.41E+0                                                        | 1.75E+0                                     |
| JD155      | 253101      | Pottery, china and earthenware                              | 陶磁器                                                      | 1.60E+1                                                                     | 8.89E+0                                               | 2.98E+0                                             | 4.17E+0                                                        | 2.37E+0                                     |
| JD156      | 259901      | Clay refractories                                           | 耐火物                                                      | 1.95E+1                                                                     | 4.91E+0                                               | 5.34E+0                                             | 9.24E+0                                                        | 4.29E+0                                     |
| JD157      | 259902      | Other structural clay products                              | その他の建設用土石製品                                              | 4.86E+1                                                                     | 3.99E+1                                               | 4.48E+0                                             | 4.26E+0                                                        | 8.72E-1                                     |
| JD158      | 259903      | Carbon and graphite products                                | 炭素・黒鉛製品                                                  | 1.53E+1                                                                     | 6.39E+0                                               | 4.45E+0                                             | 4.47E+0                                                        | 2.67E+0                                     |
| JD159      | 259904      | Abrasive                                                    | 研磨材                                                      | 1.38E+1                                                                     | 3.29E+0                                               | 2.37E+0                                             | 8.13E+0                                                        | 5.31E+0                                     |
| JD160      | 259909      | Miscellaneous ceramic, stone and clay<br>products           | その他の窯業・土石製品                                              | 1.08E+1                                                                     | 3.43E+0                                               | 3.35E+0                                             | 4.07E+0                                                        | 3.41E+0                                     |
| JD161      | 261101      | Pig iron                                                    | 鉄鉄                                                       | 6.24E+1                                                                     | 4.06E+1                                               | 4.67E+0                                             | 1.72E+1                                                        | 2.71E+0                                     |
| JD162      | 261102      | Ferro alloys                                                | フェロアロイ                                                   | 3.75E+1                                                                     | 1.85E+1                                               | 4.88E+0                                             | 1.41E+1                                                        | 3.82E+0                                     |
| JD163      | 261103      | Crude steel (converters)                                    | 粗鋼(転炉)                                                   | 4.36E+1                                                                     | 2.03E+0                                               | 2.68E+1                                             | 1.48E+1                                                        | 3.19E+0                                     |
| JD164      | 261104      | Crude steel (electric furnaces)                             | 粗鋼(電気炉)                                                  | 2.99E+1                                                                     | 9.43E-1                                               | 7.77E+0                                             | 2.12E+1                                                        | 1.01E+1                                     |
| JD165      | 261201      | Scrap iron                                                  | 鉄屑                                                       | 0.00E+0                                                                     | 0.00E+0                                               | 0.00E+0                                             | 0.00E+0                                                        | 0.00E+0                                     |
| JD166      | 262101      | Hot rolled steel                                            | 熱間圧延鋼材                                                   | 2.88E+1                                                                     | 1.02E+0                                               | 1.63E+1                                             | 1.15E+1                                                        | 4.05E+0                                     |
| JD167      | 262201      | Steel pipes and tubes                                       | 鋼管                                                       | 2.06E+1                                                                     | 7.84E-1                                               | 1.05E+1                                             | 9.33E+0                                                        | 4.70E+0                                     |
| JD168      | 262301      | Cold-finished steel                                         | 冷間仕上鋼材                                                   | 2.32E+1                                                                     | 1.18E+0                                               | 1.24E+1                                             | 9.64E+0                                                        | 4.13E+0                                     |
| JD169      | 262302      | Coated steel                                                | めっき鋼材                                                    | 1.81E+1                                                                     | 6.50E-1                                               | 1.01E+1                                             | 7.34E+0                                                        | 3.94E+0                                     |
| JD170      | 263101      | Cast and forged steel                                       | 鑄鍛鋼                                                      | 1.62E+1                                                                     | 1.12E+0                                               | 7.03E+0                                             | 8.06E+0                                                        | 5.75E+0                                     |
| JD171      | 263102      | Cast iron pipes and tubes                                   | 鑄鉄管                                                      | 1.48E+1                                                                     | 6.05E+0                                               | 6.02E+0                                             | 2.70E+0                                                        | 1.77E+0                                     |
| JD172      | 263103      | Cast and forged materials (iron)                            | 鑄鉄品及び鍛工品(鉄)                                              | 1.69E+1                                                                     | 2.39E+0                                               | 1.01E+1                                             | 4.42E+0                                                        | 2.26E+0                                     |
| JD173      | 264901      | Iron and steel shearing and slitting                        | 鉄鋼シャースリット業                                               | 1.65E+1                                                                     | 1.84E-1                                               | 9.79E+0                                             | 6.57E+0                                                        | 3.92E+0                                     |
| JD174      | 264909      | Other iron or steel products                                | その他の鉄鋼製品                                                 | 1.24E+1                                                                     | 1.57E+0                                               | 6.63E+0                                             | 4.16E+0                                                        | 3.19E+0                                     |
| JD175      | 271101      | Copper                                                      | 銅                                                        | 2.83E+1                                                                     | 1.30E+0                                               | 1.91E+0                                             | 2.51E+1                                                        | 1.07E+1                                     |
| JD176      | 271102      | Lead and zinc (inc. regenerated lead)                       | 鉛・亜鉛(含再生)                                                | 2.02E+1                                                                     | 1.48E+0                                               | 4.96E+0                                             | 1.37E+1                                                        | 7.44E+0                                     |
| JD177      | 271103      | Aluminum (inc. regenerated aluminum)                        | アルミニウム(含再生)                                              | 2.15E+1                                                                     | 5.66E+0                                               | 3.54E+0                                             | 1.23E+1                                                        | 6.09E+0                                     |
| JD178      | 271109      | Other non-ferrous metals                                    | その他の非鉄金属地金                                               | 2.36E+1                                                                     | 5.11E-1                                               | 2.47E+0                                             | 2.06E+1                                                        | 1.04E+1                                     |
| JD179      | 271201      | Non-ferrous metal scrap                                     | 非鉄金属屑                                                    | 0.00E+0                                                                     | 0.00E+0                                               | 0.00E+0                                             | 0.00E+0                                                        | 0.00E+0                                     |
| JD180      | 272101      | Electric wires and cables                                   | 電線・ケーブル                                                  | 1.66E+1                                                                     | 1.61E-1                                               | 2.69E+0                                             | 1.38E+1                                                        | 7.38E+0                                     |
| JD181      | 272102      | Optical fiber cables                                        | 光ファイバケーブル                                                | 1.37E+1                                                                     | 1.94E-1                                               | 4.17E+0                                             | 9.33E+0                                                        | 5.95E+0                                     |
| JD182      | 272201      | Rolled and drawn copper and copper<br>alloys                | 伸銅品                                                      | 2.00E+1                                                                     | 4.19E-1                                               | 2.82E+0                                             | 1.68E+1                                                        | 9.23E+0                                     |
| JD183      | 272202      | Rolled and drawn aluminum                                   | アルミ圧延製品                                                  | 3.14E+1                                                                     | 1.17E+0                                               | 1.80E+0                                             | 2.84E+1                                                        | 8.40E+0                                     |
| JD184      | 272203      | Non-ferrous metal castings and forgings                     | 非鉄金属成形材                                                  | 1.90E+1                                                                     | 7.26E-1                                               | 3.68E+0                                             | 1.46E+1                                                        | 7.57E+0                                     |
| JD185      | 272204      | Nuclear fuels                                               | 核燃料                                                      | 1.35E+1                                                                     | 0.00E+0                                               | 9.81E-1                                             | 1.25E+1                                                        | 1.35E+1                                     |

Table A9: Embodied global NOx intensities of Japanese goods and services based on producer price in 2005 [3/5]

| Sector no. | Sector code | Sector name<br>[Japanese domestic commodity]               | Sector name in Japanese<br>[Japanese domestic commodity] | Embodied global NO <sub>x</sub> intensities based on producer price in 2005 |                                                       |                                                     |                                                                |                                             |
|------------|-------------|------------------------------------------------------------|----------------------------------------------------------|-----------------------------------------------------------------------------|-------------------------------------------------------|-----------------------------------------------------|----------------------------------------------------------------|---------------------------------------------|
|            |             |                                                            |                                                          | Total                                                                       | (D) Direct emissions<br>in Japan during<br>production | (S) Induced<br>emissions in Japan<br>through supply | (F) Induced emissions<br>in foreign country's<br>supply chains | Coefficient of variance<br>of the intensity |
|            |             |                                                            |                                                          | kg/M-JPY                                                                    | kg/M-JPY                                              | kg/M-JPY                                            | kg/M-JPY                                                       | %                                           |
| JD186      | 272209      | Other non-ferrous metal products                           | その他の非鉄金属製品                                               | 3.55E+1                                                                     | 2.85E-1                                               | 1.97E+0                                             | 3.33E+1                                                        | 1.30E+1                                     |
| JD187      | 281101      | Metal products for construction                            | 建設用金属製品                                                  | 1.11E+1                                                                     | 2.53E-1                                               | 5.69E+0                                             | 5.18E+0                                                        | 4.32E+0                                     |
| JD188      | 281201      | Metal products for architecture                            | 建築用金属製品                                                  | 1.13E+1                                                                     | 3.92E-1                                               | 3.21E+0                                             | 7.74E+0                                                        | 6.80E+0                                     |
| JD189      | 289101      | Gas and oil appliances and heating and cooking apparatus   | ガス・石油機器及び暖房機器                                            | 1.06E+1                                                                     | 1.79E-1                                               | 4.39E+0                                             | 5.99E+0                                                        | 5.30E+0                                     |
| JD190      | 289901      | Bolts, nuts, rivets and springs                            | ボルト・ナット・リベット及びスプリング                                      | 9.97E+0                                                                     | 3.15E-1                                               | 4.15E+0                                             | 5.50E+0                                                        | 6.94E+0                                     |
| JD191      | 289902      | Metal containers, fabricated plate and sheet metal         | 金属製容器及び製缶板金製品                                            | 8.57E+0                                                                     | 2.76E-1                                               | 4.06E+0                                             | 4.24E+0                                                        | 5.25E+0                                     |
| JD192      | 289903      | Plumber's supplies, powder metallurgy products and tools   | 配管工事付属品・粉末や金製品・道具類                                       | 1.02E+1                                                                     | 3.61E-1                                               | 2.90E+0                                             | 6.91E+0                                                        | 6.87E+0                                     |
| JD193      | 289909      | Other metal products                                       | その他の金属製品                                                 | 9.33E+0                                                                     | 5.10E-1                                               | 3.42E+0                                             | 5.40E+0                                                        | 5.66E+0                                     |
| JD194      | 301101      | Boilers                                                    | ボイラ                                                      | 5.40E+0                                                                     | 4.39E-1                                               | 2.18E+0                                             | 2.79E+0                                                        | 4.92E+0                                     |
| JD195      | 301102      | Turbines                                                   | タービン                                                     | 6.67E+0                                                                     | 2.90E-1                                               | 2.65E+0                                             | 3.72E+0                                                        | 5.54E+0                                     |
| JD196      | 301103      | Engines                                                    | 原動機                                                      | 8.06E+0                                                                     | 1.85E-1                                               | 3.29E+0                                             | 4.59E+0                                                        | 5.20E+0                                     |
| JD197      | 301201      | Conveyors                                                  | 運搬機械                                                     | 8.79E+0                                                                     | 6.99E-2                                               | 2.72E+0                                             | 6.00E+0                                                        | 6.38E+0                                     |
| JD198      | 301301      | Refrigerators and air conditioning apparatus               | 冷凍機・温湿調整装置                                               | 8.41E+0                                                                     | 9.67E-2                                               | 2.26E+0                                             | 6.06E+0                                                        | 6.49E+0                                     |
| JD199      | 301901      | Pumps and compressors                                      | ポンプ及び圧縮機                                                 | 8.16E+0                                                                     | 1.15E-1                                               | 3.09E+0                                             | 4.96E+0                                                        | 5.41E+0                                     |
| JD200      | 301902      | Machinists' precision tools                                | 機械工具                                                     | 7.25E+0                                                                     | 8.27E-2                                               | 2.76E+0                                             | 4.41E+0                                                        | 5.82E+0                                     |
| JD201      | 301909      | Other general industrial machinery and equipment           | その他の一般産業機械及び装置                                           | 7.13E+0                                                                     | 1.76E-1                                               | 3.15E+0                                             | 3.80E+0                                                        | 4.82E+0                                     |
| JD202      | 302101      | Machinery and equipment for construction and mining        | 建設・鉱山機械                                                  | 7.32E+0                                                                     | 1.11E-1                                               | 2.99E+0                                             | 4.22E+0                                                        | 5.27E+0                                     |
| JD203      | 302201      | Chemical machinery                                         | 化学機械                                                     | 5.44E+0                                                                     | 6.36E-2                                               | 2.36E+0                                             | 3.02E+0                                                        | 5.10E+0                                     |
| JD204      | 302301      | Industrial robots                                          | 産業用ロボット                                                  | 6.45E+0                                                                     | 0.00E+0                                               | 2.53E+0                                             | 3.92E+0                                                        | 5.82E+0                                     |
| JD205      | 302401      | Metal machine tools                                        | 金属工作機械                                                   | 5.66E+0                                                                     | 3.46E-2                                               | 2.50E+0                                             | 3.12E+0                                                        | 5.24E+0                                     |
| JD206      | 302402      | Metal processing machinery                                 | 金属加工機械                                                   | 6.12E+0                                                                     | 3.18E-2                                               | 3.07E+0                                             | 3.02E+0                                                        | 4.67E+0                                     |
| JD207      | 302901      | Machinery for agricultural use                             | 農業用機械                                                    | 6.26E+0                                                                     | 1.85E-1                                               | 2.90E+0                                             | 3.18E+0                                                        | 4.60E+0                                     |
| JD208      | 302902      | Textile machinery                                          | 繊維機械                                                     | 7.43E+0                                                                     | 1.88E-1                                               | 2.63E+0                                             | 4.61E+0                                                        | 5.66E+0                                     |
| JD209      | 302903      | Food processing machinery and equipment                    | 食品機械・同装置                                                 | 7.44E+0                                                                     | 2.28E-1                                               | 3.29E+0                                             | 3.92E+0                                                        | 4.92E+0                                     |
| JD210      | 302904      | Semiconductor making equipment                             | 半導体製造装置                                                  | 5.38E+0                                                                     | 7.85E-2                                               | 2.26E+0                                             | 3.04E+0                                                        | 5.88E+0                                     |
| JD211      | 302905      | Vacuum equipment and vacuum component                      | 真空装置・真空機器                                                | 6.97E+0                                                                     | 2.32E-1                                               | 2.88E+0                                             | 3.85E+0                                                        | 4.94E+0                                     |
| JD212      | 302909      | Other special machinery for industrial use                 | その他の特殊産業用機械                                              | 6.67E+0                                                                     | 1.06E-1                                               | 2.49E+0                                             | 4.07E+0                                                        | 5.72E+0                                     |
| JD213      | 303101      | Metal molds                                                | 金型                                                       | 6.01E+0                                                                     | 1.88E-1                                               | 3.06E+0                                             | 2.77E+0                                                        | 4.22E+0                                     |
| JD214      | 303102      | Bearings                                                   | ベアリング                                                    | 9.23E+0                                                                     | 4.12E-1                                               | 4.79E+0                                             | 4.03E+0                                                        | 3.90E+0                                     |
| JD215      | 303109      | Other general machines and parts                           | その他の一般機械器具及び部品                                           | 7.79E+0                                                                     | 2.57E-1                                               | 2.90E+0                                             | 4.63E+0                                                        | 5.33E+0                                     |
| JD216      | 311101      | Copy machine                                               | 複写機                                                      | 8.47E+0                                                                     | 1.12E-1                                               | 2.43E+0                                             | 5.93E+0                                                        | 7.81E+0                                     |
| JD217      | 311109      | Other office machines                                      | その他の事務用機械                                                | 7.23E+0                                                                     | 5.69E-2                                               | 2.05E+0                                             | 5.12E+0                                                        | 7.85E+0                                     |
| JD218      | 311201      | Machinery for service industry                             | サービス用機器                                                  | 7.07E+0                                                                     | 5.27E-2                                               | 2.33E+0                                             | 4.68E+0                                                        | 6.78E+0                                     |
| JD219      | 321101      | Rotating electrical equipment                              | 回転電気機械                                                   | 1.06E+1                                                                     | 7.41E-2                                               | 3.25E+0                                             | 7.27E+0                                                        | 6.10E+0                                     |
| JD220      | 321102      | Transformers and reactors                                  | 変圧器・変成器                                                  | 1.14E+1                                                                     | 2.91E-2                                               | 2.96E+0                                             | 8.37E+0                                                        | 6.74E+0                                     |
| JD221      | 321103      | Relay switches and switchboards                            | 開閉制御装置及び配電盤                                              | 7.86E+0                                                                     | 4.36E-2                                               | 2.39E+0                                             | 5.43E+0                                                        | 6.28E+0                                     |
| JD222      | 321104      | Wiring devices and supplies                                | 配線器具                                                     | 9.16E+0                                                                     | 3.73E-2                                               | 2.05E+0                                             | 7.07E+0                                                        | 6.78E+0                                     |
| JD223      | 321105      | Electrical equipment for internal combustion engines       | 内燃機関電装品                                                  | 6.99E+0                                                                     | 7.74E-2                                               | 2.49E+0                                             | 4.41E+0                                                        | 5.55E+0                                     |
| JD224      | 321109      | Other electrical devices and parts                         | その他の産業用電気機器                                              | 8.49E+0                                                                     | 2.08E-2                                               | 2.55E+0                                             | 5.92E+0                                                        | 6.14E+0                                     |
| JD225      | 322101      | Applied electronic equipment                               | 電子応用装置                                                   | 7.03E+0                                                                     | 1.21E-2                                               | 1.62E+0                                             | 5.40E+0                                                        | 9.38E+0                                     |
| JD226      | 323101      | Electric measuring instruments                             | 電気計測器                                                    | 6.10E+0                                                                     | 5.54E-3                                               | 1.51E+0                                             | 4.58E+0                                                        | 8.92E+0                                     |
| JD227      | 324101      | Electric bulbs                                             | 電球類                                                      | 5.59E+0                                                                     | 2.18E-2                                               | 2.42E+0                                             | 3.15E+0                                                        | 5.57E+0                                     |
| JD228      | 324102      | Electric lighting fixtures and apparatus                   | 電気照明器具                                                   | 7.17E+0                                                                     | 1.20E-2                                               | 2.24E+0                                             | 4.92E+0                                                        | 6.35E+0                                     |
| JD229      | 324103      | Batteries                                                  | 電池                                                       | 1.40E+1                                                                     | 5.62E-2                                               | 3.11E+0                                             | 1.09E+1                                                        | 7.63E+0                                     |
| JD230      | 324109      | Other electrical devices and parts                         | その他の電気機械器具                                               | 1.61E+1                                                                     | 3.71E-1                                               | 1.87E+0                                             | 1.38E+1                                                        | 1.05E+1                                     |
| JD231      | 325101      | Household air-conditioners                                 | 民生用エアコンディショナ                                             | 7.50E+0                                                                     | 3.96E-2                                               | 2.36E+0                                             | 5.10E+0                                                        | 6.88E+0                                     |
| JD232      | 325102      | Household electric appliances (except air-conditioners)    | 民生用電気機器(除エアコン)                                           | 8.27E+0                                                                     | 3.44E-2                                               | 2.28E+0                                             | 5.96E+0                                                        | 6.87E+0                                     |
| JD233      | 331101      | Video recording and playback equipment                     | ビデオ機器                                                    | 9.02E+0                                                                     | 1.19E-3                                               | 2.10E+0                                             | 6.91E+0                                                        | 8.22E+0                                     |
| JD234      | 331102      | Electric audio equipment                                   | 電気音響機器                                                   | 8.32E+0                                                                     | 9.92E-2                                               | 2.08E+0                                             | 6.14E+0                                                        | 7.94E+0                                     |
| JD235      | 331103      | Radio and television sets                                  | ラジオ・テレビ受信機                                               | 7.28E+0                                                                     | 7.12E-2                                               | 2.15E+0                                             | 5.06E+0                                                        | 7.69E+0                                     |
| JD236      | 332101      | Wired communication equipment                              | 有線電気通信機器                                                 | 8.36E+0                                                                     | 9.95E-2                                               | 1.85E+0                                             | 6.41E+0                                                        | 7.76E+0                                     |
| JD237      | 332102      | Cellular phones                                            | 携帯電話機                                                    | 8.08E+0                                                                     | 3.10E-2                                               | 1.75E+0                                             | 6.30E+0                                                        | 8.51E+0                                     |
| JD238      | 332103      | Radio communication equipment (except cellular phones)     | 無線電気通信機器(除携帯電話機)                                         | 9.18E+0                                                                     | 7.40E-3                                               | 1.70E+0                                             | 7.47E+0                                                        | 8.40E+0                                     |
| JD239      | 332109      | Other communication equipment                              | その他の電気通信機器                                               | 6.74E+0                                                                     | 5.06E-2                                               | 1.80E+0                                             | 4.89E+0                                                        | 7.41E+0                                     |
| JD240      | 333101      | Personal Computers                                         | パーソナルコンピュータ                                              | 9.43E+0                                                                     | 1.67E-2                                               | 1.57E+0                                             | 7.84E+0                                                        | 1.00E+1                                     |
| JD241      | 333102      | Electronic computing equipment (except personal computers) | 電子計算機本体(除パソコン)                                           | 7.88E+0                                                                     | 2.15E-2                                               | 1.38E+0                                             | 6.48E+0                                                        | 1.00E+1                                     |
| JD242      | 333103      | Electronic computing equipment (accessory equipment)       | 電子計算機付属装置                                                | 7.60E+0                                                                     | 6.89E-3                                               | 1.78E+0                                             | 5.82E+0                                                        | 9.20E+0                                     |
| JD243      | 341101      | Semiconductor devices                                      | 半導体素子                                                    | 6.06E+0                                                                     | 1.17E-1                                               | 2.02E+0                                             | 3.93E+0                                                        | 6.03E+0                                     |
| JD244      | 341102      | Integrated circuits                                        | 集積回路                                                     | 7.97E+0                                                                     | 1.24E-1                                               | 2.73E+0                                             | 5.11E+0                                                        | 6.41E+0                                     |
| JD245      | 342101      | Electron tubes                                             | 電子管                                                      | 9.73E+0                                                                     | 1.69E-1                                               | 3.42E+0                                             | 6.33E+0                                                        | 6.13E+0                                     |
| JD246      | 342102      | Liquid crystal element                                     | 液晶素子                                                     | 8.33E+0                                                                     | 7.78E-2                                               | 2.16E+0                                             | 6.09E+0                                                        | 9.22E+0                                     |
| JD247      | 342103      | Magnetic tapes and discs                                   | 磁気テープ・磁気ディスク                                             | 7.70E+0                                                                     | 3.31E-1                                               | 3.77E+0                                             | 3.59E+0                                                        | 4.73E+0                                     |
| JD248      | 342109      | Other electronic components                                | その他の電子部品                                                 | 9.81E+0                                                                     | 1.26E-1                                               | 2.67E+0                                             | 7.01E+0                                                        | 6.69E+0                                     |
| JD249      | 351101      | Passenger motor cars                                       | 乗用車                                                      | 8.08E+0                                                                     | 2.57E-2                                               | 3.29E+0                                             | 4.77E+0                                                        | 5.29E+0                                     |
| JD250      | 352101      | Trucks, buses and other cars                               | トラック・バス・その他の自動車                                          | 8.28E+0                                                                     | 4.26E-2                                               | 3.24E+0                                             | 5.00E+0                                                        | 5.44E+0                                     |
| JD251      | 353101      | Two-wheel motor vehicles                                   | 二輪自動車                                                    | 7.75E+0                                                                     | 6.14E-2                                               | 2.65E+0                                             | 5.03E+0                                                        | 5.77E+0                                     |
| JD252      | 354101      | Motor vehicle bodies                                       | 自動車車体                                                    | 8.99E+0                                                                     | 4.46E-2                                               | 3.90E+0                                             | 5.04E+0                                                        | 5.76E+0                                     |
| JD253      | 354102      | Internal combustion engines for motor vehicles and parts   | 自動車用内燃機関・同部品                                             | 9.31E+0                                                                     | 2.09E-1                                               | 3.05E+0                                             | 6.05E+0                                                        | 5.67E+0                                     |
| JD254      | 354103      | Motor vehicle parts and accessories                        | 自動車部品                                                    | 8.13E+0                                                                     | 2.03E-1                                               | 3.18E+0                                             | 4.75E+0                                                        | 5.24E+0                                     |
| JD255      | 361101      | Steel ships                                                | 鋼船                                                       | 1.05E+1                                                                     | 8.29E-2                                               | 5.54E+0                                             | 4.93E+0                                                        | 4.31E+0                                     |
| JD256      | 361102      | Ships (except steel ships)                                 | その他の船舶                                                   | 5.75E+0                                                                     | 1.49E-1                                               | 2.72E+0                                             | 2.87E+0                                                        | 4.55E+0                                     |
| JD257      | 361103      | Internal combustion engines for vessels                    | 船用内燃機関                                                   | 8.76E+0                                                                     | 1.22E+0                                               | 4.05E+0                                             | 3.50E+0                                                        | 3.55E+0                                     |
| JD258      | 361110      | Repair of ships                                            | 船舶修理                                                     | 6.28E+0                                                                     | 3.57E-2                                               | 3.07E+0                                             | 3.17E+0                                                        | 4.75E+0                                     |
| JD259      | 362101      | Rolling stock                                              | 鉄道車両                                                     | 9.05E+0                                                                     | 4.97E-1                                               | 4.12E+0                                             | 4.43E+0                                                        | 4.29E+0                                     |
| JD260      | 362110      | Repair of rolling stock                                    | 鉄道車両修理                                                   | 1.04E+1                                                                     | 1.19E+0                                               | 4.44E+0                                             | 4.82E+0                                                        | 3.96E+0                                     |
| JD261      | 362201      | Aircrafts                                                  | 航空機                                                      | 6.44E+0                                                                     | 1.10E+0                                               | 1.84E+0                                             | 3.49E+0                                                        | 8.40E+0                                     |
| JD262      | 362210      | Repair of aircrafts                                        | 航空機修理                                                    | 6.42E+0                                                                     | 0.00E+0                                               | 9.99E-1                                             | 5.43E+0                                                        | 2.43E+1                                     |
| JD263      | 362901      | Bicycles                                                   | 自転車                                                      | 1.42E+1                                                                     | 4.96E-1                                               | 2.76E+0                                             | 1.10E+1                                                        | 7.91E+0                                     |
| JD264      | 362909      | Other transport equipment                                  | その他の輸送機械                                                 | 7.67E+0                                                                     | 3.75E-1                                               | 3.46E+0                                             | 3.84E+0                                                        | 4.49E+0                                     |
| JD265      | 371101      | Camera                                                     | カメラ                                                      | 6.70E+0                                                                     | 1.47E-1                                               | 1.80E+0                                             | 4.75E+0                                                        | 7.57E+0                                     |
| JD266      | 371109      | Other photographic and optical instruments                 | その他の光学機械                                                 | 6.52E+0                                                                     | 2.24E-1                                               | 2.58E+0                                             | 3.71E+0                                                        | 5.22E+0                                     |
| JD267      | 371201      | Watches and clocks                                         | 時計                                                       | 6.62E+0                                                                     | 8.82E-2                                               | 1.92E+0                                             | 4.61E+0                                                        | 7.66E+0                                     |
| JD268      | 371901      | Professional and scientific instruments                    | 理化学機械器具                                                  | 4.28E+0                                                                     | 5.68E-2                                               | 2.03E+0                                             | 2.19E+0                                                        | 4.72E+0                                     |

Table A9: Embodied global NOx intensities of Japanese goods and services based on producer price in 2005 [4/5]

| Sector no. | Sector code | Sector name<br>[Japanese domestic commodity]                   | Sector name in Japanese<br>[Japanese domestic commodity] | Embodied global NO <sub>x</sub> intensities based on producer price in 2005 |                                                       |                                                     |                                                                |                                             |
|------------|-------------|----------------------------------------------------------------|----------------------------------------------------------|-----------------------------------------------------------------------------|-------------------------------------------------------|-----------------------------------------------------|----------------------------------------------------------------|---------------------------------------------|
|            |             |                                                                |                                                          | Total                                                                       | (D) Direct emissions<br>in Japan during<br>production | (S) Induced<br>emissions in Japan<br>through supply | (F) Induced emissions<br>in foreign country's<br>supply chains | Coefficient of variance<br>of the intensity |
|            |             |                                                                |                                                          | kg/M-JPY                                                                    | kg/M-JPY                                              | kg/M-JPY                                            | kg/M-JPY                                                       | %                                           |
| JD269      | 371902      | Analytical instruments, testing machine, measuring instruments | 分析器・試験機・計量器・測定器                                          | 5.31E+0                                                                     | 1.01E-1                                               | 1.86E+0                                             | 3.35E+0                                                        | 6.18E+0                                     |
| JD270      | 371903      | Medical instruments                                            | 医療用機械器具                                                  | 6.41E+0                                                                     | 2.75E-1                                               | 2.06E+0                                             | 4.07E+0                                                        | 5.97E+0                                     |
| JD271      | 391101      | Toys and games                                                 | がらん具                                                     | 9.34E+0                                                                     | 2.49E-1                                               | 1.99E+0                                             | 7.10E+0                                                        | 7.76E+0                                     |
| JD272      | 391102      | Sporting and athletic goods                                    | 運動用品                                                     | 8.51E+0                                                                     | 2.36E-1                                               | 3.11E+0                                             | 5.17E+0                                                        | 5.53E+0                                     |
| JD273      | 391901      | Musical instruments                                            | 楽器                                                       | 5.33E+0                                                                     | 1.21E-1                                               | 1.94E+0                                             | 3.27E+0                                                        | 5.38E+0                                     |
| JD274      | 391902      | Audio and video records, other information recording media     | 情報記録物                                                    | 4.71E+0                                                                     | 1.28E-1                                               | 2.14E+0                                             | 2.44E+0                                                        | 5.23E+0                                     |
| JD275      | 391903      | Stationery                                                     | 筆記具・文具                                                   | 5.42E+0                                                                     | 1.52E-1                                               | 2.43E+0                                             | 2.84E+0                                                        | 5.04E+0                                     |
| JD276      | 391904      | Jewelry and adornments                                         | 身辺細貨品                                                    | 1.14E+1                                                                     | 8.74E-2                                               | 1.69E+0                                             | 9.61E+0                                                        | 8.82E+0                                     |
| JD277      | 391905      | "Tatami" (straw matting) and straw products                    | 畳・わら加工品                                                  | 1.47E+1                                                                     | 1.88E-1                                               | 1.29E+0                                             | 1.33E+1                                                        | 1.01E+1                                     |
| JD278      | 391906      | Ordnance                                                       | 武器                                                       | 7.21E+0                                                                     | 3.99E-2                                               | 2.42E+0                                             | 4.75E+0                                                        | 5.91E+0                                     |
| JD279      | 391909      | Miscellaneous manufacturing products                           | その他の製造工業製品                                               | 6.48E+0                                                                     | 1.61E-1                                               | 2.42E+0                                             | 3.90E+0                                                        | 5.26E+0                                     |
| JD280      | 392101      | Reuse and recycling                                            | 再生資源回収・加工処理                                              | 9.21E+0                                                                     | 4.54E-1                                               | 7.61E+0                                             | 1.15E+0                                                        | 1.89E+0                                     |
| JD281      | 411101      | Residential construction (wooden)                              | 住宅建築(木造)                                                 | 5.95E+0                                                                     | 1.46E-1                                               | 2.25E+0                                             | 3.56E+0                                                        | 5.02E+0                                     |
| JD282      | 411102      | Residential construction (non-wooden)                          | 住宅建築(非木造)                                                | 6.88E+0                                                                     | 2.71E-1                                               | 3.03E+0                                             | 3.58E+0                                                        | 4.51E+0                                     |
| JD283      | 411201      | Non-residential construction (wooden)                          | 非住宅建築(木造)                                                | 6.10E+0                                                                     | 1.46E-1                                               | 2.38E+0                                             | 3.57E+0                                                        | 5.01E+0                                     |
| JD284      | 411202      | Non-residential construction (non-wooden)                      | 非住宅建築(非木造)                                               | 7.20E+0                                                                     | 4.15E-1                                               | 2.94E+0                                             | 3.85E+0                                                        | 4.74E+0                                     |
| JD285      | 412101      | Repair of construction                                         | 建設補修                                                     | 6.34E+0                                                                     | 3.85E-1                                               | 2.79E+0                                             | 3.17E+0                                                        | 4.53E+0                                     |
| JD286      | 413101      | Public construction of roads                                   | 道路関係公共事業                                                 | 6.49E+0                                                                     | 6.23E-1                                               | 3.60E+0                                             | 2.26E+0                                                        | 3.55E+0                                     |
| JD287      | 413102      | Public construction of rivers, drainages and others            | 河川・下水道・その他の公共事業                                          | 6.20E+0                                                                     | 4.55E-1                                               | 3.70E+0                                             | 2.05E+0                                                        | 3.28E+0                                     |
| JD288      | 413103      | Agricultural public construction                               | 農林関係公共事業                                                 | 7.02E+0                                                                     | 6.53E-1                                               | 4.04E+0                                             | 2.33E+0                                                        | 3.38E+0                                     |
| JD289      | 413201      | Railway construction                                           | 鉄道軌道建設                                                   | 6.99E+0                                                                     | 2.22E-1                                               | 3.92E+0                                             | 2.85E+0                                                        | 3.52E+0                                     |
| JD290      | 413202      | Electric power facilities construction                         | 電力施設建設                                                   | 8.98E+0                                                                     | 1.84E-1                                               | 2.91E+0                                             | 5.89E+0                                                        | 5.96E+0                                     |
| JD291      | 413203      | Telecommunication facilities construction                      | 電気通信施設建設                                                 | 7.71E+0                                                                     | 1.33E-1                                               | 2.48E+0                                             | 5.10E+0                                                        | 5.93E+0                                     |
| JD292      | 413209      | Other civil engineering and construction                       | その他の土木建設                                                 | 6.19E+0                                                                     | 3.16E-1                                               | 3.53E+0                                             | 2.34E+0                                                        | 3.53E+0                                     |
| JD293      | 5111001     | Electricity                                                    | 事業用電力                                                    | 3.74E+1                                                                     | 3.10E+1                                               | 2.25E+0                                             | 4.13E+0                                                        | 1.40E+0                                     |
| JD294      | 511104      | On-site power generation                                       | 自家発電                                                     | 9.56E+1                                                                     | 8.77E+1                                               | 2.54E+0                                             | 5.34E+0                                                        | 7.30E-1                                     |
| JD295      | 512101      | Gas supply                                                     | 都市ガス                                                     | 7.81E+0                                                                     | 1.85E-3                                               | 2.04E+0                                             | 5.76E+0                                                        | 1.39E+1                                     |
| JD296      | 512201      | Steam and hot water supply                                     | 熱供給業                                                     | 1.19E+1                                                                     | 4.07E+0                                               | 5.22E+0                                             | 2.57E+0                                                        | 3.15E+0                                     |
| JD297      | 521101      | Water supply                                                   | 上水道・簡易水道                                                 | 2.41E+0                                                                     | 1.14E-1                                               | 1.32E+0                                             | 9.69E-1                                                        | 3.86E+0                                     |
| JD298      | 521102      | Industrial water supply                                        | 工業用水                                                     | 2.26E+0                                                                     | 4.50E-2                                               | 1.58E+0                                             | 6.29E-1                                                        | 2.83E+0                                     |
| JD299      | 521103      | Sewage disposal **                                             | 下水道★                                                     | 1.47E+1                                                                     | 5.10E+0                                               | 6.00E+0                                             | 3.59E+0                                                        | 2.68E+0                                     |
| JD300      | 521201      | Waste management services (public) **                          | 廃棄物処理(公営)★★                                              | 8.33E+0                                                                     | 3.52E+0                                               | 2.96E+0                                             | 1.84E+0                                                        | 2.36E+0                                     |
| JD301      | 521202      | Waste management services (private)                            | 廃棄物処理(産業)                                                | 5.04E+0                                                                     | 2.12E+0                                               | 1.63E+0                                             | 1.29E+0                                                        | 2.73E+0                                     |
| JD302      | 611101      | Wholesale trade                                                | 卸売                                                       | 2.04E+0                                                                     | 3.83E-2                                               | 7.85E-1                                             | 1.22E+0                                                        | 2.31E+1                                     |
| JD303      | 611201      | Retail trade                                                   | 小売                                                       | 3.14E+0                                                                     | 4.12E-1                                               | 1.81E+0                                             | 9.16E-1                                                        | 3.47E+0                                     |
| JD304      | 621101      | Financial service                                              | 金融                                                       | 1.28E+0                                                                     | 6.14E-2                                               | 6.23E-1                                             | 6.00E-1                                                        | 6.99E+0                                     |
| JD305      | 621201      | Life insurance                                                 | 生命保険                                                     | 1.51E+0                                                                     | 7.90E-2                                               | 7.20E-1                                             | 7.14E-1                                                        | 6.58E+0                                     |
| JD306      | 621202      | Non-life insurance                                             | 損害保険                                                     | 1.30E+0                                                                     | 6.35E-2                                               | 6.95E-1                                             | 5.44E-1                                                        | 6.01E+0                                     |
| JD307      | 641101      | Real estate agencies and managers                              | 不動産仲介・管理業                                                | 1.72E+0                                                                     | 1.37E-1                                               | 1.06E+0                                             | 5.23E-1                                                        | 3.67E+0                                     |
| JD308      | 641102      | Real estate rental service                                     | 不動産賃貸業                                                   | 1.48E+0                                                                     | 1.93E-1                                               | 9.39E-1                                             | 3.45E-1                                                        | 2.76E+0                                     |
| JD309      | 642101      | House rent                                                     | 住宅賃貸料                                                    | 1.06E+0                                                                     | 2.42E-1                                               | 4.20E-1                                             | 4.02E-1                                                        | 3.82E+0                                     |
| JD310      | 642201      | House rent (imputed house rent)                                | 住宅賃貸料(帰属家賃)                                              | 4.15E-1                                                                     | 0.00E+0                                               | 2.10E-1                                             | 2.05E-1                                                        | 4.78E+0                                     |
| JD311      | 711101      | Railway transport (passengers)                                 | 鉄道旅客輸送                                                   | 4.28E+0                                                                     | 3.84E-2                                               | 2.81E+0                                             | 1.43E+0                                                        | 4.77E+0                                     |
| JD312      | 711201      | Railway transport (freight)                                    | 鉄道貨物輸送                                                   | 5.70E+0                                                                     | 1.38E-1                                               | 3.94E+0                                             | 1.62E+0                                                        | 3.02E+0                                     |
| JD313      | 712101      | Bus transport service                                          | バス                                                       | 5.41E+0                                                                     | 2.60E+0                                               | 8.97E-1                                             | 1.92E+0                                                        | 5.62E+0                                     |
| JD314      | 712102      | Hired car and taxi transport                                   | ハイヤー・タクシー                                                | 2.14E+0                                                                     | 3.19E-2                                               | 5.87E-1                                             | 1.52E+0                                                        | 1.16E+1                                     |
| JD315      | 712201      | Road freight transport(except Self-transport by private cars)  | 道路貨物輸送(除自家輸送)                                            | 6.02E+0                                                                     | 2.99E+0                                               | 1.37E+0                                             | 1.66E+0                                                        | 4.88E+0                                     |
| JD316      | 713101      | Self-transport by private cars (passengers)                    | 自家輸送(旅客自動車)                                              | 1.02E+1                                                                     | 1.12E+0                                               | 2.97E+0                                             | 6.13E+0                                                        | 1.14E+1                                     |
| JD317      | 713201      | Self-transport by private cars (freight)                       | 自家輸送(貨物自動車)                                              | 1.52E+1                                                                     | 6.68E+0                                               | 2.98E+0                                             | 5.58E+0                                                        | 6.60E+0                                     |
| JD318      | 714101      | Ocean transport                                                | 外洋輸送                                                     | 1.25E+2                                                                     | 2.62E+1                                               | 1.99E+0                                             | 9.68E+1                                                        | 3.07E+1                                     |
| JD319      | 714201      | Coastal and inland water transport                             | 沿海・内水面輸送                                                 | 8.68E+1                                                                     | 8.10E+1                                               | 2.40E+0                                             | 3.37E+0                                                        | 6.17E-1                                     |
| JD320      | 714301      | Harbor transport service                                       | 港湾輸送                                                     | 7.52E+0                                                                     | 6.05E+0                                               | 1.77E-1                                             | 7.50E-1                                                        | 1.24E+0                                     |
| JD321      | 715101      | Air transport                                                  | 航空輸送                                                     | 7.91E+0                                                                     | 1.77E-1                                               | 1.15E+0                                             | 6.58E+0                                                        | 1.64E+1                                     |
| JD322      | 716101      | Consigned freight forwarding                                   | 貨物利用運送                                                   | 2.34E+0                                                                     | 6.23E-1                                               | 8.47E-1                                             | 8.75E-1                                                        | 5.15E+0                                     |
| JD323      | 717101      | Storage facility service                                       | 倉庫                                                       | 3.39E+0                                                                     | 1.27E-1                                               | 2.43E+0                                             | 8.35E-1                                                        | 2.53E+0                                     |
| JD324      | 718101      | Packing service                                                | こん包                                                      | 4.72E+0                                                                     | 8.96E-2                                               | 2.40E+0                                             | 2.23E+0                                                        | 4.20E+0                                     |
| JD325      | 718901      | Facility service for road transport                            | 道路輸送施設提供                                                 | 1.95E+0                                                                     | 7.41E-2                                               | 1.31E+0                                             | 5.65E-1                                                        | 3.17E+0                                     |
| JD326      | 718902      | Port and water traffic control **                              | 水運施設管理★★                                                 | 1.16E+1                                                                     | 9.45E+0                                               | 1.00E+0                                             | 1.13E+0                                                        | 9.54E-1                                     |
| JD327      | 718903      | Services relating to water transport                           | その他の水運付帯サービス                                             | 1.82E+0                                                                     | 9.44E-1                                               | 4.47E-1                                             | 4.27E-1                                                        | 2.85E+0                                     |
| JD328      | 718904      | Airport and air traffic control (public) **                    | 航空施設管理(国営)★★                                             | 3.38E+0                                                                     | 2.75E-1                                               | 1.96E+0                                             | 1.15E+0                                                        | 3.54E+0                                     |
| JD329      | 718905      | Airport and air traffic control                                | 航空施設管理(産業)                                               | 3.70E+0                                                                     | 3.12E-1                                               | 2.26E+0                                             | 1.13E+0                                                        | 3.18E+0                                     |
| JD330      | 718906      | Services relating to air transport                             | その他の航空付帯サービス                                             | 1.96E+0                                                                     | 1.23E-1                                               | 1.12E+0                                             | 7.17E-1                                                        | 3.67E+0                                     |
| JD331      | 718909      | Travel agency and other services relating to transport         | 旅行・その他の運輸付帯サービス                                          | 1.76E+0                                                                     | 0.00E+0                                               | 7.92E-1                                             | 9.64E-1                                                        | 9.84E+0                                     |
| JD332      | 731101      | Postal service                                                 | 郵便・信書便                                                   | 1.68E+0                                                                     | 0.00E+0                                               | 9.07E-1                                             | 7.68E-1                                                        | 1.09E+1                                     |
| JD333      | 731201      | Fixed telecommunication                                        | 固定電気通信                                                   | 1.72E+0                                                                     | 0.00E+0                                               | 9.71E-1                                             | 7.49E-1                                                        | 7.11E+0                                     |
| JD334      | 731202      | Mobile telecommunication                                       | 移動電気通信                                                   | 1.16E+0                                                                     | 0.00E+0                                               | 6.54E-1                                             | 5.07E-1                                                        | 5.12E+0                                     |
| JD335      | 731203      | Other telecommunication                                        | その他の電気通信                                                 | 2.17E+0                                                                     | 0.00E+0                                               | 1.27E+0                                             | 8.94E-1                                                        | 5.88E+0                                     |
| JD336      | 731909      | Other services relating to communication                       | その他の通信サービス                                               | 1.93E+0                                                                     | 0.00E+0                                               | 1.16E+0                                             | 7.70E-1                                                        | 4.61E+0                                     |
| JD337      | 732101      | Public broadcasting                                            | 公共放送                                                     | 2.36E+0                                                                     | 0.00E+0                                               | 1.28E+0                                             | 1.08E+0                                                        | 7.79E+0                                     |
| JD338      | 732102      | Private broadcasting                                           | 民間放送                                                     | 2.44E+0                                                                     | 0.00E+0                                               | 1.07E+0                                             | 1.37E+0                                                        | 1.24E+1                                     |
| JD339      | 732103      | Cable broadcasting                                             | 有線放送                                                     | 1.93E+0                                                                     | 0.00E+0                                               | 1.02E+0                                             | 9.16E-1                                                        | 6.17E+0                                     |
| JD340      | 733101      | Information services                                           | 情報サービス                                                   | 1.67E+0                                                                     | 2.00E-3                                               | 9.57E-1                                             | 7.14E-1                                                        | 5.63E+0                                     |
| JD341      | 734101      | Internet based services                                        | インターネット附随サービス                                            | 2.06E+0                                                                     | 2.87E-2                                               | 1.17E+0                                             | 8.60E-1                                                        | 5.81E+0                                     |
| JD342      | 735101      | Image information production and distribution industry         | 映像情報制作・配給業                                               | 4.72E+0                                                                     | 8.91E-1                                               | 1.04E+0                                             | 2.79E+0                                                        | 1.92E+1                                     |
| JD343      | 735102      | Newspaper                                                      | 新聞                                                       | 9.42E+0                                                                     | 6.84E-3                                               | 6.00E+0                                             | 3.41E+0                                                        | 3.90E+0                                     |
| JD344      | 735103      | Publication                                                    | 出版                                                       | 6.61E+0                                                                     | 5.72E-3                                               | 4.77E+0                                             | 1.83E+0                                                        | 3.70E+0                                     |
| JD345      | 735104      | News syndicates and private detective agencies                 | ニュース供給・興信所                                               | 1.73E+0                                                                     | 1.19E-2                                               | 8.03E-1                                             | 9.11E-1                                                        | 1.11E+1                                     |
| JD346      | 811101      | Public administration (central) **                             | 公務(中央)★★                                                 | 3.01E+0                                                                     | 2.99E-1                                               | 1.04E+0                                             | 1.67E+0                                                        | 7.45E+0                                     |
| JD347      | 811201      | Public administration (local) **                               | 公務(地方)★★                                                 | 2.10E+0                                                                     | 5.22E-1                                               | 9.33E-1                                             | 6.48E-1                                                        | 3.63E+0                                     |
| JD348      | 821101      | School education (public) **                                   | 学校教育(国公立)★★                                              | 1.03E+0                                                                     | 1.47E-1                                               | 5.80E-1                                             | 2.99E-1                                                        | 3.48E+0                                     |
| JD349      | 821102      | School education (private) *                                   | 学校教育(私立)★                                                | 2.14E+0                                                                     | 3.74E-1                                               | 7.92E-1                                             | 7.92E-1                                                        | 4.04E+0                                     |
| JD350      | 821301      | Social education (public) **                                   | 社会教育(国公立)★★                                              | 3.50E+0                                                                     | 7.79E-1                                               | 1.74E+0                                             | 9.80E-1                                                        | 3.32E+0                                     |
| JD351      | 821302      | Social education (private, non-profit) *                       | 社会教育(非営利)★                                               | 5.44E+0                                                                     | 9.38E-1                                               | 2.55E+0                                             | 1.95E+0                                                        | 3.62E+0                                     |
| JD352      | 821303      | Other educational and training institutions (public) **        | その他の教育訓練機関(国公立)★★                                        | 4.68E+0                                                                     | 4.39E-1                                               | 2.16E+0                                             | 2.07E+0                                                        | 7.23E+0                                     |
| JD353      | 821304      | Other educational and training institutions (profit-making)    | その他の教育訓練機関(産業)                                           | 3.27E+0                                                                     | 1.06E+0                                               | 9.84E-1                                             | 1.23E+0                                                        | 5.00E+0                                     |

Table A9: Embodied global NOx intensities of Japanese goods and services based on producer price in 2005 [5/5]

| Sector no. | Sector code | Sector name<br>[Japanese domestic commodity]                                                | Sector name in Japanese<br>[Japanese domestic commodity] | Embodied global NO <sub>x</sub> intensities based on producer price in 2005 |                                                       |                                                     |                                                                |                                             |
|------------|-------------|---------------------------------------------------------------------------------------------|----------------------------------------------------------|-----------------------------------------------------------------------------|-------------------------------------------------------|-----------------------------------------------------|----------------------------------------------------------------|---------------------------------------------|
|            |             |                                                                                             |                                                          | Total                                                                       | (D) Direct emissions<br>in Japan during<br>production | (S) Induced<br>emissions in Japan<br>through supply | (F) Induced emissions<br>in foreign country's<br>supply chains | Coefficient of variance<br>of the intensity |
|            |             |                                                                                             |                                                          | kg/M-JPY                                                                    | kg/M-JPY                                              | kg/M-JPY                                            | kg/M-JPY                                                       | %                                           |
| JD354      | 822101      | Research institutes for natural science (public) **                                         | 自然科学研究機関(国公立)★★                                          | 5.59E+0                                                                     | 8.62E-1                                               | 2.73E+0                                             | 2.00E+0                                                        | 4.68E+0                                     |
| JD355      | 822102      | Research institutes for cultural and social science (public) **                             | 人文科学研究機関(国公立)★★                                          | 5.44E+0                                                                     | 1.81E+0                                               | 1.85E+0                                             | 1.79E+0                                                        | 4.10E+0                                     |
| JD356      | 822103      | Research institutes for natural sciences (private, non-profit) *                            | 自然科学研究機関(非営利)★                                           | 4.11E+0                                                                     | 3.98E-1                                               | 1.59E+0                                             | 2.12E+0                                                        | 7.38E+0                                     |
| JD357      | 822104      | Research institutes for cultural and social science (private, non-profit) *                 | 人文科学研究機関(非営利)★                                           | 2.40E+0                                                                     | 2.37E-1                                               | 1.14E+0                                             | 1.02E+0                                                        | 5.39E+0                                     |
| JD358      | 822105      | Research institutes for natural sciences (profit-making)                                    | 自然科学研究機関(産業)                                             | 7.41E+0                                                                     | 1.58E+0                                               | 3.20E+0                                             | 2.63E+0                                                        | 4.66E+0                                     |
| JD359      | 822106      | Research institutes for cultural and social science (profit-making)                         | 人文科学研究機関(産業)                                             | 2.12E+0                                                                     | 1.43E-2                                               | 1.15E+0                                             | 9.62E-1                                                        | 6.70E+0                                     |
| JD360      | 822201      | Research and development (intra-enterprise)                                                 | 企業内研究開発                                                  | 4.18E+0                                                                     | 5.73E-1                                               | 2.10E+0                                             | 1.51E+0                                                        | 3.76E+0                                     |
| JD361      | 831101      | Medical service (public)                                                                    | 医療(国公立)                                                  | 3.82E+0                                                                     | 5.28E-1                                               | 1.54E+0                                             | 1.75E+0                                                        | 4.96E+0                                     |
| JD362      | 831102      | Medical service (non-profit foundations, etc.)                                              | 医療(公益法人等)                                                | 3.31E+0                                                                     | 6.19E-1                                               | 1.26E+0                                             | 1.44E+0                                                        | 4.78E+0                                     |
| JD363      | 831103      | Medical service (medical corporations, etc.)                                                | 医療(医療法人等)                                                | 3.23E+0                                                                     | 3.42E-1                                               | 1.27E+0                                             | 1.63E+0                                                        | 5.66E+0                                     |
| JD364      | 831201      | Health and hygiene (public) **                                                              | 保健衛生(国公立)★★                                              | 2.85E+0                                                                     | 8.51E-1                                               | 1.09E+0                                             | 9.12E-1                                                        | 3.17E+0                                     |
| JD365      | 831202      | Health and hygiene (profit-making)                                                          | 保健衛生(産業)                                                 | 3.52E+0                                                                     | 8.55E-1                                               | 1.50E+0                                             | 1.17E+0                                                        | 3.33E+0                                     |
| JD366      | 831301      | Social insurance (public) **                                                                | 社会保険事業(国公立)★★                                            | 2.14E+0                                                                     | 0.00E+0                                               | 1.39E+0                                             | 7.49E-1                                                        | 3.82E+0                                     |
| JD367      | 831302      | Social insurance (private, non-profit) *                                                    | 社会保険事業(非営利)★                                             | 2.32E+0                                                                     | 0.00E+0                                               | 1.61E+0                                             | 7.08E-1                                                        | 3.49E+0                                     |
| JD368      | 831303      | Social welfare (public) **                                                                  | 社会福祉(国公立)★★                                              | 3.37E+0                                                                     | 9.35E-1                                               | 1.35E+0                                             | 1.09E+0                                                        | 3.01E+0                                     |
| JD369      | 831304      | Social welfare (private, non-profit) *                                                      | 社会福祉(非営利)★                                               | 3.11E+0                                                                     | 5.13E-1                                               | 1.41E+0                                             | 1.19E+0                                                        | 3.50E+0                                     |
| JD370      | 831305      | Social welfare (profit-making)                                                              | 社会福祉(産業)                                                 | 3.76E+0                                                                     | 1.11E+0                                               | 1.44E+0                                             | 1.21E+0                                                        | 2.99E+0                                     |
| JD371      | 831401      | Nursing care (In-home)                                                                      | 介護(居宅)                                                   | 2.82E+0                                                                     | 4.51E-1                                               | 1.33E+0                                             | 1.04E+0                                                        | 3.45E+0                                     |
| JD372      | 831402      | Nursing care (In-facility)                                                                  | 介護(施設)                                                   | 3.32E+0                                                                     | 5.70E-1                                               | 1.54E+0                                             | 1.21E+0                                                        | 3.46E+0                                     |
| JD373      | 841101      | Private non-profit institutions serving enterprises                                         | 対企業民間非営利団体                                               | 3.90E+0                                                                     | 1.20E+0                                               | 1.22E+0                                             | 1.48E+0                                                        | 4.07E+0                                     |
| JD374      | 841102      | Private non-profit institutions serving households, n.e.c. *                                | 対家計民間非営利団体(除別掲)★                                         | 2.84E+0                                                                     | 9.87E-1                                               | 9.58E-1                                             | 8.96E-1                                                        | 3.76E+0                                     |
| JD375      | 851101      | Advertising services                                                                        | 広告                                                       | 3.53E+0                                                                     | 5.76E-3                                               | 2.02E+0                                             | 1.50E+0                                                        | 6.42E+0                                     |
| JD376      | 851201      | Goods rental and leasing (except car rental)                                                | 物品賃貸業(除貸自動車)                                             | 1.62E+0                                                                     | 3.07E-2                                               | 5.86E-1                                             | 1.01E+0                                                        | 6.46E+0                                     |
| JD377      | 851301      | Car rental and leasing                                                                      | 貸自動車業                                                    | 1.80E+0                                                                     | 2.45E-1                                               | 5.63E-1                                             | 9.95E-1                                                        | 9.10E+0                                     |
| JD378      | 851410      | Repair of motor vehicles                                                                    | 自動車修理                                                    | 5.14E+0                                                                     | 1.17E-1                                               | 2.05E+0                                             | 2.98E+0                                                        | 5.67E+0                                     |
| JD379      | 851510      | Repair of machine                                                                           | 機械修理                                                     | 6.46E+0                                                                     | 5.39E-2                                               | 2.07E+0                                             | 4.34E+0                                                        | 6.48E+0                                     |
| JD380      | 851901      | Building maintenance services                                                               | 建物サービス                                                   | 1.61E+0                                                                     | 3.51E-1                                               | 6.10E-1                                             | 6.50E-1                                                        | 5.17E+0                                     |
| JD381      | 851902      | Judicial, financial and accounting services                                                 | 法務・財務・会計サービス                                             | 1.61E+0                                                                     | 7.49E-1                                               | 4.49E-1                                             | 4.10E-1                                                        | 3.67E+0                                     |
| JD382      | 851903      | Civil engineering and construction services                                                 | 土木建築サービス                                                 | 3.42E+0                                                                     | 1.27E+0                                               | 1.28E+0                                             | 8.69E-1                                                        | 2.96E+0                                     |
| JD383      | 851904      | Worker dispatching services                                                                 | 労働者派遣サービス                                                | 2.65E-1                                                                     | 3.57E-2                                               | 1.29E-1                                             | 9.99E-2                                                        | 5.21E+0                                     |
| JD384      | 851909      | Other business services                                                                     | その他の対事業所サービス                                             | 1.30E+0                                                                     | 2.21E-1                                               | 5.56E-1                                             | 5.20E-1                                                        | 5.20E+0                                     |
| JD385      | 861101      | Movie theaters                                                                              | 映画館                                                      | 4.79E+0                                                                     | 9.86E-2                                               | 2.45E+0                                             | 2.24E+0                                                        | 1.35E+1                                     |
| JD386      | 861102      | Performances (except otherwise classified), theatrical companies                            | 興行場(除別掲)・興行団                                             | 2.34E+0                                                                     | 1.09E-1                                               | 8.48E-1                                             | 1.39E+0                                                        | 9.74E+0                                     |
| JD387      | 861103      | Amusement and recreation facilities                                                         | 遊戯場                                                      | 5.25E+0                                                                     | 1.86E+0                                               | 2.01E+0                                             | 1.38E+0                                                        | 2.81E+0                                     |
| JD388      | 861104      | Stadiums and companies of bicycle, horse, motorcar and motorboat races                      | 競輪・競馬等の競走場・競技団                                           | 2.54E+0                                                                     | 4.01E-1                                               | 1.12E+0                                             | 1.03E+0                                                        | 4.72E+0                                     |
| JD389      | 861105      | Sport facility service, public gardens and amusement parks                                  | スポーツ施設提供業・公園・遊園地                                         | 2.93E+0                                                                     | 5.62E-1                                               | 1.16E+0                                             | 1.20E+0                                                        | 5.04E+0                                     |
| JD390      | 861109      | Other amusement and recreation services                                                     | その他の娯楽                                                   | 2.98E+0                                                                     | 7.41E-1                                               | 1.30E+0                                             | 9.37E-1                                                        | 3.93E+0                                     |
| JD391      | 861201      | General eating and drinking places (except coffee shops)                                    | 一般飲食店(除喫茶店)                                              | 6.36E+0                                                                     | 1.94E-1                                               | 2.53E+0                                             | 3.64E+0                                                        | 5.29E+0                                     |
| JD392      | 861202      | Coffee shops                                                                                | 喫茶店                                                      | 5.29E+0                                                                     | 2.64E-1                                               | 2.09E+0                                             | 2.94E+0                                                        | 5.05E+0                                     |
| JD393      | 861203      | Eating and drinking places for pleasures                                                    | 遊興飲食店                                                    | 4.29E+0                                                                     | 2.18E-1                                               | 1.70E+0                                             | 2.37E+0                                                        | 5.30E+0                                     |
| JD394      | 861301      | Hotels                                                                                      | 宿泊業                                                      | 6.21E+0                                                                     | 5.19E-1                                               | 2.68E+0                                             | 3.01E+0                                                        | 5.91E+0                                     |
| JD395      | 861401      | Cleaning                                                                                    | 洗濯業                                                      | 6.97E+0                                                                     | 4.40E+0                                               | 1.61E+0                                             | 9.58E-1                                                        | 1.64E+0                                     |
| JD396      | 861402      | Barber shops                                                                                | 理容業                                                      | 1.37E+0                                                                     | 0.00E+0                                               | 6.38E-1                                             | 7.32E-1                                                        | 5.94E+0                                     |
| JD397      | 861403      | Beauty shops                                                                                | 美容業                                                      | 1.57E+0                                                                     | 0.00E+0                                               | 7.35E-1                                             | 8.38E-1                                                        | 5.30E+0                                     |
| JD398      | 861404      | Public baths                                                                                | 浴場業                                                      | 3.96E+0                                                                     | 2.28E-1                                               | 2.24E+0                                             | 1.49E+0                                                        | 4.95E+0                                     |
| JD399      | 861409      | Other cleaning, barber shops, beauty shops and public baths                                 | その他の洗濯・理容・美容・浴場業                                         | 2.33E+0                                                                     | 0.00E+0                                               | 1.12E+0                                             | 1.20E+0                                                        | 5.56E+0                                     |
| JD400      | 861901      | Photographic studios                                                                        | 写真業                                                      | 2.75E+0                                                                     | 3.42E-1                                               | 1.10E+0                                             | 1.31E+0                                                        | 5.11E+0                                     |
| JD401      | 861902      | Ceremonial occasions                                                                        | 冠婚葬祭業                                                    | 5.25E+0                                                                     | 1.78E+0                                               | 1.92E+0                                             | 1.56E+0                                                        | 3.08E+0                                     |
| JD402      | 861903      | Miscellaneous repairs, n.e.c.                                                               | 各種修理業(除別掲)                                               | 4.12E+0                                                                     | 1.39E+0                                               | 1.30E+0                                             | 1.43E+0                                                        | 3.49E+0                                     |
| JD403      | 861904      | Supplementary tutorial schools, instruction services for arts, culture and technical skills | 個人教授業                                                    | 2.14E+0                                                                     | 4.77E-1                                               | 1.00E+0                                             | 6.62E-1                                                        | 3.72E+0                                     |
| JD404      | 861909      | Other personal services                                                                     | その他の対個人サービス                                              | 2.55E+0                                                                     | 9.26E-1                                               | 7.51E-1                                             | 8.74E-1                                                        | 3.59E+0                                     |
| JD405      | 890000      | Office supplies                                                                             | 事務用品                                                     | 1.32E+1                                                                     | 0.00E+0                                               | 7.29E+0                                             | 5.89E+0                                                        | 4.18E+0                                     |
| JD406      | 900000      | Activities not elsewhere classified                                                         | 分類不明                                                     | 4.96E+0                                                                     | 4.08E-1                                               | 2.40E+0                                             | 2.14E+0                                                        | 4.79E+0                                     |



Table A10: Embodied global SO<sub>x</sub> intensities of Japanese goods and services based on producer price in 2005 [1/5]

| Sector no. | Sector code | Sector name<br>[Japanese domestic commodity]                                 | Sector name in Japanese<br>[Japanese domestic commodity] | Embodied global SO <sub>x</sub> intensities based on producer price in 2005 |                                                       |                                                     |                                                                |                                             |
|------------|-------------|------------------------------------------------------------------------------|----------------------------------------------------------|-----------------------------------------------------------------------------|-------------------------------------------------------|-----------------------------------------------------|----------------------------------------------------------------|---------------------------------------------|
|            |             |                                                                              |                                                          | Total                                                                       | (D) Direct emissions<br>in Japan during<br>production | (S) Induced<br>emissions in Japan<br>through supply | (F) Induced emissions<br>in foreign country's<br>supply chains | Coefficient of variance<br>of the intensity |
|            |             |                                                                              |                                                          | kg/M-JPY                                                                    | kg/M-JPY                                              | kg/M-JPY                                            | kg/M-JPY                                                       | %                                           |
| JD1        | 011101      | Rice                                                                         | 米                                                        | 4.39E+0                                                                     | 5.26E-2                                               | 1.18E+0                                             | 3.15E+0                                                        | 1.05E+1                                     |
| JD2        | 011102      | Wheat, barley and the like                                                   | 麦類                                                       | 6.69E+0                                                                     | 3.93E-2                                               | 1.70E+0                                             | 4.95E+0                                                        | 1.05E+1                                     |
| JD3        | 011201      | Potatoes and sweet potatoes                                                  | いも類                                                      | 4.80E+0                                                                     | 3.80E-2                                               | 1.23E+0                                             | 3.52E+0                                                        | 1.06E+1                                     |
| JD4        | 011202      | Pulses                                                                       | 豆類                                                       | 4.74E+0                                                                     | 3.35E-2                                               | 1.30E+0                                             | 3.41E+0                                                        | 1.05E+1                                     |
| JD5        | 011301      | Vegetables                                                                   | 野菜                                                       | 1.06E+1                                                                     | 6.28E+0                                               | 1.28E+0                                             | 3.03E+0                                                        | 4.52E+0                                     |
| JD6        | 011401      | Fruits                                                                       | 果実                                                       | 8.40E+0                                                                     | 4.18E+0                                               | 1.17E+0                                             | 3.05E+0                                                        | 5.33E+0                                     |
| JD7        | 011501      | Sugar crops                                                                  | 砂糖原料作物                                                   | 6.33E+0                                                                     | 6.78E-2                                               | 1.59E+0                                             | 4.67E+0                                                        | 1.04E+1                                     |
| JD8        | 011502      | Crops for beverages                                                          | 飲料用作物                                                    | 6.36E+0                                                                     | 3.27E-3                                               | 1.62E+0                                             | 4.73E+0                                                        | 1.05E+1                                     |
| JD9        | 011509      | Other edible crops                                                           | その他の食用耕種作物                                               | 5.25E+0                                                                     | 1.24E-1                                               | 1.42E+0                                             | 3.70E+0                                                        | 1.01E+1                                     |
| JD10       | 011601      | Crops for feed and forage                                                    | 飼料作物                                                     | 5.04E+0                                                                     | 3.55E-2                                               | 1.05E+0                                             | 3.96E+0                                                        | 1.30E+1                                     |
| JD11       | 011602      | Seeds and seedlings                                                          | 種苗                                                       | 5.23E+0                                                                     | 1.32E-1                                               | 8.80E-1                                             | 4.22E+0                                                        | 3.79E+1                                     |
| JD12       | 011603      | Flowers and plants                                                           | 花き・花木類                                                   | 2.98E+1                                                                     | 2.40E+1                                               | 1.67E+0                                             | 4.15E+0                                                        | 2.83E+0                                     |
| JD13       | 011609      | Other inedible crops                                                         | その他の非食用耕種作物                                              | 3.10E+0                                                                     | 1.42E-1                                               | 7.41E-1                                             | 2.22E+0                                                        | 1.05E+1                                     |
| JD14       | 012101      | Dairy cattle farming                                                         | 酪農                                                       | 4.79E+0                                                                     | 4.86E-2                                               | 1.27E+0                                             | 3.47E+0                                                        | 1.28E+1                                     |
| JD15       | 012102      | Hen eggs                                                                     | 鶏卵                                                       | 7.13E+0                                                                     | 4.58E-2                                               | 2.29E+0                                             | 4.80E+0                                                        | 1.15E+1                                     |
| JD16       | 012103      | Fowls and broilers                                                           | 肉鶏                                                       | 8.13E+0                                                                     | 1.14E-1                                               | 2.62E+0                                             | 5.39E+0                                                        | 1.11E+1                                     |
| JD17       | 012104      | Hogs                                                                         | 豚                                                        | 6.86E+0                                                                     | 2.55E-2                                               | 2.17E+0                                             | 4.66E+0                                                        | 1.17E+1                                     |
| JD18       | 012105      | Beef cattle                                                                  | 肉用牛                                                      | 6.11E+0                                                                     | 5.08E-3                                               | 1.86E+0                                             | 4.24E+0                                                        | 1.17E+1                                     |
| JD19       | 012109      | Other livestock                                                              | その他の畜産                                                   | 6.75E+0                                                                     | 5.67E-2                                               | 1.46E+0                                             | 5.23E+0                                                        | 1.13E+1                                     |
| JD20       | 013101      | Veterinary service                                                           | 獣医学                                                      | 2.86E+0                                                                     | 0.00E+0                                               | 5.65E-1                                             | 2.30E+0                                                        | 2.01E+1                                     |
| JD21       | 013102      | Agricultural services (except veterinary service)                            | 農業サービス (除獣医学)                                            | 4.20E+0                                                                     | 3.05E-1                                               | 1.28E+0                                             | 2.61E+0                                                        | 9.55E+0                                     |
| JD22       | 021101      | Silviculture                                                                 | 育林                                                       | 6.30E-1                                                                     | 1.44E-2                                               | 1.52E-1                                             | 4.64E-1                                                        | 1.31E+1                                     |
| JD23       | 021201      | Logs                                                                         | 素材                                                       | 2.42E+0                                                                     | 9.66E-2                                               | 5.75E-1                                             | 1.75E+0                                                        | 1.35E+1                                     |
| JD24       | 021301      | Special forest products (inc. hunting)                                       | 特用林産物(含狩猟業)                                              | 1.03E+1                                                                     | 4.90E+0                                               | 1.75E+0                                             | 3.60E+0                                                        | 6.63E+0                                     |
| JD25       | 031101      | Marine fisheries                                                             | 海面漁業                                                     | 1.15E+2                                                                     | 1.09E+2                                               | 2.47E+0                                             | 4.14E+0                                                        | 7.66E-1                                     |
| JD26       | 031104      | Marine culture                                                               | 海面養殖業                                                    | 4.58E+1                                                                     | 2.79E+1                                               | 1.34E+1                                             | 4.54E+0                                                        | 1.58E+0                                     |
| JD27       | 0312001     | Inland water fisheries and culture                                           | 内水面漁業・養殖業                                                | 4.06E+1                                                                     | 3.00E+1                                               | 4.83E+0                                             | 5.76E+0                                                        | 3.30E+0                                     |
| JD28       | 061101      | Metallic ores                                                                | 金属鉱物                                                     | 9.77E+0                                                                     | 7.39E-1                                               | 5.64E+0                                             | 3.40E+0                                                        | 6.07E+0                                     |
| JD29       | 062101      | Materials for ceramics                                                       | 窯業原料鉱物                                                   | 6.68E+0                                                                     | 8.10E-1                                               | 2.22E+0                                             | 3.65E+0                                                        | 1.15E+1                                     |
| JD30       | 062201      | Gravel and quarrying                                                         | 砂利・採石                                                    | 6.33E+0                                                                     | 3.98E-1                                               | 1.97E+0                                             | 3.97E+0                                                        | 1.41E+1                                     |
| JD31       | 062202      | Crushed stones                                                               | 砕石                                                       | 6.60E+0                                                                     | 4.99E-1                                               | 1.99E+0                                             | 4.11E+0                                                        | 1.28E+1                                     |
| JD32       | 062909      | Other non-metallic ores                                                      | その他の非金属鉱物                                                | 1.16E+1                                                                     | 3.93E+0                                               | 2.54E+0                                             | 5.13E+0                                                        | 9.25E+0                                     |
| JD33       | 071101      | Coal mining, crude petroleum and natural gas                                 | 石炭・原油・天然ガス                                               | 6.30E+0                                                                     | 1.91E-1                                               | 3.85E+0                                             | 2.26E+0                                                        | 5.75E+0                                     |
| JD34       | 0711011     | Coal mining                                                                  | 石炭                                                       | 6.30E+0                                                                     | 0.00E+0                                               | 4.04E+0                                             | 2.26E+0                                                        | 5.75E+0                                     |
| JD35       | 0711012     | Crude petroleum                                                              | 原油                                                       | 6.30E+0                                                                     | 0.00E+0                                               | 4.04E+0                                             | 2.26E+0                                                        | 5.75E+0                                     |
| JD36       | 0711013     | Natural gas                                                                  | 天然ガス                                                     | 6.30E+0                                                                     | 0.00E+0                                               | 4.04E+0                                             | 2.26E+0                                                        | 5.75E+0                                     |
| JD37       | 111101      | Slaughtering and meat processing                                             | と畜(含肉鶏処理)                                                | 6.04E+0                                                                     | 2.23E-3                                               | 1.90E+0                                             | 4.14E+0                                                        | 1.17E+1                                     |
| JD38       | 111201      | Processed meat products                                                      | 肉加工品                                                     | 9.18E+0                                                                     | 7.82E-1                                               | 9.54E-1                                             | 7.44E+0                                                        | 1.50E+1                                     |
| JD39       | 111202      | Bottled or canned meat products                                              | 畜産びん・かん詰                                                 | 7.01E+0                                                                     | 1.20E+0                                               | 1.59E+0                                             | 4.21E+0                                                        | 1.03E+1                                     |
| JD40       | 111203      | Dairy farm products                                                          | 酪農品                                                      | 7.59E+0                                                                     | 1.94E+0                                               | 1.86E+0                                             | 3.80E+0                                                        | 9.00E+0                                     |
| JD41       | 111301      | Frozen fish and shellfish                                                    | 冷凍魚介類                                                    | 5.48E+1                                                                     | 7.60E-1                                               | 5.05E+1                                             | 3.56E+0                                                        | 1.08E+0                                     |
| JD42       | 111302      | Salted, dried or smoked seafood                                              | 塩・干・くん製品                                                 | 3.22E+1                                                                     | 1.74E+0                                               | 2.25E+1                                             | 7.98E+0                                                        | 4.71E+0                                     |
| JD43       | 111303      | Bottled or canned seafood                                                    | 水産びん・かん詰                                                 | 2.45E+1                                                                     | 3.74E+0                                               | 1.50E+1                                             | 5.68E+0                                                        | 3.91E+0                                     |
| JD44       | 111304      | Fish paste                                                                   | ねり製品                                                     | 1.56E+1                                                                     | 1.37E+0                                               | 7.20E+0                                             | 6.99E+0                                                        | 7.79E+0                                     |
| JD45       | 111309      | Other processed seafood                                                      | その他の水産食品                                                 | 2.21E+1                                                                     | 6.39E-1                                               | 1.59E+1                                             | 5.59E+0                                                        | 4.30E+0                                     |
| JD46       | 111401      | Grain milling                                                                | 精穀                                                       | 4.03E+0                                                                     | 1.13E-1                                               | 1.22E+0                                             | 2.70E+0                                                        | 1.04E+1                                     |
| JD47       | 111402      | Flour and other grain milled products                                        | 製粉                                                       | 9.01E+0                                                                     | 3.11E+0                                               | 1.08E+0                                             | 4.82E+0                                                        | 1.19E+1                                     |
| JD48       | 111501      | Noodles                                                                      | めん類                                                      | 1.07E+1                                                                     | 3.49E+0                                               | 2.25E+0                                             | 4.93E+0                                                        | 7.08E+0                                     |
| JD49       | 111502      | Bread                                                                        | パン類                                                      | 6.54E+0                                                                     | 4.61E-1                                               | 1.74E+0                                             | 4.34E+0                                                        | 1.06E+1                                     |
| JD50       | 111503      | Confectionery                                                                | 菓子類                                                      | 7.94E+0                                                                     | 1.06E+0                                               | 1.63E+0                                             | 5.24E+0                                                        | 1.23E+1                                     |
| JD51       | 111601      | Bottled or canned vegetables and fruits                                      | 農産びん・かん詰                                                 | 1.25E+1                                                                     | 2.68E+0                                               | 2.47E+0                                             | 7.33E+0                                                        | 8.33E+0                                     |
| JD52       | 111602      | Preserved agricultural foodstuffs (other than bottled or canned)             | 農産保存食料品(除びん・かん詰)                                         | 8.36E+0                                                                     | 9.93E-1                                               | 2.55E+0                                             | 4.83E+0                                                        | 8.26E+0                                     |
| JD53       | 111701      | Sugar                                                                        | 砂糖                                                       | 1.42E+1                                                                     | 4.08E+0                                               | 2.42E+0                                             | 7.67E+0                                                        | 1.59E+1                                     |
| JD54       | 111702      | Starch                                                                       | でん粉                                                      | 9.83E+0                                                                     | 4.08E+0                                               | 1.20E+0                                             | 4.55E+0                                                        | 9.51E+0                                     |
| JD55       | 111703      | Dextrose, syrup and isomerized sugar                                         | ぶどう糖・水あめ・異性化糖                                            | 1.57E+1                                                                     | 4.91E+0                                               | 5.70E+0                                             | 5.05E+0                                                        | 5.31E+0                                     |
| JD56       | 111704      | Vegetable oils and meal                                                      | 植物油脂                                                     | 1.13E+1                                                                     | 1.68E+0                                               | 1.45E+0                                             | 8.19E+0                                                        | 1.14E+1                                     |
| JD57       | 111705      | Animal oils and fats                                                         | 動物油脂                                                     | 1.63E+1                                                                     | 6.18E+0                                               | 4.77E+0                                             | 5.31E+0                                                        | 5.36E+0                                     |
| JD58       | 111706      | Condiments and seasonings                                                    | 調味料                                                      | 9.11E+0                                                                     | 1.31E+0                                               | 2.31E+0                                             | 5.49E+0                                                        | 9.56E+0                                     |
| JD59       | 111901      | Prepared frozen foods                                                        | 冷凍調理食品                                                   | 1.06E+1                                                                     | 2.34E+0                                               | 2.40E+0                                             | 5.85E+0                                                        | 8.31E+0                                     |
| JD60       | 111902      | Retort foods                                                                 | レトルト食品                                                   | 1.41E+1                                                                     | 3.30E+0                                               | 2.01E+0                                             | 8.81E+0                                                        | 8.91E+0                                     |
| JD61       | 111903      | Dishes, sushi and lunch boxes                                                | そう菜・すし・弁当                                                | 9.33E+0                                                                     | 7.85E-1                                               | 2.71E+0                                             | 5.84E+0                                                        | 9.13E+0                                     |
| JD62       | 111904      | School lunch (public) **                                                     | 学校給食(国公立)★                                               | 5.80E+0                                                                     | 1.38E-1                                               | 2.62E+0                                             | 3.04E+0                                                        | 8.25E+0                                     |
| JD63       | 111905      | School lunch (private) *                                                     | 学校給食(私立)★                                                | 6.08E+0                                                                     | 0.00E+0                                               | 2.78E+0                                             | 3.30E+0                                                        | 8.40E+0                                     |
| JD64       | 111909      | Other foods                                                                  | その他の食料品                                                  | 9.32E+0                                                                     | 3.43E+0                                               | 1.58E+0                                             | 4.31E+0                                                        | 6.88E+0                                     |
| JD65       | 112101      | Refined sake                                                                 | 清酒                                                       | 3.78E+0                                                                     | 7.01E-1                                               | 1.06E+0                                             | 2.03E+0                                                        | 8.57E+0                                     |
| JD66       | 112102      | Beer                                                                         | ビール                                                      | 3.50E+0                                                                     | 3.96E-1                                               | 8.42E-1                                             | 2.27E+0                                                        | 1.08E+1                                     |
| JD67       | 112103      | Whiskey and brandy                                                           | ウィスキー類                                                   | 4.42E+0                                                                     | 1.18E+0                                               | 9.08E-1                                             | 2.33E+0                                                        | 9.41E+0                                     |
| JD68       | 112109      | Other liquors                                                                | その他の酒類                                                   | 5.52E+0                                                                     | 8.65E-1                                               | 1.19E+0                                             | 3.46E+0                                                        | 1.06E+1                                     |
| JD69       | 112901      | Tea and roasted coffee                                                       | 茶・コーヒー                                                   | 8.23E+0                                                                     | 2.74E-1                                               | 1.22E+0                                             | 6.73E+0                                                        | 1.16E+1                                     |
| JD70       | 112902      | Soft drinks                                                                  | 清涼飲料                                                     | 7.46E+0                                                                     | 1.06E+0                                               | 1.44E+0                                             | 4.96E+0                                                        | 1.00E+1                                     |
| JD71       | 112903      | Manufactured ice                                                             | 製氷                                                       | 4.96E+0                                                                     | 7.86E-2                                               | 2.37E+0                                             | 2.52E+0                                                        | 7.92E+0                                     |
| JD72       | 113101      | Animal feed                                                                  | 飼料                                                       | 1.04E+1                                                                     | 1.37E+0                                               | 1.51E+0                                             | 7.52E+0                                                        | 1.32E+1                                     |
| JD73       | 113102      | Organic fertilizers, n.e.c.                                                  | 有機質肥料(除別掲)                                               | 7.99E+0                                                                     | 6.58E-1                                               | 1.98E+0                                             | 5.35E+0                                                        | 1.10E+1                                     |
| JD74       | 114101      | Tobacco                                                                      | たばこ                                                      | 1.55E+0                                                                     | 8.90E-2                                               | 3.38E-1                                             | 1.12E+0                                                        | 1.30E+1                                     |
| JD75       | 151101      | Fiber yarns                                                                  | 紡績糸                                                      | 1.91E+1                                                                     | 1.13E+0                                               | 2.61E+0                                             | 1.53E+1                                                        | 1.94E+1                                     |
| JD76       | 151201      | Cotton and staple fiber fabrics (inc. fabrics of synthetic spun fibers)      | 綿・スフ織物(含合繊短繊維織物)                                         | 2.57E+1                                                                     | 1.48E+0                                               | 3.79E+0                                             | 2.04E+1                                                        | 1.12E+1                                     |
| JD77       | 151202      | Silk and artificial silk fabrics (inc. fabrics of synthetic filament fibers) | 絹・人絹織物(含合繊長繊維織物)                                         | 1.59E+1                                                                     | 9.32E-1                                               | 5.03E+0                                             | 9.90E+0                                                        | 1.16E+1                                     |
| JD78       | 151203      | Woolen fabrics, hemp fabrics and other fabrics                               | 毛織物・麻織物・その他の織物                                           | 1.82E+1                                                                     | 2.23E-1                                               | 4.32E+0                                             | 1.36E+1                                                        | 1.13E+1                                     |
| JD79       | 151301      | Knitting fabrics                                                             | ニット生地                                                    | 1.93E+1                                                                     | 1.53E-1                                               | 2.80E+0                                             | 1.63E+1                                                        | 1.66E+1                                     |
| JD80       | 151401      | Yarn and fabric dyeing and finishing (processing on commission only)         | 染色整理                                                     | 1.81E+1                                                                     | 4.37E+0                                               | 2.96E+0                                             | 1.08E+1                                                        | 9.57E+0                                     |
| JD81       | 151901      | Ropes and nets                                                               | 綱・網                                                      | 1.16E+1                                                                     | 4.26E-1                                               | 4.69E+0                                             | 6.52E+0                                                        | 1.11E+1                                     |
| JD82       | 151902      | Carpets and floor mats                                                       | じゅうたん・床敷物                                                | 1.49E+1                                                                     | 2.03E-1                                               | 4.27E+0                                             | 1.04E+1                                                        | 1.14E+1                                     |
| JD83       | 151903      | Fabricated textiles for medical use                                          | 繊維製衛生材料                                                  | 8.19E+0                                                                     | 6.75E-2                                               | 2.93E+0                                             | 5.19E+0                                                        | 1.15E+1                                     |
| JD84       | 151909      | Other fabricated textile products                                            | その他の繊維工業製品                                               | 1.24E+1                                                                     | 5.76E-1                                               | 3.48E+0                                             | 8.31E+0                                                        | 1.14E+1                                     |
| JD85       | 152101      | Woven fabric apparel                                                         | 織物製衣服                                                    | 1.35E+1                                                                     | 4.53E-2                                               | 1.89E+0                                             | 1.15E+1                                                        | 1.27E+1                                     |
| JD86       | 152102      | Knitted apparel                                                              | ニット製衣服                                                   | 1.15E+1                                                                     | 2.18E-1                                               | 3.42E+0                                             | 7.83E+0                                                        | 1.22E+1                                     |
| JD87       | 152209      | Other wearing apparel and clothing accessories                               | その他の衣服・身の回り品                                             | 1.32E+1                                                                     | 1.48E+0                                               | 2.36E+0                                             | 9.33E+0                                                        | 1.01E+1                                     |
| JD88       | 152901      | Bedding                                                                      | 寝具                                                       | 1.00E+1                                                                     | 9.58E-2                                               | 1.56E+0                                             | 8.36E+0                                                        | 1.28E+1                                     |
| JD89       | 152909      | Other ready-made textile products                                            | その他の繊維既製品                                                | 1.20E+1                                                                     | 2.32E-1                                               | 2.23E+0                                             | 9.57E+0                                                        | 1.18E+1                                     |
| JD90       | 161101      | Timber                                                                       | 製材                                                       | 8.86E+0                                                                     | 5.82E-2                                               | 6.51E-1                                             | 8.15E+0                                                        | 1.85E+1                                     |
| JD91       | 161102      | Plywood                                                                      | 合板                                                       | 1.06E+1                                                                     | 2.83E-1                                               | 1.55E+0                                             | 8.74E+0                                                        | 1.77E+1                                     |
| JD92       | 161103      | Wooden chips                                                                 | 木材チップ                                                    | 3.62E+0                                                                     | 3.13E-2                                               | 8.86E-1                                             | 2.70E+0                                                        | 1.24E+1                                     |
| JD93       | 161909      | Other wooden products                                                        | その他の木製品                                                  | 6.95E+0                                                                     | 1.27E-1                                               | 1.20E+0                                             | 5.63E+0                                                        | 1.68E+1                                     |

Table A10: Embodied global SO<sub>x</sub> intensities of Japanese goods and services based on producer price in 2005 [2/5]

| Sector no. | Sector code | Sector name<br>[Japanese domestic commodity]                | Sector name in Japanese<br>[Japanese domestic commodity] | Embodied global SO <sub>x</sub> intensities based on producer price in 2005 |                                                       |                                                     |                                                                |                                             |
|------------|-------------|-------------------------------------------------------------|----------------------------------------------------------|-----------------------------------------------------------------------------|-------------------------------------------------------|-----------------------------------------------------|----------------------------------------------------------------|---------------------------------------------|
|            |             |                                                             |                                                          | Total                                                                       | (D) Direct emissions<br>in Japan during<br>production | (S) Induced<br>emissions in Japan<br>through supply | (F) Induced emissions<br>in foreign country's<br>supply chains | Coefficient of variance<br>of the intensity |
|            |             |                                                             |                                                          | kg/M-JPY                                                                    | kg/M-JPY                                              | kg/M-JPY                                            | kg/M-JPY                                                       | %                                           |
| JD94       | 171101      | Wooden furniture and fixtures                               | 木製家具・装備品                                                 | 1.02E+1                                                                     | 3.15E-1                                               | 1.23E+0                                             | 8.66E+0                                                        | 1.41E+1                                     |
| JD95       | 171102      | Wooden fixtures                                             | 木製建具                                                     | 7.51E+0                                                                     | 3.04E-1                                               | 1.55E+0                                             | 5.65E+0                                                        | 1.38E+1                                     |
| JD96       | 171103      | Metallic furniture and fixture                              | 金属製家具・装備品                                                | 1.08E+1                                                                     | 2.29E-1                                               | 1.58E+0                                             | 8.95E+0                                                        | 1.23E+1                                     |
| JD97       | 181101      | Pulp                                                        | パルプ                                                      | 2.73E+1                                                                     | 1.46E+0                                               | 8.58E+0                                             | 1.73E+1                                                        | 1.41E+1                                     |
| JD98       | 181201      | Paper                                                       | 洋紙・和紙                                                    | 3.64E+1                                                                     | 1.76E+1                                               | 1.02E+1                                             | 8.57E+0                                                        | 4.27E+0                                     |
| JD99       | 181202      | Paperboard                                                  | 板紙                                                       | 2.79E+1                                                                     | 1.04E+1                                               | 9.07E+0                                             | 8.38E+0                                                        | 5.38E+0                                     |
| JD100      | 181301      | Corrugated cardboard                                        | 段ボール                                                     | 1.58E+1                                                                     | 4.97E-1                                               | 9.99E+0                                             | 5.28E+0                                                        | 5.91E+0                                     |
| JD101      | 181302      | Coated paper and building<br>(construction) paper           | 塗工紙・建設用加工紙                                               | 1.23E+1                                                                     | 4.10E-1                                               | 7.11E+0                                             | 4.78E+0                                                        | 6.25E+0                                     |
| JD102      | 182101      | Corrugated card board boxes                                 | 段ボール箱                                                    | 7.53E+0                                                                     | 2.39E-1                                               | 4.52E+0                                             | 2.77E+0                                                        | 6.55E+0                                     |
| JD103      | 182109      | Other paper containers                                      | その他の紙製容器                                                 | 1.10E+1                                                                     | 1.45E-1                                               | 4.88E+0                                             | 5.99E+0                                                        | 1.15E+1                                     |
| JD104      | 182901      | Paper textile for medical use                               | 紙製衛生材料・用品                                                | 1.12E+1                                                                     | 5.36E-1                                               | 4.76E+0                                             | 5.91E+0                                                        | 8.69E+0                                     |
| JD105      | 182909      | Other pulp, paper and processed paper<br>products           | その他のパルプ・紙・紙加工品                                           | 1.05E+1                                                                     | 1.00E+0                                               | 5.42E+0                                             | 4.05E+0                                                        | 6.17E+0                                     |
| JD106      | 191101      | Printing, plate making and book binding                     | 印刷・製版・製本                                                 | 7.29E+0                                                                     | 4.49E-2                                               | 3.65E+0                                             | 3.59E+0                                                        | 7.58E+0                                     |
| JD107      | 201101      | Chemical fertilizer                                         | 化学肥料                                                     | 2.85E+1                                                                     | 4.81E+0                                               | 3.22E+0                                             | 2.05E+1                                                        | 9.58E+0                                     |
| JD108      | 202101      | Industrial soda chemicals                                   | ソーダ工業製品                                                  | 4.49E+1                                                                     | 1.04E+1                                               | 1.72E+1                                             | 1.72E+1                                                        | 2.13E+1                                     |
| JD109      | 202901      | Inorganic pigment                                           | 無機顔料                                                     | 2.43E+1                                                                     | 2.44E+0                                               | 6.05E+0                                             | 1.58E+1                                                        | 9.18E+0                                     |
| JD110      | 202902      | Compressed gas and liquefied gas                            | 圧縮ガス・液化ガス                                                | 1.13E+1                                                                     | 7.92E-1                                               | 4.91E+0                                             | 5.60E+0                                                        | 7.03E+0                                     |
| JD111      | 202903      | Salt                                                        | 塩                                                        | 4.92E+1                                                                     | 3.01E+1                                               | 3.22E+0                                             | 1.58E+1                                                        | 1.94E+1                                     |
| JD112      | 202909      | Other industrial inorganic chemicals                        | その他の無機化学工業製品                                             | 3.06E+1                                                                     | 7.03E+0                                               | 5.35E+0                                             | 1.82E+1                                                        | 8.55E+0                                     |
| JD113      | 203101      | Petrochemical basic products                                | 石油化学基礎製品                                                 | 2.59E+1                                                                     | 3.47E-1                                               | 3.34E+0                                             | 2.22E+1                                                        | 2.24E+1                                     |
| JD114      | 203102      | Petrochemical aromatic products<br>(except synthetic resin) | 石油化学系芳香族製品                                               | 2.17E+1                                                                     | 4.03E-1                                               | 2.36E+0                                             | 1.90E+1                                                        | 2.29E+1                                     |
| JD115      | 203201      | Aliphatic intermediates                                     | 脂肪族中間物                                                   | 2.73E+1                                                                     | 3.84E+0                                               | 7.19E+0                                             | 1.63E+1                                                        | 1.24E+1                                     |
| JD116      | 203202      | Cyclic intermediates                                        | 環式中間物                                                    | 2.24E+1                                                                     | 1.12E+0                                               | 3.05E+0                                             | 1.83E+1                                                        | 1.89E+1                                     |
| JD117      | 203301      | Synthetic rubber                                            | 合成ゴム                                                     | 2.01E+1                                                                     | 3.30E+0                                               | 6.59E+0                                             | 1.02E+1                                                        | 1.12E+1                                     |
| JD118      | 203901      | Methane derivatives                                         | メタン誘導品                                                   | 2.81E+1                                                                     | 9.23E+0                                               | 6.07E+0                                             | 1.28E+1                                                        | 6.61E+0                                     |
| JD119      | 203902      | Oil and fat industrial chemicals                            | 油脂加工製品                                                   | 1.30E+1                                                                     | 1.07E+0                                               | 2.57E+0                                             | 9.38E+0                                                        | 1.84E+1                                     |
| JD120      | 203903      | Plasticizers                                                | 可塑剤                                                      | 2.54E+1                                                                     | 4.60E+0                                               | 4.63E+0                                             | 1.62E+1                                                        | 1.17E+1                                     |
| JD121      | 203904      | Synthetic dyes                                              | 合成染料                                                     | 2.20E+1                                                                     | 1.85E+0                                               | 5.57E+0                                             | 1.46E+1                                                        | 1.53E+1                                     |
| JD122      | 203909      | Other industrial organic chemicals                          | その他の有機化学工業製品                                             | 1.73E+1                                                                     | 6.16E-1                                               | 5.64E+0                                             | 1.10E+1                                                        | 1.02E+1                                     |
| JD123      | 204101      | Thermo-setting resins                                       | 熱硬化性樹脂                                                   | 1.88E+1                                                                     | 9.62E-1                                               | 3.80E+0                                             | 1.41E+1                                                        | 1.41E+1                                     |
| JD124      | 204102      | Thermoplastics resins                                       | 熱可塑性樹脂                                                   | 1.96E+1                                                                     | 1.36E+0                                               | 3.71E+0                                             | 1.45E+1                                                        | 1.66E+1                                     |
| JD125      | 204103      | High function resins                                        | 高機能性樹脂                                                   | 1.79E+1                                                                     | 3.84E-1                                               | 4.07E+0                                             | 1.34E+1                                                        | 1.44E+1                                     |
| JD126      | 204109      | Other resins                                                | その他の合成樹脂                                                 | 1.84E+1                                                                     | 6.42E-1                                               | 4.18E+0                                             | 1.36E+1                                                        | 1.48E+1                                     |
| JD127      | 205101      | Rayon and acetate                                           | レーヨン・アセテート                                               | 1.64E+1                                                                     | 3.30E+0                                               | 4.53E+0                                             | 8.56E+0                                                        | 9.21E+0                                     |
| JD128      | 205102      | Synthetic fibers                                            | 合成繊維                                                     | 2.33E+1                                                                     | 7.81E+0                                               | 5.38E+0                                             | 1.01E+1                                                        | 8.78E+0                                     |
| JD129      | 206101      | Medicaments                                                 | 医薬品                                                      | 6.85E+0                                                                     | 8.36E-1                                               | 1.69E+0                                             | 4.33E+0                                                        | 1.05E+1                                     |
| JD130      | 207101      | Soap, synthetic detergents and surface<br>active agents     | 石けん・合成洗剤・界面活性剤                                           | 1.39E+1                                                                     | 1.15E+0                                               | 2.80E+0                                             | 9.92E+0                                                        | 1.29E+1                                     |
| JD131      | 207102      | Cosmetics, toilet preparations and<br>dentifrices           | 化粧品・歯磨                                                   | 8.62E+0                                                                     | 5.51E-1                                               | 2.79E+0                                             | 5.28E+0                                                        | 1.04E+1                                     |
| JD132      | 207201      | Paint and varnishes                                         | 塗料                                                       | 1.59E+1                                                                     | 1.93E-1                                               | 3.27E+0                                             | 1.25E+1                                                        | 1.36E+1                                     |
| JD133      | 207202      | Printing ink                                                | 印刷インキ                                                    | 1.43E+1                                                                     | 6.09E-2                                               | 2.96E+0                                             | 1.13E+1                                                        | 1.55E+1                                     |
| JD134      | 207301      | Photographic sensitive materials                            | 写真感光材料                                                   | 2.07E+1                                                                     | 5.01E+0                                               | 4.07E+0                                             | 1.16E+1                                                        | 7.87E+0                                     |
| JD135      | 207401      | Agricultural chemicals                                      | 農薬                                                       | 1.48E+1                                                                     | 1.98E+0                                               | 3.86E+0                                             | 8.98E+0                                                        | 9.79E+0                                     |
| JD136      | 207901      | Gelatin and adhesives                                       | ゼラチン・接着剤                                                 | 1.44E+1                                                                     | 1.82E+0                                               | 2.87E+0                                             | 9.72E+0                                                        | 1.22E+1                                     |
| JD137      | 207909      | Other final chemical products                               | その他の化学最終製品                                               | 1.93E+1                                                                     | 2.61E+0                                               | 4.03E+0                                             | 1.27E+1                                                        | 1.01E+1                                     |
| JD138      | 211101      | Petroleum refinery products (inc.<br>greases)               | 石油製品                                                     | 2.51E+1                                                                     | 4.39E+0                                               | 1.04E+0                                             | 1.96E+1                                                        | 2.66E+1                                     |
| JD139      | 212101      | Coal products                                               | 石炭製品                                                     | 2.37E+1                                                                     | 3.24E+0                                               | 9.07E-1                                             | 1.96E+1                                                        | 1.57E+1                                     |
| JD140      | 212102      | Paving materials                                            | 舗装材料                                                     | 9.78E+0                                                                     | 8.89E-1                                               | 2.30E+0                                             | 6.59E+0                                                        | 1.79E+1                                     |
| JD141      | 221101      | Plastic products                                            | プラスチック製品                                                 | 1.34E+1                                                                     | 4.26E-1                                               | 2.26E+0                                             | 1.07E+1                                                        | 1.43E+1                                     |
| JD142      | 231101      | Tires and inner tubes                                       | タイヤ・チューブ                                                 | 1.40E+1                                                                     | 7.52E-1                                               | 3.27E+0                                             | 1.00E+1                                                        | 1.39E+1                                     |
| JD143      | 231901      | Rubber footwear                                             | ゴム製履物                                                    | 9.46E+0                                                                     | 3.99E+0                                               | 1.27E+0                                             | 4.20E+0                                                        | 7.17E+0                                     |
| JD144      | 231902      | Plastic footwear                                            | プラスチック製履物                                                | 1.23E+1                                                                     | 2.51E+0                                               | 1.62E+0                                             | 8.13E+0                                                        | 9.80E+0                                     |
| JD145      | 231909      | Other rubber products                                       | その他のゴム製品                                                 | 9.64E+0                                                                     | 7.65E-1                                               | 2.11E+0                                             | 6.76E+0                                                        | 1.18E+1                                     |
| JD146      | 241101      | Leather footwear                                            | 革製履物                                                     | 1.15E+1                                                                     | 4.12E-1                                               | 1.03E+0                                             | 1.01E+1                                                        | 1.18E+1                                     |
| JD147      | 241201      | Leather and fur skins                                       | 皮革・毛皮                                                    | 9.80E+0                                                                     | 1.30E+0                                               | 8.43E-1                                             | 7.65E+0                                                        | 1.24E+1                                     |
| JD148      | 241202      | Miscellaneous leather products                              | かばん・袋物・その他の革製品                                           | 8.49E+0                                                                     | 3.50E-1                                               | 1.31E+0                                             | 6.83E+0                                                        | 1.16E+1                                     |
| JD149      | 251101      | Sheet glass and safety glass                                | 板ガラス・安全ガラス                                               | 8.15E+0                                                                     | 2.84E-1                                               | 1.50E+0                                             | 6.36E+0                                                        | 1.15E+1                                     |
| JD150      | 251201      | Glass fiber and glass fiber products,<br>n.e.c.             | ガラス繊維・同製品                                                | 1.19E+1                                                                     | 2.82E+0                                               | 4.09E+0                                             | 4.99E+0                                                        | 6.78E+0                                     |
| JD151      | 251909      | Other glass products                                        | その他のガラス製品                                                | 1.03E+1                                                                     | 2.58E+0                                               | 2.10E+0                                             | 5.66E+0                                                        | 7.67E+0                                     |
| JD152      | 252101      | Cement                                                      | セメント                                                     | 1.30E+2                                                                     | 1.13E+2                                               | 1.02E+1                                             | 6.59E+0                                                        | 7.73E-1                                     |
| JD153      | 252201      | Ready mixed concrete                                        | 生コンクリート                                                  | 2.76E+1                                                                     | 4.34E-1                                               | 2.34E+1                                             | 3.80E+0                                                        | 2.21E+0                                     |
| JD154      | 252301      | Cement products                                             | セメント製品                                                   | 1.52E+1                                                                     | 4.12E+0                                               | 7.02E+0                                             | 4.08E+0                                                        | 4.09E+0                                     |
| JD155      | 253101      | Pottery, china and earthenware                              | 陶磁器                                                      | 9.22E+0                                                                     | 5.05E-1                                               | 2.08E+0                                             | 6.64E+0                                                        | 1.02E+1                                     |
| JD156      | 259901      | Clay refractories                                           | 耐火物                                                      | 2.90E+1                                                                     | 8.60E+0                                               | 4.28E+0                                             | 1.61E+1                                                        | 6.93E+0                                     |
| JD157      | 259902      | Other structural clay products                              | その他の建設用土石製品                                              | 1.03E+2                                                                     | 9.30E+1                                               | 4.23E+0                                             | 6.12E+0                                                        | 8.66E-1                                     |
| JD158      | 259903      | Carbon and graphite products                                | 炭素・黒鉛製品                                                  | 1.46E+1                                                                     | 4.11E+0                                               | 2.99E+0                                             | 7.45E+0                                                        | 7.54E+0                                     |
| JD159      | 259904      | Abrasive                                                    | 研磨材                                                      | 1.94E+1                                                                     | 3.95E+0                                               | 1.69E+0                                             | 1.38E+1                                                        | 8.80E+0                                     |
| JD160      | 259909      | Miscellaneous ceramic, stone and clay<br>products           | その他の窯業・土石製品                                              | 9.76E+0                                                                     | 1.02E+0                                               | 2.07E+0                                             | 6.66E+0                                                        | 9.13E+0                                     |
| JD161      | 261101      | Pig iron                                                    | 鉄鉄                                                       | 3.17E+1                                                                     | 1.95E+0                                               | 3.78E+0                                             | 2.60E+1                                                        | 1.37E+1                                     |
| JD162      | 261102      | Ferro alloys                                                | フェロアロイ                                                   | 3.75E+1                                                                     | 9.30E+0                                               | 3.02E+0                                             | 2.52E+1                                                        | 1.10E+1                                     |
| JD163      | 261103      | Crude steel (converters)                                    | 粗鋼(転炉)                                                   | 3.41E+1                                                                     | 1.47E+0                                               | 4.42E+0                                             | 2.82E+1                                                        | 1.14E+1                                     |
| JD164      | 261104      | Crude steel (electric furnaces)                             | 粗鋼(電気炉)                                                  | 6.68E+1                                                                     | 5.13E-1                                               | 3.52E+0                                             | 6.28E+1                                                        | 1.69E+1                                     |
| JD165      | 261201      | Scrap iron                                                  | 鉄屑                                                       | 0.00E+0                                                                     | 0.00E+0                                               | 0.00E+0                                             | 0.00E+0                                                        | 0.00E+0                                     |
| JD166      | 262101      | Hot rolled steel                                            | 熱間圧延鋼材                                                   | 2.99E+1                                                                     | 3.06E-1                                               | 4.06E+0                                             | 2.56E+1                                                        | 1.25E+1                                     |
| JD167      | 262201      | Steel pipes and tubes                                       | 鋼管                                                       | 2.36E+1                                                                     | 2.12E-1                                               | 3.16E+0                                             | 2.02E+1                                                        | 1.81E+1                                     |
| JD168      | 262301      | Cold-finished steel                                         | 冷間仕上鋼材                                                   | 2.55E+1                                                                     | 2.85E-1                                               | 4.34E+0                                             | 2.09E+1                                                        | 1.33E+1                                     |
| JD169      | 262302      | Coated steel                                                | めっき鋼材                                                    | 2.14E+1                                                                     | 5.00E-1                                               | 4.11E+0                                             | 1.67E+1                                                        | 1.18E+1                                     |
| JD170      | 263101      | Cast and forged steel                                       | 鍛鋼鋼                                                      | 2.36E+1                                                                     | 5.82E-1                                               | 2.41E+0                                             | 2.06E+1                                                        | 1.40E+1                                     |
| JD171      | 263102      | Cast iron pipes and tubes                                   | 鑄鉄管                                                      | 1.01E+1                                                                     | 2.59E+0                                               | 3.52E+0                                             | 4.03E+0                                                        | 6.29E+0                                     |
| JD172      | 263103      | Cast and forged materials (iron)                            | 鑄鉄品及び鍛工品(鉄)                                              | 1.50E+1                                                                     | 1.87E+0                                               | 5.27E+0                                             | 7.91E+0                                                        | 6.83E+0                                     |
| JD173      | 264901      | Iron and steel shearing and slitting                        | 鉄鋼シャースリット業                                               | 1.77E+1                                                                     | 6.18E-2                                               | 3.41E+0                                             | 1.42E+1                                                        | 1.26E+1                                     |
| JD174      | 264909      | Other iron or steel products                                | その他の鉄鋼製品                                                 | 1.14E+1                                                                     | 5.91E-1                                               | 2.32E+0                                             | 8.47E+0                                                        | 1.11E+1                                     |
| JD175      | 271101      | Copper                                                      | 銅                                                        | 4.19E+1                                                                     | 1.73E+0                                               | 1.24E+0                                             | 3.90E+1                                                        | 1.98E+1                                     |
| JD176      | 271102      | Lead and zinc (inc. regenerated lead)                       | 鉛・亜鉛(含再生)                                                | 2.67E+1                                                                     | 1.38E+0                                               | 2.28E+0                                             | 2.30E+1                                                        | 1.66E+1                                     |
| JD177      | 271103      | Aluminum (inc. regenerated aluminum)                        | アルミニウム(含再生)                                              | 3.75E+1                                                                     | 5.13E+0                                               | 2.80E+0                                             | 2.96E+1                                                        | 1.41E+1                                     |
| JD178      | 271109      | Other non-ferrous metals                                    | その他の非鉄金属地金                                               | 3.45E+1                                                                     | 3.25E-1                                               | 1.88E+0                                             | 3.23E+1                                                        | 1.97E+1                                     |
| JD179      | 271201      | Non-ferrous metal scrap                                     | 非鉄金属屑                                                    | 0.00E+0                                                                     | 0.00E+0                                               | 0.00E+0                                             | 0.00E+0                                                        | 0.00E+0                                     |
| JD180      | 272101      | Electric wires and cables                                   | 電線・ケーブル                                                  | 3.93E+1                                                                     | 1.15E-1                                               | 1.94E+0                                             | 3.72E+1                                                        | 1.20E+1                                     |
| JD181      | 272102      | Optical fiber cables                                        | 光ファイバケーブル                                                | 2.09E+1                                                                     | 1.40E-1                                               | 2.77E+0                                             | 1.80E+1                                                        | 1.23E+1                                     |
| JD182      | 272201      | Rolled and drawn copper and copper<br>alloys                | 伸銅品                                                      | 4.41E+1                                                                     | 5.18E-1                                               | 2.04E+0                                             | 4.16E+1                                                        | 1.37E+1                                     |
| JD183      | 272202      | Rolled and drawn aluminum                                   | アルミ圧延製品                                                  | 1.03E+2                                                                     | 4.28E-1                                               | 1.16E+0                                             | 1.01E+2                                                        | 2.08E+1                                     |
| JD184      | 272203      | Non-ferrous metal castings and forgings                     | 非鉄金属成形材                                                  | 4.46E+1                                                                     | 3.12E-1                                               | 2.76E+0                                             | 4.15E+1                                                        | 1.67E+1                                     |
| JD185      | 272204      | Nuclear fuels                                               | 核燃料                                                      | 2.99E+1                                                                     | 0.00E+0                                               | 5.36E-1                                             | 2.94E+1                                                        | 2.04E+1                                     |

Table A10: Embodied global SO<sub>x</sub> intensities of Japanese goods and services based on producer price in 2005 [3/5]

| Sector no. | Sector code | Sector name<br>[Japanese domestic commodity]               | Sector name in Japanese<br>[Japanese domestic commodity] | Embodied global SO <sub>x</sub> intensities based on producer price in 2005 |                                                       |                                                     |                                                                |                                             |
|------------|-------------|------------------------------------------------------------|----------------------------------------------------------|-----------------------------------------------------------------------------|-------------------------------------------------------|-----------------------------------------------------|----------------------------------------------------------------|---------------------------------------------|
|            |             |                                                            |                                                          | Total                                                                       | (D) Direct emissions<br>in Japan during<br>production | (S) Induced<br>emissions in Japan<br>through supply | (F) Induced emissions<br>in foreign country's<br>supply chains | Coefficient of variance<br>of the intensity |
|            |             |                                                            |                                                          | kg/M-JPY                                                                    | kg/M-JPY                                              | kg/M-JPY                                            | kg/M-JPY                                                       | %                                           |
| JD186      | 272209      | Other non-ferrous metal products                           | その他の非鉄金属製品                                               | 8.02E+1                                                                     | 4.30E-1                                               | 1.32E+0                                             | 7.84E+1                                                        | 1.93E+1                                     |
| JD187      | 281101      | Metal products for construction                            | 建設用金属製品                                                  | 1.29E+1                                                                     | 1.88E-1                                               | 2.00E+0                                             | 1.07E+1                                                        | 1.17E+1                                     |
| JD188      | 281201      | Metal products for architecture                            | 建築用金属製品                                                  | 2.45E+1                                                                     | 2.47E-1                                               | 1.41E+0                                             | 2.28E+1                                                        | 1.99E+1                                     |
| JD189      | 289101      | Gas and oil appliances and heating and cooking apparatus   | ガス・石油機器及び暖房機器                                            | 1.55E+1                                                                     | 2.62E-1                                               | 1.94E+0                                             | 1.33E+1                                                        | 1.38E+1                                     |
| JD190      | 289901      | Bolts, nuts, rivets and springs                            | ボルト・ナット・リベット及びスプリング                                      | 1.36E+1                                                                     | 2.24E-1                                               | 1.61E+0                                             | 1.18E+1                                                        | 2.73E+1                                     |
| JD191      | 289902      | Metal containers, fabricated plate and sheet metal         | 金属製容器及び製缶板金製品                                            | 1.14E+1                                                                     | 8.98E-2                                               | 1.71E+0                                             | 9.60E+0                                                        | 1.93E+1                                     |
| JD192      | 289903      | Plumber's supplies, powder metallurgy products and tools   | 配管工事付属品・粉末や金製品・道具類                                       | 1.66E+1                                                                     | 4.48E-1                                               | 1.37E+0                                             | 1.48E+1                                                        | 1.60E+1                                     |
| JD193      | 289909      | Other metal products                                       | その他の金属製品                                                 | 1.46E+1                                                                     | 4.87E-1                                               | 1.47E+0                                             | 1.27E+1                                                        | 1.69E+1                                     |
| JD194      | 301101      | Boilers                                                    | ボイラ                                                      | 6.69E+0                                                                     | 3.45E-1                                               | 1.08E+0                                             | 5.26E+0                                                        | 1.22E+1                                     |
| JD195      | 301102      | Turbines                                                   | タービン                                                     | 8.74E+0                                                                     | 5.58E-1                                               | 1.24E+0                                             | 6.94E+0                                                        | 1.22E+1                                     |
| JD196      | 301103      | Engines                                                    | 原動機                                                      | 1.13E+1                                                                     | 2.42E-1                                               | 1.65E+0                                             | 9.37E+0                                                        | 1.22E+1                                     |
| JD197      | 301201      | Conveyors                                                  | 運搬機械                                                     | 1.25E+1                                                                     | 1.45E-1                                               | 1.24E+0                                             | 1.12E+1                                                        | 1.31E+1                                     |
| JD198      | 301301      | Refrigerators and air conditioning apparatus               | 冷凍機・温湿調整装置                                               | 1.28E+1                                                                     | 1.24E-1                                               | 1.19E+0                                             | 1.15E+1                                                        | 1.18E+1                                     |
| JD199      | 301901      | Pumps and compressors                                      | ポンプ及び圧縮機                                                 | 1.16E+1                                                                     | 2.20E-1                                               | 1.46E+0                                             | 9.91E+0                                                        | 1.20E+1                                     |
| JD200      | 301902      | Machinists' precision tools                                | 機械工具                                                     | 1.03E+1                                                                     | 3.81E-1                                               | 1.22E+0                                             | 8.69E+0                                                        | 1.48E+1                                     |
| JD201      | 301909      | Other general industrial machinery and equipment           | その他の一般産業機械及び装置                                           | 9.32E+0                                                                     | 4.56E-1                                               | 1.67E+0                                             | 7.20E+0                                                        | 1.06E+1                                     |
| JD202      | 302101      | Machinery and equipment for construction and mining        | 建設・鉱山機械                                                  | 9.46E+0                                                                     | 4.84E-1                                               | 1.52E+0                                             | 7.46E+0                                                        | 1.19E+1                                     |
| JD203      | 302201      | Chemical machinery                                         | 化学機械                                                     | 7.25E+0                                                                     | 1.94E-1                                               | 1.13E+0                                             | 5.93E+0                                                        | 1.19E+1                                     |
| JD204      | 302301      | Industrial robots                                          | 産業用ロボット                                                  | 9.08E+0                                                                     | 0.00E+0                                               | 1.24E+0                                             | 7.84E+0                                                        | 1.43E+1                                     |
| JD205      | 302401      | Metal machine tools                                        | 金属工作機械                                                   | 7.35E+0                                                                     | 9.96E-2                                               | 1.16E+0                                             | 6.09E+0                                                        | 1.31E+1                                     |
| JD206      | 302402      | Metal processing machinery                                 | 金属加工機械                                                   | 7.38E+0                                                                     | 7.68E-2                                               | 1.33E+0                                             | 5.97E+0                                                        | 1.29E+1                                     |
| JD207      | 302901      | Machinery for agricultural use                             | 農業用機械                                                    | 7.81E+0                                                                     | 3.15E-1                                               | 1.43E+0                                             | 6.07E+0                                                        | 1.12E+1                                     |
| JD208      | 302902      | Textile machinery                                          | 繊維機械                                                     | 1.05E+1                                                                     | 2.93E-1                                               | 1.30E+0                                             | 8.93E+0                                                        | 1.25E+1                                     |
| JD209      | 302903      | Food processing machinery and equipment                    | 食品機械・同装置                                                 | 9.21E+0                                                                     | 1.46E-1                                               | 1.41E+0                                             | 7.66E+0                                                        | 1.26E+1                                     |
| JD210      | 302904      | Semiconductor making equipment                             | 半導体製造装置                                                  | 7.02E+0                                                                     | 1.11E-1                                               | 1.12E+0                                             | 5.79E+0                                                        | 1.25E+1                                     |
| JD211      | 302905      | Vacuum equipment and vacuum component                      | 真空装置・真空機器                                                | 9.41E+0                                                                     | 2.85E-1                                               | 1.38E+0                                             | 7.74E+0                                                        | 1.15E+1                                     |
| JD212      | 302909      | Other special machinery for industrial use                 | その他の特殊産業用機械                                              | 9.23E+0                                                                     | 3.00E-1                                               | 1.21E+0                                             | 7.72E+0                                                        | 1.27E+1                                     |
| JD213      | 303101      | Metal molds                                                | 金型                                                       | 7.46E+0                                                                     | 2.67E-1                                               | 1.48E+0                                             | 5.72E+0                                                        | 1.07E+1                                     |
| JD214      | 303102      | Bearings                                                   | ベアリング                                                    | 1.05E+1                                                                     | 6.19E-1                                               | 1.83E+0                                             | 8.00E+0                                                        | 1.05E+1                                     |
| JD215      | 303109      | Other general machines and parts                           | その他の一般機械器具及び部品                                           | 1.21E+1                                                                     | 4.44E-1                                               | 1.43E+0                                             | 1.02E+1                                                        | 1.17E+1                                     |
| JD216      | 311101      | Copy machine                                               | 複写機                                                      | 1.20E+1                                                                     | 1.84E-1                                               | 1.40E+0                                             | 1.04E+1                                                        | 1.78E+1                                     |
| JD217      | 311109      | Other office machines                                      | その他の事務用機械                                                | 1.01E+1                                                                     | 9.65E-2                                               | 1.23E+0                                             | 8.81E+0                                                        | 1.76E+1                                     |
| JD218      | 311201      | Machinery for service industry                             | サービス用機器                                                  | 1.02E+1                                                                     | 1.28E-1                                               | 1.28E+0                                             | 8.75E+0                                                        | 1.58E+1                                     |
| JD219      | 321101      | Rotating electrical equipment                              | 回転電気機械                                                   | 1.74E+1                                                                     | 4.26E-2                                               | 1.59E+0                                             | 1.57E+1                                                        | 1.45E+1                                     |
| JD220      | 321102      | Transformers and reactors                                  | 変圧器・変成器                                                  | 1.91E+1                                                                     | 9.69E-3                                               | 1.46E+0                                             | 1.76E+1                                                        | 1.53E+1                                     |
| JD221      | 321103      | Relay switches and switchboards                            | 開閉制御装置及び配電盤                                              | 1.20E+1                                                                     | 2.19E-2                                               | 1.22E+0                                             | 1.08E+1                                                        | 1.35E+1                                     |
| JD222      | 321104      | Wiring devices and supplies                                | 配線器具                                                     | 1.40E+1                                                                     | 1.74E-2                                               | 1.13E+0                                             | 1.29E+1                                                        | 1.21E+1                                     |
| JD223      | 321105      | Electrical equipment for internal combustion engines       | 内燃機関電装品                                                  | 1.10E+1                                                                     | 2.38E-2                                               | 1.32E+0                                             | 9.69E+0                                                        | 1.31E+1                                     |
| JD224      | 321109      | Other electrical devices and parts                         | その他の産業用電気機器                                              | 1.39E+1                                                                     | 8.87E-3                                               | 1.48E+0                                             | 1.24E+1                                                        | 1.31E+1                                     |
| JD225      | 322101      | Applied electronic equipment                               | 電子応用装置                                                   | 1.04E+1                                                                     | 1.42E-3                                               | 9.17E-1                                             | 9.46E+0                                                        | 2.15E+1                                     |
| JD226      | 323101      | Electric measuring instruments                             | 電気計測器                                                    | 9.08E+0                                                                     | 6.32E-4                                               | 8.21E-1                                             | 8.26E+0                                                        | 2.03E+1                                     |
| JD227      | 324101      | Electric bulbs                                             | 電球類                                                      | 6.70E+0                                                                     | 3.32E-2                                               | 1.42E+0                                             | 5.24E+0                                                        | 1.28E+1                                     |
| JD228      | 324102      | Electric lighting fixtures and apparatus                   | 電気照明器具                                                   | 9.87E+0                                                                     | 1.34E-3                                               | 1.27E+0                                             | 8.59E+0                                                        | 1.33E+1                                     |
| JD229      | 324103      | Batteries                                                  | 電池                                                       | 2.42E+1                                                                     | 5.54E-2                                               | 2.01E+0                                             | 2.21E+1                                                        | 1.30E+1                                     |
| JD230      | 324109      | Other electrical devices and parts                         | その他の電気機械器具                                               | 3.20E+1                                                                     | 1.33E-1                                               | 1.06E+0                                             | 3.08E+1                                                        | 1.68E+1                                     |
| JD231      | 325101      | Household air-conditioners                                 | 民生用エアコンディショナ                                             | 1.14E+1                                                                     | 2.74E-2                                               | 1.31E+0                                             | 1.00E+1                                                        | 1.57E+1                                     |
| JD232      | 325102      | Household electric appliances (except air-conditioners)    | 民生用電気機器(除エアコン)                                           | 1.29E+1                                                                     | 3.40E-2                                               | 1.24E+0                                             | 1.16E+1                                                        | 1.44E+1                                     |
| JD233      | 331101      | Video recording and playback equipment                     | ビデオ機器                                                    | 1.46E+1                                                                     | 1.87E-3                                               | 1.24E+0                                             | 1.33E+1                                                        | 1.78E+1                                     |
| JD234      | 331102      | Electric audio equipment                                   | 電気音響機器                                                   | 1.21E+1                                                                     | 1.77E-2                                               | 1.16E+0                                             | 1.09E+1                                                        | 1.78E+1                                     |
| JD235      | 331103      | Radio and television sets                                  | ラジオ・テレビ受信機                                               | 1.01E+1                                                                     | 8.82E-3                                               | 1.24E+0                                             | 8.85E+0                                                        | 1.82E+1                                     |
| JD236      | 332101      | Wired communication equipment                              | 有線電気通信機器                                                 | 1.28E+1                                                                     | 5.78E-2                                               | 1.11E+0                                             | 1.16E+1                                                        | 1.60E+1                                     |
| JD237      | 332102      | Cellular phones                                            | 携帯電話機                                                    | 1.24E+1                                                                     | 4.44E-2                                               | 1.04E+0                                             | 1.13E+1                                                        | 1.84E+1                                     |
| JD238      | 332103      | Radio communication equipment (except cellular phones)     | 無線電気通信機器(除携帯電話機)                                         | 1.45E+1                                                                     | 1.36E-3                                               | 1.02E+0                                             | 1.35E+1                                                        | 1.69E+1                                     |
| JD239      | 332109      | Other communication equipment                              | その他の電気通信機器                                               | 9.51E+0                                                                     | 1.67E-2                                               | 9.57E-1                                             | 8.54E+0                                                        | 1.61E+1                                     |
| JD240      | 333101      | Personal Computers                                         | パーソナルコンピュータ                                              | 1.51E+1                                                                     | 2.16E-2                                               | 9.21E-1                                             | 1.41E+1                                                        | 2.15E+1                                     |
| JD241      | 333102      | Electronic computing equipment (except personal computers) | 電子計算機本体(除パソコン)                                           | 1.22E+1                                                                     | 2.24E-2                                               | 7.61E-1                                             | 1.14E+1                                                        | 2.15E+1                                     |
| JD242      | 333103      | Electronic computing equipment (accessory equipment)       | 電子計算機付属装置                                                | 1.15E+1                                                                     | 4.31E-3                                               | 1.00E+0                                             | 1.05E+1                                                        | 2.09E+1                                     |
| JD243      | 341101      | Semiconductor devices                                      | 半導体素子                                                    | 8.79E+0                                                                     | 1.17E-1                                               | 1.18E+0                                             | 7.49E+0                                                        | 1.25E+1                                     |
| JD244      | 341102      | Integrated circuits                                        | 集積回路                                                     | 1.08E+1                                                                     | 1.22E-1                                               | 1.43E+0                                             | 9.27E+0                                                        | 1.53E+1                                     |
| JD245      | 342101      | Electron tubes                                             | 電子管                                                      | 1.32E+1                                                                     | 2.31E-1                                               | 2.07E+0                                             | 1.09E+1                                                        | 1.42E+1                                     |
| JD246      | 342102      | Liquid crystal element                                     | 液晶素子                                                     | 1.21E+1                                                                     | 8.29E-2                                               | 1.39E+0                                             | 1.07E+1                                                        | 2.19E+1                                     |
| JD247      | 342103      | Magnetic tapes and discs                                   | 磁気テープ・磁気ディスク                                             | 8.72E+0                                                                     | 4.29E-1                                               | 2.25E+0                                             | 6.04E+0                                                        | 1.17E+1                                     |
| JD248      | 342109      | Other electronic components                                | その他の電子部品                                                 | 1.47E+1                                                                     | 9.63E-2                                               | 1.41E+0                                             | 1.32E+1                                                        | 1.38E+1                                     |
| JD249      | 351101      | Passenger motor cars                                       | 乗用車                                                      | 1.12E+1                                                                     | 3.06E-2                                               | 1.96E+0                                             | 9.23E+0                                                        | 1.28E+1                                     |
| JD250      | 352101      | Trucks, buses and other cars                               | トラック・バス・その他の自動車                                          | 1.15E+1                                                                     | 1.44E-1                                               | 1.95E+0                                             | 9.37E+0                                                        | 1.26E+1                                     |
| JD251      | 353101      | Two-wheel motor vehicles                                   | 二輪自動車                                                    | 1.15E+1                                                                     | 1.98E-1                                               | 1.75E+0                                             | 9.60E+0                                                        | 1.24E+1                                     |
| JD252      | 354101      | Motor vehicle bodies                                       | 自動車車体                                                    | 1.24E+1                                                                     | 1.21E-1                                               | 2.05E+0                                             | 1.03E+1                                                        | 1.85E+1                                     |
| JD253      | 354102      | Internal combustion engines for motor vehicles and parts   | 自動車用内燃機関・同部品                                             | 1.57E+1                                                                     | 7.23E-1                                               | 1.83E+0                                             | 1.31E+1                                                        | 1.22E+1                                     |
| JD254      | 354103      | Motor vehicle parts and accessories                        | 自動車部品                                                    | 1.19E+1                                                                     | 3.16E-1                                               | 1.95E+0                                             | 9.64E+0                                                        | 1.22E+1                                     |
| JD255      | 361101      | Steel ships                                                | 鋼船                                                       | 1.31E+1                                                                     | 7.70E-2                                               | 2.84E+0                                             | 1.02E+1                                                        | 1.25E+1                                     |
| JD256      | 361102      | Ships (except steel ships)                                 | その他の船舶                                                   | 7.55E+0                                                                     | 2.06E-2                                               | 2.32E+0                                             | 5.21E+0                                                        | 1.05E+1                                     |
| JD257      | 361103      | Internal combustion engines for vessels                    | 船用内燃機関                                                   | 1.43E+1                                                                     | 4.36E+0                                               | 3.14E+0                                             | 6.81E+0                                                        | 6.61E+0                                     |
| JD258      | 361110      | Repair of ships                                            | 船舶修理                                                     | 8.41E+0                                                                     | 4.39E-3                                               | 2.02E+0                                             | 6.38E+0                                                        | 1.25E+1                                     |
| JD259      | 362101      | Rolling stock                                              | 鉄道車両                                                     | 1.21E+1                                                                     | 7.43E-1                                               | 1.69E+0                                             | 9.63E+0                                                        | 1.12E+1                                     |
| JD260      | 362110      | Repair of rolling stock                                    | 鉄道車両修理                                                   | 1.24E+1                                                                     | 3.71E-1                                               | 2.12E+0                                             | 9.95E+0                                                        | 1.09E+1                                     |
| JD261      | 362201      | Aircrafts                                                  | 航空機                                                      | 9.37E+0                                                                     | 2.38E+0                                               | 1.39E+0                                             | 5.60E+0                                                        | 1.18E+1                                     |
| JD262      | 362210      | Repair of aircrafts                                        | 航空機修理                                                    | 7.78E+0                                                                     | 0.00E+0                                               | 8.37E-1                                             | 6.94E+0                                                        | 3.46E+1                                     |
| JD263      | 362901      | Bicycles                                                   | 自転車                                                      | 2.26E+1                                                                     | 2.80E-1                                               | 1.70E+0                                             | 2.06E+1                                                        | 1.20E+1                                     |
| JD264      | 362909      | Other transport equipment                                  | その他の輸送機械                                                 | 9.73E+0                                                                     | 4.08E-1                                               | 1.96E+0                                             | 7.35E+0                                                        | 1.04E+1                                     |
| JD265      | 371101      | Camera                                                     | カメラ                                                      | 9.67E+0                                                                     | 2.88E-1                                               | 1.03E+0                                             | 8.35E+0                                                        | 1.68E+1                                     |
| JD266      | 371109      | Other photographic and optical instruments                 | その他の光学機械                                                 | 8.46E+0                                                                     | 1.88E-1                                               | 1.40E+0                                             | 6.87E+0                                                        | 1.26E+1                                     |
| JD267      | 371201      | Watches and clocks                                         | 時計                                                       | 9.34E+0                                                                     | 9.85E-2                                               | 1.00E+0                                             | 8.24E+0                                                        | 1.96E+1                                     |
| JD268      | 371901      | Professional and scientific instruments                    | 理化学機械器具                                                  | 5.14E+0                                                                     | 7.61E-2                                               | 1.05E+0                                             | 4.02E+0                                                        | 1.14E+1                                     |

Table A10: Embodied global SO<sub>x</sub> intensities of Japanese goods and services based on producer price in 2005 [4/5]

| Sector no. | Sector code | Sector name<br>[Japanese domestic commodity]                   | Sector name in Japanese<br>[Japanese domestic commodity] | Embodied global SO <sub>x</sub> intensities based on producer price in 2005 |                                                       |                                                     |                                                                |                                             |
|------------|-------------|----------------------------------------------------------------|----------------------------------------------------------|-----------------------------------------------------------------------------|-------------------------------------------------------|-----------------------------------------------------|----------------------------------------------------------------|---------------------------------------------|
|            |             |                                                                |                                                          | Total                                                                       | (D) Direct emissions<br>in Japan during<br>production | (S) Induced<br>emissions in Japan<br>through supply | (F) Induced emissions<br>in foreign country's<br>supply chains | Coefficient of variance<br>of the intensity |
|            |             |                                                                |                                                          | kg/M-JPY                                                                    | kg/M-JPY                                              | kg/M-JPY                                            | kg/M-JPY                                                       | %                                           |
| JD269      | 371902      | Analytical instruments, testing machine, measuring instruments | 分析器・試験機・計量器・測定器                                          | 7.55E+0                                                                     | 8.42E-2                                               | 1.02E+0                                             | 6.44E+0                                                        | 1.44E+1                                     |
| JD270      | 371903      | Medical instruments                                            | 医療用機械器具                                                  | 9.31E+0                                                                     | 2.77E-1                                               | 1.20E+0                                             | 7.83E+0                                                        | 1.30E+1                                     |
| JD271      | 391101      | Toys and games                                                 | がん具                                                      | 1.39E+1                                                                     | 9.03E-1                                               | 1.19E+0                                             | 1.18E+1                                                        | 1.32E+1                                     |
| JD272      | 391102      | Sporting and athletic goods                                    | 運動用品                                                     | 1.06E+1                                                                     | 5.95E-1                                               | 2.12E+0                                             | 7.86E+0                                                        | 1.06E+1                                     |
| JD273      | 391901      | Musical instruments                                            | 楽器                                                       | 6.52E+0                                                                     | 1.53E-1                                               | 1.06E+0                                             | 5.31E+0                                                        | 1.27E+1                                     |
| JD274      | 391902      | Audio and video records, other information recording media     | 情報記録物                                                    | 5.38E+0                                                                     | 5.30E-2                                               | 1.32E+0                                             | 4.01E+0                                                        | 1.19E+1                                     |
| JD275      | 391903      | Stationery                                                     | 筆記具・文具                                                   | 6.21E+0                                                                     | 2.40E-1                                               | 1.46E+0                                             | 4.51E+0                                                        | 1.13E+1                                     |
| JD276      | 391904      | Jewelry and adornments                                         | 身辺細貨品                                                    | 1.88E+1                                                                     | 2.26E-1                                               | 1.06E+0                                             | 1.75E+1                                                        | 1.58E+1                                     |
| JD277      | 391905      | "Tatami" (straw matting) and straw products                    | 畳・わら加工品                                                  | 1.95E+1                                                                     | 2.08E-2                                               | 5.93E-1                                             | 1.89E+1                                                        | 1.42E+1                                     |
| JD278      | 391906      | Ordnance                                                       | 武器                                                       | 1.24E+1                                                                     | 1.12E-2                                               | 1.55E+0                                             | 1.08E+1                                                        | 1.28E+1                                     |
| JD279      | 391909      | Miscellaneous manufacturing products                           | その他の製造工業製品                                               | 8.40E+0                                                                     | 7.73E-2                                               | 1.57E+0                                             | 6.75E+0                                                        | 1.15E+1                                     |
| JD280      | 392101      | Reuse and recycling                                            | 再生資源回収・加工処理                                              | 8.51E+0                                                                     | 1.54E+0                                               | 5.44E+0                                             | 1.53E+0                                                        | 4.13E+0                                     |
| JD281      | 411101      | Residential construction (wooden)                              | 住宅建築(木造)                                                 | 7.51E+0                                                                     | 2.60E-2                                               | 1.63E+0                                             | 5.86E+0                                                        | 1.13E+1                                     |
| JD282      | 411102      | Residential construction (non-wooden)                          | 住宅建築(非木造)                                                | 8.81E+0                                                                     | 1.02E-1                                               | 2.12E+0                                             | 6.58E+0                                                        | 1.07E+1                                     |
| JD283      | 411201      | Non-residential construction (wooden)                          | 非住宅建築(木造)                                                | 8.27E+0                                                                     | 3.28E-2                                               | 1.95E+0                                             | 6.28E+0                                                        | 1.11E+1                                     |
| JD284      | 411202      | Non-residential construction (non-wooden)                      | 非住宅建築(非木造)                                               | 9.21E+0                                                                     | 1.56E-1                                               | 1.92E+0                                             | 7.14E+0                                                        | 1.10E+1                                     |
| JD285      | 412101      | Repair of construction                                         | 建設補修                                                     | 8.37E+0                                                                     | 2.84E-1                                               | 1.98E+0                                             | 6.10E+0                                                        | 1.11E+1                                     |
| JD286      | 413101      | Public construction of roads                                   | 道路関係公共事業                                                 | 6.49E+0                                                                     | 1.69E-1                                               | 2.53E+0                                             | 3.79E+0                                                        | 8.72E+0                                     |
| JD287      | 413102      | Public construction of rivers, drainages and others            | 河川・下水道・その他の公共事業                                          | 6.35E+0                                                                     | 2.06E-1                                               | 2.68E+0                                             | 3.46E+0                                                        | 8.09E+0                                     |
| JD288      | 413103      | Agricultural public construction                               | 農林関係公共事業                                                 | 6.86E+0                                                                     | 1.57E-1                                               | 2.72E+0                                             | 3.99E+0                                                        | 9.05E+0                                     |
| JD289      | 413201      | Railway construction                                           | 鉄道軌道建設                                                   | 8.49E+0                                                                     | 5.94E-2                                               | 2.59E+0                                             | 5.84E+0                                                        | 8.66E+0                                     |
| JD290      | 413202      | Electric power facilities construction                         | 電力施設建設                                                   | 1.46E+1                                                                     | 6.22E-2                                               | 1.66E+0                                             | 1.29E+1                                                        | 1.58E+1                                     |
| JD291      | 413203      | Telecommunication facilities construction                      | 電気通信施設建設                                                 | 1.22E+1                                                                     | 6.24E-2                                               | 1.60E+0                                             | 1.06E+1                                                        | 1.49E+1                                     |
| JD292      | 413209      | Other civil engineering and construction                       | その他の土木建設                                                 | 6.60E+0                                                                     | 1.26E-1                                               | 2.34E+0                                             | 4.13E+0                                                        | 8.91E+0                                     |
| JD293      | 5111001     | Electricity                                                    | 事業用電力                                                    | 1.79E+1                                                                     | 1.14E+1                                               | 1.20E+0                                             | 5.29E+0                                                        | 6.04E+0                                     |
| JD294      | 511104      | On-site power generation                                       | 自家発電                                                     | 1.01E+2                                                                     | 9.22E+1                                               | 2.01E+0                                             | 6.84E+0                                                        | 1.43E+0                                     |
| JD295      | 512101      | Gas supply                                                     | 都市ガス                                                     | 7.13E+0                                                                     | 3.56E-5                                               | 1.59E+0                                             | 5.54E+0                                                        | 2.88E+1                                     |
| JD296      | 512201      | Steam and hot water supply                                     | 熱供給業                                                     | 8.09E+0                                                                     | 2.43E+0                                               | 2.44E+0                                             | 3.21E+0                                                        | 9.36E+0                                     |
| JD297      | 521101      | Water supply                                                   | 上水道・簡易水道                                                 | 2.35E+0                                                                     | 1.30E-2                                               | 7.17E-1                                             | 1.62E+0                                                        | 1.05E+1                                     |
| JD298      | 521102      | Industrial water supply                                        | 工業用水                                                     | 1.72E+0                                                                     | 4.98E-3                                               | 7.42E-1                                             | 9.77E-1                                                        | 8.87E+0                                     |
| JD299      | 521103      | Sewage disposal **                                             | 下水道★                                                     | 2.15E+1                                                                     | 1.28E+1                                               | 3.22E+0                                             | 5.48E+0                                                        | 4.29E+0                                     |
| JD300      | 521201      | Waste management services (public) **                          | 廃棄物処理(公営)★★                                              | 5.78E+0                                                                     | 1.65E+0                                               | 1.48E+0                                             | 2.65E+0                                                        | 7.01E+0                                     |
| JD301      | 521202      | Waste management services (private)                            | 廃棄物処理(産業)                                                | 3.24E+0                                                                     | 5.38E-1                                               | 8.95E-1                                             | 1.81E+0                                                        | 8.40E+0                                     |
| JD302      | 611101      | Wholesale trade                                                | 卸売                                                       | 2.04E+0                                                                     | 5.20E-3                                               | 4.53E-1                                             | 1.58E+0                                                        | 4.30E+1                                     |
| JD303      | 611201      | Retail trade                                                   | 小売                                                       | 2.27E+0                                                                     | 4.67E-2                                               | 9.59E-1                                             | 1.26E+0                                                        | 1.02E+1                                     |
| JD304      | 621101      | Financial service                                              | 金融                                                       | 1.17E+0                                                                     | 7.01E-3                                               | 3.76E-1                                             | 7.91E-1                                                        | 1.65E+1                                     |
| JD305      | 621201      | Life insurance                                                 | 生命保険                                                     | 1.31E+0                                                                     | 8.95E-3                                               | 4.37E-1                                             | 8.65E-1                                                        | 1.24E+1                                     |
| JD306      | 621202      | Non-life insurance                                             | 損害保険                                                     | 1.10E+0                                                                     | 7.09E-3                                               | 3.98E-1                                             | 6.99E-1                                                        | 1.24E+1                                     |
| JD307      | 641101      | Real estate agencies and managers                              | 不動産仲介・管理業                                                | 1.22E+0                                                                     | 1.52E-2                                               | 4.92E-1                                             | 7.17E-1                                                        | 1.06E+1                                     |
| JD308      | 641102      | Real estate rental service                                     | 不動産賃貸業                                                   | 9.28E-1                                                                     | 2.14E-2                                               | 4.18E-1                                             | 4.89E-1                                                        | 9.57E+0                                     |
| JD309      | 642101      | House rent                                                     | 住宅賃貸料                                                    | 9.71E-1                                                                     | 2.68E-2                                               | 2.69E-1                                             | 6.75E-1                                                        | 1.10E+1                                     |
| JD310      | 642201      | House rent (imputed house rent)                                | 住宅賃貸料(帰属家賃)                                              | 5.06E-1                                                                     | 0.00E+0                                               | 1.43E-1                                             | 3.64E-1                                                        | 1.13E+1                                     |
| JD311      | 711101      | Railway transport (passengers)                                 | 鉄道旅客輸送                                                   | 3.17E+0                                                                     | 1.15E-2                                               | 1.52E+0                                             | 1.63E+0                                                        | 8.25E+0                                     |
| JD312      | 712101      | Railway transport (freight)                                    | 鉄道貨物輸送                                                   | 4.40E+0                                                                     | 3.55E-2                                               | 1.70E+0                                             | 2.66E+0                                                        | 9.40E+0                                     |
| JD313      | 712101      | Bus transport service                                          | バス                                                       | 3.24E+0                                                                     | 5.10E-1                                               | 7.34E-1                                             | 1.99E+0                                                        | 1.54E+1                                     |
| JD314      | 712102      | Hired car and taxi transport                                   | ハイヤー・タクシー                                                | 2.77E+0                                                                     | 1.15E-2                                               | 4.27E-1                                             | 2.33E+0                                                        | 2.02E+1                                     |
| JD315      | 712201      | Road freight transport(except Self-transport by private cars)  | 道路貨物輸送(除自家輸送)                                            | 3.95E+0                                                                     | 6.06E-1                                               | 1.12E+0                                             | 2.23E+0                                                        | 1.50E+1                                     |
| JD316      | 713101      | Self-transport by private cars (passengers)                    | 自家輸送(旅客自動車)                                              | 1.15E+1                                                                     | 4.14E-1                                               | 2.87E+0                                             | 8.18E+0                                                        | 2.04E+1                                     |
| JD317      | 713201      | Self-transport by private cars (freight)                       | 自家輸送(貨物自動車)                                              | 1.15E+1                                                                     | 1.37E+0                                               | 2.76E+0                                             | 7.40E+0                                                        | 1.76E+1                                     |
| JD318      | 714101      | Ocean transport                                                | 外洋輸送                                                     | 1.09E+2                                                                     | 1.26E+1                                               | 1.42E+0                                             | 9.53E+1                                                        | 6.80E+1                                     |
| JD319      | 714201      | Coastal and inland water transport                             | 沿海・内水面輸送                                                 | 7.55E+1                                                                     | 6.94E+1                                               | 2.06E+0                                             | 4.01E+0                                                        | 1.32E+0                                     |
| JD320      | 714301      | Harbor transport service                                       | 港湾運送                                                     | 6.09E+0                                                                     | 4.58E+0                                               | 4.42E-1                                             | 1.07E+0                                                        | 3.26E+0                                     |
| JD321      | 715101      | Air transport                                                  | 航空輸送                                                     | 6.53E+0                                                                     | 1.86E-1                                               | 7.85E-1                                             | 5.56E+0                                                        | 2.02E+1                                     |
| JD322      | 716101      | Consigned freight forwarding                                   | 貨物利用運送                                                   | 1.87E+0                                                                     | 1.78E-1                                               | 5.12E-1                                             | 1.18E+0                                                        | 1.21E+1                                     |
| JD323      | 717101      | Storage facility service                                       | 倉庫                                                       | 2.37E+0                                                                     | 1.76E-2                                               | 1.12E+0                                             | 1.23E+0                                                        | 8.33E+0                                     |
| JD324      | 718101      | Packing service                                                | こん包                                                      | 5.09E+0                                                                     | 1.39E-2                                               | 1.62E+0                                             | 3.45E+0                                                        | 1.04E+1                                     |
| JD325      | 718901      | Facility service for road transport                            | 道路輸送施設提供                                                 | 1.46E+0                                                                     | 1.27E-2                                               | 6.09E-1                                             | 8.42E-1                                                        | 9.59E+0                                     |
| JD326      | 718902      | Port and water traffic control **                              | 水運施設管理★★                                                 | 9.87E+0                                                                     | 7.34E+0                                               | 6.72E-1                                             | 1.85E+0                                                        | 2.78E+0                                     |
| JD327      | 718903      | Services relating to water transport                           | その他の水運付帯サービス                                             | 1.53E+0                                                                     | 7.33E-1                                               | 2.45E-1                                             | 5.49E-1                                                        | 6.02E+0                                     |
| JD328      | 718904      | Airport and air traffic control (public) **                    | 航空施設管理(国営)★★                                             | 2.70E+0                                                                     | 2.67E-2                                               | 9.65E-1                                             | 1.71E+0                                                        | 1.00E+1                                     |
| JD329      | 718905      | Airport and air traffic control                                | 航空施設管理(産業)                                               | 2.80E+0                                                                     | 4.80E-2                                               | 1.12E+0                                             | 1.63E+0                                                        | 9.46E+0                                     |
| JD330      | 718906      | Services relating to air transport                             | その他の航空付帯サービス                                             | 1.61E+0                                                                     | 2.32E-2                                               | 6.25E-1                                             | 9.60E-1                                                        | 9.58E+0                                     |
| JD331      | 718909      | Travel agency and other services relating to transport         | 旅行・その他の運輸付帯サービス                                          | 1.29E+0                                                                     | 0.00E+0                                               | 4.49E-1                                             | 8.46E-1                                                        | 1.40E+1                                     |
| JD332      | 731101      | Postal service・                                                | 郵便・信書便                                                   | 1.26E+0                                                                     | 0.00E+0                                               | 4.44E-1                                             | 8.15E-1                                                        | 1.78E+1                                     |
| JD333      | 731201      | Fixed telecommunication                                        | 固定電気通信                                                   | 1.50E+0                                                                     | 0.00E+0                                               | 5.04E-1                                             | 9.93E-1                                                        | 1.52E+1                                     |
| JD334      | 731202      | Mobile telecommunication                                       | 移動電気通信                                                   | 1.08E+0                                                                     | 0.00E+0                                               | 3.62E-1                                             | 7.18E-1                                                        | 1.19E+1                                     |
| JD335      | 731203      | Other telecommunication                                        | その他の電気通信                                                 | 1.83E+0                                                                     | 0.00E+0                                               | 6.38E-1                                             | 1.20E+0                                                        | 1.30E+1                                     |
| JD336      | 731909      | Other services relating to communication                       | その他の通信サービス                                               | 1.74E+0                                                                     | 0.00E+0                                               | 6.10E-1                                             | 1.13E+0                                                        | 1.07E+1                                     |
| JD337      | 732101      | Public broadcasting                                            | 公共放送                                                     | 1.97E+0                                                                     | 0.00E+0                                               | 6.21E-1                                             | 1.35E+0                                                        | 1.58E+1                                     |
| JD338      | 732102      | Private broadcasting                                           | 民間放送                                                     | 2.51E+0                                                                     | 0.00E+0                                               | 5.54E-1                                             | 1.96E+0                                                        | 2.70E+1                                     |
| JD339      | 732103      | Cable broadcasting                                             | 有線放送                                                     | 1.97E+0                                                                     | 0.00E+0                                               | 5.72E-1                                             | 1.40E+0                                                        | 1.39E+1                                     |
| JD340      | 733101      | Information services                                           | 情報サービス                                                   | 1.55E+0                                                                     | 2.22E-4                                               | 5.66E-1                                             | 9.80E-1                                                        | 1.18E+1                                     |
| JD341      | 734101      | Internet based services                                        | インターネット附随サービス                                            | 1.75E+0                                                                     | 3.17E-3                                               | 5.94E-1                                             | 1.15E+0                                                        | 1.27E+1                                     |
| JD342      | 735101      | Image information production and distribution industry         | 映像情報制作・配給業                                               | 5.39E+0                                                                     | 9.86E-2                                               | 6.53E-1                                             | 4.64E+0                                                        | 4.43E+1                                     |
| JD343      | 735102      | Newspaper                                                      | 新聞                                                       | 9.16E+0                                                                     | 1.49E-2                                               | 4.66E+0                                             | 4.48E+0                                                        | 8.57E+0                                     |
| JD344      | 735103      | Publication                                                    | 出版                                                       | 6.19E+0                                                                     | 3.30E-2                                               | 3.69E+0                                             | 2.47E+0                                                        | 7.08E+0                                     |
| JD345      | 735104      | News syndicates and private detective agencies                 | ニュース供給・興信所                                               | 1.60E+0                                                                     | 1.32E-3                                               | 4.91E-1                                             | 1.11E+0                                                        | 1.63E+1                                     |
| JD346      | 811101      | Public administration (central) **                             | 公務(中央)★★                                                 | 3.13E+0                                                                     | 3.45E-2                                               | 6.07E-1                                             | 2.49E+0                                                        | 1.41E+1                                     |
| JD347      | 811201      | Public administration (local) **                               | 公務(地方)★★                                                 | 1.46E+0                                                                     | 6.31E-2                                               | 5.02E-1                                             | 8.99E-1                                                        | 1.06E+1                                     |
| JD348      | 821101      | School education (public) **                                   | 学校教育(国公立)★★                                              | 7.34E-1                                                                     | 1.62E-2                                               | 3.12E-1                                             | 4.06E-1                                                        | 9.21E+0                                     |
| JD349      | 821102      | School education (private) *                                   | 学校教育(私立)★                                                | 1.79E+0                                                                     | 4.62E-2                                               | 6.08E-1                                             | 1.14E+0                                                        | 1.00E+1                                     |
| JD350      | 821301      | Social education (public) **                                   | 社会教育(国公立)★★                                              | 2.40E+0                                                                     | 2.59E-1                                               | 9.15E-1                                             | 1.22E+0                                                        | 8.72E+0                                     |
| JD351      | 821302      | Social education (private, non-profit) *                       | 社会教育(非営利)★                                               | 4.14E+0                                                                     | 1.04E-1                                               | 1.35E+0                                             | 2.69E+0                                                        | 9.35E+0                                     |
| JD352      | 821303      | Other educational and training institutions (public) **        | その他の教育訓練機関(国公立)★★                                        | 3.94E+0                                                                     | 1.45E-1                                               | 1.39E+0                                             | 2.40E+0                                                        | 1.29E+1                                     |
| JD353      | 821304      | Other educational and training institutions (profit-making)    | その他の教育訓練機関(産業)                                           | 2.60E+0                                                                     | 1.62E-1                                               | 7.04E-1                                             | 1.73E+0                                                        | 1.29E+1                                     |

Table A10: Embodied global SO<sub>x</sub> intensities of Japanese goods and services based on producer price in 2005 [5/5]

| Sector no. | Sector code | Sector name<br>[Japanese domestic commodity]                                                | Sector name in Japanese<br>[Japanese domestic commodity] | Embodied global SO <sub>x</sub> intensities based on producer price in 2005 |                                                       |                                                     |                                                                |                                             |
|------------|-------------|---------------------------------------------------------------------------------------------|----------------------------------------------------------|-----------------------------------------------------------------------------|-------------------------------------------------------|-----------------------------------------------------|----------------------------------------------------------------|---------------------------------------------|
|            |             |                                                                                             |                                                          | Total                                                                       | (D) Direct emissions<br>in Japan during<br>production | (S) Induced<br>emissions in Japan<br>through supply | (F) Induced emissions<br>in foreign country's<br>supply chains | Coefficient of variance<br>of the intensity |
|            |             |                                                                                             |                                                          | kg/M-JPY                                                                    | kg/M-JPY                                              | kg/M-JPY                                            | kg/M-JPY                                                       | %                                           |
| JD354      | 822101      | Research institutes for natural science (public) **                                         | 自然科学研究機関(国公立)★★                                          | 3.93E+0                                                                     | 2.22E-1                                               | 1.35E+0                                             | 2.35E+0                                                        | 1.08E+1                                     |
| JD355      | 822102      | Research institutes for cultural and social science (public) **                             | 人文科学研究機関(国公立)★★                                          | 3.88E+0                                                                     | 2.55E-1                                               | 1.34E+0                                             | 2.29E+0                                                        | 1.06E+1                                     |
| JD356      | 822103      | Research institutes for natural sciences (private, non-profit) *                            | 自然科学研究機関(非営利)★                                           | 3.37E+0                                                                     | 6.59E-2                                               | 1.07E+0                                             | 2.23E+0                                                        | 1.27E+1                                     |
| JD357      | 822104      | Research institutes for cultural and social science (private, non-profit) *                 | 人文科学研究機関(非営利)★                                           | 2.04E+0                                                                     | 2.63E-2                                               | 7.71E-1                                             | 1.24E+0                                                        | 1.07E+1                                     |
| JD358      | 822105      | Research institutes for natural sciences (profit-making)                                    | 自然科学研究機関(産業)                                             | 5.99E+0                                                                     | 6.92E-1                                               | 1.78E+0                                             | 3.52E+0                                                        | 1.12E+1                                     |
| JD359      | 822106      | Research institutes for cultural and social science (profit-making)                         | 人文科学研究機関(産業)                                             | 1.90E+0                                                                     | 2.95E-3                                               | 7.25E-1                                             | 1.18E+0                                                        | 1.17E+1                                     |
| JD360      | 822201      | Research and development (intra-enterprise)                                                 | 企業内研究開発                                                  | 3.56E+0                                                                     | 1.84E-1                                               | 1.17E+0                                             | 2.21E+0                                                        | 9.94E+0                                     |
| JD361      | 831101      | Medical service (public)                                                                    | 医療(国公立)                                                  | 3.79E+0                                                                     | 6.22E-2                                               | 1.03E+0                                             | 2.70E+0                                                        | 1.35E+1                                     |
| JD362      | 831102      | Medical service (non-profit foundations, etc.)                                              | 医療(公益法人等)                                                | 3.17E+0                                                                     | 7.24E-2                                               | 8.73E-1                                             | 2.22E+0                                                        | 1.41E+1                                     |
| JD363      | 831103      | Medical service (medical corporations, etc.)                                                | 医療(医療法人等)                                                | 3.45E+0                                                                     | 4.08E-2                                               | 8.83E-1                                             | 2.52E+0                                                        | 1.48E+1                                     |
| JD364      | 831201      | Health and hygiene (public) **                                                              | 保健衛生(国公立)★★                                              | 2.30E+0                                                                     | 1.59E-1                                               | 7.59E-1                                             | 1.38E+0                                                        | 9.47E+0                                     |
| JD365      | 831202      | Health and hygiene (profit-making)                                                          | 保健衛生(産業)                                                 | 2.90E+0                                                                     | 2.16E-1                                               | 9.22E-1                                             | 1.76E+0                                                        | 9.71E+0                                     |
| JD366      | 831301      | Social insurance (public) **                                                                | 社会保険事業(国公立)★★                                            | 1.74E+0                                                                     | 0.00E+0                                               | 6.76E-1                                             | 1.07E+0                                                        | 1.03E+1                                     |
| JD367      | 831302      | Social insurance (private, non-profit) *                                                    | 社会保険事業(非営利)★                                             | 1.72E+0                                                                     | 0.00E+0                                               | 7.48E-1                                             | 9.74E-1                                                        | 9.98E+0                                     |
| JD368      | 831303      | Social welfare (public) **                                                                  | 社会福祉(国公立)★★                                              | 2.55E+0                                                                     | 1.14E-1                                               | 1.00E+0                                             | 1.43E+0                                                        | 8.43E+0                                     |
| JD369      | 831304      | Social welfare (private, non-profit) *                                                      | 社会福祉(非営利)★                                               | 2.78E+0                                                                     | 7.18E-2                                               | 1.09E+0                                             | 1.62E+0                                                        | 8.55E+0                                     |
| JD370      | 831305      | Social welfare (profit-making)                                                              | 社会福祉(産業)                                                 | 2.90E+0                                                                     | 1.37E-1                                               | 1.10E+0                                             | 1.66E+0                                                        | 8.49E+0                                     |
| JD371      | 831401      | Nursing care (In-home)                                                                      | 介護(居宅)                                                   | 2.49E+0                                                                     | 6.05E-2                                               | 1.07E+0                                             | 1.36E+0                                                        | 8.21E+0                                     |
| JD372      | 831402      | Nursing care (In-facility)                                                                  | 介護(施設)                                                   | 2.92E+0                                                                     | 6.99E-2                                               | 1.29E+0                                             | 1.56E+0                                                        | 8.23E+0                                     |
| JD373      | 841101      | Private non-profit institutions serving enterprises                                         | 対企業民間非営利団体                                               | 3.04E+0                                                                     | 1.33E-1                                               | 8.07E-1                                             | 2.10E+0                                                        | 1.12E+1                                     |
| JD374      | 841102      | Private non-profit institutions serving households, n.e.c. *                                | 対家計民間非営利団体(除別掲)★                                         | 1.98E+0                                                                     | 1.09E-1                                               | 6.49E-1                                             | 1.22E+0                                                        | 1.06E+1                                     |
| JD375      | 851101      | Advertising services                                                                        | 広告                                                       | 3.50E+0                                                                     | 6.38E-4                                               | 1.38E+0                                             | 2.12E+0                                                        | 1.41E+1                                     |
| JD376      | 851201      | Goods rental and leasing (except car rental)                                                | 物品賃貸業(除貸自動車)                                             | 1.91E+0                                                                     | 5.09E-3                                               | 3.29E-1                                             | 1.58E+0                                                        | 1.29E+1                                     |
| JD377      | 851301      | Car rental and leasing                                                                      | 貸自動車業                                                    | 1.29E+0                                                                     | 4.46E-2                                               | 3.26E-1                                             | 9.21E-1                                                        | 1.42E+1                                     |
| JD378      | 851410      | Repair of motor vehicles                                                                    | 自動車修理                                                    | 6.09E+0                                                                     | 1.50E-2                                               | 1.23E+0                                             | 4.84E+0                                                        | 1.25E+1                                     |
| JD379      | 851510      | Repair of machine                                                                           | 機械修理                                                     | 8.73E+0                                                                     | 8.69E-3                                               | 1.08E+0                                             | 7.63E+0                                                        | 1.35E+1                                     |
| JD380      | 851901      | Building maintenance services                                                               | 建物サービス                                                   | 1.34E+0                                                                     | 3.89E-2                                               | 3.87E-1                                             | 9.19E-1                                                        | 1.24E+1                                     |
| JD381      | 851902      | Judicial, financial and accounting services                                                 | 法務・財務・会計サービス                                             | 9.47E-1                                                                     | 1.32E-1                                               | 2.79E-1                                             | 5.36E-1                                                        | 1.14E+1                                     |
| JD382      | 851903      | Civil engineering and construction services                                                 | 土木建築サービス                                                 | 2.19E+0                                                                     | 1.41E-1                                               | 8.67E-1                                             | 1.19E+0                                                        | 9.08E+0                                     |
| JD383      | 851904      | Worker dispatching services                                                                 | 労働者派遣サービス                                                | 2.06E-1                                                                     | 3.95E-3                                               | 7.55E-2                                             | 1.27E-1                                                        | 1.24E+1                                     |
| JD384      | 851909      | Other business services                                                                     | その他の対事業所サービス                                             | 1.05E+0                                                                     | 2.93E-2                                               | 3.05E-1                                             | 7.20E-1                                                        | 1.24E+1                                     |
| JD385      | 861101      | Movie theaters                                                                              | 映画館                                                      | 4.65E+0                                                                     | 1.09E-2                                               | 1.08E+0                                             | 3.56E+0                                                        | 3.60E+1                                     |
| JD386      | 861102      | Performances (except otherwise classified), theatrical companies                            | 興行場(除別掲)・興行団                                             | 1.87E+0                                                                     | 1.65E-2                                               | 5.15E-1                                             | 1.34E+0                                                        | 1.74E+1                                     |
| JD387      | 861103      | Amusement and recreation facilities                                                         | 遊戯場                                                      | 3.25E+0                                                                     | 2.06E-1                                               | 1.01E+0                                             | 2.04E+0                                                        | 9.88E+0                                     |
| JD388      | 861104      | Stadiums and companies of bicycle, horse, motorcar and motorboat races                      | 競輪・競馬等の競走場・競技団                                           | 1.80E+0                                                                     | 5.04E-2                                               | 5.84E-1                                             | 1.16E+0                                                        | 1.14E+1                                     |
| JD389      | 861105      | Sport facility service, public gardens and amusement parks                                  | スポーツ施設提供業・公園・遊園地                                         | 2.17E+0                                                                     | 7.14E-2                                               | 6.54E-1                                             | 1.44E+0                                                        | 1.12E+1                                     |
| JD390      | 861109      | Other amusement and recreation services                                                     | その他の娯楽                                                   | 2.11E+0                                                                     | 8.35E-2                                               | 7.33E-1                                             | 1.29E+0                                                        | 1.15E+1                                     |
| JD391      | 861201      | General eating and drinking places (except coffee shops)                                    | 一般飲食店(除喫茶店)                                              | 5.98E+0                                                                     | 2.86E-2                                               | 2.25E+0                                             | 3.70E+0                                                        | 9.51E+0                                     |
| JD392      | 861202      | Coffee shops                                                                                | 喫茶店                                                      | 4.91E+0                                                                     | 3.57E-2                                               | 1.68E+0                                             | 3.20E+0                                                        | 1.01E+1                                     |
| JD393      | 861203      | Eating and drinking places for pleasures                                                    | 遊興飲食店                                                    | 4.01E+0                                                                     | 3.17E-2                                               | 1.40E+0                                             | 2.58E+0                                                        | 1.06E+1                                     |
| JD394      | 861301      | Hotels                                                                                      | 宿泊業                                                      | 4.90E+0                                                                     | 6.47E-2                                               | 2.08E+0                                             | 2.75E+0                                                        | 8.81E+0                                     |
| JD395      | 861401      | Cleaning                                                                                    | 洗濯業                                                      | 2.76E+0                                                                     | 4.95E-1                                               | 8.66E-1                                             | 1.40E+0                                                        | 9.25E+0                                     |
| JD396      | 861402      | Barber shops                                                                                | 理容業                                                      | 1.48E+0                                                                     | 0.00E+0                                               | 3.88E-1                                             | 1.10E+0                                                        | 1.27E+1                                     |
| JD397      | 861403      | Beauty shops                                                                                | 美容業                                                      | 1.78E+0                                                                     | 0.00E+0                                               | 4.62E-1                                             | 1.31E+0                                                        | 1.15E+1                                     |
| JD398      | 861404      | Public baths                                                                                | 浴場業                                                      | 3.48E+0                                                                     | 1.82E-1                                               | 1.26E+0                                             | 2.04E+0                                                        | 1.17E+1                                     |
| JD399      | 861409      | Other cleaning, barber shops, beauty shops and public baths                                 | その他の洗濯・理容・美容・浴場業                                         | 2.64E+0                                                                     | 0.00E+0                                               | 7.88E-1                                             | 1.85E+0                                                        | 1.17E+1                                     |
| JD400      | 861901      | Photographic studios                                                                        | 写真業                                                      | 2.86E+0                                                                     | 3.79E-2                                               | 8.37E-1                                             | 1.98E+0                                                        | 1.08E+1                                     |
| JD401      | 861902      | Ceremonial occasions                                                                        | 冠婚葬祭業                                                    | 4.19E+0                                                                     | 7.35E-1                                               | 1.39E+0                                             | 2.07E+0                                                        | 8.14E+0                                     |
| JD402      | 861903      | Miscellaneous repairs, n.e.c.                                                               | 各種修理業(除別掲)                                               | 3.07E+0                                                                     | 1.69E-1                                               | 7.26E-1                                             | 2.17E+0                                                        | 1.05E+1                                     |
| JD403      | 861904      | Supplementary tutorial schools, instruction services for arts, culture and technical skills | 個人教授業                                                    | 1.52E+0                                                                     | 5.89E-2                                               | 5.51E-1                                             | 9.13E-1                                                        | 1.03E+1                                     |
| JD404      | 861909      | Other personal services                                                                     | その他の対個人サービス                                              | 2.00E+0                                                                     | 1.05E-1                                               | 5.49E-1                                             | 1.34E+0                                                        | 1.05E+1                                     |
| JD405      | 890000      | Office supplies                                                                             | 事務用品                                                     | 1.49E+1                                                                     | 0.00E+0                                               | 5.69E+0                                             | 9.20E+0                                                        | 9.83E+0                                     |
| JD406      | 900000      | Activities not elsewhere classified                                                         | 分類不明                                                     | 4.86E+0                                                                     | 1.71E-1                                               | 1.53E+0                                             | 3.15E+0                                                        | 1.06E+1                                     |
