# Supplementary material
Source: PubMed Central journal article supplement (PMC3424834)

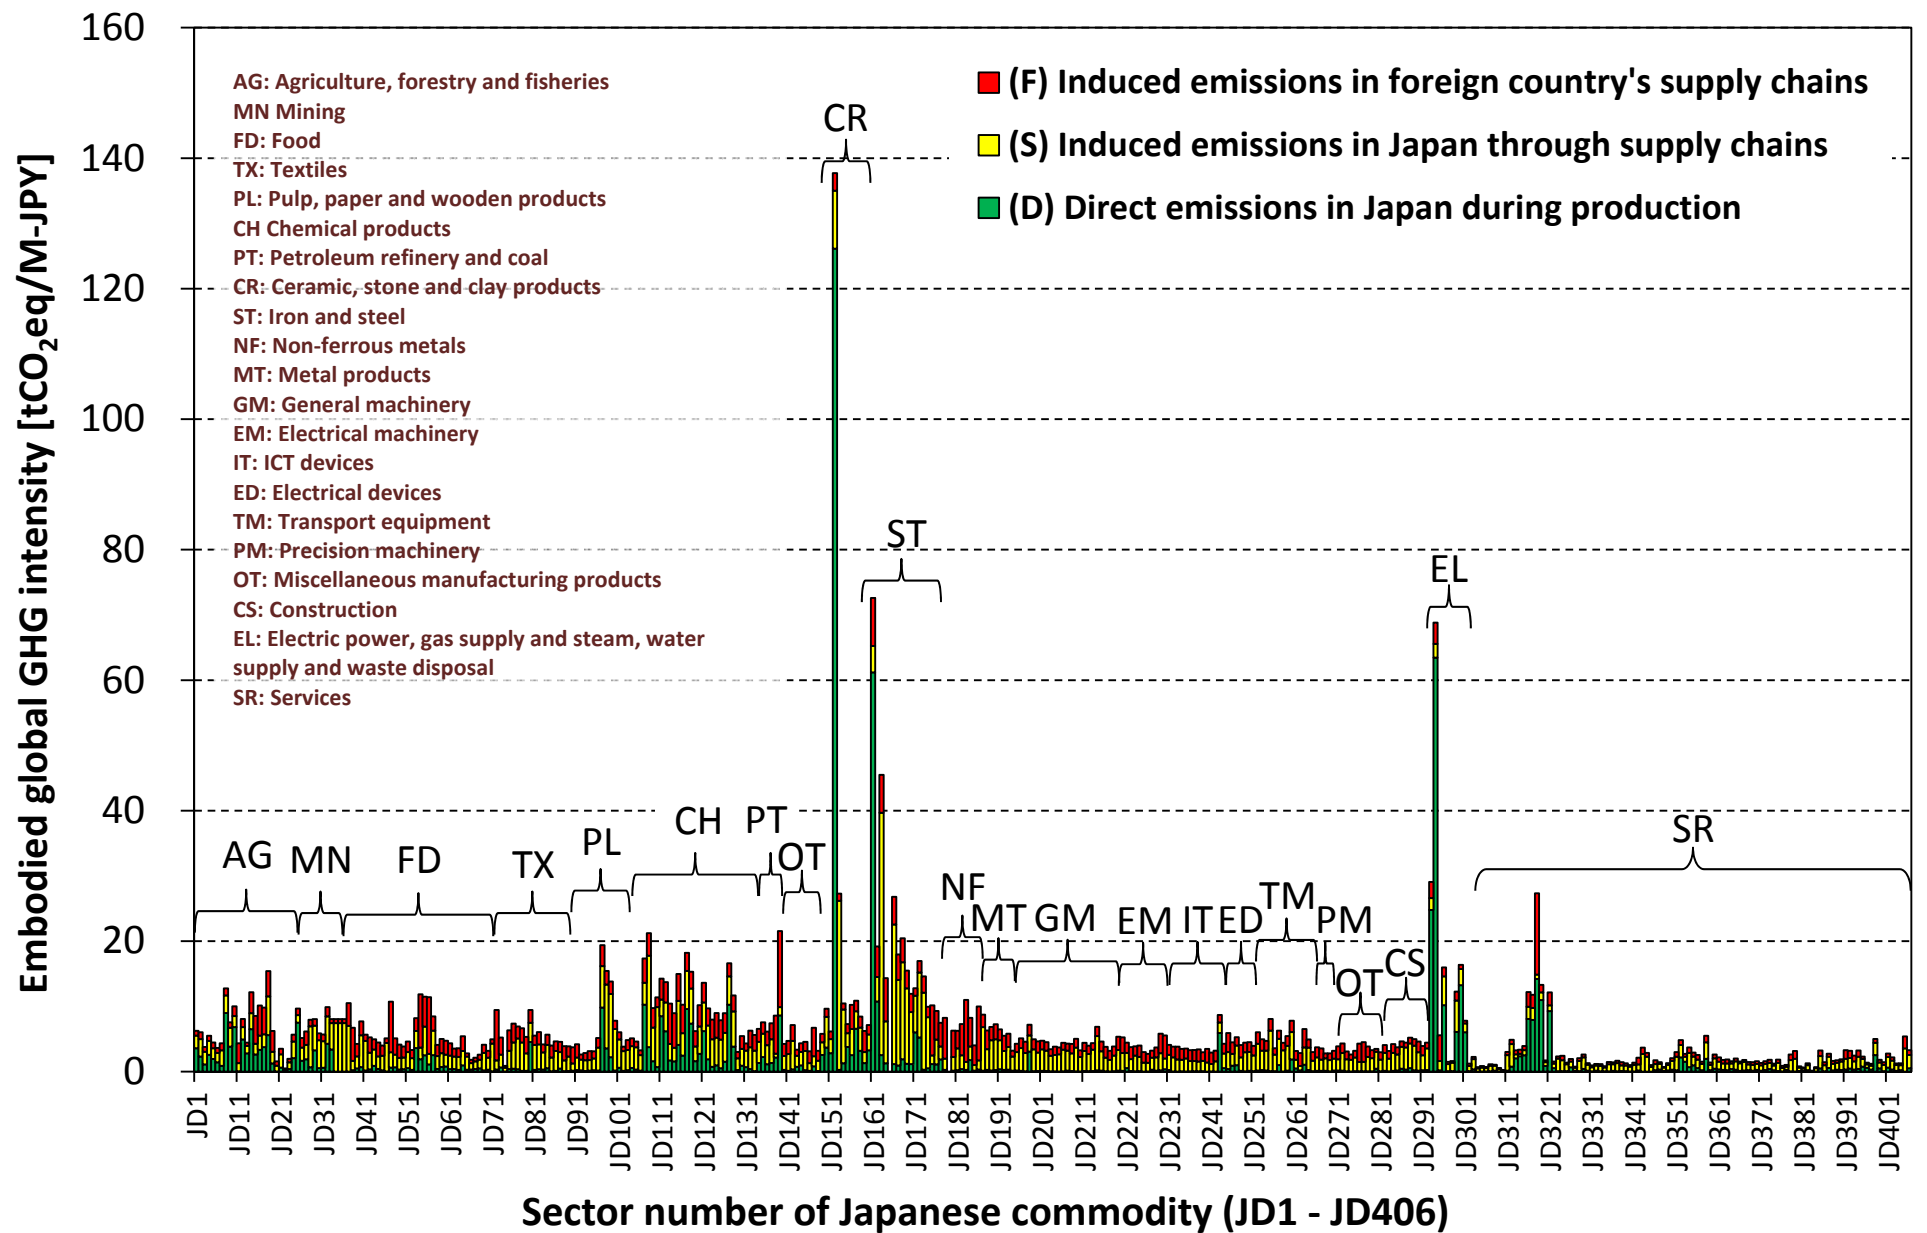

Supplement: es2043257_si_003.pdf [file es2043257_si_003.pdf]
